# Supplementary material for: Biological factors associated with long COVID and comparative analysis of SARS-CoV-2 spike protein variants: a retrospective study in Thailand
Source: PeerJ. 2024 Aug 19;12:e17898. doi: 10.7717/peerj.17898 (PMC11340629; doi:10.7717/peerj.17898)
Supplement: Supplemental Information 1 [file peerj-12-17898-s001.xlsx]

## Sheet: Anonymous490 screened subjects 
Participant ID	Sex	Age(year)	Time of detection	COVID-19 RT-qPCR Result from Maharat Nakorn Ratchasima Hospital			Week of 2021	Edemiology week in Thailand	Week of 2022	Edemiology week in Thailand
1	Female	34	2021-06-01	Detected			1	54	1	106		Data source: https://drive.google.com/drive/folders/13k14Hs61pgrK8raSMS9LFQn83PKswS-b
2	Male	31	2021-06-01	Detected			2	55	2	107
3	Male	38	2021-06-01	Detected			3	56	3	108
4	Male	30	2021-06-01	Detected			4	57	4	109
5	Male	35	2021-06-01	Detected			5	58	5	110
6	Male	33	2021-06-01	Detected			6	59	6	111
7	Male	46	2021-06-01	Detected			7	60	7	112
8	Male	59	2021-06-01	Detected			8	61	8	113
9	Male	66	2021-06-01	Detected			9	62	9	114
10	Male	40	2021-06-01	Detected			10	63	10	115
11	Female	26	2021-06-01	Detected			11	64	11	116
12	Female	38	2021-06-01	Detected			12	65	12	117
13	Female	26	2021-06-01	Detected			13	66	13	118
14	Female	45	2021-06-01	Detected			14	67	14	119
15	Female	44	2021-06-01	Detected			15	68	15	120
16	Female	59	2021-06-01	Detected			16	69	16	121
17	Male	65	2021-06-01	Detected			17	70	17	122
18	Male	76	2021-06-01	Detected			18	71	18	123
19	Female	32	2021-06-01	Detected			19	72	19	124
20	Male	50	2021-06-01	Detected			20	73	20	125
21	Male	45	2021-06-01	Detected			21	74	21	126
22	Male	38	2021-06-01	Detected			22	75	22	127
23	Female	28	2021-06-01	Detected			23	76	23	128
24	Female	54	2021-06-01	Detected			24	77	24	129
25	Female	30	2021-06-01	Detected			25	78	25	130
26	Female	56	2021-06-01	Detected			26	79	26	131
27	Female	31	2021-06-01	Detected			July_27	80	27	132
28	Male	49	2021-06-01	Detected			28	81	28	133
29	Female	47	2021-06-01	Detected			29	82	29	134
30	Female	51	2021-06-01	Detected			30	83	30	135
31	Female	15	2021-06-01	Detected			31	84	31	136
32	Female	61	2021-06-01	Detected			32	85	32	137
33	Male	20	2021-06-01	Detected			33	86	33	138
34	Male	16	2021-06-01	Detected			34	87	34	139
35	Female	35	2021-06-01	Detected			35	88	August_35	140
36	Male	37	2021-06-01	Detected			36	89	36	141
37	Male	24	2021-06-01	Detected			37	90	37	142
38	Male	51	2021-06-01	Detected			38	91	38	143
39	Male	36	2021-07-01	Detected			39	92	39	144
40	Male	28	2021-07-01	Detected			40	93	40	145
41	Male	29	2021-07-01	Detected			41	94	41	146
42	Male	19	2021-07-01	Detected			42	95	42	147
43	Male	40	2021-07-01	Detected			43	96	43	148
44	Female	29	2021-07-01	Detected			November_44	97	44	149
45	Female	35	2021-07-01	Detected			45	98	45	150
46	Male	44	2021-07-01	Detected			46	99	46	151
47	Female	57	2021-07-01	Detected			47	100	47	152
48	Female	62	2021-07-01	Detected			48	101	48	153
49	Female	52	2021-07-01	Detected			49	102	49	154
50	Female	60	2021-07-01	Detected			50	103	50	155
51	Female	65	2021-07-01	Detected			51	104	51	156
52	Female	43	2021-07-01	Detected			December_52	105	52	157
53	Female	74	2021-07-01	Detected
54	Female	38	2021-07-01	Detected
55	Female	27	2021-07-01	Detected			Delta peak
56	Female	58	2021-07-01	Detected			Omicron peak
57	Female	28	2021-07-01	Detected
58	Female	50	2021-07-01	Detected
59	Male	20	2021-07-01	Detected
60	Male	24	2021-07-01	Detected
61	Female	45	2021-07-01	Detected
62	Male	45	2021-07-01	Detected
63	Male	40	2021-07-01	Detected
64	Male	57	2021-07-01	Detected
65	Male	43	2021-07-01	Detected
66	Male	19	2021-07-01	Detected
67	Male	40	2021-07-01	Detected
68	Male	37	2021-07-01	Detected
69	Male	24	2021-07-01	Detected
70	Male	45	2021-07-01	Detected
71	Male	18	2021-07-01	Detected
72	Female	23	2021-07-01	Detected
73	Male	27	2021-07-01	Detected
74	Female	73	2021-07-01	Detected
75	Female	21	2021-07-01	Detected
76	Male	32	2021-08-01	Detected
77	Female	33	2021-08-01	Detected
78	Male	21	2021-08-01	Detected
79	Male	29	2021-08-01	Detected
80	Male	38	2021-08-01	Detected
81	Male	73	2021-08-01	Detected
82	Female	31	2021-08-01	Detected
83	Female	31	2021-08-01	Detected
84	Female	46	2021-08-01	Detected
85	Female	47	2021-08-01	Detected
86	Male	45	2021-08-01	Detected
87	Female	28	2021-08-01	Detected
88	Male	25	2021-08-01	Detected
89	Male	47	2021-08-01	Detected
90	Male	56	2021-08-01	Detected
91	Female	38	2021-08-01	Detected
92	Female	26	2021-08-01	Detected
93	Female	28	2021-08-01	Detected
94	Female	44	2021-08-01	Detected
95	Female	61	2021-08-01	Detected
96	Male	52	2021-08-01	Detected
97	Female	32	2021-08-01	Detected
98	Female	53	2021-08-01	Detected
99	Female	29	2021-08-01	Detected
100	Female	66	2021-08-01	Detected
101	Male	23	2021-08-01	Detected
102	Female	25	2021-08-01	Detected
103	Female	47	2021-08-01	Detected
104	Female	25	2021-08-01	Detected
105	Female	57	2021-08-01	Detected
106	Male	37	2021-08-01	Detected
107	Male	61	2021-08-01	Detected
108	Female	29	2021-08-01	Detected
109	Female	36	2021-08-01	Detected
110	Female	51	2021-08-01	Detected
111	Male	52	2021-08-01	Detected
112	Female	25	2021-08-01	Detected
113	Female	44	2021-08-01	Detected
114	Male	40	2021-08-01	Detected
115	Male	40	2021-08-01	Detected
116	Male	35	2021-08-01	Detected
117	Male	20	2021-08-01	Detected
118	Male	29	2021-08-01	Detected
119	Female	74	2021-08-01	Detected
120	Male	22	2021-08-01	Detected
121	Male	21	2021-08-01	Detected
122	Male	51	2021-08-01	Detected
123	Male	39	2021-08-01	Detected
124	Female	19	2021-08-01	Detected
125	Female	47	2021-08-01	Detected
126	Male	64	2021-08-01	Detected
127	Male	39	2021-08-01	Detected
128	Female	33	2021-08-01	Detected
129	Male	36	2021-09-01	Detected
130	Female	36	2021-09-01	Detected
131	Female	33	2021-09-01	Detected
132	Female	33	2021-09-01	Detected
133	Female	43	2021-09-01	Detected
134	Female	47	2021-09-01	Detected
135	Female	48	2021-09-01	Detected
136	Female	47	2021-09-01	Detected
137	Female	62	2021-09-01	Detected
138	Female	28	2021-09-01	Detected
139	Male	64	2021-09-01	Detected
140	Female	18	2021-09-01	Detected
141	Female	36	2021-09-01	Detected
142	Female	34	2021-09-01	Detected
143	Female	47	2021-09-01	Detected
144	Female	20	2021-09-01	Detected
145	Female	44	2021-09-01	Detected
146	Female	25	2021-09-01	Detected
147	Female	56	2021-09-01	Detected
148	Male	59	2021-09-01	Detected
149	Female	38	2021-09-01	Detected
150	Male	49	2021-09-01	Detected
151	Female	18	2021-09-01	Detected
152	Female	47	2021-09-01	Detected
153	Female	58	2021-09-01	Detected
154	Female	56	2021-09-01	Detected
155	Female	47	2021-09-01	Detected
156	Female	49	2021-09-01	Detected
157	Female	32	2021-09-01	Detected
158	Female	31	2021-09-01	Detected
159	Female	24	2021-09-01	Detected
160	Female	27	2021-09-01	Detected
161	Female	24	2021-09-01	Detected
162	Male	30	2021-09-01	Detected
163	Male	33	2021-09-01	Detected
164	Female	26	2021-09-01	Detected
165	Male	59	2021-09-01	Detected
166	Male	30	2021-09-01	Detected
167	Male	26	2021-09-01	Detected
168	Male	24	2021-09-01	Detected
169	Female	19	2021-09-01	Detected
170	Female	49	2021-09-01	Detected
171	Female	48	2021-09-01	Detected
172	Female	45	2021-09-01	Detected
173	Female	47	2021-09-01	Detected
174	Female	26	2021-09-01	Detected
175	Female	42	2021-09-01	Detected
176	Male	46	2021-09-01	Detected
177	Female	51	2021-09-01	Detected
178	Male	45	2021-09-01	Detected
179	Female	35	2021-09-01	Detected
180	Male	18	2021-09-01	Detected
181	Male	25	2021-11-01	Detected
182	Female	31	2021-11-01	Detected
183	Female	29	2021-11-01	Detected
184	Male	44	2021-12-01	Detected
185	Female	60	2021-12-01	Detected
186	Male	21	2021-12-01	Detected
187	Female	31	2021-12-01	Detected
188	Female	46	2021-12-01	Detected
189	Male	41	2021-12-01	Detected
190	Female	47	2021-12-01	Detected
191	Female	33	2021-12-01	Detected
192	Male	25	2021-12-01	Detected
193	Female	26	2021-12-01	Detected
194	Female	19	2021-12-01	Detected
195	Male	20	2021-12-01	Detected
196	Female	40	2021-12-01	Detected
197	Female	66	2021-12-01	Detected
198	Female	55	2021-12-01	Detected
199	Female	26	2021-12-01	Detected
200	Female	36	2021-12-01	Detected
201	Female	25	2021-12-01	Detected
202	Female	31	2021-12-01	Detected
203	Female	51	2022-01-01	Detected
204	Female	31	2022-01-01	Detected
205	Female	64	2022-01-01	Detected
206	Female	34	2022-01-01	Detected
207	Female	42	2022-01-01	Detected
208	Male	30	2022-01-01	Detected
209	Male	21	2022-01-01	Detected
210	Female	26	2022-01-01	Detected
211	Female	29	2022-01-01	Detected
212	Female	24	2022-01-01	Detected
213	Female	26	2022-01-01	Detected
214	Female	29	2022-01-01	Detected
215	Female	26	2022-01-01	Detected
216	Male	38	2022-02-01	Detected
217	Male	24	2022-02-01	Detected
218	Female	48	2022-02-01	Detected
219	Male	18	2022-02-01	Detected
220	Female	22	2022-02-01	Detected
221	Female	42	2022-02-01	Detected
222	Male	31	2022-02-01	Detected
223	Male	25	2022-02-01	Detected
224	Female	39	2022-02-01	Detected
225	Female	31	2022-02-01	Detected
226	Female	27	2022-02-01	Detected
227	Female	26	2022-02-01	Detected
228	Female	25	2022-02-01	Detected
229	Male	32	2022-02-01	Detected
230	Male	52	2022-02-01	Detected
231	Male	57	2022-02-01	Detected
232	Female	20	2022-02-01	Detected
233	Female	26	2022-02-01	Detected
234	Female	57	2022-02-01	Detected
235	Female	42	2022-02-01	Detected
236	Male	21	2022-02-01	Detected
237	Female	25	2022-02-01	Detected
238	Female	50	2022-02-01	Detected
239	Male	17	2022-02-01	Detected
240	Female	38	2022-02-01	Detected
241	Male	58	2022-02-01	Detected
242	Male	47	2022-02-01	Detected
243	Male	48	2022-02-01	Detected
244	Female	58	2022-02-01	Detected
245	Female	70	2022-02-01	Detected
246	Male	51	2022-03-01	Detected
247	Male	64	2022-03-01	Detected
248	Female	19	2022-03-01	Detected
249	Male	51	2022-03-01	Detected
250	Female	37	2022-03-01	Detected
251	Male	47	2022-03-01	Detected
252	Male	22	2022-03-01	Detected
253	Male	19	2022-03-01	Detected
254	Male	48	2022-03-01	Detected
255	Female	20	2022-03-01	Detected
256	Female	38	2022-03-01	Detected
257	Male	39	2022-03-01	Detected
258	Male	37	2022-03-01	Detected
259	Male	32	2022-03-01	Detected
260	Female	30	2022-03-01	Detected
261	Male	37	2022-03-01	Detected
262	Male	62	2022-03-01	Detected
263	Female	36	2022-03-01	Detected
264	Male	26	2022-03-01	Detected
265	Male	37	2022-03-01	Detected
266	Male	45	2022-03-01	Detected
267	Female	29	2022-03-01	Detected
268	Female	36	2022-03-01	Detected
269	Female	27	2022-03-01	Detected
270	Female	34	2022-03-01	Detected
271	Female	31	2022-03-01	Detected
272	Female	24	2022-03-01	Detected
273	Male	50	2022-03-01	Detected
274	Male	48	2022-03-01	Detected
275	Female	45	2022-03-01	Detected
276	Female	32	2022-03-01	Detected
277	Male	34	2022-03-01	Detected
278	Male	69	2022-03-01	Detected
279	Male	62	2022-03-01	Detected
280	Female	54	2022-03-01	Detected
281	Female	62	2022-03-01	Detected
282	Female	21	2022-03-01	Detected
283	Male	28	2022-03-01	Detected
284	Female	32	2022-03-01	Detected
285	Female	40	2022-03-01	Detected
286	Female	29	2022-03-01	Detected
287	Female	58	2022-03-01	Detected
288	Male	63	2022-03-01	Detected
289	Female	50	2022-04-01	Detected
290	Female	33	2022-04-01	Detected
291	Female	36	2022-04-01	Detected
292	Female	50	2022-04-01	Detected
293	Female	39	2022-04-01	Detected
294	Male	60	2022-04-01	Detected
295	Male	30	2022-04-01	Detected
296	Female	25	2022-04-01	Detected
297	Female	51	2022-04-01	Detected
298	Male	46	2022-04-01	Detected
299	Female	37	2022-04-01	Detected
300	Female	24	2022-04-01	Detected
301	Male	61	2022-04-01	Detected
302	Male	29	2022-04-01	Detected
303	Female	36	2022-04-01	Detected
304	Male	55	2022-04-01	Detected
305	Male	56	2022-04-01	Detected
306	Female	65	2022-04-01	Detected
307	Male	33	2022-04-01	Detected
308	Female	30	2022-04-01	Detected
309	Female	58	2022-04-01	Detected
310	Male	19	2022-04-01	Detected
311	Female	25	2022-04-01	Detected
312	Male	38	2022-04-01	Detected
313	Female	33	2022-04-01	Detected
314	Female	29	2022-04-01	Detected
315	Female	32	2022-04-01	Detected
316	Male	55	2022-04-01	Detected
317	Female	56	2022-04-01	Detected
318	Female	32	2022-04-01	Detected
319	Female	25	2022-04-01	Detected
320	Female	44	2022-04-01	Detected
321	Male	62	2022-04-01	Detected
322	Male	63	2022-04-01	Detected
323	Male	72	2022-04-01	Detected
324	Female	63	2022-04-01	Detected
325	Female	20	2022-05-01	Detected
326	Male	38	2022-05-01	Detected
327	Male	45	2022-05-01	Detected
328	Female	42	2022-05-01	Detected
329	Female	30	2022-05-01	Detected
330	Male	25	2022-05-01	Detected
331	Female	36	2022-05-01	Detected
332	Male	40	2022-05-01	Detected
333	Female	28	2022-05-01	Detected
334	Female	32	2022-05-01	Detected
335	Female	59	2022-05-01	Detected
336	Male	59	2022-05-01	Detected
337	Female	26	2022-05-01	Detected
338	Male	45	2022-05-01	Detected
339	Male	55	2022-05-01	Detected
340	Male	32	2022-05-01	Detected
341	Male	50	2022-05-01	Detected
342	Male	38	2022-05-01	Detected
343	Female	65	2022-05-01	Detected
344	Female	25	2022-05-01	Detected
345	Male	57	2022-05-01	Detected
346	Female	59	2022-05-01	Detected
347	Female	25	2022-05-01	Detected
348	Female	23	2022-05-01	Detected
349	Male	21	2022-05-01	Detected
350	Female	53	2022-05-01	Detected
351	Male	60	2022-05-01	Detected
352	Female	42	2022-05-01	Detected
353	Female	53	2022-05-01	Detected
354	Female	30	2022-05-01	Detected
355	Female	37	2022-05-01	Detected
356	Female	29	2022-05-01	Detected
357	Female	39	2022-05-01	Detected
358	Male	57	2022-05-01	Detected
359	Female	26	2022-05-01	Detected
360	Female	40	2022-05-01	Detected
361	Female	50	2022-05-01	Detected
362	Female	19	2022-05-01	Detected
363	Female	65	2022-05-01	Detected
364	Female	18	2022-06-01	Detected
365	Female	27	2022-06-01	Detected
366	Male	24	2022-06-01	Detected
367	Male	20	2022-06-01	Detected
368	Male	34	2022-06-01	Detected
369	Male	20	2022-06-01	Detected
370	Female	32	2022-06-01	Detected
371	Male	20	2022-06-01	Detected
372	Male	29	2022-06-01	Detected
373	Male	23	2022-06-01	Detected
374	Male	32	2022-06-01	Detected
375	Male	26	2022-06-01	Detected
376	Male	19	2022-06-01	Detected
377	Female	39	2022-06-01	Detected
378	Female	59	2022-06-01	Detected
379	Male	23	2022-06-01	Detected
380	Male	26	2022-06-01	Detected
381	Male	30	2022-06-01	Detected
382	Female	60	2022-06-01	Detected
383	Male	34	2022-06-01	Detected
384	Female	39	2022-06-01	Detected
385	Female	34	2022-06-01	Detected
386	Female	45	2022-06-01	Detected
387	Male	56	2022-06-01	Detected
388	Female	45	2022-06-01	Detected
389	Female	55	2022-06-01	Detected
390	Male	59	2022-06-01	Detected
391	Female	60	2022-06-01	Detected
392	Female	50	2022-06-01	Detected
393	Female	55	2022-06-01	Detected
394	Male	57	2022-06-01	Detected
395	Male	40	2022-06-01	Detected
396	Female	58	2022-06-01	Detected
397	Female	47	2022-06-01	Detected
398	Female	28	2022-06-01	Detected
399	Female	65	2022-06-01	Detected
400	Male	25	2022-06-01	Detected
401	Female	59	2022-06-01	Detected
402	Male	67	2022-06-01	Detected
403	Male	45	2022-06-01	Detected
404	Male	55	2022-06-01	Detected
405	Female	44	2022-06-01	Detected
406	Female	29	2022-06-01	Detected
407	Female	31	2022-06-01	Detected
408	Female	42	2022-06-01	Detected
409	Female	56	2022-06-01	Detected
410	Female	78	2022-06-01	Detected
411	Male	74	2022-06-01	Detected
412	Female	50	2022-06-01	Detected
413	Female	60	2022-06-01	Detected
414	Male	66	2022-06-01	Detected
415	Male	54	2022-06-01	Detected
416	Female	65	2022-06-01	Detected
417	Female	37	2022-07-01	Detected
418	Male	24	2022-07-01	Detected
419	Female	50	2022-07-01	Detected
420	Female	44	2022-07-01	Detected
421	Female	20	2022-07-01	Detected
422	Female	46	2022-07-01	Detected
423	Male	22	2022-07-01	Detected
424	Male	24	2022-07-01	Detected
425	Male	36	2022-07-01	Detected
426	Male	46	2022-07-01	Detected
427	Female	57	2022-07-01	Detected
428	Female	60	2022-07-01	Detected
429	Male	28	2022-07-01	Detected
430	Female	34	2022-07-01	Detected
431	Female	41	2022-07-01	Detected
432	Male	80	2022-07-01	Detected
433	Male	65	2022-07-01	Detected
434	Female	78	2022-07-01	Detected
435	Female	61	2022-07-01	Detected
436	Male	36	2022-07-01	Detected
437	Male	43	2022-07-01	Detected
438	Male	64	2022-07-01	Detected
439	Female	23	2022-07-01	Detected
440	Male	31	2022-07-01	Detected
441	Male	32	2022-07-01	Detected
442	Female	22	2022-07-01	Detected
443	Male	38	2022-07-01	Detected
444	Male	62	2022-07-01	Detected
445	Male	69	2022-07-01	Detected
446	Female	30	2022-08-01	Detected
447	Female	23	2022-08-01	Detected
448	Female	27	2022-08-01	Detected
449	Female	27	2022-08-01	Detected
450	Female	35	2022-08-01	Detected
451	Female	51	2022-08-01	Detected
452	Female	39	2022-08-01	Detected
453	Female	49	2022-08-01	Detected
454	Male	50	2022-08-01	Detected
455	Male	30	2022-08-01	Detected
456	Male	47	2022-08-01	Detected
457	Male	36	2022-08-01	Detected
458	Male	48	2022-08-01	Detected
459	Male	21	2022-08-01	Detected
460	Male	35	2022-08-01	Detected
461	Male	21	2022-08-01	Detected
462	Female	30	2022-08-01	Detected
463	Female	32	2022-08-01	Detected
464	Female	23	2022-08-01	Detected
465	Female	24	2022-08-01	Detected
466	Female	40	2022-08-01	Detected
467	Female	33	2022-08-01	Detected
468	Female	64	2022-08-01	Detected
469	Female	52	2022-08-01	Detected
470	Female	29	2022-08-01	Detected
471	Male	44	2022-08-01	Detected
472	Male	75	2022-08-01	Detected
473	Female	28	2022-08-01	Detected
474	Male	36	2022-08-01	Detected
475	Female	69	2022-08-01	Detected
476	Male	36	2022-08-01	Detected
477	Male	35	2022-08-01	Detected
478	Male	65	2022-08-01	Detected
479	Male	52	2022-08-01	Detected
480	Female	52	2022-08-01	Detected
481	Female	38	2022-08-01	Detected
482	Male	33	2022-08-01	Detected
483	Female	34	2022-08-01	Detected
484	Male	60	2022-08-01	Detected
485	Female	20	2022-08-01	Detected
486	Male	24	2022-09-01	Detected
487	Female	48	2022-10-01	Detected
488	Male	36	2022-10-01	Detected
489	Male	40	2022-10-01	Detected
490	Male	45	2022-10-01	Detected

## Sheet: 251 participants
Participation ID	Code_Gender	Gender	Age (Y)	Weight (Kg)	Height (cm)	Code_Blood group	Blood group	Code_Comorbidity	Comorbidity disease (can select more than 1 option)	A6.1_Hypertension	A6.2_DM	A6.3_Heart Dz.	A6.4_Stroke	A6.5_Hyperthyroid	A6.6_ Ashma	A6.7_Cancer	A6.8_Dyslipidemia	A6.9_others	A6.9_Specify	Code_Time of COVID-19 disease	Time of COVID-19 disease	Code_ First COVID-19 infection	First COVID-19 infection	Code_ Infection during pregnant	Infection during pregnant	Code_Disease severity	Disease severity	Code_No. of Drugs for treatment	Drugs for treatment	C1.1_Andrographis	C1.2_ Favipiravir	C1.3_ Molnupiravir	C1.4_ Symptomatic drugs	C1.5_Others	C1.5_Specify	Code_No. of vaccination	No. of vaccination	1st dose vccinationa	2nd dose vccinationa	3rd dose vccinationa	4th dose vccinationa	5th dose vccinationa	Code_ lastest vaccine type	Code_Presence of Long Covid	D4.1_Nervous	D4.2_Skin	D4.3_Respiratory	D4.4_cardiovascular	D4.5_Mental
	Male=1 Female=2					A=1 B=2 AB=3 O=4 N/A=5		Yes=1 No=0		Yes=1 No=0	Yes=1 No=0	Yes=1 No=0	Yes=1 No=0	Yes=1 No=0	Yes=1 No=0	Yes=1 No=0	Yes=1 No=0	Yes=1 No=0	Specify other diseases	July- November 2022=1 December 2022-August 2023=2		Yes=1 No=0		Yes=1 No=2 990=Male		Mild=1 Moderate=2 Severe=3		1= 0 2= 1-2 3= >/=3		Yes=1 No=0	Yes=1 No=0	Yes=1 No=0	Yes=1 No=0	Yes=1 No=0	Specify other drugs	1= 0 2= 1-2 3= >/=3							0=unvaccinated 1= Inactivated 2= viral vector 3= mRNA	Yes=1 No=2	Yes=1 No=0	Yes=1 No=0	Yes=1 No=0	Yes=1 No=0	Yes=1 No=0
1	2	Female	30	56	165	4	O	0	No comorbidity	0	0	0	0	0	0	0	0	0	0	2	December 2022-August 2023	1	Yes	2	No	1	Mild	2	Flavipiravir	0	1	0	0	0	0	3	≥ 3	Pfizer	Pfizer	Pfizer	N/A	N/A	3	1	0	0	1	0	0
2	1	Male	36	80	180	4	O	1	Hypertension	1	0	0	0	0	0	0	0	0	0	1	July- November 2022	1	Yes	990		1	Mild	2	Flavipiravir	0	1	0	0	0	0	1	0	N/A	N/A	N/A	N/A	N/A	0	2	0	0	0	0	0
3	1	Male	28	65	170	1	A	0	No comorbidity	0	0	0	0	0	0	0	0	0	0	1	July- November 2022	1	Yes	2	No	1	Mild	2	symptomatic medicines	0	0	0	1	0	0	1	0	N/A	N/A	N/A	N/A	N/A	0	1	1	1	1	0	0
4	2	Female	34	78	164	3	AB	1	Hyperthyriod	0	0	0	0	1	0	0	0	0	0	1	July- November 2022	1	Yes	990		1	Mild	2	symptomatic medicines	0	0	0	1	0	0	1	0	N/A	N/A	N/A	N/A	N/A	0	1	0	0	0	0	0
5	1	Male	32	87	169	4	O	1	Hypertension	1	0	0	0	0	0	0	0	0	0	1	July- November 2022	1	Yes	2	No	3	Severe	2	Flavipiravir	0	1	0	0	0	0	1	0	N/A	N/A	N/A	N/A	N/A	0	1	1	1	1	0	1
6	2	Female	33	65	160	3	AB	1	DM	0	1	0	0	0	0	0	0	0	0	1	July- November 2022	1	Yes	2	No	1	Mild	2	symptomatic medicines	0	0	0	1	0	0	1	0	N/A	N/A	N/A	N/A	N/A	0	2	0	0	0	0	0
7	1	Male	29	70	174	2	B	0	No comorbidity	0	0	0	0	0	0	0	0	0	0	1	July- November 2022	1	Yes	2	No	1	Mild	2	symptomatic medicines	0	0	0	1	0	0	1	0	N/A	N/A	N/A	N/A	N/A	0	1	1	1	0	0	1
8	1	Male	31	64	165	2	B	0	No comorbidity	0	0	0	0	0	0	0	0	0	0	1	July- November 2022	1	Yes	2	No	3	Severe	2	Flavipiravir, steroid	0	1	0	0	1	steroid	1	0	N/A	N/A	N/A	N/A	N/A	0	1	0	1	0	0	0
9	1	Male	38	74	175	4	O	0	No comorbidity	0	0	0	0	0	0	0	0	0	0	1	July- November 2022	1	Yes	2	No	2	Moderate	2	Flavipiravir, steroid	0	1	0	0	1	steroid	1	0	N/A	N/A	N/A	N/A	N/A	0	1	0	1	0	0	0
10	2	Female	37	55	162	1	A	0	No comorbidity	0	0	0	0	0	0	0	0	0	0	2	December 2022-August 2023	1	Yes	2	No	1	Mild	2	Andrographis, symptomatic medicines	1	0	0	1	0	0	3	≥ 3	Sinovac	Sinovac	Pfizer	N/A	N/A	3	1	0	0	1	0	0
11	2	Female	23	58	170	1	A	0	No comorbidity	0	0	0	0	0	0	0	0	0	0	2	December 2022-August 2023	1	Yes	2	No	1	Mild	2	Molnupiravir	0	0	1	0	0	0	3	≥ 3	Sinovac	Sinovac	Pfizer	Pfizer	N/A	3	2	0	0	0	0	0
12	1	Male	21	68	190	4	O	1	Acute Rhinitis, Amblyopia with Vitreous Degeneration, Bilateral high frequency sensorineural hearing loss	0	0	0	0	0	0	0	0	1	Acute Rhinitis, Amblyopia with Vitreous Degeneration, Bilateral high frequency sensorineural hearing loss	1	July- November 2022	1	Yes	990		1	Mild	2	Andrographis, symptomatic medicines	1	0	0	1	0	0	1	0	N/A	N/A	N/A	N/A	N/A	0	1	0	0	1	0	0
13	1	Male	30	76	170	4	O	0	No comorbidity	0	0	0	0	0	0	0	0	0	0	1	July- November 2022	1	Yes	2	No	1	Mild	2	Flavipiravir	0	1	0	0	0	0	1	0	N/A	N/A	N/A	N/A	N/A	0	1	0	0	0	0	0
14	1	Male	35	73	168	4	O	0	No comorbidity	0	0	0	0	0	0	0	0	0	0	1	July- November 2022	1	Yes	2	No	3	Severe	2	symptomatic medicines	0	0	0	1	0	0	1	0	N/A	N/A	N/A	N/A	N/A	0	1	0	0	0	0	1
15	2	Female	37	67	155	1	A	0	No comorbidity	0	0	0	0	0	0	0	0	0	0	2	December 2022-August 2023	1	Yes	2	No	1	Mild	2	Molnupiravir	0	0	1	0	0	0	3	≥ 3	Sinovac	Sinovac	Pfizer	Pfizer	N/A	3	1	0	0	1	0	0
16	1	Male	33	72	164	4	O	0	No comorbidity	0	0	0	0	0	0	0	0	0	0	1	July- November 2022	1	Yes	2	No	1	Mild	2	Flavipiravir	0	1	0	0	0	0	1	0	N/A	N/A	N/A	N/A	N/A	0	1	0	0	0	0	1
17	2	Female	50	61	156	1	A	1	Pulmonary edema	0	0	0	0	0	0	0	0	1	Pulmonary edema	2	December 2022-August 2023	1	Yes	2	No	1	Mild	2	Flavipiravir	0	1	0	0	0	0	3	≥ 3	Sinovac	Sinovac	Pfizer	Pfizer	N/A	3	2	0	0	0	0	0
18	1	Male	43	60	167	1	A	0	No comorbidity	0	0	0	0	0	0	0	0	0	0	2	December 2022-August 2023	1	Yes	990		1	Mild	2	symptomatic medicines	0	0	0	1	0	0	1	0	N/A	N/A	N/A	N/A	N/A	0	1	0	0	1	0	1
19	1	Male	24	58	170	4	O	0	No comorbidity	0	0	0	0	0	0	0	0	0	0	2	December 2022-August 2023	1	Yes	990	No	1	Mild	2	symptomatic medicines	0	0	0	1	0	0	1	0	N/A	N/A	N/A	N/A	N/A	0	1	0	0	1	1	0
20	2	Female	27	65	168	4	O	0	No comorbidity	0	0	0	0	0	0	0	0	0	0	2	December 2022-August 2023	1	Yes	2	No	1	Mild	2	Flavipiravir	0	1	0	0	0	0	3	≥ 3	Sinovac	Sinovac	Pfizer	Pfizer	N/A	3	2	0	0	0	0	0
21	2	Female	27	70	165	1	A	0	No comorbidity	0	0	0	0	0	0	0	0	0	0	2	December 2022-August 2023	1	Yes	2	No	1	Mild	2	Flavipiravir	0	1	0	0	0	0	3	≥ 3	Sinovac	Sinovac	Pfizer	Pfizer	N/A	3	1	0	0	1	0	0
22	1	Male	19	55	162	5	N/A	0	No comorbidity	0	0	0	0	0	0	0	0	0	0	1	July- November 2022	1	Yes	2	No	1	Mild	2	Flavipiravir	0	1	0	0	0	0	1	0	N/A	N/A	N/A	N/A	N/A	0	2	0	0	0	0	0
23	2	Female	35	56	170	1	A	0	No comorbidity	0	0	0	0	0	0	0	0	0	0	2	December 2022-August 2023	1	Yes	2	No	1	Mild	2	Flavipiravir	0	1	0	0	0	0	3	≥ 3	Sinovac	Sinovac	Pfizer	Moderna	N/A	3	1	0	0	1	1	0
24	1	Male	44	77	165	5	N/A	0	No comorbidity	0	0	0	0	0	0	0	0	0	0	2	December 2022-August 2023	1	Yes	2	No	2	Moderate	2	symptomatic medicines	0	0	0	1	0	0	1	0	N/A	N/A	N/A	N/A	N/A	0	1	0	0	0	1	1
25	2	Female	51	60	150	5	N/A	0	No comorbidity	0	0	0	0	0	0	0	0	0	0	2	December 2022-August 2023	1	Yes	2	No	1	Mild	2	Flavipiravir, symptomatic medicines	0	1	0	1	0	0	3	≥ 3	Sinovac	Sinovac	Pfizer	Pfizer	N/A	3	1	0	0	1	0	0
26	1	Male	46	72	170	4	O	1	Hypertension, Gout	1	0	0	0	0	0	0	0	1	Gout	1	July- November 2022	1	Yes	990		1	Mild	2	Andrographis	1	0	0	0	0	0	1	0	N/A	N/A	N/A	N/A	N/A	0	2	0	0	0	0	0
27	2	Female	48	61	157	4	O	0	No comorbidity	0	0	0	0	0	0	0	0	0	0	2	December 2022-August 2023	1	Yes	2	No	1	Mild	2	Andrographis, symptomatic medicines	1	0	0	1	0	0	3	≥ 3	Sinopharm	Sinopharm	Moderna	Moderna	N/A	3	1	0	0	1	0	0
28	1	Male	25	70	170	4	O	0	No comorbidity	0	0	0	0	0	0	0	0	0	0	1	July- November 2022	1	Yes	990		3	Severe	2	steroid	0	0	0	0	1	steroid	1	0	N/A	N/A	N/A	N/A	N/A	0	1	1	1	1	0	0
29	1	Male	59	84	150	1	A	1	Hypertension	1	0	0	0	0	0	0	0	0	0	1	July- November 2022	1	Yes	2	No	1	Mild	2	Flavipiravir	0	1	0	0	0	0	1	0	N/A	N/A	N/A	N/A	N/A	0	2	0	0	0	0	0
30	1	Male	29	63	163	3	AB	0	No comorbidity	0	0	0	0	0	0	0	0	0	0	1	July- November 2022	1	Yes	990		1	Mild	2	Andrographis	1	0	0	0	0	0	1	0	N/A	N/A	N/A	N/A	N/A	0	1	0	0	1	0	0
31	2	Female	60	50	148	2	B	1	Hypertension	1	0	0	0	0	0	0	0	0	0	2	December 2022-August 2023	1	Yes	990		1	Mild	2	Flavipiravir	0	1	0	0	0	0	1	0	N/A	N/A	N/A	N/A	N/A	0	1	1	0	0	0	0
32	1	Male	36	80	175	2	B	1	Hypertension	1	0	0	0	0	0	0	0	0	0	1	July- November 2022	1	Yes	990		2	Moderate	2	Flavipiravir, steroid	0	1	0	0	1	steroid	1	0	N/A	N/A	N/A	N/A	N/A	0	1	1	0	1	0	0
33	2	Female	50	53	150	4	O	0	No comorbidity	0	0	0	0	0	0	0	0	0	0	2	December 2022-August 2023	1	Yes	2	No	1	Mild	2	Molnupiravir	0	0	1	0	0	0	3	≥ 3	Sinovac	Sinovac	Pfizer	Pfizer	N/A	3	2	0	0	0	0	0
34	2	Female	20	65	165	5	N/A	0	No comorbidity	0	0	0	0	0	0	0	0	0	0	2	December 2022-August 2023	1	Yes	2	No	1	Mild	2	Andrographis	1	0	0	0	0	0	3	≥ 3	AstraZeneca	AstraZeneca	Moderna	N/A	N/A	3	1	1	0	1	0	0
35	2	Female	51	72	158	5	N/A	0	No comorbidity	0	0	0	0	0	0	0	0	0	0	2	December 2022-August 2023	1	Yes	2	No	1	Mild	2	symptomatic medicines	0	0	0	1	0	0	3	≥ 3	Sinovac	Sinovac	Pfizer	Pfizer	N/A	3	1	0	0	1	0	0
36	2	Female	44	70	168	2	B	0	No comorbidity	0	0	0	0	0	0	0	0	0	0	2	December 2022-August 2023	1	Yes	2	No	1	Mild	2	Flavipiravir	0	1	0	0	0	0	3	≥ 3	Sinovac	Sinovac	Pfizer	Pfizer	N/A	3	2	0	0	0	0	0
37	1	Male	40	80	160	1	A	1	Hypertension	1	0	0	0	0	0	0	0	0	0	1	July- November 2022	1	Yes	990		1	Mild	2	symptomatic medicines	0	0	0	1	0	0	1	0	N/A	N/A	N/A	N/A	N/A	0	2	0	0	0	0	0
38	2	Female	20	53	161	2	B	0	No comorbidity	0	0	0	0	0	0	0	0	0	0	2	December 2022-August 2023	1	Yes	2	No	1	Mild	2	Molnupiravir	0	0	1	1	0	0	3	≥ 3	Sinopharm	Sinopharm	Moderna	N/A	N/A	3	1	1	1	0	0	1
39	2	Female	29	62	153	2	B	0	No comorbidity	0	0	0	0	0	0	0	0	0	0	1	July- November 2022	1	Yes	2	No	2	Moderate	2	Andrographis, symptomatic medicines	1	0	0	1	0	0	3	≥ 3	Sinovac	Sinovac	AstraZeneca	N/A	N/A	2	1	0	0	1	0	0
40	1	Male	51	78	164	5	N/A	0	No comorbidity	0	0	0	0	0	0	0	0	0	0	2	December 2022-August 2023	1	Yes	2	No	1	Mild	2	Flavipiravir	0	1	0	0	0	0	3	≥ 3	Sinovac	Sinovac	Pfizer	Pfizer	N/A	3	2	0	0	0	0	0
41	1	Male	38	75	165	4	O	1	DM	0	1	0	0	0	0	0	0	0	0	1	July- November 2022	1	Yes	2	No	1	Mild	2	Flavipiravir	0	1	0	0	0	0	1	0	N/A	N/A	N/A	N/A	N/A	0	1	0	0	1	0	0
42	2	Female	46	65	167	5	N/A	0	No comorbidity	0	0	0	0	0	0	0	0	0	0	2	December 2022-August 2023	1	Yes	2	No	1	Mild	2	Flavipiravir	0	1	0	0	0	0	3	≥ 3	Sinovac	Sinovac	Pfizer	Pfizer	N/A	3	1	0	0	1	0	0
43	1	Male	64	63	171	3	AB	0	No comorbidity	0	0	0	0	0	0	0	0	0	0	2	December 2022-August 2023	1	Yes	2	No	1	Mild	2	Flavipiravir	0	1	0	0	0	0	3	≥ 3	Sinovac	Sinovac	AstraZeneca	Pfizer	N/A	3	1	0	0	1	1	0
44	1	Male	38	53	175	3	AB	0	No comorbidity	0	0	0	0	0	0	0	0	0	0	2	December 2022-August 2023	1	Yes	2	No	1	Mild	2	Flavipiravir	0	1	0	0	0	0	3	≥ 3	Sinovac	Sinovac	AstraZeneca	Moderna	N/A	3	2	0	0	0	0	0
45	2	Female	33	45	165	5	N/A	0	No comorbidity	0	0	0	0	0	0	0	0	0	0	2	December 2022-August 2023	1	Yes	2	No	2	Moderate	2	Flavipiravir	0	1	0	0	0	0	3	≥ 3	Sinovac	Sinovac	Pfizer	Pfizer	N/A	3	1	0	1	1	0	0
46	2	Female	19	39	155	4	O	0	No comorbidity	0	0	0	0	0	0	0	0	0	0	2	December 2022-August 2023	1	Yes	990		1	Mild	2	Andrographis	1	0	0	0	0	0	2	1-2	AstraZeneca	AstraZeneca	N/A	N/A	N/A	2	1	1	1	0	0	0
47	1	Male	22	55	170	5	N/A	0	No comorbidity	0	0	0	0	0	0	0	0	0	0	1	July- November 2022	1	Yes	2	No	1	Mild	2	Molnupiravir, symptomatic medicines	0	0	1	0	0	0	3	≥ 3	Sinovac	Sinovac	Pfizer	Pfizer	N/A	3	1	1	1	1	1	0
48	1	Male	66	60	159	2	B	1	Hypertension, heart disease, Dyslipidemia, Colon cancer	1	0	1	0	0	0	1	1	0	0	1	July- November 2022	1	Yes	990		3	Severe	2	symptomatic medicines	0	0	0	1	0	0	1	0	N/A	N/A	N/A	N/A	N/A	0	1	0	1	0	0	1
49	2	Female	36	65	158	1	A	0	No comorbidity	0	0	0	0	0	0	0	0	0	0	2	December 2022-August 2023	1	Yes	990		1	Mild	2	Flavipiravir	0	1	0	0	0	0	2	1-2	AstraZeneca	AstraZeneca	N/A	N/A	N/A	2	1	0	0	1	0	0
50	1	Male	51	68	164	1	A	0	No comorbidity	0	0	0	0	0	0	0	0	0	0	2	December 2022-August 2023	1	Yes	2	No	1	Mild	2	Flavipiravir	0	1	0	0	0	0	3	≥ 3	Sinovac	Sinovac	Pfizer	N/A	N/A	3	1	1	0	1	0	0
51	2	Female	50	62	157	4	O	0	No comorbidity	0	0	0	0	0	0	0	0	0	0	2	December 2022-August 2023	1	Yes	2	No	1	Mild	2	symptomatic medicines	0	0	0	1	0	0	2	1-2	Sinovac	Sinopharm	N/A	N/A	N/A	1	1	1	0	1	1	0
52	1	Male	73	80	162	5	N/A	1	Benign Prostatic Hyperplasia, Dyslipidemia, Emphysema	0	0	0	0	0	0	0	1	1	Benign Prostatic Hyperplasia, Emphysema	1	July- November 2022	1	Yes	2	No	2	Moderate	2	Flavipiravir	0	1	0	0	0	0	1	0	N/A	N/A	N/A	N/A	N/A	0	1	0	0	1	0	0
53	2	Female	36	70	168	5	N/A	0	No comorbidity	0	0	0	0	0	0	0	0	0	0	1	July- November 2022	1	Yes	990		1	Mild	2	Andrographis, symptomatic medicines	1	0	0	1	0	0	2	1-2	Sinovac	Sinovac	N/A	N/A	N/A	1	1	0	0	1	0	0
54	1	Male	24	72	172	5	N/A	0	No comorbidity	0	0	0	0	0	0	0	0	0	0	2	December 2022-August 2023	1	Yes	2	No	1	Mild	2	Andrographis, symptomatic medicines	1	0	0	1	0	0	3	≥ 3	Sinovac	Sinovac	Pfizer	N/A	N/A	3	1	0	1	1	0	0
55	2	Female	31	60	160	5	N/A	0	No comorbidity	0	0	0	0	0	0	0	0	0	0	1	July- November 2022	1	Yes	990		2	Moderate	2	Flavipiravir	0	1	0	0	0	0	2	1-2	Sinovac	N/A	N/A	N/A	N/A	1	1	1	1	1	0	0
56	2	Female	35	52	158	4	O	0	No comorbidity	0	0	0	0	0	0	0	0	0	0	1	July- November 2022	1	Yes	990		1	Mild	2	Andrographis, symptomatic medicines	1	0	0	1	0	0	2	1-2	Sinovac	N/A	N/A	N/A	N/A	1	2	0	0	0	0	0
57	2	Female	33	59	158	2	B	0	No comorbidity	0	0	0	0	0	0	0	0	0	0	1	July- November 2022	1	Yes	2	No	1	Mild	2	Flavipiravir	0	1	0	0	0	0	2	1-2	Sinovac	N/A	N/A	N/A	N/A	1	1	1	0	0	0	1
58	1	Male	38	84	179	5	N/A	0	No comorbidity	0	0	0	0	0	0	0	0	0	0	2	December 2022-August 2023	1	Yes	2	No	1	Mild	2	symptomatic medicines	0	0	0	1	0	0	3	≥ 3	Sinopharm	Sinopharm	Moderna	N/A	N/A	3	1	0	0	1	0	0
59	2	Female	18	65	162	2	B	1	Allery, thrombocytopenia	0	0	0	0	0	0	0	0	1	Allery, thrombocytopenia	2	December 2022-August 2023	1	Yes	2	No	1	Mild	2	Flavipiravir	0	1	0	0	0	0	2	1-2	AstraZeneca	AstraZeneca	N/A	N/A	N/A	2	2	0	0	0	0	0
60	1	Male	45	48	160	2	B	1	SLE	0	0	0	0	0	0	0	0	1	SLE	2	December 2022-August 2023	1	Yes	2	No	1	Mild	2	symptomatic medicines	0	0	0	1	0	0	2	1-2	Moderna	Moderna	N/A	N/A	N/A	3	1	0	1	1	0	0
61	2	Female	33	70	155	5	N/A	0	No comorbidity	0	0	0	0	0	0	0	0	0	0	1	July- November 2022	1	Yes	2	No	2	Moderate	2	Flavipiravir	0	1	0	0	0	0	2	1-2	Sinovac	N/A	N/A	N/A	N/A	1	1	1	0	1	1	0
62	2	Female	37	50	156	2	B	0	No comorbidity	0	0	0	0	0	0	0	0	0	0	2	December 2022-August 2023	1	Yes	2	No	1	Mild	2	Flavipiravir	0	1	0	0	0	0	2	1-2	Pfizer	N/A	N/A	N/A	N/A	3	1	0	0	1	0	0
63	1	Male	47	57	160	3	AB	0	No comorbidity	0	0	0	0	0	0	0	0	0	0	2	December 2022-August 2023	1	Yes	2	No	2	Moderate	2	Flavipiravir	0	1	0	0	0	0	3	≥ 3	Sinovac	Sinovac	Pfizer	N/A	N/A	3	1	0	0	1	0	0
64	1	Male	21	65	173	1	A	1	Ashma	0	0	0	0	0	1	0	0	0	0	2	December 2022-August 2023	1	Yes	2	No	2	Moderate	2	symptomatic medicines	0	0	0	1	0	0	2	1-2	Sinopharm	Sinopharm	N/A	N/A	N/A	1	1	0	0	1	0	0
65	2	Female	31	56	144	2	B	0	No comorbidity	0	0	0	0	0	0	0	0	0	0	2	December 2022-August 2023	1	Yes	2	No	1	Mild	2	symptomatic medicines	0	0	0	1	0	0	2	1-2	Moderna	N/A	N/A	N/A	N/A	3	1	0	0	1	0	0
66	2	Female	27	64	160	2	B	0	No comorbidity	0	0	0	0	0	0	0	0	0	0	2	December 2022-August 2023	1	Yes	2	No	1	Mild	2	Flavipiravir	0	1	0	0	0	0	2	1-2	Sinopharm	Sinopharm	N/A	N/A	N/A	1	2	0	0	0	0	0
67	2	Female	31	70	165	1	A	1	DM	0	1	0	0	0	0	0	0	0	0	1	July- November 2022	1	Yes	2	No	2	Moderate	2	Flavipiravir	0	1	0	0	0	0	1	0	N/A	N/A	N/A	N/A	N/A	0	2	0	0	0	0	0
68	1	Male	44	67	167	5	N/A	0	No comorbidity	0	0	0	0	0	0	0	0	0	0	1	July- November 2022	1	Yes	990		2	Moderate	2	Flavipiravir	0	1	0	0	0	0	3	≥ 3	Pfizer	Pfizer	Pfizer	N/A	N/A	3	1	1	0	1	0	0
69	1	Male	22	67	166	3	AB	0	No comorbidity	0	0	0	0	0	0	0	0	0	0	2	December 2022-August 2023	1	Yes	990		1	Mild	2	Flavipiravir	0	1	0	0	0	0	3	≥ 3	Sinovac	Sinovac	Pfizer	Pfizer	N/A	3	2	0	0	0	0	0
70	2	Female	43	69	160	1	A	0	No comorbidity	0	0	0	0	0	0	0	0	0	0	1	July- November 2022	1	Yes	990		2	Moderate	2	Flavipiravir	0	1	0	0	0	0	2	1-2	Sinovac	N/A	N/A	N/A	N/A	1	2	0	0	0	0	0
71	2	Female	42	78	150	2	B	0	No comorbidity	0	0	0	0	0	0	0	0	0	0	2	December 2022-August 2023	1	Yes	990		1	Mild	2	symptomatic medicines	0	0	0	1	0	0	2	1-2	Sinovac	AstraZeneca	N/A	N/A	N/A	2	1	0	0	1	0	0
72	1	Male	24	50	175	4	O	0	No comorbidity	0	0	0	0	0	0	0	0	0	0	2	December 2022-August 2023	1	Yes	2	No	1	Mild	2	Flavipiravir	0	1	0	0	0	0	3	≥ 3	Sinovac	Sinovac	AstraZeneca	N/A	N/A	2	2	0	0	0	0	0
73	2	Female	30	50	165	4	O	0	No comorbidity	0	0	0	0	0	0	0	0	0	0	2	December 2022-August 2023	1	Yes	2	No	1	Mild	2	symptomatic medicines	0	0	0	1	0	0	2	1-2	Sinovac	AstraZeneca	N/A	N/A	N/A	2	2	0	0	0	0	0
74	1	Male	25	95	175	5	N/A	0	No comorbidity	0	0	0	0	0	0	0	0	0	0	2	December 2022-August 2023	1	Yes	2	No	1	Mild	2	symptomatic medicines	0	0	0	1	0	0	3	≥ 3	AstraZeneca	AstraZeneca	Pfizer	N/A	N/A	3	1	1	1	1	1	0
75	2	Female	39	70	158	1	A	0	No comorbidity	0	0	0	0	0	0	0	0	0	0	2	December 2022-August 2023	1	Yes	2	No	1	Mild	2	Andrographis, symptomatic medicines	1	0	0	1	0	0	2	1-2	Sinovac	AstraZeneca	N/A	N/A	N/A	2	1	1	1	1	1	0
76	2	Female	36	60	159	4	O	0	No comorbidity	0	0	0	0	0	0	0	0	0	0	2	December 2022-August 2023	1	Yes	990	No	1	Mild	2	symptomatic medicines	0	0	0	1	0	0	2	1-2	AstraZeneca	AstraZeneca	N/A	N/A	N/A	2	1	0	0	1	0	0
77	1	Male	40	-	163	3	AB	0	No comorbidity	0	0	0	0	0	0	0	0	0	0	2	December 2022-August 2023	1	Yes	990		1	Mild	2	symptomatic medicines	0	0	0	1	0	0	3	≥ 3	Sinovac	Sinovac	AstraZeneca	N/A	N/A	2	1	1	0	1	0	0
78	1	Male	20	60	172	5	N/A	0	No comorbidity	0	0	0	0	0	0	0	0	0	0	2	December 2022-August 2023	1	Yes	2	No	1	Mild	2	Flavipiravir	0	1	0	0	0	0	3	≥ 3	Sinovac	Sinovac	AstraZeneca	N/A	N/A	2	2	0	0	0	0	0
79	2	Female	28	45	160	4	O	0	No comorbidity	0	0	0	0	0	0	0	0	0	0	2	December 2022-August 2023	1	Yes	2	No	1	Mild	2	Andrographis, symptomatic medicines	1	0	0	1	0	0	2	1-2	Sinopharm	Sinovac	N/A	N/A	N/A	1	1	0	0	1	0	0
80	2	Female	31	61	157	4	O	1	Hyperthyriod	0	0	0	0	1	0	0	0	0	0	2	December 2022-August 2023	1	Yes	2	No	1	Mild	2	Flavipiravir	0	1	0	0	0	0	2	1-2	Pfizer	Pfizer	N/A	N/A	N/A	3	1	1	1	1	0	0
81	2	Female	39	55	160	2	B	0	No comorbidity	0	0	0	0	0	0	0	0	0	0	2	December 2022-August 2023	1	Yes	990		1	Mild	2	Flavipiravir, symptomatic medicines	0	1	0	1	0	0	2	1-2	Sinovac	Sinopharm	N/A	N/A	N/A	1	1	0	0	1	0	0
82	2	Female	31	54	151	4	O	1	Allery	0	0	0	0	0	0	0	0	1	Allery	1	July- November 2022	1	Yes	2	No	1	Mild	2	Flavipiravir	0	1	0	0	0	0	3	≥ 3	AstraZeneca	AstraZeneca	AstraZeneca	AstraZeneca	N/A	2	1	1	0	0	0	0
83	2	Female	46	70	165	5	N/A	1	Hypertension	1	0	0	0	0	0	0	0	0	0	1	July- November 2022	1	Yes	990		2	Moderate	2	Flavipiravir	0	1	0	0	0	0	1	0	N/A	N/A	N/A	N/A	N/A	0	2	0	0	0	0	0
84	2	Female	49	156		2	B	0	No comorbidity	0	0	0	0	0	0	0	0	0	0	2	December 2022-August 2023	1	Yes	990		2	Moderate	2	symptomatic medicines	0	0	0	1	0	0	2	1-2	Sinovac	AstraZeneca	N/A	N/A	N/A	2	2	0	0	0	0	0
85	1	Male	24	62	170	4	O	0	No comorbidity	0	0	0	0	0	0	0	0	0	0	2	December 2022-August 2023	1	Yes	2	No	1	Mild	2	Flavipiravir	0	1	0	0	0	0	3	≥ 3	Sinovac	AstraZeneca	Pfizer	N/A	N/A	3	1	1	1	0	1	1
86	1	Male	40	75	173	5	N/A	1	Sinusitis	0	0	0	0	0	0	0	0	1	Sinusitis	1	July- November 2022	1	Yes	990		1	Mild	2	Flavipiravir	0	1	0	0	0	0	1	0	N/A	N/A	N/A	N/A	N/A	0	2	0	0	0	0	0
87	2	Female	47	60	156	2	B	0	No comorbidity	0	0	0	0	0	0	0	0	0	0	1	July- November 2022	1	Yes	990		1	Mild	2	Flavipiravir	0	1	0	0	0	0	2	1-2	Sinopharm	N/A	N/A	N/A	N/A	1	2	0	0	0	0	0
88	2	Female	47	59	155	3	AB	0	No comorbidity	0	0	0	0	0	0	0	0	0	0	1	July- November 2022	1	Yes	990		2	Moderate	2	Flavipiravir	0	1	0	0	0	0	2	1-2	Sinopharm	N/A	N/A	N/A	N/A	1	1	1	0	1	0	0
89	1	Male	34	70	163	4	O	0	No comorbidity	0	0	0	0	0	0	0	0	0	0	2	December 2022-August 2023	1	Yes	2	No	1	Mild	2	Flavipiravir	0	1	0	0	0	0	3	≥ 3	Sinopharm	Sinopharm	Pfizer	N/A	N/A	3	1	1	0	0	0	0
90	2	Female	32	84	163	2	B	0	No comorbidity	0	0	0	0	0	0	0	0	0	0	2	December 2022-August 2023	1	Yes	2	No	1	Mild	2	symptomatic medicines	0	0	0	1	0	0	2	1-2	Sinovac	AstraZeneca	N/A	N/A	N/A	2	1	0	0	1	0	0
91	1	Male	60	63	167	4	O	0	No comorbidity	0	0	0	0	0	0	0	0	0	0	2	December 2022-August 2023	1	Yes	990		1	Mild	2	Flavipiravir	0	1	0	0	0	0	3	≥ 3	AstraZeneca	AstraZeneca	Pfizer	N/A	N/A	3	2	0	0	0	0	0
92	2	Female	48	55	167	3	AB	0	No comorbidity	0	0	0	0	0	0	0	0	0	0	2	December 2022-August 2023	1	Yes	990		1	Mild	2	Flavipiravir	0	1	0	0	0	0	2	1-2	Sinovac	AstraZeneca	N/A	N/A	N/A	2	1	0	0	1	0	0
93	1	Male	50	85	160	2	B	0	No comorbidity	0	0	0	0	0	0	0	0	0	0	2	December 2022-August 2023	1	Yes	990		1	Mild	2	symptomatic medicines	0	0	0	1	0	0	3	≥ 3	Sinovac	AstraZeneca	Moderna	N/A	N/A	3	2	0	0	0	0	0
94	1	Male	36	65	160	4	O	0	No comorbidity	0	0	0	0	0	0	0	0	0	0	2	December 2022-August 2023	1	Yes	2	No	1	Mild	2	Molnupiravir	0	0	1	0	0	0	3	≥ 3	Sinovac	Sinovac	Pfizer	Pfizer	N/A	3	2	0	0	0	0	0
95	1	Male	20	49	162	2	B	0	No comorbidity	0	0	0	0	0	0	0	0	0	0	2	December 2022-August 2023	1	Yes	990		1	Mild	2	Flavipiravir	0	1	0	0	0	0	3	≥ 3	Sinovac	Sinovac	AstraZeneca	N/A	N/A	2	2	0	0	0	0	0
96	2	Female	48	60	160	2	B	1	Allery, thalassemia	0	0	0	0	0	0	0	0	0	Allery, thalassemia	1	July- November 2022	1	Yes	2	No	2	Moderate	2	Flavipiravir	0	1	0	0	0	0	1	0	N/A	N/A	N/A	N/A	N/A	0	1	1	1	1	1	1
97	2	Female	32	53	167	2	B	0	No comorbidity	0	0	0	0	0	0	0	0	0	0	2	December 2022-August 2023	1	Yes	2	No	1	Mild	2	symptomatic medicines	0	0	0	1	0	0	2	1-2	Sinopharm	Sinopharm	N/A	N/A	N/A	1	1	0	1	0	0	1
98	1	Male	20	74	174	5	N/A	0	No comorbidity	0	0	0	0	0	0	0	0	0	0	2	December 2022-August 2023	1	Yes	2	No	1	Mild	2	Andrographis, symptomatic medicines	1	0	0	1	0	0	3	≥ 3	Sinovac	Sinovac	Pfizer	N/A	N/A	3	1	1	0	1	0	0
99	1	Male	30	68	167	4	O	0	No comorbidity	0	0	0	0	0	0	0	0	0	0	2	December 2022-August 2023	1	Yes	2	No	1	Mild	2	Flavipiravir	0	1	0	0	0	0	3	≥ 3	Sinovac	Sinovac	Pfizer	Pfizer	N/A	3	1	0	0	1	0	0
100	1	Male	45	80	175	3	AB	1	DM	0	1	0	0	0	0	0	0	0	0	1	July- November 2022	1	Yes	2	No	1	Mild	2	Flavipiravir	0	1	0	0	0	0	1	0	N/A	N/A	N/A	N/A	N/A	0	1	0	0	1	0	0
101	2	Female	28	82	170	4	O	1	Thalassemia	0	0	0	0	0	0	0	0	1	Thalassemia	1	July- November 2022	1	Yes	2	No	1	Mild	2	Andrographis, symptomatic medicines	1	0	0	1	0	0	1	0	N/A	N/A	N/A	N/A	N/A	0	1	0	1	0	0	0
102	1	Male	25	66	175	4	O	1	Allery	0	0	0	0	0	0	0	0	1	Allery	1	July- November 2022	1	Yes	990	No	2	Moderate	2	Flavipiravir, steroid	0	1	0	0	1	steroid	1	0	N/A	N/A	N/A	N/A	N/A	0	1	0	0	1	1	1
103	2	Female	47	78	155	5	N/A	0	No comorbidity	0	0	0	0	0	0	0	0	0	0	1	July- November 2022	1	Yes	2	No	1	Mild	2	symptomatic medicines	0	0	0	1	0	0	2	1-2	AstraZeneca	N/A	N/A	N/A	N/A	2	1	0	0	1	1	1
104	1	Male	29	63	165	1	A	0	No comorbidity	0	0	0	0	0	0	0	0	0	0	2	December 2022-August 2023	1	Yes	2	No	1	Mild	2	Flavipiravir, CPM	0	1	0	0	1	CMP	3	≥ 3	Sinovac	Sinovac	AstraZeneca	Pfizer	N/A	3	1	0	1	0	0	0
105	1	Male	47	75	170	5	N/A	0	No comorbidity	0	0	0	0	0	0	0	0	0	0	2	December 2022-August 2023	1	Yes	2	No	1	Mild	2	Flavipiravir, symptomatic medicines	0	1	0	1	0	0	3	≥ 3	Sinovac	Sinovac	AstraZeneca	Moderna	N/A	3	1	0	1	1	0	0
106	1	Male	30	68	175	5	N/A	0	No comorbidity	0	0	0	0	0	0	0	0	0	0	2	December 2022-August 2023	1	Yes	990		1	Mild	2	Andrographis	1	0	0	0	1	เม็ดฟู่	3	≥ 3	Sinovac	Sinovac	Moderna	N/A	N/A	3	1	0	0	1	0	0
107	1	Male	19	-	171	4	O	0	No comorbidity	0	0	0	0	0	0	0	0	0	0	2	December 2022-August 2023	1	Yes	990		1	Mild	2	Flavipiravir	0	1	0	0	0	0	3	≥ 3	Sinovac	Sinovac	Pfizer	Pfizer	N/A	3	2	0	0	0	0	0
108	2	Female	46	62	151	5	N/A	1	DM	0	1	0	0	0	0	0	0	0	0	2	December 2022-August 2023	1	Yes	2	No	1	Mild	2	symptomatic medicines	0	0	0	1	0	0	1	0	N/A	N/A	N/A	N/A	N/A	0	1	0	1	0	0	0
109	1	Male	48	70	165	4	O	0	No comorbidity	0	0	0	0	0	0	0	0	0	0	2	December 2022-August 2023	1	Yes	990	No	1	Mild	2	symptomatic medicines	0	0	0	1	0	0	3	≥ 3	Sinovac	Sinovac	AstraZeneca	N/A	N/A	2	1	1	0	1	0	0
110	2	Female	59	80	168	1	A	1	Heart disease	0	0	1	0	0	0	0	0	0	0	2	December 2022-August 2023	1	Yes	1	ใช่	1	Mild	2	symptomatic medicines	0	0	0	1	0	0	2	1-2	AstraZeneca	N/A	N/A	N/A	N/A	2	2	0	0	0	0	0
111	2	Female	25	42	153	1	A	0	No comorbidity	0	0	0	0	0	0	0	0	0	0	2	December 2022-August 2023	1	Yes	2	No	2	Moderate	2	symptomatic medicines	0	0	0	1	0	0	2	1-2	Pfizer	Pfizer	N/A	N/A	N/A	3	1	0	0	1	0	0
112	1	Male	41	61	165	2	B	0	No comorbidity	0	0	0	0	0	0	0	0	0	0	2	December 2022-August 2023	1	Yes	2	No	1	Mild	2	Flavipiravir	0	1	0	0	0	0	3	≥ 3	Sinovac	AstraZeneca	AstraZeneca	N/A	N/A	2	1	0	0	1	0	0
113	2	Female	20	60	163	1	A	0	No comorbidity	0	0	0	0	0	0	0	0	0	0	2	December 2022-August 2023	1	Yes	990		1	Mild	2	symptomatic medicines	0	0	0	1	0	0	3	≥ 3	Sinovac	Sinovac	AstraZeneca	Pfizer	N/A	3	1	1	0	0	0	0
114	2	Female	38	65	155	4	O	0	No comorbidity	0	0	0	0	0	0	0	0	0	0	2	December 2022-August 2023	1	Yes	990		1	Mild	2	Andrographis	1	0	0	0	0	0	3	≥ 3	Sinovac	Sinovac	AstraZeneca	Pfizer	Pfizer	3	2	0	0	0	0	0
115	1	Male	39	70	160	4	O	0	No comorbidity	0	0	0	0	0	0	0	0	0	0	2	December 2022-August 2023	1	Yes	990		1	Mild	2	Andrographis, symptomatic medicines	1	0	0	1	0	0	3	≥ 3	Sinovac	Sinovac	AstraZeneca	N/A	N/A	2	1	0	0	1	0	0
116	2	Female	51	60	155	5	N/A	0	No comorbidity	0	0	0	0	0	0	0	0	0	0	2	December 2022-August 2023	1	Yes	990		1	Mild	2	symptomatic medicines	0	0	0	1	0	0	3	≥ 3	Sinovac	AstraZeneca	Pfizer	N/A	N/A	3	2	0	0	0	0	0
117	1	Male	46	75	175	5	N/A	0	No comorbidity	0	0	0	0	0	0	0	0	0	0	2	December 2022-August 2023	1	Yes	990		1	Mild	2	Flavipiravir	0	1	0	0	0	0	3	≥ 3	Sinovac	Sinovac	AstraZeneca	Moderna	N/A	3	2	0	0	0	0	0
118	1	Male	59	52	160	5	N/A	0	No comorbidity	0	0	0	0	0	0	0	0	0	0	2	December 2022-August 2023	1	Yes	990		1	Mild	2	Andrographis, symptomatic medicines	1	0	0	1	0	0	3	≥ 3	AstraZeneca	AstraZeneca	Pfizer	N/A	N/A	3	1	0	0	1	0	0
119	2	Female	47	58	162	4	O	0	No comorbidity	0	0	0	0	0	0	0	0	0	0	2	December 2022-August 2023	1	Yes	990	No	1	Mild	2	Flavipiravir	0	1	0	0	0	0	2	1-2	Sinovac	AstraZeneca	N/A	N/A	N/A	2	1	0	1	0	0	0
120	1	Male	47	67	165	4	O	1	Hypertension	1	0	0	0	0	0	0	0	0	0	1	July- November 2022	1	Yes	990		1	Mild	2	symptomatic medicines	0	0	0	1	0	0	1	0	N/A	N/A	N/A	N/A	N/A	0	1	0	0	1	0	0
121	1	Male	23	80	179	3	AB	0	No comorbidity	0	0	0	0	0	0	0	0	0	0	2	December 2022-August 2023	1	Yes	990		1	Mild	2	Andrographis, symptomatic medicines	1	0	0	1	0	0	3	≥ 3	Sinovac	AstraZeneca	Pfizer	N/A	N/A	3	1	0	0	1	0	0
122	1	Male	56	74	170	5	N/A	1	DM	0	1	0	0	0	0	0	0	0	0	1	July- November 2022	1	Yes	2	No	1	Mild	2	symptomatic medicines	0	0	0	1	0	0	1	0	N/A	N/A	N/A	N/A	N/A	0	1	0	1	1	0	0
123	2	Female	38	43	150	2	B	1	Allery	0	0	0	0	0	0	0	0	1	Allery	1	July- November 2022	1	Yes	2	No	2	Moderate	2	Flavipiravir	0	1	0	0	0	0	1	0	N/A	N/A	N/A	N/A	N/A	0	1	0	1	1	0	0
124	1	Male	36	58	160	5	N/A	0	No comorbidity	0	0	0	0	0	0	0	0	0	0	2	December 2022-August 2023	1	Yes	990		1	Mild	2	Molnupiravir	0	0	1	0	0	0	3	≥ 3	AstraZeneca	Pfizer	Pfizer	Moderna	N/A	3	2	0	0	0	0	0
125	1	Male	32	70	157	5	N/A	0	No comorbidity	0	0	0	0	0	0	0	0	0	0	2	December 2022-August 2023	1	Yes	990		1	Mild	2	Flavipiravir	0	1	0	0	0	0	3	≥ 3	Pfizer	Pfizer	Moderna	N/A	N/A	3	1	0	0	1	0	0
126	1	Male	37	85	173	1	A	0	No comorbidity	0	0	0	0	0	0	0	0	0	0	2	December 2022-August 2023	1	Yes	990		1	Mild	2	Andrographis, symptomatic medicines	1	0	0	1	0	0	3	≥ 3	AstraZeneca	AstraZeneca	Moderna	N/A	N/A	3	2	0	0	0	0	0
127	2	Female	62	65	155	5	N/A	0	No comorbidity	0	0	0	0	0	0	0	0	0	0	1	July- November 2022	1	Yes	990		1	Mild	2	symptomatic medicines	0	0	0	1	0	0	2	1-2	Sinovac	N/A	N/A	N/A	N/A	1	2	0	0	0	0	0
128	1	Male	36	90	170	5	N/A	0	No comorbidity	0	0	0	0	0	0	0	0	0	0	2	December 2022-August 2023	1	Yes	990		1	Mild	2	Andrographis, symptomatic medicines	1	0	0	1	0	0	3	≥ 3	AstraZeneca	AstraZeneca	Pfizer	Pfizer	N/A	3	2	0	0	0	0	0
129	1	Male	48	72	165	5	N/A	0	No comorbidity	0	0	0	0	0	0	0	0	0	0	2	December 2022-August 2023	1	Yes	990		1	Mild	2	Flavipiravir	0	1	0	0	0	0	3	≥ 3	Sinovac	Sinovac	Pfizer	Pfizer	N/A	3	1	0	0	1	0	0
130	2	Female	28	68	157	4	O	0	No comorbidity	0	0	0	0	0	0	0	0	0	0	1	July- November 2022	1	Yes	990		2	Moderate	2	Flavipiravir	0	1	0	0	0	0	2	1-2	Sinovac	Sinovac	N/A	N/A	N/A	1	2	0	0	0	0	0
131	1	Male	64	85	180	2	B	1	Hypertension, Dyslipidemia	1	0	0	0	0	0	0	1	0	0	1	July- November 2022	1	Yes	990		1	Mild	2	Flavipiravir	0	1	0	0	0	0	1	0	N/A	N/A	N/A	N/A	N/A	0	2	0	0	0	0	0
132	1	Male	46	70	175	5	N/A	0	No comorbidity	0	0	0	0	0	0	0	0	0	0	2	December 2022-August 2023	1	Yes	990		1	Mild	2	symptomatic medicines	0	0	0	1	0	0	3	≥ 3	Sinovac	AstraZeneca	AstraZeneca	N/A	N/A	2	2	0	0	0	0	0
133	2	Female	18	43	155	4	O	0	No comorbidity	0	0	0	0	0	0	0	0	0	0	1	July- November 2022	1	Yes	990		1	Mild	2	Flavipiravir	0	1	0	0	0	0	2	1-2	AstraZeneca	N/A	N/A	N/A	N/A	2	2	0	0	0	0	0
134	2	Female	36	51	154	2	B	0	No comorbidity	0	0	0	0	0	0	0	0	0	0	1	July- November 2022	1	Yes	990		1	Mild	2	symptomatic medicines	0	0	0	1	0	0	2	1-2	Sinovac	Sinovac	N/A	N/A	N/A	1	1	0	0	0	0	1
135	2	Female	26	100	158	4	O	0	No comorbidity	0	0	0	0	0	0	0	0	0	0	1	July- November 2022	1	Yes	990		1	Mild	2	symptomatic medicines	0	0	0	1	0	0	2	1-2	Sinopharm	N/A	N/A	N/A	N/A	1	1	0	0	1	0	0
136	2	Female	57	65	152	1	A	1	Dyslipidemia	0	0	0	0	0	0	0	0	0	0	2	December 2022-August 2023	1	Yes	990		2	Moderate	2	Flavipiravir	0	1	0	0	0	0	1	0	N/A	N/A	N/A	N/A	N/A	0	1	0	0	1	0	1
137	2	Female	28	54	156	4	O	0	No comorbidity	0	0	0	0	0	0	0	0	0	0	1	July- November 2022	1	Yes	990		1	Mild	2	Flavipiravir	0	1	0	0	0	0	2	1-2	AstraZeneca	N/A	N/A	N/A	N/A	2	1	0	0	1	0	0
138	2	Female	33	100	162	2	B	0	No comorbidity	0	0	0	0	0	0	0	0	0	0	2	December 2022-August 2023	1	Yes	990		1	Mild	2	Andrographis	1	0	0	0	0	0	2	1-2	Sinovac	AstraZeneca	N/A	N/A	N/A	2	2	0	0	0	0	0
139	2	Female	44	63	152	4	O	0	No comorbidity	0	0	0	0	0	0	0	0	0	0	1	July- November 2022	1	Yes	990		1	Mild	2	symptomatic medicines	0	0	0	1	0	0	2	1-2	AstraZeneca	AstraZeneca	N/A	N/A	N/A	2	1	0	1	1	0	1
140	2	Female	61	71	150	5	N/A	1	Hypertension	1	0	0	0	0	0	0	0	0	0	1	July- November 2022	1	Yes	990		2	Moderate	2	Flavipiravir	0	1	0	0	0	0	1	0	N/A	N/A	N/A	N/A	N/A	0	1	0	0	1	0	0
141	2	Female	34	61	157	4	O	0	No comorbidity	0	0	0	0	0	0	0	0	0	0	1	July- November 2022	1	Yes	990		2	Moderate	2	Flavipiravir	0	1	0	0	0	0	2	1-2	Sinovac	N/A	N/A	N/A	N/A	1	1	0	0	1	0	0
142	2	Female	47	50	152	4	O	0	No comorbidity	0	0	0	0	0	0	0	0	0	0	1	July- November 2022	1	Yes	990		1	Mild	2	Flavipiravir	0	1	0	0	0	0	2	1-2	AstraZeneca	AstraZeneca	N/A	N/A	N/A	2	2	0	0	0	0	0
143	1	Male	21	68	174	5	N/A	0	No comorbidity	0	0	0	0	0	0	0	0	0	0	2	December 2022-August 2023	1	Yes	990		1	Mild	2	Molnupiravir	0	0	1	0	0	0	3	≥ 3	Sinovac	Sinovac	Pfizer	Pfizer	N/A	3	1	0	0	1	1	1
144	2	Female	20	62	158	3	AB	0	No comorbidity	0	0	0	0	0	0	0	0	0	0	1	July- November 2022	1	Yes	990		1	Mild	2	Flavipiravir	0	1	0	0	0	0	2	1-2	Sinovac	AstraZeneca	N/A	N/A	N/A	2	1	0	0	0	0	0
145	2	Female	57	84	145	5	N/A	1	Hypertension, DM, Dyslipidemia	1	1	0	0	0	0	0	1	0	0	1	July- November 2022	1	Yes	990		1	Mild	2	symptomatic medicines	0	0	0	1	0	0	1	0	N/A	N/A	N/A	N/A	N/A	0	2	0	0	0	0	0
146	1	Male	52	55	165	4	O	1	DM, Dyslipidemia	0	1	0	0	0	0	0	1	0	0	1	July- November 2022	1	Yes	990	No	2	Moderate	2	symptomatic medicines	0	0	0	1	0	0	1	0	N/A	N/A	N/A	N/A	N/A	0	1	0	1	0	1	0
147	2	Female	44	62	158	2	B	0	No comorbidity	0	0	0	0	0	0	0	0	0	0	1	July- November 2022	1	Yes	990		1	Mild	2	symptomatic medicines	0	0	0	1	0	0	2	1-2	Sinovac	AstraZeneca	N/A	N/A	N/A	2	2	0	0	0	0	0
148	2	Female	25	65	160	1	A	0	No comorbidity	0	0	0	0	0	0	0	0	0	0	1	July- November 2022	1	Yes	990		1	Mild	2	Flavipiravir	0	1	0	0	0	0	2	1-2	AstraZeneca	AstraZeneca	N/A	N/A	N/A	2	1	0	0	1	0	0
149	2	Female	26	65	165	5	N/A	0	No comorbidity	0	0	0	0	0	0	0	0	0	0	1	July- November 2022	1	Yes	990		1	Mild	2	symptomatic medicines	0	0	0	1	0	0	2	1-2	Moderna	Moderna	N/A	N/A	N/A	3	2	0	0	0	0	0
150	1	Male	40	72	159	3	AB	0	No comorbidity	0	0	0	0	0	0	0	0	0	0	2	December 2022-August 2023	1	Yes	990		1	Mild	2	Molnupiravir	0	0	1	0	0	0	3	≥ 3	Sinovac	Sinovac	Pfizer	Pfizer	N/A	3	1	0	0	1	1	1
151	2	Female	38	65	164	4	O	0	No comorbidity	0	0	0	0	0	0	0	0	0	0	1	July- November 2022	1	Yes	990		1	Mild	2	Flavipiravir	0	1	0	0	0	0	2	1-2	AstraZeneca	N/A	N/A	N/A	N/A	2	1	0	0	0	0	0
152	2	Female	26	100	165	1	A	0	No comorbidity	0	0	0	0	0	0	0	0	0	0	1	July- November 2022	1	Yes	990		1	Mild	2	Flavipiravir, symptomatic medicines	0	1	0	1	0	0	2	1-2	Sinovac	N/A	N/A	N/A	N/A	1	1	0	0	0	0	1
153	1	Male	18	58	171	4	O	0	No comorbidity	0	0	0	0	0	0	0	0	0	0	2	December 2022-August 2023	1	Yes	2	No	1	Mild	2	symptomatic medicines	0	0	0	1	0	0	3	≥ 3	Sinovac	Sinovac	Pfizer	Pfizer	N/A	3	1	0	0	1	0	0
154	2	Female	22	52	162	2	B	0	No comorbidity	0	0	0	0	0	0	0	0	0	0	2	December 2022-August 2023	1	Yes	990		1	Mild	2	Flavipiravir	0	1	0	0	0	0	2	1-2	Sinovac	Sinovac	N/A	N/A	N/A	1	1	1	0	1	0	0
155	2	Female	42	60	158	4	O	0	No comorbidity	0	0	0	0	0	0	0	0	0	0	2	December 2022-August 2023	1	Yes	990		1	Mild	2	Flavipiravir	0	1	0	0	0	0	2	1-2	Sinovac	AstraZeneca	N/A	N/A	N/A	2	1	1	0	1	0	0
156	1	Male	35	100	170	5	N/A	1	Ashma	0	0	0	0	0	1	0	0	0	0	2	December 2022-August 2023	1	Yes	990		1	Mild	2	Molnupiravir	0	0	1	0	0	0	3	≥ 3	Sinovac	Pfizer	Pfizer	N/A	N/A	3	2	0	0	0	0	0
157	2	Female	64	56	150	4	O	0	No comorbidity	0	0	0	0	0	0	0	0	0	0	2	December 2022-August 2023	1	Yes	990	No	1	Mild	2	Flavipiravir, symptomatic medicines	0	1	0	1	0	0	2	1-2	Pfizer	Pfizer	N/A	N/A	N/A	3	1	1	1	1	1	0
158	1	Male	24	50	169	3	AB	0	No comorbidity	0	0	0	0	0	0	0	0	0	0	2	December 2022-August 2023	1	Yes	2	No	1	Mild	2	Andrographis	1	0	0	0	0	0	3	≥ 3	Sinovac	Sinovac	AstraZeneca	Pfizer	Pfizer	3	1	0	0	1	0	1
159	2	Female	34	51	155	5	N/A	0	No comorbidity	0	0	0	0	0	0	0	0	0	0	2	December 2022-August 2023	1	Yes	990		1	Mild	2	symptomatic medicines	0	0	0	1	0	0	2	1-2	Sinovac	Sinovac	N/A	N/A	N/A	1	1	0	0	0	0	0
160	2	Female	32	85	158	3	AB	1	Hypertension	1	0	0	0	0	0	0	0	0	0	1	July- November 2022	1	Yes	990		2	Moderate	2	Flavipiravir	0	1	0	0	0	0	1	0	N/A	N/A	N/A	N/A	N/A	0	1	1	1	1	1	1
161	1	Male	25	70	170	4	O	0	No comorbidity	0	0	0	0	0	0	0	0	0	0	2	December 2022-August 2023	1	Yes	2	No	1	Mild	2	symptomatic medicines	0	0	0	1	0	0	3	≥ 3	Sinovac	AstraZeneca	N/A	N/A	N/A	2	1	0	0	1	0	0
162	1	Male	21	54	178	5	N/A	0	No comorbidity	0	0	0	0	0	0	0	0	0	0	2	December 2022-August 2023	1	Yes	2	No	1	Mild	2	symptomatic medicines	0	0	0	1	0	0	3	≥ 3	Sinovac	Sinovac	AstraZeneca	N/A	N/A	2	2	0	0	0	0	0
163	2	Female	42	54	160	3	AB	0	No comorbidity	0	0	0	0	0	0	0	0	0	0	2	December 2022-August 2023	1	Yes	990		1	Mild	2	symptomatic medicines	0	0	0	1	0	0	2	1-2	Sinovac	AstraZeneca	N/A	N/A	N/A	2	1	0	0	1	0	0
164	2	Female	26	49	167	4	O	0	No comorbidity	0	0	0	0	0	0	0	0	0	0	2	December 2022-August 2023	1	Yes	990	No	1	Mild	2	symptomatic medicines	0	0	0	1	0	0	2	1-2	Sinovac	Sinovac	N/A	N/A	N/A	1	1	0	0	1	1	1
165	2	Female	19	49	165	4	O	0	No comorbidity	0	0	0	0	0	0	0	0	0	0	2	December 2022-August 2023	1	Yes	990	No	1	Mild	2	Flavipiravir	0	1	0	0	0	0	2	1-2	Sinopharm	Sinopharm	N/A	N/A	N/A	1	1	0	1	0	0	0
166	1	Male	32	78	168	3	AB	0	No comorbidity	0	0	0	0	0	0	0	0	0	0	2	December 2022-August 2023	1	Yes	2	No	1	Mild	2	Andrographis, symptomatic medicines	1	0	0	1	0	0	3	≥ 3	Sinovac	Sinovac	AstraZeneca	N/A	N/A	2	2	0	0	0	0	0
167	2	Female	37	76	165	2	B	0	No comorbidity	0	0	0	0	0	0	0	0	0	0	2	December 2022-August 2023	1	Yes	990		1	Mild	2	Andrographis	1	0	0	0	0	0	2	1-2	Sinovac	AstraZeneca	N/A	N/A	N/A	2	2	0	0	0	0	0
168	2	Female	30	57	155	4	O	0	No comorbidity	0	0	0	0	0	0	0	0	0	0	2	December 2022-August 2023	1	Yes	990	No	1	Mild	2	Andrographis, symptomatic medicines	1	0	0	1	0	0	2	1-2	Sinovac	AstraZeneca	N/A	N/A	N/A	2	2	0	0	0	0	0
169	1	Male	20	53	165	5	N/A	0	No comorbidity	0	0	0	0	0	0	0	0	0	0	2	December 2022-August 2023	1	Yes	2	No	1	Mild	2	Flavipiravir	0	1	0	0	0	0	3	≥ 3	Sinovac	Pfizer	Pfizer	N/A	N/A	3	1	1	1	1	0	1
170	2	Female	45	62	160	5	N/A	1	Hypertension, DM	1	1	0	0	0	0	0	0	0	0	1	July- November 2022	1	Yes	990		1	Mild	2	Flavipiravir	0	1	0	0	0	0	1	0	N/A	N/A	N/A	N/A	N/A	0	1	0	0	0	0	0
171	2	Female	30	60	158	4	O	0	No comorbidity	0	0	0	0	0	0	0	0	0	0	2	December 2022-August 2023	1	Yes	990	No	1	Mild	2	symptomatic medicines	0	0	0	1	0	0	2	1-2	Sinovac	AstraZeneca	N/A	N/A	N/A	2	2	0	0	0	0	0
172	1	Male	37	125	162	4	O	0	No comorbidity	0	0	0	0	0	0	0	0	0	0	2	December 2022-August 2023	1	Yes	2	No	1	Mild	2	Andrographis, symptomatic medicines	1	0	0	1	0	0	3	≥ 3	Sinovac	AstraZeneca	Pfizer	N/A	N/A	3	1	0	0	1	0	0
173	2	Female	32	55	165	4	O	0	No comorbidity	0	0	0	0	0	0	0	0	0	0	2	December 2022-August 2023	1	Yes	990	No	1	Mild	2	Andrographis, symptomatic medicines	1	0	0	1	0	0	2	1-2	Sinovac	Pfizer	N/A	N/A	N/A	3	1	1	0	1	0	0
174	2	Female	26	65	153	2	B	0	No comorbidity	0	0	0	0	0	0	0	0	0	0	2	December 2022-August 2023	1	Yes	990		1	Mild	2	Flavipiravir	0	1	0	0	0	0	2	1-2	AstraZeneca	N/A	N/A	N/A	N/A	2	1	0	0	1	0	0
175	1	Male	62	78	172	4	O	1	Peptic ulcer	0	0	0	0	0	0	0	0	1	Peptic ulcer	2	December 2022-August 2023	1	Yes	990		1	Mild	2	Flavipiravir	0	1	0	0	0	0	1	0	N/A	N/A	N/A	N/A	N/A	0	1	1	0	1	0	0
176	2	Female	62	68	155	3	AB	1	Hypertension, DM	1	1	0	0	0	0	0	0	0	0	1	July- November 2022	1	Yes	990		1	Mild	2	Flavipiravir	0	1	0	0	0	0	1	0	N/A	N/A	N/A	N/A	N/A	0	1	0	0	1	0	0
177	2	Female	52	55	155	2	B	1	Hypertension, DM	1	1	0	0	0	0	0	0	0	0	1	July- November 2022	1	Yes	990		2	Moderate	2	Flavipiravir	0	1	0	0	0	0	1	0	N/A	N/A	N/A	N/A	N/A	0	2	0	0	0	0	0
178	1	Male	31	59	170	4	O	0	No comorbidity	0	0	0	0	0	0	0	0	0	0	2	December 2022-August 2023	1	Yes	2	No	1	Mild	2	Flavipiravir	0	1	0	0	0	0	3	≥ 3	Sinovac	Sinovac	Pfizer	N/A	N/A	3	1	0	0	1	0	0
179	2	Female	56	53	155	2	B	1	Hypertension, Dyslipidemia	1	0	0	0	0	0	0	1	0	0	1	July- November 2022	1	Yes	990		1	Mild	2	Flavipiravir	0	1	0	0	0	0	1	0	N/A	N/A	N/A	N/A	N/A	0	2	0	0	0	0	0
180	1	Male	59	65	143	5	N/A	1	Hypertension, Dyslipidemia	1	0	0	0	0	0	0	1	0	0	1	July- November 2022	1	Yes	990		1	Mild	2	Andrographis, symptomatic medicines	1	0	0	1	0	0	1	0	N/A	N/A	N/A	N/A	N/A	0	1	0	0	1	0	1
181	2	Female	24	52	155	1	A	0	No comorbidity	0	0	0	0	0	0	0	0	0	0	2	December 2022-August 2023	1	Yes	990		1	Mild	2	Andrographis, symptomatic medicines	1	0	0	1	0	0	2	1-2	Pfizer	Pfizer	N/A	N/A	N/A	3	1	0	0	1	0	0
182	2	Female	23	50	160	3	AB	0	No comorbidity	0	0	0	0	0	0	0	0	0	0	1	July- November 2022	1	Yes	2	No	1	Mild	2	symptomatic medicines	0	0	0	1	0	0	2	1-2	Sinopharm	Sinopharm	N/A	N/A	N/A	1	1	1	0	1	0	0
183	2	Female	53	46	150	2	B	1	DM	0	1	0	0	0	0	0	0	0	0	1	July- November 2022	1	Yes	2	No	1	Mild	2	symptomatic medicines	0	0	0	1	0	0	1	0	N/A	N/A	N/A	N/A	N/A	0	2	0	0	0	0	0
184	2	Female	38	63	153	4	O	1	Thalassemia	0	0	0	0	0	0	0	0	1	Thalassemia	1	July- November 2022	1	Yes	990		2	Moderate	2	symptomatic medicines	0	0	0	1	0	0	1	0	N/A	N/A	N/A	N/A	N/A	0	1	0	0	1	0	1
185	2	Female	40	57	160	1	A	0	No comorbidity	0	0	0	0	0	0	0	0	0	0	2	December 2022-August 2023	1	Yes	2	No	1	Mild	2	Flavipiravir	0	1	0	0	0	0	2	1-2	Sinopharm	Sinopharm	N/A	N/A	N/A	1	1	1	1	1	0	1
186	1	Male	49	71	162	4	O	1	Hypertension, DM	1	1	0	0	0	0	0	0	0	0	1	July- November 2022	1	Yes	990		3	Severe	3	Andrographis, Flavipiravir, symptomatic medicines, steroid	1	1	0	1	1	steroid	1	0	N/A	N/A	N/A	N/A	N/A	0	1	0	0	1	0	0
187	2	Female	18	62	150	5	N/A	0	No comorbidity	0	0	0	0	0	0	0	0	0	0	1	July- November 2022	1	Yes	2	No	1	Mild	2	symptomatic medicines	0	0	0	1	0	0	2	1-2	Sinovac	N/A	N/A	N/A	N/A	1	1	1	0	0	0	0
188	2	Female	47	50	158	1	A	0	No comorbidity	0	0	0	0	0	0	0	0	0	0	1	July- November 2022	1	Yes	2	No	1	Mild	2	symptomatic medicines	0	0	0	1	0	0	2	1-2	Sinovac	N/A	N/A	N/A	N/A	1	2	0	0	0	0	0
189	2	Female	58	46	150	3	AB	0	No comorbidity	0	0	0	0	0	0	0	0	0	0	1	July- November 2022	1	Yes	2	No	2	Moderate	2	Flavipiravir, steroid	0	1	0	0	1	steroid	2	1-2	Sinovac	Sinovac	N/A	N/A	N/A	1	2	0	0	0	0	0
190	2	Female	66	54	150	5	N/A	1	Hyperthyriod	0	0	0	0	1	0	0	0	0	0	2	December 2022-August 2023	1	Yes	2	No	1	Mild	2	symptomatic medicines	0	0	0	1	0	0	2	1-2	Sinovac	AstraZeneca	N/A	N/A	N/A	2	1	0	1	0	0	0
191	2	Female	29	67	171	4	O	0	No comorbidity	0	0	0	0	0	0	0	0	0	0	1	July- November 2022	1	Yes	2	No	1	Mild	2	symptomatic medicines	0	0	0	1	0	0	2	1-2	AstraZeneca	N/A	N/A	N/A	N/A	2	1	0	0	0	0	0
192	2	Female	60	60	155	4	O	1	Hypertension, DM	1	1	0	0	0	0	0	0	0	0	1	July- November 2022	1	Yes	990		1	Mild	2	symptomatic medicines	0	0	0	1	0	0	1	0	N/A	N/A	N/A	N/A	N/A	0	2	0	0	0	0	0
193	2	Female	44	77	153	2	B	1	Allery	0	0	0	0	0	0	0	0	1	Allery	1	July- November 2022	1	Yes	2	No	3	Severe	2	Andrographis, symptomatic medicines	1	0	0	1	0	0	1	0	N/A	N/A	N/A	N/A	N/A	0	1	0	1	0	0	1
194	2	Female	66	63	160	2	B	1	Hypertension	1	0	0	0	0	0	0	0	0	0	1	July- November 2022	1	Yes	990		1	Mild	2	Flavipiravir	0	1	0	0	0	0	1	0	N/A	N/A	N/A	N/A	N/A	0	1	0	0	1	0	0
195	2	Female	56	58	150	5	N/A	1	Hypertension, Dyslipidemia, Gall bladder	1	0	0	0	0	0	0	1	1	Gall bladder	1	July- November 2022	1	Yes	990		1	Mild	2	symptomatic medicines	0	0	0	1	0	0	1	0	N/A	N/A	N/A	N/A	N/A	0	2	0	0	0	0	0
196	2	Female	55	43	155	4	O	0	No comorbidity	0	0	0	0	0	0	0	0	0	0	2	December 2022-August 2023	1	Yes	2	No	1	Mild	2	symptomatic medicines	0	0	0	1	0	0	2	1-2	AstraZeneca	N/A	N/A	N/A	N/A	2	1	0	0	1	0	0
197	2	Female	59	62	150	1	A	1	Hypertension	1	0	0	0	0	0	0	0	0	0	1	July- November 2022	1	Yes	990		3	Severe	2	symptomatic medicines	0	0	0	1	0	0	1	0	N/A	N/A	N/A	N/A	N/A	0	1	0	0	0	0	0
198	1	Male	23	55	178	1	A	1	Allery	0	0	0	0	0	0	0	0	1	Allery	1	July- November 2022	1	Yes	2	No	2	Moderate	2	Flavipiravir	0	1	0	0	0	0	1	0	N/A	N/A	N/A	N/A	N/A	0	1	0	1	1	0	0
199	2	Female	65	66	150	2	B	1	Hypertension, Dyslipidemia, Hyperthyroid	1	0	0	0	1	0	0	1	0	0	1	July- November 2022	1	Yes	990		1	Mild	2	Flavipiravir, symptomatic medicines	0	1	0	1	0	0	1	0	N/A	N/A	N/A	N/A	N/A	0	1	0	0	1	0	0
200	2	Female	47	56	154	2	B	1	Allery	0	0	0	0	0	0	0	0	1	Allery	1	July- November 2022	1	Yes	2	No	1	Mild	2	Flavipiravir	0	1	0	0	0	0	1	0	N/A	N/A	N/A	N/A	N/A	0	1	0	1	0	0	0
201	1	Male	25	104	184	4	O	0	No comorbidity	0	0	0	0	0	0	0	0	0	0	2	December 2022-August 2023	1	Yes	2	No	1	Mild	2	symptomatic medicines	0	0	0	1	0	0	3	≥ 3	Sinovac	AstraZeneca	AstraZeneca	N/A	N/A	2	1	1	1	1	0	1
202	1	Male	30	76	175	2	B	0	No comorbidity	0	0	0	0	0	0	0	0	0	0	2	December 2022-August 2023	1	Yes	2	No	1	Mild	2	Flavipiravir	0	1	0	0	0	0	3	≥ 3	Sinovac	AstraZeneca	Pfizer	N/A	N/A	3	1	0	1	1	0	1
203	1	Male	61	63	165	5	N/A	1	Heart disease	0	0	1	0	0	0	0	0	0	0	2	December 2022-August 2023	1	Yes	2	No	1	Mild	2	symptomatic medicines	0	0	0	1	0	0	2	1-2	Sinovac	AstraZeneca	N/A	N/A	N/A	2	2	0	0	0	0	0
204	1	Male	21	70	170	2	B	0	No comorbidity	0	0	0	0	0	0	0	0	0	0	2	December 2022-August 2023	1	Yes	2	No	2	Moderate	2	Flavipiravir	0	1	0	0	0	0	3	≥ 3	Sinovac	Sinovac	N/A	N/A	N/A	1	1	0	0	1	0	0
205	2	Female	43	40	155	4	O	1	Cancer	0	0	0	0	0	0	1	0	0	0	1	July- November 2022	1	Yes	2	No	1	Mild	2	symptomatic medicines	0	0	0	1	0	0	1	0	N/A	N/A	N/A	N/A	N/A	0	2	0	0	0	0	0
206	2	Female	49	50	150	4	O	1	Dyslipidemia	0	0	0	0	0	0	0	1	0	0	1	July- November 2022	1	Yes	2	No	2	Moderate	2	Flavipiravir	0	1	0	0	0	0	1	0	N/A	N/A	N/A	N/A	N/A	0	1	0	0	1	1	1
207	2	Female	74	57	155	5	N/A	1	Hypertension, DM, Dyslipidemia	1	1	0	0	0	0	0	1	0	0	1	July- November 2022	1	Yes	990		1	Mild	2	Andrographis, symptomatic medicines	1	0	0	1	0	0	1	0	N/A	N/A	N/A	N/A	N/A	0	1	0	0	1	0	0
208	1	Male	29	67	170	1	A	0	No comorbidity	0	0	0	0	0	0	0	0	0	0	2	December 2022-August 2023	1	Yes	2	No	1	Mild	2	symptomatic medicines	0	0	0	1	0	0	3	≥ 3	Sinovac	Sinovac	AstraZeneca	Pfizer	N/A	3	1	1	0	1	0	0
209	1	Male	45	87	178	4	O	0	No comorbidity	0	0	0	0	0	0	0	0	0	0	2	December 2022-August 2023	1	Yes	2	No	1	Mild	2	symptomatic medicines	0	0	0	1	0	0	3	≥ 3	Sinovac	Sinovac	Pfizer	Pfizer	N/A	3	2	0	0	0	0	0
210	2	Female	26	50	161	2	B	0	No comorbidity	0	0	0	0	0	0	0	0	0	0	2	December 2022-August 2023	1	Yes	2	No	1	Mild	2	symptomatic medicines	0	0	0	1	0	0	2	1-2	AstraZeneca	AstraZeneca	N/A	N/A	N/A	2	1	1	0	1	0	0
211	2	Female	25	55	165	1	A	0	No comorbidity	0	0	0	0	0	0	0	0	0	0	1	July- November 2022	1	Yes	2	No	3	Severe	2	Flavipiravir	0	1	0	0	0	0	2	1-2	Pfizer	N/A	N/A	N/A	N/A	3	1	0	1	1	1	1
212	2	Female	47	50	157	4	O	0	No comorbidity	0	0	0	0	0	0	0	0	0	0	1	July- November 2022	1	Yes	2	No	1	Mild	2	Andrographis, symptomatic medicines	1	0	0	1	0	0	2	1-2	Sinovac	Sinovac	N/A	N/A	N/A	1	1	0	0	0	0	0
213	2	Female	25	56	164	2	B	0	No comorbidity	0	0	0	0	0	0	0	0	0	0	1	July- November 2022	1	Yes	2	No	1	Mild	2	symptomatic medicines	0	0	0	1	0	0	2	1-2	Sinovac	N/A	N/A	N/A	N/A	1	1	0	0	0	1	0
214	2	Female	57	52	152	2	B	0	No comorbidity	0	0	0	0	0	0	0	0	0	0	1	July- November 2022	1	Yes	2	No	1	Mild	2	Flavipiravir, symptomatic medicines	0	1	0	1	0	0	2	1-2	Sinovac	Sinovac	N/A	N/A	N/A	1	2	0	0	0	0	0
215	2	Female	26	68	157	4	O	1	Ashma	0	0	0	0	0	1	0	0	0	0	2	December 2022-August 2023	1	Yes	990		1	Mild	2	Flavipiravir	0	1	0	0	0	0	2	1-2	Sinovac	Sinovac	N/A	N/A	N/A	1	1	0	0	1	0	0
216	2	Female	29	70	163	2	B	0	No comorbidity	0	0	0	0	0	0	0	0	0	0	1	July- November 2022	1	Yes	2	No	1	Mild	2	Flavipiravir	0	1	0	0	0	0	2	1-2	Sinovac	AstraZeneca	N/A	N/A	N/A	2	2	0	0	0	0	0
217	1	Male	37	91	175	2	B	1	Hypertension	1	0	0	0	0	0	0	0	0	0	1	July- November 2022	1	Yes	990		1	Mild	2	Andrographis, symptomatic medicines	1	0	0	1	0	0	1	0	N/A	N/A	N/A	N/A	N/A	0	1	1	0	0	0	0
218	2	Female	32	58	164	2	B	1	Allery	0	0	0	0	0	0	0	0	1	Allery	1	July- November 2022	1	Yes	2	No	1	Mild	2	Flavipiravir	0	1	0	0	0	0	1	0	N/A	N/A	N/A	N/A	N/A	0	2	0	0	0	0	0
219	2	Female	31	60	160	2	B	0	No comorbidity	0	0	0	0	0	0	0	0	0	0	1	July- November 2022	1	Yes	2	No	1	Mild	2	Flavipiravir	0	1	0	0	0	0	2	1-2	AstraZeneca	N/A	N/A	N/A	N/A	2	1	0	0	1	0	0
220	2	Female	24	55	158	1	A	0	No comorbidity	0	0	0	0	0	0	0	0	0	0	1	July- November 2022	1	Yes	2	No	1	Mild	2	Andrographis, symptomatic medicines	1	0	0	1	0	0	2	1-2	Sinovac	N/A	N/A	N/A	N/A	1	2	0	0	0	0	0
221	1	Male	55	85	165	3	AB	0	No comorbidity	0	0	0	0	0	0	0	0	0	0	2	December 2022-August 2023	1	Yes	2	No	1	Mild	2	symptomatic medicines	0	0	0	1	0	0	3	≥ 3	Sinovac	AstraZeneca	AstraZeneca	N/A	N/A	2	2	0	0	0	0	0
222	1	Male	32	72	180	4	O	0	No comorbidity	0	0	0	0	0	0	0	0	0	0	2	December 2022-August 2023	1	Yes	2	No	1	Mild	2	symptomatic medicines	0	0	0	1	0	0	3	≥ 3	AstraZeneca	AstraZeneca	Pfizer	N/A	N/A	3	1	0	0	1	0	0
223	2	Female	27	53	153	4	O	0	No comorbidity	0	0	0	0	0	0	0	0	0	0	1	July- November 2022	1	Yes	2	No	1	Mild	2	Flavipiravir	0	1	0	0	0	0	2	1-2	Sinovac	AstraZeneca	N/A	N/A	N/A	2	2	0	0	0	0	0
224	2	Female	38	46	155	2	B	1	Migrane	0	0	0	0	0	0	0	0	1	Migrane	1	July- November 2022	1	Yes	2	No	2	Moderate	2	Flavipiravir	0	1	0	0	0	0	1	0	N/A	N/A	N/A	N/A	N/A	0	1	0	1	0	0	0
225	1	Male	50	60	160	5	N/A	0	No comorbidity	0	0	0	0	0	0	0	0	0	0	2	December 2022-August 2023	1	Yes	2	No	1	Mild	2	Andrographis, symptomatic medicines	1	0	0	1	0	0	3	≥ 3	Sinovac	AstraZeneca	AstraZeneca	N/A	N/A	2	1	0	1	1	0	0
226	2	Female	36	63	160	4	O	1	Hyperthyriod	0	0	0	0	1	0	0	0	0	0	2	December 2022-August 2023	1	Yes	2	No	1	Mild	2	symptomatic medicines	0	0	0	1	0	0	2	1-2	Sinovac	AstraZeneca	N/A	N/A	N/A	2	1	0	0	1	0	1
227	1	Male	61	70	176	5	N/A	1	kidney disease	0	0	0	0	0	0	0	0	1	kidney disease	1	July- November 2022	1	Yes	2	No	1	Mild	2	Flavipiravir	0	1	0	0	0	0	1	0	N/A	N/A	N/A	N/A	N/A	0	1	0	0	1	0	0
228	1	Male	38	56	165	4	O	0	No comorbidity	0	0	0	0	0	0	0	0	0	0	2	December 2022-August 2023	1	Yes	2	No	1	Mild	2	Andrographis, symptomatic medicines	1	0	0	1	0	0	3	≥ 3	Sinopharm	Sinopharm	Pfizer	N/A	N/A	3	1	0	1	1	0	1
229	2	Female	24	73	160	4	O	0	No comorbidity	0	0	0	0	0	0	0	0	0	0	1	July- November 2022	1	Yes	2	No	2	Moderate	2	Flavipiravir	0	1	0	0	0	0	2	1-2	Sinopharm	N/A	N/A	N/A	N/A	1	1	1	0	1	0	1
230	2	Female	27	48	161	2	B	0	No comorbidity	0	0	0	0	0	0	0	0	0	0	1	July- November 2022	1	Yes	2	No	2	Moderate	2	Flavipiravir	0	1	0	0	0	0	2	1-2	Sinovac	N/A	N/A	N/A	N/A	1	1	1	1	0	0	0
231	1	Male	26	88	167	2	B	0	No comorbidity	0	0	0	0	0	0	0	0	0	0	2	December 2022-August 2023	1	Yes	2	No	1	Mild	2	symptomatic medicines	0	0	0	1	0	0	3	≥ 3	Sinovac	Sinovac	Moderna	Pfizer	N/A	3	1	0	0	1	0	0
232	2	Female	36	45	162	4	O	0	No comorbidity	0	0	0	0	0	0	0	0	0	0	2	December 2022-August 2023	1	Yes	2	No	1	Mild	2	Flavipiravir	0	1	0	0	0	0	2	1-2	AstraZeneca	AstraZeneca	N/A	N/A	N/A	2	1	1	1	1	0	0
233	2	Female	58	90	150	4	O	1	Hypertension, DM, Dyslipidemia	1	1	0	0	0	0	0	1	0	0	1	July- November 2022	1	Yes	990		3	Severe	2	Flavipiravir	0	1	0	0	0	0	1	0	N/A	N/A	N/A	N/A	N/A	0	2	0	0	0	0	0
234	2	Female	39	70	160	2	B	0	No comorbidity	0	0	0	0	0	0	0	0	0	0	2	December 2022-August 2023	1	Yes	2	No	1	Mild	2	Flavipiravir, symptomatic medicines	0	1	0	1	0	0	2	1-2	Sinovac	AstraZeneca	N/A	N/A	N/A	2	1	0	0	1	1	0
235	2	Female	36	55	158	3	AB	1	Hepatitis B	0	0	0	0	0	0	0	0	1	Hepatitis B	2	December 2022-August 2023	1	Yes	2	No	1	Mild	2	Flavipiravir	0	1	0	0	0	0	2	1-2	Sinovac	AstraZeneca	N/A	N/A	N/A	2	1	1	0	1	0	1
236	1	Male	65	70	160	5	N/A	1	Hypertension, Heart disease, gout	1	0	1	0	0	0	0	0	1	Gout	1	July- November 2022	1	Yes	990		1	Mild	2	Andrographis, symptomatic medicines	1	0	0	1	0	0	1	0	N/A	N/A	N/A	N/A	N/A	0	2	0	0	0	0	0
237	2	Female	31	60	167	2	B	0	No comorbidity	0	0	0	0	0	0	0	0	0	0	2	December 2022-August 2023	1	Yes	2	No	1	Mild	2	symptomatic medicines	0	0	0	1	0	0	2	1-2	AstraZeneca	AstraZeneca	N/A	N/A	N/A	2	1	0	0	1	0	0
238	1	Male	45	90	168	1	A	0	No comorbidity	0	0	0	0	0	0	0	0	0	0	2	December 2022-August 2023	1	Yes	2	No	1	Mild	2	symptomatic medicines	0	0	0	1	0	0	3	≥ 3	Moderna	Moderna	Moderna	N/A	N/A	3	1	0	0	1	0	0
239	1	Male	26	53	165	4	O	0	No comorbidity	0	0	0	0	0	0	0	0	0	0	2	December 2022-August 2023	1	Yes	990		1	Mild	2	symptomatic medicines	0	0	0	1	0	0	3	≥ 3	Sinovac	Sinovac	Pfizer	Pfizer	N/A	3	1	0	0	0	0	0
240	1	Male	19	130	165	2	B	0	No comorbidity	0	0	0	0	0	0	0	0	0	0	2	December 2022-August 2023	1	Yes	2	No	1	Mild	2	Andrographis	1	0	0	0	0	0	3	≥ 3	Sinovac	Sinovac	Pfizer	Pfizer	N/A	3	1	0	0	1	0	0
241	1	Male	37	84	172	3	AB	0	No comorbidity	0	0	0	0	0	0	0	0	0	0	2	December 2022-August 2023	1	Yes	2	No	1	Mild	2	Andrographis	1	0	0	0	0	0	3	≥ 3	Sinovac	Sinovac	Pfizer	Pfizer	N/A	3	1	1	0	1	0	0
242	2	Female	29	52	162	4	O	0	No comorbidity	0	0	0	0	0	0	0	0	0	0	2	December 2022-August 2023	1	Yes	2	No	1	Mild	2	Flavipiravir, symptomatic medicines	0	1	0	1	0	0	2	1-2	Sinovac	AstraZeneca	N/A	N/A	N/A	2	1	1	1	1	0	0
243	1	Male	76	64	168	4	O	1	Hypertension, Stroke, Cancer	1	0	0	1	0	0	0	0	0	0	1	July- November 2022	1	Yes	990		2	Moderate	2	Flavipiravir, symptomatic medicines	0	1	0	1	0	0	1	0	N/A	N/A	N/A	N/A	N/A	0	2	0	0	0	0	0
244	1	Male	45	79	160	5	N/A	0	No comorbidity	0	0	0	0	0	0	0	0	0	0	2	December 2022-August 2023	1	Yes	2	No	1	Mild	2	symptomatic medicines	0	0	0	1	0	0	3	≥ 3	Sinovac	Sinovac	Pfizer	Pfizer	N/A	3	2	0	0	0	0	0
245	2	Female	24	58	162	4	O	0	No comorbidity	0	0	0	0	0	0	0	0	0	0	2	December 2022-August 2023	1	Yes	2	No	1	Mild	2	Flavipiravir	0	1	0	0	0	0	2	1-2	Sinopharm	Sinopharm	N/A	N/A	N/A	1	2	0	0	0	0	0
246	2	Female	26	58	163	4	O	0	No comorbidity	0	0	0	0	0	0	0	0	0	0	2	December 2022-August 2023	1	Yes	2	No	1	Mild	2	symptomatic medicines	0	0	0	1	0	0	2	1-2	Sinovac	AstraZeneca	N/A	N/A	N/A	2	1	0	0	1	0	0
247	2	Female	29	39	164	2	B	1	spastic paraparesis	0	0	0	0	0	0	0	0	1	spastic paraparesis	2	December 2022-August 2023	1	Yes	2	No	2	Moderate	2	Flavipiravir	0	1	0	0	0	0	1	0	N/A	N/A	N/A	N/A	N/A	0	1	1	0	1	0	1
248	2	Female	29	48	160	2	B	0	No comorbidity	0	0	0	0	0	0	0	0	0	0	2	December 2022-August 2023	1	Yes	2	No	1	Mild	2	Flavipiravir	0	1	0	0	0	0	2	1-2	Sinovac	AstraZeneca	N/A	N/A	N/A	2	1	0	0	0	0	0
249	2	Female	26	46	158	4	O	0	No comorbidity	0	0	0	0	0	0	0	0	0	0	2	December 2022-August 2023	1	Yes	2	No	1	Mild	2	symptomatic medicines	0	0	0	1	0	0	2	1-2	Sinovac	AstraZeneca	N/A	N/A	N/A	2	1	1	1	1	0	0
250	2	Female	25	58	158	2	B	0	No comorbidity	0	0	0	0	0	0	0	0	0	0	2	December 2022-August 2023	1	Yes	2	No	1	Mild	2	Flavipiravir	0	1	0	0	0	0	2	1-2	Moderna	Moderna	N/A	N/A	N/A	3	1	1	1	1	0	0
251	2	Female	31	53.5	150	4	O	0	No comorbidity	0	0	0	0	0	0	0	0	0	0	2	December 2022-August 2023	1	Yes	2	No	2	Moderate	2	symptomatic medicines	0	0	0	1	0	0	2	1-2	Sinopharm	Sinopharm	N/A	N/A	N/A	1	1	1	1	1	0	0
[truncated: 3 more columns]

## Sheet: Incuded 247 participants
Participation ID	Code_Gender	Gender	Age (Y)	Code_Age range	Weight (Kg)	Height (cm)	Height (m)	BMI	Code_BMI	Code_Blood group	Blood group	Code_Comorbidity	Comorbidity disease (can select more than 1 option)	A6.1_Hypertension	A6.2_DM	A6.3_Heart Dz.	A6.4_Stroke	A6.5_Hyperthyroid	A6.6_ Ashma	A6.7_Cancer	A6.8_Dyslipidemia	A6.9_others	A6.9_Specify	No. of comorbidity	Code_No. of comorbidity-1	Code_No. of comorbidity-2	Code_Time of COVID-19 disease	Time of COVID-19 disease	Code_ First COVID-19 infection	First COVID-19 infection	Code_ Infection during pregnant	Infection during pregnant	Code_Disease severity	Disease severity	Code_treatment by drugs	Treatment by drugs	C1.1_Andrographis	C1.2_ Favipiravir	C1.3_ Molnupiravir	C1.4_ Symptomatic drugs	C1.5_Others	C1.5_Specify	Code_No. of vaccination	No. of vaccination	1st dose vccinationa	2nd dose vccinationa	3rd dose vccinationa	4th dose vccinationa	5th dose vccinationa
	Male=1 Female=2			18-29=1 30-39=2 40-49=3 50-59=4 more than 60=5					Underweight (< 18.5)=1 Normal (18.5-22.9)=2 Overweight (23-24.9)=3 Obese (≥ 25)=4	A=1 B=2 AB=3 O=4 N/A=5		Yes=1 No=0		Yes=1 No=0	Yes=1 No=0	Yes=1 No=0	Yes=1 No=0	Yes=1 No=0	Yes=1 No=0	Yes=1 No=0	Yes=1 No=0	Yes=1 No=0	Specify other diseases		0= 0 1= 1 2= >/=2	0= 0 1= 1-2 2= >/= 3	July- November 2022=1 December 2022-August 2023=2		Yes=1 No=0		Yes=1 No=2 990=Male		Mild=1 Moderate=2 Severe=3		Yes=1 No=0		Yes=1 No=0	Yes=1 No=0	Yes=1 No=0	Yes=1 No=0	Yes=1 No=0	Specify other drugs	1= 0 2= 1-2 3= >/=3
1	2	Female	30	2	56	165	1.65	20.5693	2	4	O	0	No comorbidity	0	0	0	0	0	0	0	0	0	0	0	0	0	2	December 2022-August 2023	1	Yes	2	No	1	Mild	1	Flavipiravir	0	1	0	0	0	0	3	≥ 3	Pfizer	Pfizer	Pfizer	N/A	N/A
2	1	Male	36	2	80	180	1.8	24.6914	3	4	O	1	Hypertension	1	0	0	0	0	0	0	0	0	0	1	1	1	1	July- November 2022	1	Yes	990		1	Mild	1	Flavipiravir	0	1	0	0	0	0	1	0	N/A	N/A	N/A	N/A	N/A
3	1	Male	28	1	65	170	1.7	22.4913	2	1	A	0	No comorbidity	0	0	0	0	0	0	0	0	0	0	0	0	0	1	July- November 2022	1	Yes	2	No	1	Mild	1	Symptomatic drugs	0	0	0	1	0	0	1	0	N/A	N/A	N/A	N/A	N/A
4	2	Female	34	2	78	164	1.64	29.0006	4	3	AB	1	Hyperthyriod	0	0	0	0	1	0	0	0	0	0	1	1	1	1	July- November 2022	1	Yes	990		1	Mild	1	Symptomatic drugs	0	0	0	1	0	0	1	0	N/A	N/A	N/A	N/A	N/A
5	1	Male	32	2	87	169	1.69	30.4611	4	4	O	1	Hypertension	1	0	0	0	0	0	0	0	0	0	1	1	1	1	July- November 2022	1	Yes	2	No	3	Severe	1	Flavipiravir	0	1	0	0	0	0	1	0	N/A	N/A	N/A	N/A	N/A
6	2	Female	33	2	65	160	1.6	25.3906	4	3	AB	1	DM	0	1	0	0	0	0	0	0	0	0	1	1	1	1	July- November 2022	1	Yes	2	No	1	Mild	1	Symptomatic drugs	0	0	0	1	0	0	1	0	N/A	N/A	N/A	N/A	N/A
7	1	Male	29	1	70	174	1.74	23.1206	3	2	B	0	No comorbidity	0	0	0	0	0	0	0	0	0	0	0	0	0	1	July- November 2022	1	Yes	2	No	1	Mild	1	Symptomatic drugs	0	0	0	1	0	0	1	0	N/A	N/A	N/A	N/A	N/A
8	1	Male	31	2	64	165	1.65	23.5078	3	2	B	0	No comorbidity	0	0	0	0	0	0	0	0	0	0	0	0	0	1	July- November 2022	1	Yes	2	No	3	Severe	1	Flavipiravir, steroid	0	1	0	0	1	steroid	1	0	N/A	N/A	N/A	N/A	N/A
9	1	Male	38	2	74	175	1.75	24.1633	3	4	O	0	No comorbidity	0	0	0	0	0	0	0	0	0	0	0	0	0	1	July- November 2022	1	Yes	2	No	2	Moderate	1	Flavipiravir, steroid	0	1	0	0	1	steroid	1	0	N/A	N/A	N/A	N/A	N/A
10	2	Female	37	2	55	162	1.62	20.9572	2	1	A	0	No comorbidity	0	0	0	0	0	0	0	0	0	0	0	0	0	2	December 2022-August 2023	1	Yes	2	No	1	Mild	1	Andrographis, Symptomatic drugs	1	0	0	1	0	0	3	≥ 3	Sinovac	Sinovac	Pfizer	N/A	N/A
11	2	Female	23	1	58	170	1.7	20.0692	2	1	A	0	No comorbidity	0	0	0	0	0	0	0	0	0	0	0	0	0	2	December 2022-August 2023	1	Yes	2	No	1	Mild	1	Molnupiravir	0	0	1	0	0	0	3	≥ 3	Sinovac	Sinovac	Pfizer	Pfizer	N/A
12	1	Male	21	1	68	190	1.9	18.8366	2	4	O	1	Acute Rhinitis, Amblyopia with Vitreous Degeneration, Bilateral high frequency sensorineural hearing loss	0	0	0	0	0	0	0	0	1	Acute Rhinitis, Amblyopia with Vitreous Degeneration, Bilateral high frequency sensorineural hearing loss	1	1	1	1	July- November 2022	1	Yes	990		1	Mild	1	Andrographis, Symptomatic drugs	1	0	0	1	0	0	1	0	N/A	N/A	N/A	N/A	N/A
13	1	Male	30	2	76	170	1.7	26.2976	4	4	O	0	No comorbidity	0	0	0	0	0	0	0	0	0	0	0	0	0	1	July- November 2022	1	Yes	2	No	1	Mild	1	Flavipiravir	0	1	0	0	0	0	1	0	N/A	N/A	N/A	N/A	N/A
14	1	Male	35	2	73	168	1.68	25.8645	4	4	O	0	No comorbidity	0	0	0	0	0	0	0	0	0	0	0	0	0	1	July- November 2022	1	Yes	2	No	3	Severe	1	Symptomatic drugs	0	0	0	1	0	0	1	0	N/A	N/A	N/A	N/A	N/A
15	2	Female	37	2	67	155	1.55	27.8876	4	1	A	0	No comorbidity	0	0	0	0	0	0	0	0	0	0	0	0	0	2	December 2022-August 2023	1	Yes	2	No	1	Mild	1	Molnupiravir	0	0	1	0	0	0	3	≥ 3	Sinovac	Sinovac	Pfizer	Pfizer	N/A
16	1	Male	33	2	72	164	1.64	26.7698	4	4	O	0	No comorbidity	0	0	0	0	0	0	0	0	0	0	0	0	0	1	July- November 2022	1	Yes	2	No	1	Mild	1	Flavipiravir	0	1	0	0	0	0	1	0	N/A	N/A	N/A	N/A	N/A
17	2	Female	50	4	61	156	1.56	25.0657	4	1	A	1	Pulmonary edema	0	0	0	0	0	0	0	0	1	Pulmonary edema	1	1	1	2	December 2022-August 2023	1	Yes	2	No	1	Mild	1	Flavipiravir	0	1	0	0	0	0	3	≥ 3	Sinovac	Sinovac	Pfizer	Pfizer	N/A
18	1	Male	43	3	60	167	1.67	21.5139	2	1	A	0	No comorbidity	0	0	0	0	0	0	0	0	0	0	0	0	0	2	December 2022-August 2023	1	Yes	990		1	Mild	1	Symptomatic drugs	0	0	0	1	0	0	1	0	N/A	N/A	N/A	N/A	N/A
19	1	Male	24	1	58	170	1.7	20.0692	2	4	O	0	No comorbidity	0	0	0	0	0	0	0	0	0	0	0	0	0	2	December 2022-August 2023	1	Yes	990		1	Mild	1	Symptomatic drugs	0	0	0	1	0	0	1	0	N/A	N/A	N/A	N/A	N/A
20	2	Female	27	1	65	168	1.68	23.03	3	4	O	0	No comorbidity	0	0	0	0	0	0	0	0	0	0	0	0	0	2	December 2022-August 2023	1	Yes	2	No	1	Mild	1	Flavipiravir	0	1	0	0	0	0	3	≥ 3	Sinovac	Sinovac	Pfizer	Pfizer	N/A
21	2	Female	27	1	70	165	1.65	25.7117	4	1	A	0	No comorbidity	0	0	0	0	0	0	0	0	0	0	0	0	0	2	December 2022-August 2023	1	Yes	2	No	1	Mild	1	Flavipiravir	0	1	0	0	0	0	3	≥ 3	Sinovac	Sinovac	Pfizer	Pfizer	N/A
22	1	Male	19	1	55	162	1.62	20.9572	2	5	N/A	0	No comorbidity	0	0	0	0	0	0	0	0	0	0	0	0	0	1	July- November 2022	1	Yes	2	No	1	Mild	1	Flavipiravir	0	1	0	0	0	0	1	0	N/A	N/A	N/A	N/A	N/A
23	2	Female	35	2	56	170	1.7	19.3772	2	1	A	0	No comorbidity	0	0	0	0	0	0	0	0	0	0	0	0	0	2	December 2022-August 2023	1	Yes	2	No	1	Mild	1	Flavipiravir	0	1	0	0	0	0	3	≥ 3	Sinovac	Sinovac	Pfizer	Moderna	N/A
24	1	Male	44	3	77	165	1.65	28.2828	4	5	N/A	0	No comorbidity	0	0	0	0	0	0	0	0	0	0	0	0	0	2	December 2022-August 2023	1	Yes	2	No	2	Moderate	1	Symptomatic drugs	0	0	0	1	0	0	1	0	N/A	N/A	N/A	N/A	N/A
25	2	Female	51	4	60	150	1.5	26.6667	4	5	N/A	0	No comorbidity	0	0	0	0	0	0	0	0	0	0	0	0	0	2	December 2022-August 2023	1	Yes	2	No	1	Mild	1	Flavipiravir, Symptomatic drugs	0	1	0	1	0	0	3	≥ 3	Sinovac	Sinovac	Pfizer	Pfizer	N/A
26	1	Male	46	3	72	170	1.7	24.9135	3	4	O	1	Hypertension, Gout	1	0	0	0	0	0	0	0	1	Gout	2	2	2	1	July- November 2022	1	Yes	990		1	Mild	1	Andrographis	1	0	0	0	0	0	1	0	N/A	N/A	N/A	N/A	N/A
27	2	Female	48	3	61	157	1.57	24.7475	3	4	O	0	No comorbidity	0	0	0	0	0	0	0	0	0	0	0	0	0	2	December 2022-August 2023	1	Yes	2	No	1	Mild	1	Andrographis, Symptomatic drugs	1	0	0	1	0	0	3	≥ 3	Sinopharm	Sinopharm	Moderna	Moderna	N/A
28	1	Male	25	1	70	170	1.7	24.2215	3	4	O	0	No comorbidity	0	0	0	0	0	0	0	0	0	0	0	0	0	1	July- November 2022	1	Yes	990		3	Severe	1	steroid	0	0	0	0	1	steroid	1	0	N/A	N/A	N/A	N/A	N/A
29	1	Male	59	4	84	150	1.5	37.3333	4	1	A	1	Hypertension	1	0	0	0	0	0	0	0	0	0	1	1	1	1	July- November 2022	1	Yes	2	No	1	Mild	1	Flavipiravir	0	1	0	0	0	0	1	0	N/A	N/A	N/A	N/A	N/A
30	1	Male	29	1	63	163	1.63	23.7118	3	3	AB	0	No comorbidity	0	0	0	0	0	0	0	0	0	0	0	0	0	1	July- November 2022	1	Yes	990		1	Mild	1	Andrographis	1	0	0	0	0	0	1	0	N/A	N/A	N/A	N/A	N/A
31	2	Female	60	5	50	148	1.48	22.8269	2	2	B	1	Hypertension	1	0	0	0	0	0	0	0	0	0	1	1	1	2	December 2022-August 2023	1	Yes	990		1	Mild	1	Flavipiravir	0	1	0	0	0	0	1	0	N/A	N/A	N/A	N/A	N/A
32	1	Male	36	2	80	175	1.75	26.1224	4	2	B	1	Hypertension	1	0	0	0	0	0	0	0	0	0	1	1	1	1	July- November 2022	1	Yes	990		2	Moderate	1	Flavipiravir, steroid	0	1	0	0	1	steroid	1	0	N/A	N/A	N/A	N/A	N/A
33	2	Female	50	4	53	150	1.5	23.5556	3	4	O	0	No comorbidity	0	0	0	0	0	0	0	0	0	0	0	0	0	2	December 2022-August 2023	1	Yes	2	No	1	Mild	1	Molnupiravir	0	0	1	0	0	0	3	≥ 3	Sinovac	Sinovac	Pfizer	Pfizer	N/A
34	2	Female	20	1	65	165	1.65	23.8751	3	5	N/A	0	No comorbidity	0	0	0	0	0	0	0	0	0	0	0	0	0	2	December 2022-August 2023	1	Yes	2	No	1	Mild	1	Andrographis	1	0	0	0	0	0	3	≥ 3	AstraZeneca	AstraZeneca	Moderna	N/A	N/A
35	2	Female	51	4	72	158	1.58	28.8415	4	5	N/A	0	No comorbidity	0	0	0	0	0	0	0	0	0	0	0	0	0	2	December 2022-August 2023	1	Yes	2	No	1	Mild	1	Symptomatic drugs	0	0	0	1	0	0	3	≥ 3	Sinovac	Sinovac	Pfizer	Pfizer	N/A
36	2	Female	44	3	70	168	1.68	24.8016	3	2	B	0	No comorbidity	0	0	0	0	0	0	0	0	0	0	0	0	0	2	December 2022-August 2023	1	Yes	2	No	1	Mild	1	Flavipiravir	0	1	0	0	0	0	3	≥ 3	Sinovac	Sinovac	Pfizer	Pfizer	N/A
37	1	Male	40	3	80	160	1.6	31.25	4	1	A	1	Hypertension	1	0	0	0	0	0	0	0	0	0	1	1	1	1	July- November 2022	1	Yes	990		1	Mild	1	Symptomatic drugs	0	0	0	1	0	0	1	0	N/A	N/A	N/A	N/A	N/A
38	2	Female	20	1	53	161	1.61	20.4467	2	2	B	0	No comorbidity	0	0	0	0	0	0	0	0	0	0	0	0	0	2	December 2022-August 2023	1	Yes	2	No	1	Mild	1	Molnupiravir, Symptomatic drugs	0	0	1	1	0	0	3	≥ 3	Sinopharm	Sinopharm	Moderna	N/A	N/A
39	2	Female	29	1	62	153	1.53	26.4855	4	2	B	0	No comorbidity	0	0	0	0	0	0	0	0	0	0	0	0	0	1	July- November 2022	1	Yes	2	No	2	Moderate	1	Andrographis, Symptomatic drugs	1	0	0	1	0	0	3	≥ 3	Sinovac	Sinovac	AstraZeneca	N/A	N/A
40	1	Male	51	4	78	164	1.64	29.0006	4	5	N/A	0	No comorbidity	0	0	0	0	0	0	0	0	0	0	0	0	0	2	December 2022-August 2023	1	Yes	2	No	1	Mild	1	Flavipiravir	0	1	0	0	0	0	3	≥ 3	Sinovac	Sinovac	Pfizer	Pfizer	N/A
41	1	Male	38	2	75	165	1.65	27.5482	4	4	O	1	DM	0	1	0	0	0	0	0	0	0	0	1	1	1	1	July- November 2022	1	Yes	2	No	1	Mild	1	Flavipiravir	0	1	0	0	0	0	1	0	N/A	N/A	N/A	N/A	N/A
42	2	Female	46	3	65	167	1.67	23.3067	3	5	N/A	0	No comorbidity	0	0	0	0	0	0	0	0	0	0	0	0	0	2	December 2022-August 2023	1	Yes	2	No	1	Mild	1	Flavipiravir	0	1	0	0	0	0	3	≥ 3	Sinovac	Sinovac	Pfizer	Pfizer	N/A
43	1	Male	64	5	63	171	1.71	21.5451	2	3	AB	0	No comorbidity	0	0	0	0	0	0	0	0	0	0	0	0	0	2	December 2022-August 2023	1	Yes	2	No	1	Mild	1	Flavipiravir	0	1	0	0	0	0	3	≥ 3	Sinovac	Sinovac	AstraZeneca	Pfizer	N/A
44	1	Male	38	2	53	175	1.75	17.3061	1	3	AB	0	No comorbidity	0	0	0	0	0	0	0	0	0	0	0	0	0	2	December 2022-August 2023	1	Yes	2	No	1	Mild	1	Flavipiravir	0	1	0	0	0	0	3	≥ 3	Sinovac	Sinovac	AstraZeneca	Moderna	N/A
45	2	Female	33	2	45	165	1.65	16.5289	1	5	N/A	0	No comorbidity	0	0	0	0	0	0	0	0	0	0	0	0	0	2	December 2022-August 2023	1	Yes	2	No	2	Moderate	1	Flavipiravir	0	1	0	0	0	0	3	≥ 3	Sinovac	Sinovac	Pfizer	Pfizer	N/A
46	2	Female	19	1	39	155	1.55	16.2331	1	4	O	0	No comorbidity	0	0	0	0	0	0	0	0	0	0	0	0	0	2	December 2022-August 2023	1	Yes	990		1	Mild	1	Andrographis	1	0	0	0	0	0	2	1-2	AstraZeneca	AstraZeneca	N/A	N/A	N/A
47	1	Male	22	1	55	170	1.7	19.0311	2	5	N/A	0	No comorbidity	0	0	0	0	0	0	0	0	0	0	0	0	0	1	July- November 2022	1	Yes	2	No	1	Mild	1	Molnupiravir	0	0	1	0	0	0	3	≥ 3	Sinovac	Sinovac	Pfizer	Pfizer	N/A
48	1	Male	66	5	60	159	1.59	23.7332	3	2	B	1	Hypertension, heart disease, Dyslipidemia, Colon cancer	1	0	1	0	0	0	1	1	0	0	4	2	2	1	July- November 2022	1	Yes	990		3	Severe	1	Symptomatic drugs	0	0	0	1	0	0	1	0	N/A	N/A	N/A	N/A	N/A
49	2	Female	36	2	65	158	1.58	26.0375	4	1	A	0	No comorbidity	0	0	0	0	0	0	0	0	0	0	0	0	0	2	December 2022-August 2023	1	Yes	990		1	Mild	1	Flavipiravir	0	1	0	0	0	0	2	1-2	AstraZeneca	AstraZeneca	N/A	N/A	N/A
50	1	Male	51	4	68	164	1.64	25.2826	4	1	A	0	No comorbidity	0	0	0	0	0	0	0	0	0	0	0	0	0	2	December 2022-August 2023	1	Yes	2	No	1	Mild	1	Flavipiravir	0	1	0	0	0	0	3	≥ 3	Sinovac	Sinovac	Pfizer	N/A	N/A
51	2	Female	50	4	62	157	1.57	25.1532	4	4	O	0	No comorbidity	0	0	0	0	0	0	0	0	0	0	0	0	0	2	December 2022-August 2023	1	Yes	2	No	1	Mild	1	Symptomatic drugs	0	0	0	1	0	0	2	1-2	Sinovac	Sinopharm	N/A	N/A	N/A
52	1	Male	73	5	80	162	1.62	30.4832	4	5	N/A	1	Benign Prostatic Hyperplasia, Dyslipidemia, Emphysema	0	0	0	0	0	0	0	1	1	Benign Prostatic Hyperplasia, Dyslipidemia, Emphysema	2	2	2	1	July- November 2022	1	Yes	2	No	2	Moderate	1	Flavipiravir	0	1	0	0	0	0	1	0	N/A	N/A	N/A	N/A	N/A
53	2	Female	36	2	70	168	1.68	24.8016	3	5	N/A	0	No comorbidity	0	0	0	0	0	0	0	0	0	0	0	0	0	1	July- November 2022	1	Yes	990		1	Mild	1	Andrographis, Symptomatic drugs	1	0	0	1	0	0	2	1-2	Sinovac	Sinovac	N/A	N/A	N/A
54	1	Male	24	1	72	172	1.72	24.3375	3	5	N/A	0	No comorbidity	0	0	0	0	0	0	0	0	0	0	0	0	0	2	December 2022-August 2023	1	Yes	2	No	1	Mild	1	Andrographis, Symptomatic drugs	1	0	0	1	0	0	3	≥ 3	Sinovac	Sinovac	Pfizer	N/A	N/A
55	2	Female	31	2	60	160	1.6	23.4375	3	5	N/A	0	No comorbidity	0	0	0	0	0	0	0	0	0	0	0	0	0	1	July- November 2022	1	Yes	990		2	Moderate	1	Flavipiravir	0	1	0	0	0	0	2	1-2	Sinovac	N/A	N/A	N/A	N/A
56	2	Female	35	2	52	158	1.58	20.83	2	4	O	0	No comorbidity	0	0	0	0	0	0	0	0	0	0	0	0	0	1	July- November 2022	1	Yes	990		1	Mild	1	Andrographis, Symptomatic drugs	1	0	0	1	0	0	2	1-2	Sinovac	N/A	N/A	N/A	N/A
57	2	Female	33	2	59	158	1.58	23.634	3	2	B	0	No comorbidity	0	0	0	0	0	0	0	0	0	0	0	0	0	1	July- November 2022	1	Yes	2	No	1	Mild	1	Flavipiravir	0	1	0	0	0	0	2	1-2	Sinovac	N/A	N/A	N/A	N/A
58	1	Male	38	2	84	179	1.79	26.2164	4	5	N/A	0	No comorbidity	0	0	0	0	0	0	0	0	0	0	0	0	0	2	December 2022-August 2023	1	Yes	2	No	1	Mild	1	Symptomatic drugs	0	0	0	1	0	0	3	≥ 3	Sinopharm	Sinopharm	Moderna	N/A	N/A
59	2	Female	18	1	65	162	1.62	24.7676	3	2	B	1	Allery, thrombocytopenia	0	0	0	0	0	1	0	0	0	Allery, thrombocytopenia	1	1	1	2	December 2022-August 2023	1	Yes	2	No	1	Mild	1	Flavipiravir	0	1	0	0	0	0	2	1-2	AstraZeneca	AstraZeneca	N/A	N/A	N/A
60	1	Male	45	3	48	160	1.6	18.75	2	2	B	1	SLE	0	0	0	0	0	0	0	0	1	SLE	1	1	1	2	December 2022-August 2023	1	Yes	2	No	1	Mild	1	Symptomatic drugs	0	0	0	1	0	0	2	1-2	Moderna	Moderna	N/A	N/A	N/A
61	2	Female	33	2	70	155	1.55	29.1363	4	5	N/A	0	No comorbidity	0	0	0	0	0	0	0	0	0	0	0	0	0	1	July- November 2022	1	Yes	2	No	2	Moderate	1	Flavipiravir	0	1	0	0	0	0	2	1-2	Sinovac	N/A	N/A	N/A	N/A
62	2	Female	37	2	50	156	1.56	20.5457	2	2	B	0	No comorbidity	0	0	0	0	0	0	0	0	0	0	0	0	0	2	December 2022-August 2023	1	Yes	2	No	1	Mild	1	Flavipiravir	0	1	0	0	0	0	2	1-2	Pfizer	N/A	N/A	N/A	N/A
63	1	Male	47	3	57	160	1.6	22.2656	2	3	AB	0	No comorbidity	0	0	0	0	0	0	0	0	0	0	0	0	0	2	December 2022-August 2023	1	Yes	2	No	2	Moderate	1	Flavipiravir	0	1	0	0	0	0	3	≥ 3	Sinovac	Sinovac	Pfizer	N/A	N/A
64	1	Male	21	1	65	173	1.73	21.7181	2	1	A	1	Ashma	0	0	0	0	0	1	0	0	0	0	1	1	1	2	December 2022-August 2023	1	Yes	2	No	2	Moderate	1	Symptomatic drugs	0	0	0	1	0	0	2	1-2	Sinopharm	Sinopharm	N/A	N/A	N/A
65	2	Female	31	2	56	144	1.44	27.0062	4	2	B	0	No comorbidity	0	0	0	0	0	0	0	0	0	0	0	0	0	2	December 2022-August 2023	1	Yes	2	No	1	Mild	1	Symptomatic drugs	0	0	0	1	0	0	2	1-2	Moderna	N/A	N/A	N/A	N/A
66	2	Female	27	1	64	160	1.6	25	4	2	B	0	No comorbidity	0	0	0	0	0	0	0	0	0	0	0	0	0	2	December 2022-August 2023	1	Yes	2	No	1	Mild	1	Flavipiravir	0	1	0	0	0	0	2	1-2	Sinopharm	Sinopharm	N/A	N/A	N/A
67	2	Female	31	2	70	165	1.65	25.7117	4	1	A	1	DM	0	1	0	0	0	0	0	0	0	0	1	1	1	1	July- November 2022	1	Yes	2	No	2	Moderate	1	Flavipiravir	0	1	0	0	0	0	1	0	N/A	N/A	N/A	N/A	N/A
68	1	Male	44	3	67	167	1.67	24.0238	3	5	N/A	0	No comorbidity	0	0	0	0	0	0	0	0	0	0	0	0	0	1	July- November 2022	1	Yes	990		2	Moderate	1	Flavipiravir	0	1	0	0	0	0	3	≥ 3	Pfizer	Pfizer	Pfizer	N/A	N/A
69	1	Male	22	1	67	166	1.66	24.3141	3	3	AB	0	No comorbidity	0	0	0	0	0	0	0	0	0	0	0	0	0	2	December 2022-August 2023	1	Yes	990		1	Mild	1	Flavipiravir	0	1	0	0	0	0	3	≥ 3	Sinovac	Sinovac	Pfizer	Pfizer	N/A
70	2	Female	43	3	69	160	1.6	26.9531	4	1	A	0	No comorbidity	0	0	0	0	0	0	0	0	0	0	0	0	0	1	July- November 2022	1	Yes	990		2	Moderate	1	Flavipiravir	0	1	0	0	0	0	2	1-2	Sinovac	N/A	N/A	N/A	N/A
71	2	Female	42	3	78	150	1.5	34.6667	4	2	B	0	No comorbidity	0	0	0	0	0	0	0	0	0	0	0	0	0	2	December 2022-August 2023	1	Yes	990		1	Mild	1	Symptomatic drugs	0	0	0	1	0	0	2	1-2	Sinovac	AstraZeneca	N/A	N/A	N/A
72	1	Male	24	1	50	175	1.75	16.3265	1	4	O	0	No comorbidity	0	0	0	0	0	0	0	0	0	0	0	0	0	2	December 2022-August 2023	1	Yes	2	No	1	Mild	1	Flavipiravir	0	1	0	0	0	0	3	≥ 3	Sinovac	Sinovac	AstraZeneca	N/A	N/A
73	2	Female	30	2	50	165	1.65	18.3655	1	4	O	0	No comorbidity	0	0	0	0	0	0	0	0	0	0	0	0	0	2	December 2022-August 2023	1	Yes	2	No	1	Mild	1	Symptomatic drugs	0	0	0	1	0	0	2	1-2	Sinovac	AstraZeneca	N/A	N/A	N/A
74	1	Male	25	1	95	175	1.75	31.0204	4	5	N/A	0	No comorbidity	0	0	0	0	0	0	0	0	0	0	0	0	0	2	December 2022-August 2023	1	Yes	2	No	1	Mild	1	Symptomatic drugs	0	0	0	1	0	0	3	≥ 3	AstraZeneca	AstraZeneca	Pfizer	N/A	N/A
75	2	Female	39	2	70	158	1.58	28.0404	4	1	A	0	No comorbidity	0	0	0	0	0	0	0	0	0	0	0	0	0	2	December 2022-August 2023	1	Yes	2	No	1	Mild	1	Andrographis, Symptomatic drugs	1	0	0	1	0	0	2	1-2	Sinovac	AstraZeneca	N/A	N/A	N/A
76	2	Female	36	2	60	159	1.59	23.7332	3	4	O	0	No comorbidity	0	0	0	0	0	0	0	0	0	0	0	0	0	2	December 2022-August 2023	1	Yes	990		1	Mild	1	Symptomatic drugs	0	0	0	1	0	0	2	1-2	AstraZeneca	AstraZeneca	N/A	N/A	N/A
77	1	Male	20	1	60	172	1.72	20.2812	2	5	N/A	0	No comorbidity	0	0	0	0	0	0	0	0	0	0	0	0	0	2	December 2022-August 2023	1	Yes	2	No	1	Mild	1	Flavipiravir	0	1	0	0	0	0	3	≥ 3	Sinovac	Sinovac	AstraZeneca	N/A	N/A
78	2	Female	28	1	45	160	1.6	17.5781	1	4	O	0	No comorbidity	0	0	0	0	0	0	0	0	0	0	0	0	0	2	December 2022-August 2023	1	Yes	2	No	1	Mild	1	Andrographis, Symptomatic drugs	1	0	0	1	0	0	2	1-2	Sinopharm	Sinovac	N/A	N/A	N/A
79	2	Female	31	2	61	157	1.57	24.7475	3	4	O	1	Hyperthyriod	0	0	0	0	1	0	0	0	0	0	1	1	1	2	December 2022-August 2023	1	Yes	2	No	1	Mild	1	Flavipiravir	0	1	0	0	0	0	2	1-2	Pfizer	Pfizer	N/A	N/A	N/A
80	2	Female	39	2	55	160	1.6	21.4844	2	2	B	0	No comorbidity	0	0	0	0	0	0	0	0	0	0	0	0	0	2	December 2022-August 2023	1	Yes	990		1	Mild	1	Flavipiravir, Symptomatic drugs	0	1	0	1	0	0	2	1-2	Sinovac	Sinopharm	N/A	N/A	N/A
81	2	Female	31	2	54	151	1.51	23.6832	3	4	O	1	Allery	0	0	0	0	0	1	0	0	0	Allery	1	1	1	1	July- November 2022	1	Yes	2	No	1	Mild	1	Flavipiravir	0	1	0	0	0	0	3	≥ 3	AstraZeneca	AstraZeneca	AstraZeneca	AstraZeneca	N/A
82	2	Female	46	3	70	165	1.65	25.7117	4	5	N/A	1	Hypertension	1	0	0	0	0	0	0	0	0	0	1	1	1	1	July- November 2022	1	Yes	990		2	Moderate	1	Flavipiravir	0	1	0	0	0	0	1	0	N/A	N/A	N/A	N/A	N/A
83	1	Male	24	1	62	170	1.7	21.4533	2	4	O	0	No comorbidity	0	0	0	0	0	0	0	0	0	0	0	0	0	2	December 2022-August 2023	1	Yes	2	No	1	Mild	1	Flavipiravir	0	1	0	0	0	0	3	≥ 3	Sinovac	AstraZeneca	Pfizer	N/A	N/A
84	1	Male	40	3	75	173	1.73	25.0593	4	5	N/A	1	Sinusitis	0	0	0	0	0	1	0	0	0	Sinusitis	1	1	1	1	July- November 2022	1	Yes	990		1	Mild	1	Flavipiravir	0	1	0	0	0	0	1	0	N/A	N/A	N/A	N/A	N/A
85	2	Female	47	3	60	156	1.56	24.6548	3	2	B	0	No comorbidity	0	0	0	0	0	0	0	0	0	0	0	0	0	1	July- November 2022	1	Yes	990		1	Mild	1	Flavipiravir	0	1	0	0	0	0	2	1-2	Sinopharm	N/A	N/A	N/A	N/A
86	2	Female	47	3	59	155	1.55	24.5578	3	3	AB	0	No comorbidity	0	0	0	0	0	0	0	0	0	0	0	0	0	1	July- November 2022	1	Yes	990		2	Moderate	1	Flavipiravir	0	1	0	0	0	0	2	1-2	Sinopharm	N/A	N/A	N/A	N/A
87	1	Male	34	2	70	163	1.63	26.3465	4	4	O	0	No comorbidity	0	0	0	0	0	0	0	0	0	0	0	0	0	2	December 2022-August 2023	1	Yes	2	No	1	Mild	1	Flavipiravir	0	1	0	0	0	0	3	≥ 3	Sinopharm	Sinopharm	Pfizer	N/A	N/A
88	2	Female	32	2	84	163	1.63	31.6158	4	2	B	0	No comorbidity	0	0	0	0	0	0	0	0	0	0	0	0	0	2	December 2022-August 2023	1	Yes	2	No	1	Mild	1	Symptomatic drugs	0	0	0	1	0	0	2	1-2	Sinovac	AstraZeneca	N/A	N/A	N/A
89	1	Male	60	5	63	167	1.67	22.5896	2	4	O	0	No comorbidity	0	0	0	0	0	0	0	0	0	0	0	0	0	2	December 2022-August 2023	1	Yes	990		1	Mild	1	Flavipiravir	0	1	0	0	0	0	3	≥ 3	AstraZeneca	AstraZeneca	Pfizer	N/A	N/A
90	2	Female	48	3	55	167	1.67	19.721	2	3	AB	0	No comorbidity	0	0	0	0	0	0	0	0	0	0	0	0	0	2	December 2022-August 2023	1	Yes	990		1	Mild	1	Flavipiravir	0	1	0	0	0	0	2	1-2	Sinovac	AstraZeneca	N/A	N/A	N/A
91	1	Male	50	4	85	160	1.6	33.2031	4	2	B	0	No comorbidity	0	0	0	0	0	0	0	0	0	0	0	0	0	2	December 2022-August 2023	1	Yes	990		1	Mild	1	Symptomatic drugs	0	0	0	1	0	0	3	≥ 3	Sinovac	AstraZeneca	Moderna	N/A	N/A
92	1	Male	36	2	65	160	1.6	25.3906	4	4	O	0	No comorbidity	0	0	0	0	0	0	0	0	0	0	0	0	0	2	December 2022-August 2023	1	Yes	2	No	1	Mild	1	Molnupiravir	0	0	1	0	0	0	3	≥ 3	Sinovac	Sinovac	Pfizer	Pfizer	N/A
93	1	Male	20	1	49	162	1.62	18.6709	2	2	B	0	No comorbidity	0	0	0	0	0	0	0	0	0	0	0	0	0	2	December 2022-August 2023	1	Yes	990		1	Mild	1	Flavipiravir	0	1	0	0	0	0	3	≥ 3	Sinovac	Sinovac	AstraZeneca	N/A	N/A
94	2	Female	48	3	60	160	1.6	23.4375	3	2	B	1	Allery, thalassemia	0	0	0	0	0	1	0	0	0	Allery, thalassemia	1	1	1	1	July- November 2022	1	Yes	2	No	2	Moderate	1	Flavipiravir	0	1	0	0	0	0	1	0	N/A	N/A	N/A	N/A	N/A
95	2	Female	32	2	53	167	1.67	19.0039	2	2	B	0	No comorbidity	0	0	0	0	0	0	0	0	0	0	0	0	0	2	December 2022-August 2023	1	Yes	2	No	1	Mild	1	Symptomatic drugs	0	0	0	1	0	0	2	1-2	Sinopharm	Sinopharm	N/A	N/A	N/A
96	1	Male	20	1	74	174	1.74	24.4418	3	5	N/A	0	No comorbidity	0	0	0	0	0	0	0	0	0	0	0	0	0	2	December 2022-August 2023	1	Yes	2	No	1	Mild	1	Andrographis, Symptomatic drugs	1	0	0	1	0	0	3	≥ 3	Sinovac	Sinovac	Pfizer	N/A	N/A
97	1	Male	30	2	68	167	1.67	24.3824	3	4	O	0	No comorbidity	0	0	0	0	0	0	0	0	0	0	0	0	0	2	December 2022-August 2023	1	Yes	2	No	1	Mild	1	Flavipiravir	0	1	0	0	0	0	3	≥ 3	Sinovac	Sinovac	Pfizer	Pfizer	N/A
98	1	Male	45	3	80	175	1.75	26.1224	4	3	AB	1	DM	0	1	0	0	0	0	0	0	0	0	1	1	1	1	July- November 2022	1	Yes	2	No	1	Mild	1	Flavipiravir	0	1	0	0	0	0	1	0	N/A	N/A	N/A	N/A	N/A
99	2	Female	28	1	82	170	1.7	28.3737	4	4	O	1	Thalassemia	0	0	0	0	0	0	0	0	1	Thalassemia	1	1	1	1	July- November 2022	1	Yes	2	No	1	Mild	1	Andrographis, Symptomatic drugs	1	0	0	1	0	0	1	0	N/A	N/A	N/A	N/A	N/A
100	1	Male	25	1	66	175	1.75	21.551	2	4	O	1	Allery	0	0	0	0	0	1	0	0	0	Allery	1	1	1	1	July- November 2022	1	Yes	990		2	Moderate	1	Flavipiravir, steroid	0	1	0	0	1	steroid	1	0	N/A	N/A	N/A	N/A	N/A
101	2	Female	47	3	78	155	1.55	32.4662	4	5	N/A	0	No comorbidity	0	0	0	0	0	0	0	0	0	0	0	0	0	1	July- November 2022	1	Yes	2	No	1	Mild	1	Symptomatic drugs	0	0	0	1	0	0	2	1-2	AstraZeneca	N/A	N/A	N/A	N/A
102	1	Male	29	1	63	165	1.65	23.1405	3	1	A	0	No comorbidity	0	0	0	0	0	0	0	0	0	0	0	0	0	2	December 2022-August 2023	1	Yes	2	No	1	Mild	1	Flavipiravir, CPM	0	1	0	0	1	CMP	3	≥ 3	Sinovac	Sinovac	AstraZeneca	Pfizer	N/A
103	1	Male	47	3	75	170	1.7	25.9516	4	5	N/A	0	No comorbidity	0	0	0	0	0	0	0	0	0	0	0	0	0	2	December 2022-August 2023	1	Yes	2	No	1	Mild	1	Flavipiravir, Symptomatic drugs	0	1	0	1	0	0	3	≥ 3	Sinovac	Sinovac	AstraZeneca	Moderna	N/A
104	1	Male	30	2	68	175	1.75	22.2041	2	5	N/A	0	No comorbidity	0	0	0	0	0	0	0	0	0	0	0	0	0	2	December 2022-August 2023	1	Yes	990		1	Mild	1	Andrographis effervescent	1	0	0	0	1	effervescent	3	≥ 3	Sinovac	Sinovac	Moderna	N/A	N/A
105	2	Female	46	3	62	151	1.51	27.1918	4	5	N/A	1	DM	0	1	0	0	0	0	0	0	0	0	1	1	1	2	December 2022-August 2023	1	Yes	2	No	1	Mild	1	Symptomatic drugs	0	0	0	1	0	0	1	0	N/A	N/A	N/A	N/A	N/A
106	1	Male	48	3	70	165	1.65	25.7117	4	4	O	0	No comorbidity	0	0	0	0	0	0	0	0	0	0	0	0	0	2	December 2022-August 2023	1	Yes	990		1	Mild	1	Symptomatic drugs	0	0	0	1	0	0	3	≥ 3	Sinovac	Sinovac	AstraZeneca	N/A	N/A
107	2	Female	25	1	42	153	1.53	17.9418	1	1	A	0	No comorbidity	0	0	0	0	0	0	0	0	0	0	0	0	0	2	December 2022-August 2023	1	Yes	2	No	2	Moderate	1	Symptomatic drugs	0	0	0	1	0	0	2	1-2	Pfizer	Pfizer	N/A	N/A	N/A
108	1	Male	41	3	61	165	1.65	22.4059	2	2	B	0	No comorbidity	0	0	0	0	0	0	0	0	0	0	0	0	0	2	December 2022-August 2023	1	Yes	2	No	1	Mild	1	Flavipiravir	0	1	0	0	0	0	3	≥ 3	Sinovac	AstraZeneca	AstraZeneca	N/A	N/A
109	2	Female	20	1	60	163	1.63	22.5827	2	1	A	0	No comorbidity	0	0	0	0	0	0	0	0	0	0	0	0	0	2	December 2022-August 2023	1	Yes	990		1	Mild	1	Symptomatic drugs	0	0	0	1	0	0	3	≥ 3	Sinovac	Sinovac	AstraZeneca	Pfizer	Pfizer
110	2	Female	38	2	65	155	1.55	27.0552	4	4	O	0	No comorbidity	0	0	0	0	0	0	0	0	0	0	0	0	0	2	December 2022-August 2023	1	Yes	990		1	Mild	1	Andrographis	1	0	0	0	0	0	3	≥ 3	Sinovac	Sinovac	AstraZeneca	Pfizer	Pfizer
111	1	Male	39	2	70	160	1.6	27.3437	4	4	O	0	No comorbidity	0	0	0	0	0	0	0	0	0	0	0	0	0	2	December 2022-August 2023	1	Yes	990		1	Mild	1	Andrographis, Symptomatic drugs	1	0	0	1	0	0	3	≥ 3	Sinovac	Sinovac	AstraZeneca	N/A	N/A
112	2	Female	51	4	60	155	1.55	24.974	4	5	N/A	0	No comorbidity	0	0	0	0	0	0	0	0	0	0	0	0	0	2	December 2022-August 2023	1	Yes	990		1	Mild	1	Symptomatic drugs	0	0	0	1	0	0	3	≥ 3	Sinovac	AstraZeneca	Pfizer	N/A	N/A
113	1	Male	46	3	75	175	1.75	24.4898	3	5	N/A	0	No comorbidity	0	0	0	0	0	0	0	0	0	0	0	0	0	2	December 2022-August 2023	1	Yes	990		1	Mild	1	Flavipiravir	0	1	0	0	0	0	3	≥ 3	Sinovac	Sinovac	AstraZeneca	Moderna	N/A
114	1	Male	59	4	52	160	1.6	20.3125	2	5	N/A	0	No comorbidity	0	0	0	0	0	0	0	0	0	0	0	0	0	2	December 2022-August 2023	1	Yes	990		1	Mild	1	Andrographis, Symptomatic drugs	1	0	0	1	0	0	3	≥ 3	AstraZeneca	AstraZeneca	Pfizer	N/A	N/A
115	2	Female	47	3	58	162	1.62	22.1003	2	4	O	0	No comorbidity	0	0	0	0	0	0	0	0	0	0	0	0	0	2	December 2022-August 2023	1	Yes	990		1	Mild	1	Flavipiravir	0	1	0	0	0	0	2	1-2	Sinovac	AstraZeneca	N/A	N/A	N/A
116	1	Male	47	3	67	165	1.65	24.6097	3	4	O	1	Hypertension	1	0	0	0	0	0	0	0	0	0	1	1	1	1	July- November 2022	1	Yes	990		1	Mild	1	Symptomatic drugs	0	0	0	1	0	0	1	0	N/A	N/A	N/A	N/A	N/A
117	1	Male	23	1	80	179	1.79	24.968	4	3	AB	0	No comorbidity	0	0	0	0	0	0	0	0	0	0	0	0	0	2	December 2022-August 2023	1	Yes	990		1	Mild	1	Andrographis, Symptomatic drugs	1	0	0	1	0	0	3	≥ 3	Sinovac	AstraZeneca	Pfizer	N/A	N/A
118	1	Male	56	4	74	170	1.7	25.6055	4	5	N/A	1	DM	0	1	0	0	0	0	0	0	0	0	1	1	1	1	July- November 2022	1	Yes	2	No	1	Mild	1	Symptomatic drugs	0	0	0	1	0	0	1	0	N/A	N/A	N/A	N/A	N/A
119	2	Female	38	2	43	150	1.5	19.1111	2	2	B	1	Allery	0	0	0	0	0	1	0	0	0	Allery	1	1	1	1	July- November 2022	1	Yes	2	No	2	Moderate	1	Flavipiravir	0	1	0	0	0	0	1	0	N/A	N/A	N/A	N/A	N/A
120	1	Male	36	2	58	160	1.6	22.6562	2	5	N/A	0	No comorbidity	0	0	0	0	0	0	0	0	0	0	0	0	0	2	December 2022-August 2023	1	Yes	990		1	Mild	1	Molnupiravir	0	0	1	0	0	0	3	≥ 3	AstraZeneca	Pfizer	Pfizer	Moderna	N/A
121	1	Male	32	2	70	157	1.57	28.3987	4	5	N/A	0	No comorbidity	0	0	0	0	0	0	0	0	0	0	0	0	0	2	December 2022-August 2023	1	Yes	990		1	Mild	1	Flavipiravir	0	1	0	0	0	0	3	≥ 3	Pfizer	Pfizer	Moderna	N/A	N/A
122	1	Male	37	2	85	173	1.73	28.4005	4	1	A	0	No comorbidity	0	0	0	0	0	0	0	0	0	0	0	0	0	2	December 2022-August 2023	1	Yes	990		1	Mild	1	Andrographis, Symptomatic drugs	1	0	0	1	0	0	3	≥ 3	AstraZeneca	AstraZeneca	Moderna	N/A	N/A
123	2	Female	62	5	65	155	1.55	27.0552	4	5	N/A	0	No comorbidity	0	0	0	0	0	0	0	0	0	0	0	0	0	1	July- November 2022	1	Yes	990		1	Mild	1	Symptomatic drugs	0	0	0	1	0	0	2	1-2	Sinovac	N/A	N/A	N/A	N/A
124	1	Male	36	2	90	170	1.7	31.1419	4	5	N/A	0	No comorbidity	0	0	0	0	0	0	0	0	0	0	0	0	0	2	December 2022-August 2023	1	Yes	990		1	Mild	1	Andrographis, Symptomatic drugs	1	0	0	1	0	0	3	≥ 3	AstraZeneca	AstraZeneca	Pfizer	Pfizer	N/A
125	1	Male	48	3	72	165	1.65	26.4463	4	5	N/A	0	No comorbidity	0	0	0	0	0	0	0	0	0	0	0	0	0	2	December 2022-August 2023	1	Yes	990		1	Mild	1	Flavipiravir	0	1	0	0	0	0	3	≥ 3	Sinovac	Sinovac	Pfizer	Pfizer	N/A
126	2	Female	28	1	68	157	1.57	27.5873	4	4	O	0	No comorbidity	0	0	0	0	0	0	0	0	0	0	0	0	0	1	July- November 2022	1	Yes	990		2	Moderate	1	Flavipiravir	0	1	0	0	0	0	2	1-2	Sinovac	Sinovac	N/A	N/A	N/A
127	1	Male	64	5	85	180	1.8	26.2346	4	2	B	1	Hypertension, Dyslipidemia	1	0	0	0	0	0	0	1	0	0	2	2	2	1	July- November 2022	1	Yes	990		1	Mild	1	Flavipiravir	0	1	0	0	0	0	1	0	N/A	N/A	N/A	N/A	N/A
128	1	Male	46	3	70	175	1.75	22.8571	2	5	N/A	0	No comorbidity	0	0	0	0	0	0	0	0	0	0	0	0	0	2	December 2022-August 2023	1	Yes	990		1	Mild	1	Symptomatic drugs	0	0	0	1	0	0	3	≥ 3	Sinovac	AstraZeneca	AstraZeneca	N/A	N/A
129	2	Female	18	1	43	155	1.55	17.898	1	4	O	0	No comorbidity	0	0	0	0	0	0	0	0	0	0	0	0	0	1	July- November 2022	1	Yes	990		1	Mild	1	Flavipiravir	0	1	0	0	0	0	2	1-2	AstraZeneca	N/A	N/A	N/A	N/A
130	2	Female	36	2	51	154	1.54	21.5045	2	2	B	0	No comorbidity	0	0	0	0	0	0	0	0	0	0	0	0	0	1	July- November 2022	1	Yes	990		1	Mild	1	Symptomatic drugs	0	0	0	1	0	0	2	1-2	Sinovac	Sinovac	N/A	N/A	N/A
131	2	Female	26	1	100	158	1.58	40.0577	4	4	O	0	No comorbidity	0	0	0	0	0	0	0	0	0	0	0	0	0	1	July- November 2022	1	Yes	990		1	Mild	1	Symptomatic drugs	0	0	0	1	0	0	2	1-2	Sinopharm	N/A	N/A	N/A	N/A
132	2	Female	57	4	65	152	1.52	28.1337	4	1	A	1	Dyslipidemia	0	0	0	0	0	0	0	0	0	0	0	0	0	2	December 2022-August 2023	1	Yes	990		2	Moderate	1	Flavipiravir	0	1	0	0	0	0	1	0	N/A	N/A	N/A	N/A	N/A
133	2	Female	28	1	54	156	1.56	22.1893	2	4	O	0	No comorbidity	0	0	0	0	0	0	0	0	0	0	0	0	0	1	July- November 2022	1	Yes	990		1	Mild	1	Flavipiravir	0	1	0	0	0	0	2	1-2	AstraZeneca	N/A	N/A	N/A	N/A
134	2	Female	33	2	100	162	1.62	38.1039	4	2	B	0	No comorbidity	0	0	0	0	0	0	0	0	0	0	0	0	0	2	December 2022-August 2023	1	Yes	990		1	Mild	1	Andrographis	1	0	0	0	0	0	2	1-2	Sinovac	AstraZeneca	N/A	N/A	N/A
135	2	Female	44	3	63	152	1.52	27.268	4	4	O	0	No comorbidity	0	0	0	0	0	0	0	0	0	0	0	0	0	1	July- November 2022	1	Yes	990		1	Mild	1	Symptomatic drugs	0	0	0	1	0	0	2	1-2	AstraZeneca	AstraZeneca	N/A	N/A	N/A
136	2	Female	61	5	71	150	1.5	31.5556	4	5	N/A	1	Hypertension	1	0	0	0	0	0	0	0	0	0	1	1	1	1	July- November 2022	1	Yes	990		2	Moderate	1	Flavipiravir	0	1	0	0	0	0	1	0	N/A	N/A	N/A	N/A	N/A
137	2	Female	34	2	61	157	1.57	24.7475	3	4	O	0	No comorbidity	0	0	0	0	0	0	0	0	0	0	0	0	0	1	July- November 2022	1	Yes	990		2	Moderate	1	Flavipiravir	0	1	0	0	0	0	2	1-2	Sinovac	N/A	N/A	N/A	N/A
138	2	Female	47	3	50	152	1.52	21.6413	2	4	O	0	No comorbidity	0	0	0	0	0	0	0	0	0	0	0	0	0	1	July- November 2022	1	Yes	990		1	Mild	1	Flavipiravir	0	1	0	0	0	0	2	1-2	AstraZeneca	AstraZeneca	N/A	N/A	N/A
139	1	Male	21	1	68	174	1.74	22.46	2	5	N/A	0	No comorbidity	0	0	0	0	0	0	0	0	0	0	0	0	0	2	December 2022-August 2023	1	Yes	990		1	Mild	1	Molnupiravir	0	0	1	0	0	0	3	≥ 3	Sinovac	Sinovac	Pfizer	Pfizer	N/A
140	2	Female	20	1	62	158	1.58	24.8358	3	3	AB	0	No comorbidity	0	0	0	0	0	0	0	0	0	0	0	0	0	1	July- November 2022	1	Yes	990		1	Mild	1	Flavipiravir	0	1	0	0	0	0	2	1-2	Sinovac	AstraZeneca	N/A	N/A	N/A
141	2	Female	57	4	84	145	1.45	39.9524	4	5	N/A	1	Hypertension, DM, Dyslipidemia	1	1	0	0	0	0	0	1	0	0	3	2	2	1	July- November 2022	1	Yes	990		1	Mild	1	Symptomatic drugs	0	0	0	1	0	0	1	0	N/A	N/A	N/A	N/A	N/A
142	1	Male	52	4	55	165	1.65	20.202	2	4	O	1	DM, Dyslipidemia	0	1	0	0	0	0	0	1	0	0	2	2	2	1	July- November 2022	1	Yes	990		2	Moderate	1	Symptomatic drugs	0	0	0	1	0	0	1	0	N/A	N/A	N/A	N/A	N/A
143	2	Female	44	3	62	158	1.58	24.8358	3	2	B	0	No comorbidity	0	0	0	0	0	0	0	0	0	0	0	0	0	1	July- November 2022	1	Yes	990		1	Mild	1	Symptomatic drugs	0	0	0	1	0	0	2	1-2	Sinovac	AstraZeneca	N/A	N/A	N/A
144	2	Female	25	1	65	160	1.6	25.3906	4	1	A	0	No comorbidity	0	0	0	0	0	0	0	0	0	0	0	0	0	1	July- November 2022	1	Yes	990		1	Mild	1	Flavipiravir	0	1	0	0	0	0	2	1-2	AstraZeneca	AstraZeneca	N/A	N/A	N/A
145	2	Female	26	1	65	165	1.65	23.8751	3	5	N/A	0	No comorbidity	0	0	0	0	0	0	0	0	0	0	0	0	0	1	July- November 2022	1	Yes	990		1	Mild	1	Symptomatic drugs	0	0	0	1	0	0	2	1-2	Moderna	Moderna	N/A	N/A	N/A
146	1	Male	40	3	72	159	1.59	28.4799	4	3	AB	0	No comorbidity	0	0	0	0	0	0	0	0	0	0	0	0	0	2	December 2022-August 2023	1	Yes	990		1	Mild	1	Molnupiravir	0	0	1	0	0	0	3	≥ 3	Sinovac	Sinovac	Pfizer	Pfizer	N/A
147	2	Female	38	2	65	164	1.64	24.1672	3	4	O	0	No comorbidity	0	0	0	0	0	0	0	0	0	0	0	0	0	1	July- November 2022	1	Yes	990		1	Mild	1	Flavipiravir	0	1	0	0	0	0	2	1-2	AstraZeneca	N/A	N/A	N/A	N/A
148	2	Female	26	1	100	165	1.65	36.7309	4	1	A	0	No comorbidity	0	0	0	0	0	0	0	0	0	0	0	0	0	1	July- November 2022	1	Yes	990		1	Mild	1	Flavipiravir, Symptomatic drugs	0	1	0	1	0	0	2	1-2	Sinovac	N/A	N/A	N/A	N/A
149	1	Male	18	1	58	171	1.71	19.8352	2	4	O	0	No comorbidity	0	0	0	0	0	0	0	0	0	0	0	0	0	2	December 2022-August 2023	1	Yes	2	No	1	Mild	1	Symptomatic drugs	0	0	0	1	0	0	3	≥ 3	Sinovac	Sinovac	Pfizer	Pfizer	N/A
150	2	Female	22	1	52	162	1.62	19.8141	2	2	B	0	No comorbidity	0	0	0	0	0	0	0	0	0	0	0	0	0	2	December 2022-August 2023	1	Yes	990		1	Mild	1	Flavipiravir	0	1	0	0	0	0	2	1-2	Sinovac	Sinovac	N/A	N/A	N/A
151	2	Female	42	3	60	158	1.58	24.0346	3	4	O	0	No comorbidity	0	0	0	0	0	0	0	0	0	0	0	0	0	2	December 2022-August 2023	1	Yes	990		1	Mild	1	Flavipiravir	0	1	0	0	0	0	2	1-2	Sinovac	AstraZeneca	N/A	N/A	N/A
152	1	Male	35	2	100	170	1.7	34.6021	4	5	N/A	1	Ashma	0	0	0	0	0	1	0	0	0	0	1	1	1	2	December 2022-August 2023	1	Yes	990		1	Mild	1	Molnupiravir	0	0	1	0	0	0	3	≥ 3	Sinovac	Pfizer	Pfizer	N/A	N/A
153	2	Female	64	5	56	150	1.5	24.8889	3	4	O	0	No comorbidity	0	0	0	0	0	0	0	0	0	0	0	0	0	2	December 2022-August 2023	1	Yes	990		1	Mild	1	Flavipiravir, Symptomatic drugs	0	1	0	1	0	0	2	1-2	Pfizer	Pfizer	N/A	N/A	N/A
154	1	Male	24	1	50	169	1.69	17.5064	1	3	AB	0	No comorbidity	0	0	0	0	0	0	0	0	0	0	0	0	0	2	December 2022-August 2023	1	Yes	2	No	1	Mild	1	Andrographis	1	0	0	0	0	0	3	≥ 3	Sinovac	Sinovac	AstraZeneca	Pfizer	Pfizer
155	2	Female	34	2	51	155	1.55	21.2279	2	5	N/A	0	No comorbidity	0	0	0	0	0	0	0	0	0	0	0	0	0	2	December 2022-August 2023	1	Yes	990		1	Mild	1	Symptomatic drugs	0	0	0	1	0	0	2	1-2	Sinovac	Sinovac	N/A	N/A	N/A
156	2	Female	32	2	85	158	1.58	34.049	4	3	AB	1	Hypertension	1	0	0	0	0	0	0	0	0	0	1	1	1	1	July- November 2022	1	Yes	990		2	Moderate	1	Flavipiravir	0	1	0	0	0	0	1	0	N/A	N/A	N/A	N/A	N/A
157	1	Male	25	1	70	170	1.7	24.2215	3	4	O	0	No comorbidity	0	0	0	0	0	0	0	0	0	0	0	0	0	2	December 2022-August 2023	1	Yes	2	No	1	Mild	1	Symptomatic drugs	0	0	0	1	0	0	3	≥ 3	Sinovac	AstraZeneca	N/A	N/A	N/A
158	1	Male	21	1	54	178	1.78	17.0433	1	5	N/A	0	No comorbidity	0	0	0	0	0	0	0	0	0	0	0	0	0	2	December 2022-August 2023	1	Yes	2	No	1	Mild	1	Symptomatic drugs	0	0	0	1	0	0	3	≥ 3	Sinovac	Sinovac	AstraZeneca	N/A	N/A
159	2	Female	42	3	54	160	1.6	21.0937	2	3	AB	0	No comorbidity	0	0	0	0	0	0	0	0	0	0	0	0	0	2	December 2022-August 2023	1	Yes	990		1	Mild	1	Symptomatic drugs	0	0	0	1	0	0	2	1-2	Sinovac	AstraZeneca	N/A	N/A	N/A
160	2	Female	26	1	49	167	1.67	17.5697	1	4	O	0	No comorbidity	0	0	0	0	0	0	0	0	0	0	0	0	0	2	December 2022-August 2023	1	Yes	990		1	Mild	1	Symptomatic drugs	0	0	0	1	0	0	2	1-2	Sinovac	Sinovac	N/A	N/A	N/A
161	2	Female	19	1	49	165	1.65	17.9982	1	4	O	0	No comorbidity	0	0	0	0	0	0	0	0	0	0	0	0	0	2	December 2022-August 2023	1	Yes	990		1	Mild	1	Flavipiravir	0	1	0	0	0	0	2	1-2	Sinopharm	Sinopharm	N/A	N/A	N/A
162	1	Male	32	2	78	168	1.68	27.6361	4	3	AB	0	No comorbidity	0	0	0	0	0	0	0	0	0	0	0	0	0	2	December 2022-August 2023	1	Yes	2	No	1	Mild	1	Andrographis, Symptomatic drugs	1	0	0	1	0	0	3	≥ 3	Sinovac	Sinovac	AstraZeneca	N/A	N/A
163	2	Female	37	2	76	165	1.65	27.9155	4	2	B	0	No comorbidity	0	0	0	0	0	0	0	0	0	0	0	0	0	2	December 2022-August 2023	1	Yes	990		1	Mild	1	Andrographis	1	0	0	0	0	0	2	1-2	Sinovac	AstraZeneca	N/A	N/A	N/A
164	2	Female	30	2	57	155	1.55	23.7253	3	4	O	0	No comorbidity	0	0	0	0	0	0	0	0	0	0	0	0	0	2	December 2022-August 2023	1	Yes	990		1	Mild	1	Andrographis, Symptomatic drugs	1	0	0	1	0	0	2	1-2	Sinovac	AstraZeneca	N/A	N/A	N/A
165	1	Male	20	1	53	165	1.65	19.4674	2	5	N/A	0	No comorbidity	0	0	0	0	0	0	0	0	0	0	0	0	0	2	December 2022-August 2023	1	Yes	2	No	1	Mild	1	Flavipiravir	0	1	0	0	0	0	3	≥ 3	Sinovac	Pfizer	Pfizer	N/A	N/A
166	2	Female	45	3	62	160	1.6	24.2187	3	5	N/A	1	Hypertension, DM	1	1	0	0	0	0	0	0	0	0	2	2	1	1	July- November 2022	1	Yes	990		1	Mild	1	Flavipiravir	0	1	0	0	0	0	1	0	N/A	N/A	N/A	N/A	N/A
167	2	Female	30	2	60	158	1.58	24.0346	3	4	O	0	No comorbidity	0	0	0	0	0	0	0	0	0	0	0	0	0	2	December 2022-August 2023	1	Yes	990		1	Mild	1	Symptomatic drugs	0	0	0	1	0	0	2	1-2	Sinovac	AstraZeneca	N/A	N/A	N/A
168	1	Male	37	2	125	162	1.62	47.6299	4	4	O	0	No comorbidity	0	0	0	0	0	0	0	0	0	0	0	0	0	2	December 2022-August 2023	1	Yes	2	No	1	Mild	1	Andrographis, Symptomatic drugs	1	0	0	1	0	0	3	≥ 3	Sinovac	AstraZeneca	Pfizer	N/A	N/A
169	2	Female	32	2	55	165	1.65	20.202	2	4	O	0	No comorbidity	0	0	0	0	0	0	0	0	0	0	0	0	0	2	December 2022-August 2023	1	Yes	990		1	Mild	1	Andrographis, Symptomatic drugs	1	0	0	1	0	0	2	1-2	Sinovac	Pfizer	N/A	N/A	N/A
170	2	Female	26	1	65	153	1.53	27.7671	4	2	B	0	No comorbidity	0	0	0	0	0	0	0	0	0	0	0	0	0	2	December 2022-August 2023	1	Yes	990		1	Mild	1	Flavipiravir	0	1	0	0	0	0	2	1-2	AstraZeneca	N/A	N/A	N/A	N/A
171	1	Male	62	5	78	172	1.72	26.3656	4	4	O	1	Peptic ulcer	0	0	0	0	0	0	0	0	1	Peptic ulcer	1	1	1	2	December 2022-August 2023	1	Yes	990		1	Mild	1	Flavipiravir	0	1	0	0	0	0	1	0	N/A	N/A	N/A	N/A	N/A
172	2	Female	62	5	68	155	1.55	28.3039	4	3	AB	1	Hypertension, DM	1	1	0	0	0	0	0	0	0	0	2	2	1	1	July- November 2022	1	Yes	990		1	Mild	1	Flavipiravir	0	1	0	0	0	0	1	0	N/A	N/A	N/A	N/A	N/A
173	2	Female	52	4	55	155	1.55	22.8928	2	2	B	1	Hypertension, DM	1	1	0	0	0	0	0	0	0	0	2	2	1	1	July- November 2022	1	Yes	990		2	Moderate	1	Flavipiravir	0	1	0	0	0	0	1	0	N/A	N/A	N/A	N/A	N/A
174	1	Male	31	2	59	170	1.7	20.4152	2	4	O	0	No comorbidity	0	0	0	0	0	0	0	0	0	0	0	0	0	2	December 2022-August 2023	1	Yes	2	No	1	Mild	1	Flavipiravir	0	1	0	0	0	0	3	≥ 3	Sinovac	Sinovac	Pfizer	N/A	N/A
175	2	Female	56	4	53	155	1.55	22.0604	2	2	B	1	Hypertension, Dyslipidemia	1	0	0	0	0	0	0	1	0	0	2	2	2	1	July- November 2022	1	Yes	990		1	Mild	1	Flavipiravir	0	1	0	0	0	0	1	0	N/A	N/A	N/A	N/A	N/A
176	1	Male	59	4	65	143	1.43	31.7864	4	5	N/A	1	Hypertension, Dyslipidemia	1	0	0	0	0	0	0	1	0	0	2	2	2	1	July- November 2022	1	Yes	990		1	Mild	1	Andrographis, Symptomatic drugs	1	0	0	1	0	0	1	0	N/A	N/A	N/A	N/A	N/A
177	2	Female	24	1	52	155	1.55	21.6441	2	1	A	0	No comorbidity	0	0	0	0	0	0	0	0	0	0	0	0	0	2	December 2022-August 2023	1	Yes	990		1	Mild	1	Andrographis, Symptomatic drugs	1	0	0	1	0	0	2	1-2	Pfizer	Pfizer	N/A	N/A	N/A
178	2	Female	23	1	50	160	1.6	19.5312	2	3	AB	0	No comorbidity	0	0	0	0	0	0	0	0	0	0	0	0	0	1	July- November 2022	1	Yes	2	No	1	Mild	1	Symptomatic drugs	0	0	0	1	0	0	2	1-2	Sinopharm	Sinopharm	N/A	N/A	N/A
179	2	Female	53	4	46	150	1.5	20.4444	2	2	B	1	DM	0	1	0	0	0	0	0	0	0	0	1	1	1	1	July- November 2022	1	Yes	2	No	1	Mild	1	Symptomatic drugs	0	0	0	1	0	0	1	0	N/A	N/A	N/A	N/A	N/A
180	2	Female	38	2	63	153	1.53	26.9127	4	4	O	1	Thalassemia	0	0	0	0	0	0	0	0	1	Thalassemia	1	1	1	1	July- November 2022	1	Yes	990		2	Moderate	1	Symptomatic drugs	0	0	0	1	0	0	1	0	N/A	N/A	N/A	N/A	N/A
181	2	Female	40	3	57	160	1.6	22.2656	2	1	A	0	No comorbidity	0	0	0	0	0	0	0	0	0	0	0	0	0	2	December 2022-August 2023	1	Yes	2	No	1	Mild	1	Flavipiravir	0	1	0	0	0	0	2	1-2	Sinopharm	Sinopharm	N/A	N/A	N/A
182	1	Male	49	3	71	162	1.62	27.0538	4	4	O	1	Hypertension, DM	1	1	0	0	0	0	0	0	0	0	2	2	1	1	July- November 2022	1	Yes	990		3	Severe	1	Andrographis, Flavipiravir, Symptomatic drugs, steroid	1	1	0	1	1	steroid	1	0	N/A	N/A	N/A	N/A	N/A
183	2	Female	18	1	62	150	1.5	27.5556	4	5	N/A	0	No comorbidity	0	0	0	0	0	0	0	0	0	0	0	0	0	1	July- November 2022	1	Yes	2	No	1	Mild	1	Symptomatic drugs	0	0	0	1	0	0	2	1-2	Sinovac	N/A	N/A	N/A	N/A
184	2	Female	47	3	50	158	1.58	20.0288	2	1	A	0	No comorbidity	0	0	0	0	0	0	0	0	0	0	0	0	0	1	July- November 2022	1	Yes	2	No	1	Mild	1	Symptomatic drugs	0	0	0	1	0	0	2	1-2	Sinovac	N/A	N/A	N/A	N/A
185	2	Female	58	4	46	150	1.5	20.4444	2	3	AB	0	No comorbidity	0	0	0	0	0	0	0	0	0	0	0	0	0	1	July- November 2022	1	Yes	2	No	2	Moderate	1	Flavipiravir, steroid	0	1	0	0	1	steroid	2	1-2	Sinovac	Sinovac	N/A	N/A	N/A
186	2	Female	66	5	54	150	1.5	24	3	5	N/A	1	Hyperthyriod	0	0	0	0	1	0	0	0	0	0	1	1	1	2	December 2022-August 2023	1	Yes	2	No	1	Mild	1	Symptomatic drugs	0	0	0	1	0	0	2	1-2	Sinovac	AstraZeneca	N/A	N/A	N/A
187	2	Female	29	1	67	171	1.71	22.913	2	4	O	0	No comorbidity	0	0	0	0	0	0	0	0	0	0	0	0	0	1	July- November 2022	1	Yes	2	No	1	Mild	1	Symptomatic drugs	0	0	0	1	0	0	2	1-2	AstraZeneca	N/A	N/A	N/A	N/A
188	2	Female	60	5	60	155	1.55	24.974	4	4	O	1	Hypertension, DM	1	1	0	0	0	0	0	0	0	0	2	2	1	1	July- November 2022	1	Yes	990		1	Mild	1	Symptomatic drugs	0	0	0	1	0	0	1	0	N/A	N/A	N/A	N/A	N/A
189	2	Female	44	3	77	153	1.53	32.8933	4	2	B	1	Allery	0	0	0	0	0	1	0	0	0	Allery	1	1	1	1	July- November 2022	1	Yes	2	No	3	Severe	1	Andrographis, Symptomatic drugs	1	0	0	1	0	0	1	0	N/A	N/A	N/A	N/A	N/A
190	2	Female	66	5	63	160	1.6	24.6094	3	2	B	1	Hypertension	1	0	0	0	0	0	0	0	0	0	1	1	1	1	July- November 2022	1	Yes	990		1	Mild	1	Flavipiravir	0	1	0	0	0	0	1	0	N/A	N/A	N/A	N/A	N/A
191	2	Female	56	4	58	150	1.5	25.7778	4	5	N/A	1	Hypertension, Dyslipidemia, Gall bladder	1	0	0	0	0	0	0	1	1	Gall bladder	3	2	2	1	July- November 2022	1	Yes	990		1	Mild	1	Symptomatic drugs	0	0	0	1	0	0	1	0	N/A	N/A	N/A	N/A	N/A
192	2	Female	55	4	43	155	1.55	17.898	1	4	O	0	No comorbidity	0	0	0	0	0	0	0	0	0	0	0	0	0	2	December 2022-August 2023	1	Yes	2	No	1	Mild	1	Symptomatic drugs	0	0	0	1	0	0	2	1-2	AstraZeneca	N/A	N/A	N/A	N/A
193	2	Female	59	4	62	150	1.5	27.5556	4	1	A	1	Hypertension	1	0	0	0	0	0	0	0	0	0	1	1	1	1	July- November 2022	1	Yes	990		3	Severe	1	Symptomatic drugs	0	0	0	1	0	0	1	0	N/A	N/A	N/A	N/A	N/A
194	1	Male	23	1	55	178	1.78	17.3589	1	1	A	1	Allery	0	0	0	0	0	1	0	0	0	Allery	1	1	1	1	July- November 2022	1	Yes	2	No	2	Moderate	1	Flavipiravir	0	1	0	0	0	0	1	0	N/A	N/A	N/A	N/A	N/A
195	2	Female	65	5	66	150	1.5	29.3333	4	2	B	1	Hypertension, Dyslipidemia, Hyperthyroid	1	0	0	0	1	0	0	1	0	0	3	2	2	1	July- November 2022	1	Yes	990		1	Mild	1	Flavipiravir, Symptomatic drugs	0	1	0	1	0	0	1	0	N/A	N/A	N/A	N/A	N/A
196	2	Female	47	3	56	154	1.54	23.6128	3	2	B	1	Allery	0	0	0	0	0	1	0	0	0	Allery	1	1	1	1	July- November 2022	1	Yes	2	No	1	Mild	1	Flavipiravir	0	1	0	0	0	0	1	0	N/A	N/A	N/A	N/A	N/A
197	1	Male	25	1	104	184	1.84	30.7183	4	4	O	0	No comorbidity	0	0	0	0	0	0	0	0	0	0	0	0	0	2	December 2022-August 2023	1	Yes	2	No	1	Mild	1	Symptomatic drugs	0	0	0	1	0	0	3	≥ 3	Sinovac	AstraZeneca	AstraZeneca	N/A	N/A
198	1	Male	30	2	76	175	1.75	24.8163	3	2	B	0	No comorbidity	0	0	0	0	0	0	0	0	0	0	0	0	0	2	December 2022-August 2023	1	Yes	2	No	1	Mild	1	Flavipiravir	0	1	0	0	0	0	3	≥ 3	Sinovac	AstraZeneca	Pfizer	N/A	N/A
199	1	Male	61	5	63	165	1.65	23.1405	3	5	N/A	1	Heart disease	0	0	1	0	0	0	0	0	0	0	1	1	1	2	December 2022-August 2023	1	Yes	2	No	1	Mild	1	Symptomatic drugs	0	0	0	1	0	0	2	1-2	Sinovac	AstraZeneca	N/A	N/A	N/A
200	1	Male	21	1	70	170	1.7	24.2215	3	2	B	0	No comorbidity	0	0	0	0	0	0	0	0	0	0	0	0	0	2	December 2022-August 2023	1	Yes	2	No	2	Moderate	1	Flavipiravir	0	1	0	0	0	0	3	≥ 3	Sinovac	Sinovac	N/A	N/A	N/A
201	2	Female	43	3	40	155	1.55	16.6493	1	4	O	1	Cancer	0	0	0	0	0	0	1	0	0	0	1	1	1	1	July- November 2022	1	Yes	2	No	1	Mild	1	Symptomatic drugs	0	0	0	1	0	0	1	0	N/A	N/A	N/A	N/A	N/A
202	2	Female	49	3	50	150	1.5	22.2222	2	4	O	1	Dyslipidemia	0	0	0	0	0	0	0	1	0	0	1	1	1	1	July- November 2022	1	Yes	2	No	2	Moderate	1	Flavipiravir	0	1	0	0	0	0	1	0	N/A	N/A	N/A	N/A	N/A
203	2	Female	74	5	57	155	1.55	23.7253	3	5	N/A	1	Hypertension, DM, Dyslipidemia	1	1	0	0	0	0	0	1	0	0	3	2	2	1	July- November 2022	1	Yes	990		1	Mild	1	Andrographis, Symptomatic drugs	1	0	0	1	0	0	1	0	N/A	N/A	N/A	N/A	N/A
204	1	Male	29	1	67	170	1.7	23.1834	3	1	A	0	No comorbidity	0	0	0	0	0	0	0	0	0	0	0	0	0	2	December 2022-August 2023	1	Yes	2	No	1	Mild	1	Symptomatic drugs	0	0	0	1	0	0	3	≥ 3	Sinovac	Sinovac	AstraZeneca	Pfizer	N/A
205	1	Male	45	3	87	178	1.78	27.4587	4	4	O	0	No comorbidity	0	0	0	0	0	0	0	0	0	0	0	0	0	2	December 2022-August 2023	1	Yes	2	No	1	Mild	1	Symptomatic drugs	0	0	0	1	0	0	3	≥ 3	Sinovac	Sinovac	Pfizer	Pfizer	N/A
206	2	Female	26	1	50	161	1.61	19.2894	2	2	B	0	No comorbidity	0	0	0	0	0	0	0	0	0	0	0	0	0	2	December 2022-August 2023	1	Yes	2	No	1	Mild	1	Symptomatic drugs	0	0	0	1	0	0	2	1-2	AstraZeneca	AstraZeneca	N/A	N/A	N/A
207	2	Female	25	1	55	165	1.65	20.202	2	1	A	0	No comorbidity	0	0	0	0	0	0	0	0	0	0	0	0	0	1	July- November 2022	1	Yes	2	No	3	Severe	1	Flavipiravir	0	1	0	0	0	0	2	1-2	Pfizer	N/A	N/A	N/A	N/A
208	2	Female	47	3	50	157	1.57	20.2848	2	4	O	0	No comorbidity	0	0	0	0	0	0	0	0	0	0	0	0	0	1	July- November 2022	1	Yes	2	No	1	Mild	1	Andrographis, Symptomatic drugs	1	0	0	1	0	0	2	1-2	Sinovac	Sinovac	N/A	N/A	N/A
209	2	Female	25	1	56	164	1.64	20.8209	2	2	B	0	No comorbidity	0	0	0	0	0	0	0	0	0	0	0	0	0	1	July- November 2022	1	Yes	2	No	1	Mild	1	Symptomatic drugs	0	0	0	1	0	0	2	1-2	Sinovac	N/A	N/A	N/A	N/A
210	2	Female	57	4	52	152	1.52	22.5069	2	2	B	0	No comorbidity	0	0	0	0	0	0	0	0	0	0	0	0	0	1	July- November 2022	1	Yes	2	No	1	Mild	1	Flavipiravir, Symptomatic drugs	0	1	0	1	0	0	2	1-2	Sinovac	Sinovac	N/A	N/A	N/A
211	2	Female	26	1	68	157	1.57	27.5873	4	4	O	1	Ashma	0	0	0	0	0	1	0	0	0	0	1	1	1	2	December 2022-August 2023	1	Yes	990		1	Mild	1	Flavipiravir	0	1	0	0	0	0	2	1-2	Sinovac	Sinovac	N/A	N/A	N/A
212	2	Female	29	1	70	163	1.63	26.3465	4	2	B	0	No comorbidity	0	0	0	0	0	0	0	0	0	0	0	0	0	1	July- November 2022	1	Yes	2	No	1	Mild	1	Flavipiravir	0	1	0	0	0	0	2	1-2	Sinovac	AstraZeneca	N/A	N/A	N/A
213	1	Male	37	2	91	175	1.75	29.7143	4	2	B	1	Hypertension	1	0	0	0	0	0	0	0	0	0	1	1	1	1	July- November 2022	1	Yes	990		1	Mild	1	Andrographis, Symptomatic drugs	1	0	0	1	0	0	1	0	N/A	N/A	N/A	N/A	N/A
214	2	Female	32	2	58	164	1.64	21.5645	2	2	B	1	Allery	0	0	0	0	0	1	0	0	0	Allery	1	1	1	1	July- November 2022	1	Yes	2	No	1	Mild	1	Flavipiravir	0	1	0	0	0	0	1	0	N/A	N/A	N/A	N/A	N/A
215	2	Female	31	2	60	160	1.6	23.4375	3	2	B	0	No comorbidity	0	0	0	0	0	0	0	0	0	0	0	0	0	1	July- November 2022	1	Yes	2	No	1	Mild	1	Flavipiravir	0	1	0	0	0	0	2	1-2	AstraZeneca	N/A	N/A	N/A	N/A
216	2	Female	24	1	55	158	1.58	22.0317	2	1	A	0	No comorbidity	0	0	0	0	0	0	0	0	0	0	0	0	0	1	July- November 2022	1	Yes	2	No	1	Mild	1	Andrographis, Symptomatic drugs	1	0	0	1	0	0	2	1-2	Sinovac	N/A	N/A	N/A	N/A
217	1	Male	55	4	85	165	1.65	31.2213	4	3	AB	0	No comorbidity	0	0	0	0	0	0	0	0	0	0	0	0	0	2	December 2022-August 2023	1	Yes	2	No	1	Mild	1	Symptomatic drugs	0	0	0	1	0	0	3	≥ 3	Sinovac	AstraZeneca	AstraZeneca	N/A	N/A
218	1	Male	32	2	72	180	1.8	22.2222	2	4	O	0	No comorbidity	0	0	0	0	0	0	0	0	0	0	0	0	0	2	December 2022-August 2023	1	Yes	2	No	1	Mild	1	Symptomatic drugs	0	0	0	1	0	0	3	≥ 3	AstraZeneca	AstraZeneca	Pfizer	N/A	N/A
219	2	Female	27	1	53	153	1.53	22.6409	2	4	O	0	No comorbidity	0	0	0	0	0	0	0	0	0	0	0	0	0	1	July- November 2022	1	Yes	2	No	1	Mild	1	Flavipiravir	0	1	0	0	0	0	2	1-2	Sinovac	AstraZeneca	N/A	N/A	N/A
220	2	Female	38	2	46	155	1.55	19.1467	2	2	B	1	Migrane	0	0	0	0	0	0	0	0	1	Migrane	1	1	1	1	July- November 2022	1	Yes	2	No	2	Moderate	1	Flavipiravir	0	1	0	0	0	0	1	0	N/A	N/A	N/A	N/A	N/A
221	1	Male	50	4	60	160	1.6	23.4375	3	5	N/A	0	No comorbidity	0	0	0	0	0	0	0	0	0	0	0	0	0	2	December 2022-August 2023	1	Yes	2	No	1	Mild	1	Andrographis, Symptomatic drugs	1	0	0	1	0	0	3	≥ 3	Sinovac	AstraZeneca	AstraZeneca	N/A	N/A
222	2	Female	36	2	63	160	1.6	24.6094	3	4	O	1	Hyperthyriod	0	0	0	0	1	0	0	0	0	0	1	1	1	2	December 2022-August 2023	1	Yes	2	No	1	Mild	1	Symptomatic drugs	0	0	0	1	0	0	2	1-2	Sinovac	AstraZeneca	N/A	N/A	N/A
223	1	Male	61	5	70	176	1.76	22.5981	2	5	N/A	1	kidney disease	0	0	0	0	0	0	0	0	1	kidney disease	1	1	1	1	July- November 2022	1	Yes	2	No	1	Mild	1	Flavipiravir	0	1	0	0	0	0	1	0	N/A	N/A	N/A	N/A	N/A
224	1	Male	38	2	56	165	1.65	20.5693	2	4	O	0	No comorbidity	0	0	0	0	0	0	0	0	0	0	0	0	0	2	December 2022-August 2023	1	Yes	2	No	1	Mild	1	Andrographis, Symptomatic drugs	1	0	0	1	0	0	3	≥ 3	Sinopharm	Sinopharm	Pfizer	N/A	N/A
225	2	Female	24	1	73	160	1.6	28.5156	4	4	O	0	No comorbidity	0	0	0	0	0	0	0	0	0	0	0	0	0	1	July- November 2022	1	Yes	2	No	2	Moderate	1	Flavipiravir	0	1	0	0	0	0	2	1-2	Sinopharm	N/A	N/A	N/A	N/A
226	2	Female	27	1	48	161	1.61	18.5178	2	2	B	0	No comorbidity	0	0	0	0	0	0	0	0	0	0	0	0	0	1	July- November 2022	1	Yes	2	No	2	Moderate	1	Flavipiravir	0	1	0	0	0	0	2	1-2	Sinovac	N/A	N/A	N/A	N/A
227	1	Male	26	1	88	167	1.67	31.5537	4	2	B	0	No comorbidity	0	0	0	0	0	0	0	0	0	0	0	0	0	2	December 2022-August 2023	1	Yes	2	No	1	Mild	1	Symptomatic drugs	0	0	0	1	0	0	3	≥ 3	Sinovac	Sinovac	Moderna	Pfizer	N/A
228	2	Female	36	2	45	162	1.62	17.1468	1	4	O	0	No comorbidity	0	0	0	0	0	0	0	0	0	0	0	0	0	2	December 2022-August 2023	1	Yes	2	No	1	Mild	1	Flavipiravir	0	1	0	0	0	0	2	1-2	AstraZeneca	AstraZeneca	N/A	N/A	N/A
229	2	Female	58	4	90	150	1.5	40	4	4	O	1	Hypertension, DM, Dyslipidemia	1	1	0	0	0	0	0	1	0	0	3	2	2	1	July- November 2022	1	Yes	990		3	Severe	1	Flavipiravir	0	1	0	0	0	0	1	0	N/A	N/A	N/A	N/A	N/A
230	2	Female	39	2	70	160	1.6	27.3437	4	2	B	0	No comorbidity	0	0	0	0	0	0	0	0	0	0	0	0	0	2	December 2022-August 2023	1	Yes	2	No	1	Mild	1	Flavipiravir, Symptomatic drugs	0	1	0	1	0	0	2	1-2	Sinovac	AstraZeneca	N/A	N/A	N/A
231	2	Female	36	2	55	158	1.58	22.0317	2	3	AB	1	Hepatitis B	0	0	0	0	0	0	0	0	1	Hepatitis B	1	1	1	2	December 2022-August 2023	1	Yes	2	No	1	Mild	1	Flavipiravir	0	1	0	0	0	0	2	1-2	Sinovac	AstraZeneca	N/A	N/A	N/A
232	1	Male	65	5	70	160	1.6	27.3437	4	5	N/A	1	Hypertension, Heart disease, gout	1	0	1	0	0	0	0	0	1	Gout	3	2	2	1	July- November 2022	1	Yes	990		1	Mild	1	Andrographis, Symptomatic drugs	1	0	0	1	0	0	1	0	N/A	N/A	N/A	N/A	N/A
233	2	Female	31	2	60	167	1.67	21.5139	2	2	B	0	No comorbidity	0	0	0	0	0	0	0	0	0	0	0	0	0	2	December 2022-August 2023	1	Yes	2	No	1	Mild	1	Symptomatic drugs	0	0	0	1	0	0	2	1-2	AstraZeneca	AstraZeneca	N/A	N/A	N/A
234	1	Male	45	3	90	168	1.68	31.8878	4	1	A	0	No comorbidity	0	0	0	0	0	0	0	0	0	0	0	0	0	2	December 2022-August 2023	1	Yes	2	No	1	Mild	1	Symptomatic drugs	0	0	0	1	0	0	3	≥ 3	Moderna	Moderna	Moderna	N/A	N/A
235	1	Male	26	1	53	165	1.65	19.4674	2	4	O	0	No comorbidity	0	0	0	0	0	0	0	0	0	0	0	0	0	2	December 2022-August 2023	1	Yes	990		1	Mild	1	Symptomatic drugs	0	0	0	1	0	0	3	≥ 3	Sinovac	Sinovac	Pfizer	Pfizer	N/A
236	1	Male	19	1	130	165	1.65	47.7502	4	2	B	0	No comorbidity	0	0	0	0	0	0	0	0	0	0	0	0	0	2	December 2022-August 2023	1	Yes	2	No	1	Mild	1	Andrographis	1	0	0	0	0	0	3	≥ 3	Sinovac	Sinovac	Pfizer	Pfizer	N/A
237	1	Male	37	2	84	172	1.72	28.3937	4	3	AB	0	No comorbidity	0	0	0	0	0	0	0	0	0	0	0	0	0	2	December 2022-August 2023	1	Yes	2	No	1	Mild	1	Andrographis	1	0	0	0	0	0	3	≥ 3	Sinovac	Sinovac	Pfizer	Pfizer	N/A
238	2	Female	29	1	52	162	1.62	19.8141	2	4	O	0	No comorbidity	0	0	0	0	0	0	0	0	0	0	0	0	0	2	December 2022-August 2023	1	Yes	2	No	1	Mild	1	Flavipiravir, Symptomatic drugs	0	1	0	1	0	0	2	1-2	Sinovac	AstraZeneca	N/A	N/A	N/A
239	1	Male	76	5	64	168	1.68	22.6757	2	4	O	1	Hypertension, Stroke, Cancer	1	0	0	1	0	0	0	0	0	0	2	2	1	1	July- November 2022	1	Yes	990		2	Moderate	1	Flavipiravir, Symptomatic drugs	0	1	0	1	0	0	1	0	N/A	N/A	N/A	N/A	N/A
240	1	Male	45	3	79	160	1.6	30.8594	4	5	N/A	0	No comorbidity	0	0	0	0	0	0	0	0	0	0	0	0	0	2	December 2022-August 2023	1	Yes	2	No	1	Mild	1	Symptomatic drugs	0	0	0	1	0	0	3	≥ 3	Sinovac	Sinovac	Pfizer	Pfizer	N/A
241	2	Female	24	1	58	162	1.62	22.1003	2	4	O	0	No comorbidity	0	0	0	0	0	0	0	0	0	0	0	0	0	2	December 2022-August 2023	1	Yes	2	No	1	Mild	1	Flavipiravir	0	1	0	0	0	0	2	1-2	Sinopharm	Sinopharm	N/A	N/A	N/A
242	2	Female	26	1	58	163	1.63	21.83	2	4	O	0	No comorbidity	0	0	0	0	0	0	0	0	0	0	0	0	0	2	December 2022-August 2023	1	Yes	2	No	1	Mild	1	Symptomatic drugs	0	0	0	1	0	0	2	1-2	Sinovac	AstraZeneca	N/A	N/A	N/A
243	2	Female	29	1	39	164	1.64	14.5003	1	2	B	1	spastic paraparesis	0	0	0	0	0	0	0	0	1	spastic paraparesis	1	1	1	2	December 2022-August 2023	1	Yes	2	No	2	Moderate	1	Flavipiravir	0	1	0	0	0	0	1	0	N/A	N/A	N/A	N/A	N/A
244	2	Female	29	1	48	160	1.6	18.75	2	2	B	0	No comorbidity	0	0	0	0	0	0	0	0	0	0	0	0	0	2	December 2022-August 2023	1	Yes	2	No	1	Mild	1	Flavipiravir	0	1	0	0	0	0	2	1-2	Sinovac	AstraZeneca	N/A	N/A	N/A
245	2	Female	26	1	46	158	1.58	18.4265	1	4	O	0	No comorbidity	0	0	0	0	0	0	0	0	0	0	0	0	0	2	December 2022-August 2023	1	Yes	2	No	1	Mild	1	Symptomatic drugs	0	0	0	1	0	0	2	1-2	Sinovac	AstraZeneca	N/A	N/A	N/A
246	2	Female	25	1	58	158	1.58	23.2335	3	2	B	0	No comorbidity	0	0	0	0	0	0	0	0	0	0	0	0	0	2	December 2022-August 2023	1	Yes	2	No	1	Mild	1	Flavipiravir	0	1	0	0	0	0	2	1-2	Moderna	Moderna	N/A	N/A	N/A
247	2	Female	31	2	53.5	150	1.5	23.7778	3	4	O	0	No comorbidity	0	0	0	0	0	0	0	0	0	0	0	0	0	2	December 2022-August 2023	1	Yes	2	No	2	Moderate	1	Symptomatic drugs	0	0	0	1	0	0	2	1-2	Sinopharm	Sinopharm	N/A	N/A	N/A
[truncated: 12 more columns]

## Sheet: Book Code 
Participation ID	Code_Gender	Gender	Age (Y)	Weight (Kg)	Height (cm)	Code_Blood group	Blood group	Code_Comorbidity	Comorbidity disease (can select more than 1 option)	A6.1_Hypertension	A6.2_DM	A6.3_Heart Dz.	A6.4_Stroke	A6.5_Tyroid	A6.6_ Ashma	A6.7_Cancer	A6.8_Dyslipidemia	A6.9_others	A6.9_Specify	Code_Time of COVID-19 disease	Time of COVID-19 disease	Code_ First COVID-19 infection	First COVID-19 infection	Code_ Infection during pregnant	Infection during pregnant	Code_Disease severity	Disease severity	Code_No. of Drugs for treatment	Drugs for treatment	C1.1_Andrographis	C1.2_ Favipiravir	C1.3_ Molnupiravir	C1.4_ Symptomatic drugs	C1.5_Others	C1.5_Specify	Code_No. of vaccination	No. of vaccination	1st dose vccinationa	2nd dose vccinationa	3rd dose vccinationa	4th dose vccinationa	5th dose vccinationa	Code_ lastest vaccine type	Code_Presence of Long Covid	D4.1_Nervous	D4.2_Skin	D4.3_Respiratory	D4.4_cardiovascular	D4.5_Mental
	Male=1 Female=2					A=1 B=2 AB=3 O=4 N/A=5		Yes=1 No=0		Yes=1 No=0	Yes=1 No=0	Yes=1 No=0	Yes=1 No=0	Yes=1 No=0	Yes=1 No=0	Yes=1 No=0	Yes=1 No=0	Yes=1 No=0	Specify other diseases	July- November 2022=1 December 2022-August 2023=2		Yes=1 No=0		Yes=1 No=2 990=Male		Mild=1 Moderate=2 Severe=3		1= 0 2= 1-2 3= >/=3		Yes=1 No=0	Yes=1 No=0	Yes=1 No=0	Yes=1 No=0	Yes=1 No=0	Specify other drugs	1= 0 2= 1-2 3= >/=3							0=unvaccinated 1= Inactivated 2= viral vector 3= mRNA	Yes=1 No=2	Yes=1 No=0	Yes=1 No=0	Yes=1 No=0	Yes=1 No=0	Yes=1 No=0
Participation ID	Code_Gender	Gender	Age (Y)	Code_Age range	Weight (Kg)	Height (cm)	Height (m)	BMI	Code_BMI	Code_Blood group	Blood group	Code_Comorbidity	Comorbidity disease (can select more than 1 option)	A6.1_Hypertension	A6.2_DM	A6.3_Heart Dz.	A6.4_Stroke	A6.5_Tyroid	A6.6_ Ashma	A6.7_Cancer	A6.8_Dyslipidemia	A6.9_others	A6.9_Specify	No. of comorbidity	Code_No. of comorbidity-1	Code_No. of comorbidity-2	Code_Time of COVID-19 disease	Time of COVID-19 disease	Code_ First COVID-19 infection	First COVID-19 infection	Code_ Infection during pregnant	Infection during pregnant	Code_Disease severity	Disease severity	Code_treatment by drugs	Treatment by drugs	C1.1_Andrographis	C1.2_ Favipiravir	C1.3_ Molnupiravir	C1.4_ Symptomatic drugs	C1.5_Others	C1.5_Specify	Code_No. of vaccination	No. of vaccination	1st dose vccinationa	2nd dose vccinationa	3rd dose vccinationa	4th dose vccinationa	5th dose vccinationa
	Male=1 Female=2			18-29=1 30-39=2 40-49=3 50-59=4 more than 60=5					Underweight (< 18.5)=1 Normal (18.5-22.9)=2 Overweight (23-24.9)=3 Obese (≥ 25)=4	A=1 B=2 AB=3 O=4 N/A=5		Yes=1 No=0		Yes=1 No=0	Yes=1 No=0	Yes=1 No=0	Yes=1 No=0	Yes=1 No=0	Yes=1 No=0	Yes=1 No=0	Yes=1 No=0	Yes=1 No=0	Specify other diseases		0= 0 1= 1 2= >/=2	0= 0 1= 1-2 2= >/= 3	July- November 2022=1 December 2022-August 2023=2		Yes=1 No=0		Yes=1 No=2 990=Male		Mild=1 Moderate=2 Severe=3		Yes=1 No=0		Yes=1 No=0	Yes=1 No=0	Yes=1 No=0	Yes=1 No=0	Yes=1 No=0	Specify other drugs	1= 0 2= 1-2 3= >/=3
[truncated: 12 more columns]
