# Supplementary material for: Biological factors associated with long COVID and comparative analysis of SARS-CoV-2 spike protein variants: a retrospective study in Thailand
Source: PeerJ. 2024 Aug 19;12:e17898. doi: 10.7717/peerj.17898 (PMC11340629; doi:10.7717/peerj.17898)
Supplement: Supplemental Information 2 [file peerj-12-17898-s002.xlsx]

## Sheet: omicron
No.	Accession ID	location	Gender	Patient status	69	24	95	67	373	493	969	655	856	213	142	27	954	501	25	19	440	679	764	212	505	346	547	796	371F	478	143	417	486	496	376	408	371L	339	681	144	214	375	498	446	477	405	211	484	26
1	EPI_ISL_10189523	Bangkok	Male	Released	H69del		T95I	A67V	S373P	Q493R	N969K	H655Y	N856K		G142D		Q954H	N501Y			N440K	N679K	N764K	L212I	Y505H		T547K	D796Y		T478K	V143del	K417N		G496S			S371L	G339D	P681H	Y144del	ins214EPE	S375F	Q498R	G446S	S477N		N211del	E484A
2	EPI_ISL_10189524	Bangkok	Male	Released	H69del		T95I	A67V	S373P	Q493R	N969K	H655Y	N856K		G142D		Q954H	N501Y			N440K	N679K	N764K	L212I	Y505H		T547K	D796Y		T478K	V143del	K417N		G496S			S371L	G339D	P681H	Y144del	ins214EPE	S375F	Q498R	G446S	S477N		N211del	E484A
3	EPI_ISL_10189525	Bangkok	Female	Released	H69del		T95I	A67V	S373P	Q493R	N969K	H655Y	N856K		G142D		Q954H	N501Y			N440K	N679K	N764K	L212I	Y505H		T547K	D796Y		T478K	V143del	K417N		G496S			S371L	G339D	P681H	Y144del	ins214EPE	S375F	Q498R	G446S	S477N		N211del	E484A
4	EPI_ISL_10189526	Bangkok	Female	Released	H69del		T95I	A67V	S373P	Q493R	N969K	H655Y	N856K		G142D		Q954H	N501Y			N440K	N679K	N764K	L212I	Y505H	R346K	T547K	D796Y		T478K	V143del	K417N		G496S			S371L	G339D	P681H	Y144del	ins214EPE	S375F	Q498R	G446S	S477N		N211del	E484A
5	EPI_ISL_10189527	Bangkok	Female	Released	H69del		T95I	A67V	S373P	Q493R	N969K	H655Y	N856K		G142D		Q954H	N501Y			N440K	N679K	N764K	L212I	Y505H	R346K	T547K	D796Y		T478K	V143del	K417N		G496S			S371L	G339D	P681H	Y144del	ins214EPE	S375F	Q498R	G446S	S477N		N211del	E484A
6	EPI_ISL_10189528	Bangkok	Male	Released	H69del		T95I	A67V	S373P	Q493R	N969K	H655Y	N856K		G142D		Q954H	N501Y			N440K	N679K	N764K	L212I	Y505H	R346K	T547K	D796Y		T478K	V143del	K417N		G496S			S371L	G339D	P681H	Y144del	ins214EPE	S375F	Q498R	G446S	S477N		N211del	E484A
7	EPI_ISL_10189532	Bangkok	Male	Released	H69del		T95I	A67V	S373P	Q493R	N969K	H655Y	N856K		G142D		Q954H	N501Y			N440K	N679K	N764K	L212I	Y505H		T547K	D796Y		T478K	V143del	K417N		G496S			S371L	G339D	P681H	Y144del	ins214EPE	S375F	Q498R	G446S	S477N		N211del	E484A
8	EPI_ISL_10189533	Bangkok	Male	Released	H69del		T95I	A67V	S373P	Q493R	N969K	H655Y	N856K		G142D		Q954H	N501Y			N440K	N679K	N764K	L212I	Y505H	R346K	T547K	D796Y		T478K	V143del	K417N		G496S			S371L	G339D	P681H	Y144del	ins214EPE	S375F	Q498R	G446S	S477N		N211del	E484A
9	EPI_ISL_10189534	Bangkok	Male	Released	H69del		T95I	A67V	S373P	Q493R	N969K	H655Y	N856K		G142D		Q954H	N501Y			N440K	N679K	N764K	L212I	Y505H	R346K	T547K	D796Y		T478K	V143del	K417N		G496S			S371L	G339D	P681H	Y144del	ins214EPE	S375F	Q498R	G446S	S477N		N211del	E484A
10	EPI_ISL_10189536	Bangkok	Female	Released	H69del		T95I	A67V	S373P	Q493R	N969K	H655Y	N856K		G142D		Q954H	N501Y			N440K	N679K	N764K	L212I	Y505H	R346K	T547K	D796Y		T478K	V143del	K417N		G496S			S371L	G339D	P681H	Y144del	ins214EPE	S375F	Q498R	G446S	S477N		N211del	E484A
11	EPI_ISL_10189537	Bangkok	Male	Released	H69del		T95I	A67V	S373P	Q493R	N969K	H655Y	N856K		G142D		Q954H	N501Y			N440K	N679K	N764K	L212I	Y505H	R346K	T547K	D796Y		T478K	V143del	K417N		G496S			S371L	G339D	P681H	Y144del	ins214EPE	S375F	Q498R	G446S	S477N		N211del	E484A
12	EPI_ISL_10189538	Bangkok	Female	Released	H69del		T95I	A67V	S373P	Q493R	N969K	H655Y	N856K		G142D		Q954H	N501Y			N440K	N679K	N764K	L212I	Y505H	R346K	T547K	D796Y		T478K	V143del	K417N		G496S			S371L	G339D	P681H	Y144del	ins214EPE	S375F	Q498R	G446S	S477N		N211del	E484A
13	EPI_ISL_10189544	Bangkok	Male	Released	H69del		T95I	A67V	S373P	Q493R	N969K	H655Y	N856K		G142D		Q954H	N501Y			N440K	N679K	N764K	L212I	Y505H	R346K	T547K	D796Y		T478K	V143del	K417N		G496S			S371L	G339D	P681H	Y144del	ins214EPE	S375F	Q498R	G446S	S477N		N211del	E484A
14	EPI_ISL_10238965	Bangkok	Male	Released	H69del		T95I	A67V	S373P	Q493R	N969K	H655Y	N856K		G142D		Q954H	N501Y			N440K	N679K	N764K	L212I	Y505H	R346K	T547K	D796Y		T478K	V143del	K417N		G496S			S371L	G339D	P681H	Y144del	ins214EPE	S375F	Q498R	G446S	S477N		N211del	E484A
15	EPI_ISL_10239054	Bangkok	Female	Released	H69del		T95I	A67V	S373P	Q493R	N969K	H655Y	N856K		G142D		Q954H	N501Y			N440K	N679K	N764K	L212I	Y505H	R346K	T547K	D796Y		T478K	V143del	K417N		G496S			S371L	G339D	P681H	Y144del	ins214EPE	S375F	Q498R	G446S	S477N		N211del	E484A
16	EPI_ISL_10239055	Bangkok	Male	Released	H69del		T95I	A67V	S373P	Q493R	N969K	H655Y	N856K		G142D		Q954H	N501Y			N440K	N679K	N764K	L212I	Y505H		T547K	D796Y		T478K	V143del	K417N		G496S			S371L	G339D	P681H	Y144del	ins214EPE	S375F	Q498R	G446S	S477N		N211del	E484A
17	EPI_ISL_10239056	Bangkok	Male	Released	H69del		T95I	A67V	S373P	Q493R	N969K	H655Y	N856K		G142D		Q954H	N501Y			N440K	N679K	N764K	L212I	Y505H	R346K	T547K	D796Y		T478K	V143del	K417N		G496S			S371L	G339D	P681H	Y144del	ins214EPE	S375F	Q498R	G446S	S477N		N211del	E484A
18	EPI_ISL_10239057	Bangkok	Female	Released	H69del		T95I	A67V	S373P	Q493R	N969K	H655Y	N856K		G142D		Q954H	N501Y			N440K	N679K	N764K	L212I	Y505H		T547K	D796Y		T478K	V143del	K417N		G496S			S371L	G339D	P681H	Y144del	ins214EPE	S375F	Q498R	G446S	S477N		N211del	E484A
19	EPI_ISL_10239119	Bangkok	Male	Released	H69del		T95I	A67V	S373P	Q493R	N969K	H655Y	N856K		G142D		Q954H	N501Y			N440K	N679K	N764K	L212I	Y505H		T547K	D796Y		T478K	V143del	K417N		G496S			S371L	G339D	P681H	Y144del	ins214EPE	S375F	Q498R	G446S	S477N		N211del	E484A
20	EPI_ISL_10239120	Bangkok	Female	Released	H69del		T95I	A67V	S373P	Q493R	N969K	H655Y	N856K		G142D		Q954H	N501Y			N440K	N679K	N764K	L212I	Y505H	R346K	T547K	D796Y		T478K	V143del	K417N		G496S			S371L	G339D	P681H	Y144del	ins214EPE	S375F	Q498R	G446S	S477N		N211del	E484A
21	EPI_ISL_10239121	Bangkok	Male	Released	H69del		T95I	A67V	S373P	Q493R	N969K	H655Y	N856K		G142D		Q954H	N501Y			N440K	N679K	N764K	L212I	Y505H	R346K	T547K	D796Y		T478K	V143del	K417N		G496S			S371L	G339D	P681H	Y144del	ins214EPE	S375F	Q498R	G446S	S477N		N211del	E484A
22	EPI_ISL_10239155	Bangkok	Female	Released	H69del		T95I	A67V	S373P	Q493R	N969K	H655Y	N856K		G142D		Q954H	N501Y			N440K	N679K	N764K	L212I	Y505H	R346K	T547K	D796Y		T478K	V143del	K417N		G496S			S371L	G339D	P681H	Y144del	ins214EPE	S375F	Q498R	G446S	S477N		N211del	E484A
23	EPI_ISL_10239190	Bangkok	Male	Released	H69del		T95I	A67V	S373P	Q493R	N969K	H655Y	N856K		G142D		Q954H	N501Y			N440K	N679K	N764K	L212I	Y505H	R346K	T547K	D796Y		T478K	V143del	K417N		G496S			S371L	G339D	P681H	Y144del	ins214EPE	S375F	Q498R	G446S	S477N		N211del	E484A
24	EPI_ISL_10239191	Bangkok	Female	Released	H69del		T95I	A67V	S373P	Q493R	N969K	H655Y	N856K		G142D		Q954H	N501Y			N440K	N679K	N764K	L212I	Y505H	R346K	T547K	D796Y		T478K	V143del	K417N		G496S			S371L	G339D	P681H	Y144del	ins214EPE	S375F	Q498R	G446S	S477N		N211del	E484A
25	EPI_ISL_10239276	Bangkok	Male	Released	H69del		T95I	A67V	S373P	Q493R	N969K	H655Y	N856K		G142D		Q954H	N501Y			N440K	N679K	N764K	L212I	Y505H	R346K	T547K	D796Y		T478K	V143del	K417N		G496S			S371L	G339D	P681H	Y144del	ins214EPE	S375F	Q498R	G446S	S477N		N211del	E484A
26	EPI_ISL_10239321	Bangkok	Male	Released	H69del		T95I	A67V	S373P	Q493R	N969K	H655Y	N856K		G142D		Q954H	N501Y			N440K	N679K	N764K	L212I	Y505H	R346K	T547K	D796Y		T478K	V143del	K417N		G496S			S371L	G339D	P681H	Y144del	ins214EPE	S375F	Q498R	G446S	S477N		N211del	E484A
27	EPI_ISL_10239378	Bangkok	Male	Released	H69del		T95I	A67V	S373P	Q493R	N969K	H655Y	N856K		G142D		Q954H	N501Y			N440K	N679K	N764K	L212I	Y505H	R346K	T547K	D796Y		T478K	V143del	K417N		G496S			S371L	G339D	P681H	Y144del	ins214EPE	S375F	Q498R	G446S	S477N		N211del	E484A
28	EPI_ISL_10239438	Bangkok	Female	Released	H69del		T95I	A67V	S373P	Q493R	N969K	H655Y	N856K		G142D		Q954H	N501Y			N440K	N679K	N764K	L212I	Y505H	R346K	T547K	D796Y		T478K	V143del	K417N		G496S			S371L	G339D	P681H	Y144del	ins214EPE	S375F	Q498R	G446S	S477N		N211del	E484A
29	EPI_ISL_10239439	Bangkok	Male	Released	H69del		T95I	A67V	S373P	Q493R	N969K	H655Y	N856K		G142D		Q954H	N501Y			N440K	N679K	N764K	L212I	Y505H	R346K	T547K	D796Y		T478K	V143del	K417N		G496S			S371L	G339D	P681H	Y144del	ins214EPE	S375F	Q498R	G446S	S477N		N211del	E484A
30	EPI_ISL_10239440	Bangkok	Female	Released	H69del		T95I	A67V	S373P	Q493R	N969K	H655Y	N856K		G142D		Q954H	N501Y			N440K	N679K	N764K	L212I	Y505H	R346K	T547K	D796Y		T478K	V143del	K417N		G496S			S371L	G339D	P681H	Y144del	ins214EPE	S375F	Q498R	G446S	S477N		N211del	E484A
31	EPI_ISL_10239505	Bangkok	Female	Released	H69del		T95I	A67V	S373P	Q493R	N969K	H655Y	N856K		G142D		Q954H	N501Y			N440K	N679K	N764K	L212I	Y505H	R346K	T547K	D796Y		T478K	V143del	K417N		G496S			S371L	G339D	P681H	Y144del	ins214EPE	S375F	Q498R	G446S	S477N		N211del	E484A
32	EPI_ISL_10239506	Bangkok	Female	Released	H69del		T95I	A67V	S373P	Q493R	N969K	H655Y	N856K		G142D		Q954H	N501Y			N440K	N679K	N764K	L212I	Y505H	R346K	T547K	D796Y		T478K	V143del	K417N		G496S			S371L	G339D	P681H	Y144del	ins214EPE	S375F	Q498R	G446S	S477N		N211del	E484A
33	EPI_ISL_10239655	Bangkok	Female	Released	H69del		T95I	A67V	S373P	Q493R	N969K	H655Y	N856K		G142D		Q954H	N501Y			N440K	N679K	N764K	L212I	Y505H	R346K	T547K	D796Y		T478K	V143del	K417N		G496S			S371L	G339D	P681H	Y144del	ins214EPE	S375F	Q498R	G446S	S477N		N211del	E484A
34	EPI_ISL_10239656	Bangkok	Female	Released	H69del		T95I	A67V	S373P	Q493R	N969K	H655Y	N856K		G142D		Q954H	N501Y			N440K	N679K	N764K	L212I	Y505H	R346K	T547K	D796Y		T478K	V143del	K417N		G496S			S371L	G339D	P681H	Y144del	ins214EPE	S375F	Q498R	G446S	S477N		N211del	E484A
35	EPI_ISL_10239724	Bangkok	Male	Released	H69del		T95I	A67V	S373P	Q493R	N969K	H655Y	N856K		G142D		Q954H	N501Y			N440K	N679K	N764K	L212I	Y505H	R346K	T547K	D796Y		T478K	V143del	K417N		G496S			S371L	G339D	P681H	Y144del	ins214EPE	S375F	Q498R	G446S	S477N		N211del	E484A
36	EPI_ISL_10282024	Bangkok	Male	Released	H69del		T95I	A67V	S373P	Q493R	N969K	H655Y	N856K		G142D		Q954H	N501Y			N440K	N679K	N764K	L212I	Y505H		T547K	D796Y		T478K	V143del	K417N		G496S			S371L	G339D	P681H	Y144del	ins214EPE	S375F	Q498R	G446S	S477N		N211del	E484A
37	EPI_ISL_10282086	Bangkok	Male	Released	H69del		T95I	A67V	S373P	Q493R	N969K	H655Y	N856K		G142D		Q954H	N501Y			N440K	N679K	N764K	L212I	Y505H		T547K	D796Y		T478K	V143del	K417N		G496S			S371L	G339D	P681H	Y144del	ins214EPE	S375F	Q498R	G446S	S477N		N211del	E484A
38	EPI_ISL_10282087	Bangkok	Female	Released	H69del		T95I	A67V	S373P	Q493R	N969K	H655Y	N856K		G142D		Q954H	N501Y			N440K	N679K	N764K	L212I	Y505H	R346K	T547K	D796Y		T478K	V143del	K417N		G496S			S371L	G339D	P681H	Y144del	ins214EPE	S375F	Q498R	G446S	S477N		N211del	E484A
39	EPI_ISL_10282088	Bangkok	Female	Released	H69del		T95I	A67V	S373P	Q493R	N969K	H655Y	N856K		G142D		Q954H	N501Y			N440K	N679K	N764K	L212I	Y505H	R346K	T547K	D796Y		T478K	V143del	K417N		G496S			S371L	G339D	P681H	Y144del	ins214EPE	S375F	Q498R	G446S	S477N		N211del	E484A
40	EPI_ISL_10282089	Bangkok	Female	Released	H69del		T95I	A67V	S373P	Q493R	N969K	H655Y	N856K		G142D		Q954H	N501Y			N440K	N679K	N764K	L212I	Y505H		T547K	D796Y		T478K	V143del	K417N		G496S			S371L	G339D	P681H	Y144del	ins214EPE	S375F	Q498R	G446S	S477N		N211del	E484A
41	EPI_ISL_10282090	Bangkok	Male	Released	H69del		T95I	A67V	S373P	Q493R	N969K	H655Y	N856K		G142D		Q954H	N501Y			N440K	N679K	N764K	L212I	Y505H	R346K	T547K	D796Y		T478K	V143del	K417N		G496S			S371L	G339D	P681H	Y144del	ins214EPE	S375F	Q498R	G446S	S477N		N211del	E484A
42	EPI_ISL_10282171	Bangkok	Female	Released	H69del		T95I	A67V	S373P	Q493R	N969K	H655Y	N856K		G142D		Q954H	N501Y			N440K	N679K	N764K	L212I	Y505H	R346K	T547K	D796Y		T478K	V143del	K417N		G496S			S371L	G339D	P681H	Y144del	ins214EPE	S375F	Q498R	G446S	S477N		N211del	E484A
43	EPI_ISL_10282172	Bangkok	Male	Released	H69del		T95I	A67V	S373P	Q493R	N969K	H655Y	N856K		G142D		Q954H	N501Y			N440K	N679K	N764K	L212I	Y505H	R346K	T547K	D796Y		T478K	V143del	K417N		G496S			S371L	G339D	P681H	Y144del	ins214EPE	S375F	Q498R	G446S	S477N		N211del	E484A
44	EPI_ISL_10282665	Bangkok	Male	Released	H69del		T95I	A67V	S373P	Q493R	N969K	H655Y	N856K		G142D		Q954H	N501Y			N440K	N679K	N764K	L212I	Y505H		T547K	D796Y		T478K	V143del	K417N		G496S			S371L	G339D	P681H	Y144del	ins214EPE	S375F	Q498R	G446S	S477N		N211del	E484A
45	EPI_ISL_10282666	Bangkok	Male	Released	H69del		T95I	A67V	S373P	Q493R	N969K	H655Y	N856K		G142D		Q954H	N501Y			N440K	N679K	N764K	L212I	Y505H	R346K	T547K	D796Y		T478K	V143del	K417N		G496S			S371L	G339D	P681H	Y144del	ins214EPE	S375F	Q498R	G446S	S477N		N211del	E484A
46	EPI_ISL_10282744	Bangkok	Male	Released	H69del		T95I	A67V	S373P	Q493R	N969K	H655Y	N856K		G142D		Q954H	N501Y			N440K	N679K	N764K	L212I	Y505H	R346K	T547K	D796Y		T478K	V143del	K417N		G496S			S371L	G339D	P681H	Y144del	ins214EPE	S375F	Q498R	G446S	S477N		N211del	E484A
47	EPI_ISL_10282745	Bangkok	Male	Released	H69del		T95I	A67V	S373P	Q493R	N969K	H655Y	N856K		G142D		Q954H	N501Y			N440K	N679K	N764K	L212I	Y505H	R346K	T547K	D796Y		T478K	V143del	K417N		G496S			S371L	G339D	P681H	Y144del	ins214EPE	S375F	Q498R	G446S	S477N		N211del	E484A
48	EPI_ISL_10411648	Trat	Male	Hospitalized		L24del			S373P	Q493R	N969K	H655Y		V213G	G142D	A27S	Q954H	N501Y	P25del	T19I	N440K	N679K	N764K		Y505H			D796Y	S371F	T478K		K417N			T376A	R408S		G339D	P681H			S375F	Q498R		S477N	D405N		E484A	P26del
49	EPI_ISL_10411664	Trat	Female	Hospitalized	H69del		T95I	A67V	S373P	Q493R	N969K	H655Y	N856K		G142D		Q954H	N501Y				N679K		L212I	Y505H	R346K	T547K	D796Y		T478K	V143del			G496S			S371L	G339D	P681H	Y144del	ins214EPE	S375F	Q498R		S477N		N211del	E484A
50	EPI_ISL_10411672	Trat	Female	Hospitalized		L24del			S373P	Q493R	N969K	H655Y		V213G	G142D	A27S	Q954H	N501Y	P25del	T19I	N440K	N679K	N764K		Y505H			D796Y	S371F	T478K		K417N			T376A	R408S		G339D	P681H			S375F	Q498R		S477N	D405N		E484A	P26del
51	EPI_ISL_10411694	Trat	Female	Hospitalized		L24del			S373P	Q493R	N969K	H655Y		V213G	G142D	A27S	Q954H	N501Y	P25del	T19I		N679K			Y505H			D796Y	S371F	T478K					T376A			G339D	P681H			S375F	Q498R		S477N	D405N		E484A	P26del
52	EPI_ISL_10411695	Trat	Male	Hospitalized	H69del		T95I	A67V	S373P	Q493R	N969K	H655Y	N856K		G142D		Q954H	N501Y				N679K	N764K	L212I	Y505H	R346K	T547K	D796Y		T478K	V143del			G496S			S371L	G339D	P681H	Y144del	ins214EPE	S375F	Q498R		S477N		N211del	E484A
53	EPI_ISL_10411725	Trat	Female	Hospitalized	H69del		T95I	A67V	S373P	Q493R	N969K	H655Y	N856K		G142D		Q954H	N501Y				N679K	N764K	L212I	Y505H		T547K	D796Y		T478K	V143del			G496S			S371L	G339D	P681H	Y144del	ins214EPE	S375F	Q498R		S477N		N211del	E484A
54	EPI_ISL_10411732	Trat	Female	Hospitalized		L24del			S373P	Q493R	N969K	H655Y		V213G	G142D	A27S	Q954H	N501Y	P25del	T19I	N440K	N679K	N764K		Y505H			D796Y	S371F	T478K		K417N			T376A	R408S		G339D	P681H			S375F	Q498R		S477N	D405N		E484A	P26del
55	EPI_ISL_10411778	Trat	Male	Hospitalized		L24del			S373P	Q493R	N969K	H655Y		V213G	G142D	A27S	Q954H	N501Y	P25del	T19I	N440K	N679K	N764K		Y505H			D796Y	S371F	T478K		K417N			T376A	R408S		G339D	P681H			S375F	Q498R		S477N	D405N		E484A	P26del
56	EPI_ISL_10968663	Lampang	Female	Hospitalized	H69del		T95I	A67V	S373P	Q493R	N969K	H655Y	N856K		G142D		Q954H	N501Y			N440K	N679K	N764K	L212I	Y505H	R346K	T547K	D796Y		T478K	V143del			G496S			S371L	G339D	P681H	Y144del	ins214EPE	S375F	Q498R	G446S	S477N		N211del	E484A
57	EPI_ISL_10968679	Lampang	Male	Hospitalized	H69del		T95I	A67V	S373P	Q493R	N969K	H655Y	N856K		G142D		Q954H	N501Y			N440K	N679K	N764K	L212I	Y505H	R346K	T547K	D796Y		T478K	V143del	K417N		G496S			S371L	G339D	P681H	Y144del	ins214EPE	S375F	Q498R	G446S	S477N		N211del	E484A
58	EPI_ISL_10968685	Chiang Mai	Male	Hospitalized	H69del		T95I	A67V	S373P	Q493R	N969K	H655Y	N856K		G142D		Q954H	N501Y				N679K	N764K	L212I	Y505H	R346K	T547K	D796Y		T478K	V143del			G496S			S371L	G339D	P681H	Y144del	ins214EPE	S375F	Q498R		S477N		N211del	E484A
59	EPI_ISL_10968695	Lampang	Male	Hospitalized	H69del		T95I	A67V	S373P	Q493R	N969K	H655Y	N856K		G142D		Q954H	N501Y			N440K	N679K	N764K	L212I	Y505H	R346K	T547K	D796Y		T478K	V143del	K417N		G496S			S371L	G339D	P681H	Y144del	ins214EPE	S375F	Q498R	G446S	S477N		N211del	E484A
60	EPI_ISL_10968709	Lampang	Male	Hospitalized	H69del		T95I	A67V	S373P	Q493R	N969K	H655Y	N856K		G142D		Q954H	N501Y				N679K	N764K	L212I	Y505H	R346K	T547K	D796Y		T478K	V143del			G496S			S371L	G339D	P681H	Y144del	ins214EPE	S375F	Q498R		S477N		N211del	E484A
61	EPI_ISL_10968715	Lampang	Female	Hospitalized	H69del		T95I	A67V	S373P	Q493R	N969K	H655Y	N856K		G142D		Q954H	N501Y			N440K	N679K	N764K	L212I	Y505H	R346K	T547K	D796Y		T478K	V143del	K417N		G496S			S371L	G339D	P681H	Y144del	ins214EPE	S375F	Q498R	G446S	S477N		N211del	E484A
62	EPI_ISL_10968716	Chiang Mai	Female	Hospitalized	H69del		T95I	A67V	S373P	Q493R	N969K	H655Y	N856K		G142D		Q954H	N501Y			N440K	N679K	N764K	L212I	Y505H	R346K	T547K	D796Y		T478K	V143del	K417N		G496S			S371L	G339D	P681H	Y144del	ins214EPE	S375F	Q498R	G446S	S477N		N211del	E484A
63	EPI_ISL_10968723	Lampang	Female	Hospitalized	H69del		T95I	A67V	S373P	Q493R	N969K	H655Y	N856K		G142D		Q954H	N501Y			N440K	N679K	N764K	L212I	Y505H	R346K	T547K	D796Y		T478K	V143del	K417N		G496S			S371L	G339D	P681H	Y144del	ins214EPE	S375F	Q498R	G446S	S477N		N211del	E484A
64	EPI_ISL_10968731	Lampang	Female	Hospitalized	H69del		T95I	A67V	S373P	Q493R	N969K	H655Y	N856K		G142D		Q954H	N501Y			N440K	N679K	N764K	L212I	Y505H	R346K	T547K	D796Y		T478K	V143del	K417N		G496S			S371L	G339D	P681H	Y144del	ins214EPE	S375F	Q498R	G446S	S477N		N211del	E484A
65	EPI_ISL_10968734	Lampang	Female	Hospitalized	H69del		T95I	A67V	S373P	Q493R	N969K	H655Y	N856K		G142D		Q954H	N501Y			N440K	N679K	N764K	L212I	Y505H	R346K	T547K	D796Y		T478K	V143del	K417N		G496S			S371L	G339D	P681H	Y144del	ins214EPE	S375F	Q498R	G446S	S477N		N211del	E484A
66	EPI_ISL_10968740	Chiang Mai	Female	Hospitalized		L24del			S373P	Q493R	N969K	H655Y		V213G	G142D	A27S	Q954H	N501Y	P25del	T19I	N440K	N679K	N764K		Y505H			D796Y	S371F	T478K		K417N			T376A	R408S		G339D	P681H			S375F	Q498R		S477N	D405N		E484A	P26del
67	EPI_ISL_10968746	Chiang Mai	Male	Hospitalized	H69del		T95I	A67V	S373P	Q493R	N969K	H655Y	N856K		G142D		Q954H	N501Y				N679K	N764K	L212I	Y505H		T547K	D796Y		T478K	V143del			G496S			S371L	G339D	P681H	Y144del	ins214EPE	S375F	Q498R		S477N		N211del	E484A
68	EPI_ISL_10968750	Lampang	Female	Hospitalized	H69del		T95I	A67V	S373P	Q493R	N969K	H655Y	N856K		G142D		Q954H	N501Y			N440K	N679K	N764K	L212I	Y505H	R346K	T547K	D796Y		T478K	V143del	K417N		G496S			S371L	G339D	P681H	Y144del	ins214EPE	S375F	Q498R	G446S	S477N		N211del	E484A
69	EPI_ISL_10968774	Chiang Mai	Female	Deceased	H69del		T95I	A67V	S373P	Q493R	N969K	H655Y	N856K		G142D		Q954H	N501Y				N679K	N764K	L212I	Y505H	R346K	T547K	D796Y		T478K	V143del			G496S			S371L	G339D	P681H	Y144del	ins214EPE	S375F	Q498R		S477N		N211del	E484A
70	EPI_ISL_10968781	Lampang	Female	Hospitalized	H69del		T95I	A67V	S373P	Q493R	N969K	H655Y	N856K		G142D		Q954H	N501Y				N679K	N764K	L212I	Y505H	R346K	T547K	D796Y		T478K	V143del			G496S			S371L	G339D	P681H	Y144del	ins214EPE	S375F	Q498R		S477N		N211del	E484A
71	EPI_ISL_10968790	Chiang Mai	Male	Hospitalized	H69del		T95I	A67V	S373P	Q493R	N969K	H655Y	N856K		G142D		Q954H	N501Y				N679K	N764K	L212I	Y505H		T547K	D796Y		T478K	V143del			G496S			S371L	G339D	P681H	Y144del	ins214EPE	S375F	Q498R		S477N		N211del	E484A
72	EPI_ISL_10968797	Chiang Mai	Male	Hospitalized	H69del		T95I	A67V	S373P	Q493R	N969K	H655Y	N856K		G142D		Q954H	N501Y			N440K	N679K	N764K	L212I	Y505H	R346K	T547K	D796Y		T478K	V143del	K417N		G496S			S371L	G339D	P681H	Y144del	ins214EPE	S375F	Q498R	G446S	S477N		N211del	E484A
73	EPI_ISL_10968805	Lampang	Female	Hospitalized	H69del		T95I	A67V	S373P	Q493R	N969K	H655Y	N856K		G142D		Q954H	N501Y				N679K	N764K	L212I	Y505H	R346K	T547K	D796Y		T478K	V143del			G496S			S371L	G339D	P681H	Y144del	ins214EPE	S375F	Q498R		S477N		N211del	E484A
74	EPI_ISL_10968813	Lampang	Female	Hospitalized	H69del		T95I	A67V	S373P	Q493R	N969K	H655Y	N856K		G142D		Q954H	N501Y				N679K	N764K	L212I	Y505H	R346K	T547K	D796Y		T478K	V143del			G496S			S371L	G339D	P681H	Y144del	ins214EPE	S375F	Q498R		S477N		N211del	E484A
75	EPI_ISL_10968814	Chiang Mai	Female	Hospitalized	H69del		T95I	A67V	S373P	Q493R	N969K	H655Y	N856K		G142D		Q954H	N501Y				N679K	N764K	L212I	Y505H		T547K	D796Y		T478K	V143del			G496S			S371L	G339D	P681H	Y144del	ins214EPE	S375F	Q498R		S477N		N211del	E484A
76	EPI_ISL_10968829	Chiang Mai	Female	Hospitalized	H69del		T95I	A67V	S373P	Q493R	N969K	H655Y	N856K		G142D		Q954H	N501Y				N679K	N764K	L212I	Y505H		T547K	D796Y		T478K	V143del			G496S			S371L	G339D	P681H	Y144del	ins214EPE	S375F	Q498R		S477N		N211del	E484A
77	EPI_ISL_10968835	Lampang	Female	Hospitalized		L24del			S373P	Q493R	N969K	H655Y		V213G	G142D	A27S	Q954H	N501Y	P25del	T19I	N440K	N679K	N764K		Y505H			D796Y	S371F	T478K		K417N			T376A	R408S		G339D	P681H			S375F	Q498R		S477N	D405N		E484A	P26del
78	EPI_ISL_11179246	Prachinburi	Female	Hospitalized	H69del		T95I	A67V	S373P	Q493R	N969K	H655Y	N856K		G142D		Q954H	N501Y				N679K	N764K	L212I	Y505H	R346K	T547K	D796Y		T478K	V143del			G496S			S371L	G339D	P681H	Y144del	ins214EPE	S375F	Q498R		S477N		N211del	E484A
79	EPI_ISL_11179251	Prachinburi	Female	Hospitalized	H69del		T95I	A67V	S373P	Q493R	N969K	H655Y	N856K		G142D		Q954H	N501Y				N679K		L212I	Y505H	R346K	T547K	D796Y		T478K	V143del			G496S			S371L	G339D	P681H	Y144del	ins214EPE	S375F	Q498R		S477N		N211del	E484A
80	EPI_ISL_11179264	Prachinburi	Male	Hospitalized		L24del			S373P	Q493R	N969K	H655Y		V213G	G142D	A27S	Q954H	N501Y	P25del	T19I		N679K			Y505H			D796Y	S371F	T478K					T376A			G339D	P681H			S375F	Q498R		S477N			E484A	P26del
81	EPI_ISL_11179272	Prachinburi	Male	Hospitalized	H69del		T95I	A67V	S373P	Q493R	N969K	H655Y	N856K		G142D		Q954H	N501Y				N679K	N764K	L212I	Y505H	R346K	T547K	D796Y		T478K	V143del			G496S			S371L	G339D	P681H	Y144del	ins214EPE	S375F	Q498R		S477N		N211del	E484A
82	EPI_ISL_11179276	Prachinburi	Female	Hospitalized		L24del			S373P	Q493R	N969K	H655Y		V213G	G142D	A27S	Q954H	N501Y	P25del	T19I		N679K			Y505H			D796Y	S371F	T478K					T376A			G339D	P681H			S375F	Q498R		S477N	D405N		E484A	P26del
83	EPI_ISL_11179282	Prachinburi	Female	Hospitalized		L24del			S373P	Q493R	N969K	H655Y		V213G	G142D	A27S	Q954H	N501Y	P25del	T19I	N440K	N679K	N764K		Y505H			D796Y	S371F	T478K		K417N			T376A	R408S		G339D	P681H			S375F	Q498R		S477N	D405N		E484A	P26del
84	EPI_ISL_11179283	Prachinburi	Male	Hospitalized		L24del			S373P	Q493R	N969K	H655Y		V213G	G142D	A27S	Q954H	N501Y	P25del	T19I	N440K	N679K	N764K		Y505H			D796Y	S371F	T478K		K417N			T376A	R408S		G339D	P681H			S375F	Q498R		S477N	D405N		E484A	P26del
85	EPI_ISL_11179518	Samut Prakan	Male	Deceased		L24del			S373P	Q493R	N969K	H655Y		V213G	G142D	A27S	Q954H	N501Y	P25del	T19I	N440K	N679K	N764K		Y505H			D796Y	S371F	T478K		K417N			T376A			G339D	P681H			S375F	Q498R		S477N	D405N		E484A	P26del
86	EPI_ISL_11179534	Prachinburi	Male	Hospitalized	H69del		T95I	A67V	S373P	Q493R	N969K	H655Y	N856K		G142D		Q954H	N501Y			N440K	N679K	N764K	L212I	Y505H	R346K	T547K	D796Y		T478K	V143del	K417N		G496S			S371L	G339D	P681H	Y144del	ins214EPE	S375F	Q498R	G446S	S477N		N211del	E484A
87	EPI_ISL_11179562	Trat	Male	Hospitalized		L24del			S373P	Q493R	N969K	H655Y		V213G	G142D	A27S	Q954H	N501Y	P25del	T19I	N440K	N679K	N764K		Y505H			D796Y	S371F	T478K		K417N			T376A	R408S		G339D	P681H			S375F	Q498R		S477N	D405N		E484A	P26del
88	EPI_ISL_11413919	Amnat Charoen	Male	Hospitalized	H69del		T95I	A67V	S373P	Q493R	N969K	H655Y	N856K		G142D		Q954H	N501Y				N679K	N764K	L212I	Y505H	R346K	T547K	D796Y		T478K	V143del			G496S			S371L	G339D	P681H	Y144del	ins214EPE	S375F	Q498R		S477N		N211del	E484A
89	EPI_ISL_11414010	Ubon Ratchathani	Male	Hospitalized	H69del		T95I	A67V	S373P	Q493R	N969K	H655Y	N856K		G142D		Q954H	N501Y				N679K		L212I	Y505H	R346K	T547K	D796Y		T478K	V143del	K417N		G496S			S371L	G339D	P681H	Y144del	ins214EPE	S375F	Q498R		S477N		N211del	E484A
90	EPI_ISL_11414069	Ubon Ratchathani	Female	Hospitalized		L24del			S373P	Q493R	N969K	H655Y		V213G	G142D	A27S	Q954H	N501Y	P25del	T19I	N440K	N679K	N764K		Y505H			D796Y	S371F	T478K		K417N			T376A	R408S		G339D	P681H			S375F	Q498R		S477N	D405N		E484A	P26del
91	EPI_ISL_11441958	Lampang	Female	Death	H69del		T95I	A67V	S373P	Q493R	N969K	H655Y	N856K		G142D		Q954H	N501Y				N679K		L212I	Y505H	R346K	T547K	D796Y		T478K	V143del			G496S			S371L	G339D	P681H	Y144del	ins214EPE	S375F	Q498R		S477N		N211del	E484A
92	EPI_ISL_11442093	Chiang Rai	Female	Death	H69del		T95I	A67V	S373P	Q493R	N969K	H655Y	N856K		G142D		Q954H	N501Y			N440K	N679K	N764K	L212I	Y505H	R346K	T547K	D796Y		T478K	V143del	K417N		G496S			S371L	G339D	P681H	Y144del	ins214EPE	S375F	Q498R	G446S	S477N		N211del	E484A
93	EPI_ISL_11442115	Nonthaburi	Male	Death	H69del		T95I	A67V	S373P	Q493R	N969K	H655Y	N856K		G142D		Q954H	N501Y				N679K	N764K	L212I	Y505H	R346K	T547K	D796Y		T478K	V143del			G496S			S371L	G339D	P681H	Y144del	ins214EPE	S375F	Q498R		S477N		N211del	E484A
94	EPI_ISL_11698090	Bangkok	Male	Released		L24del			S373P	Q493R	N969K	H655Y		V213G	G142D	A27S	Q954H	N501Y	P25del	T19I	N440K	N679K	N764K		Y505H			D796Y	S371F	T478K		K417N			T376A	R408S		G339D	P681H			S375F	Q498R		S477N	D405N		E484A	P26del
95	EPI_ISL_11698091	Bangkok	Male	Released		L24del			S373P	Q493R	N969K	H655Y		V213G	G142D	A27S	Q954H	N501Y	P25del	T19I	N440K	N679K	N764K		Y505H			D796Y	S371F	T478K		K417N			T376A	R408S		G339D	P681H			S375F	Q498R		S477N	D405N		E484A	P26del
96	EPI_ISL_11698092	Bangkok	Female	Released		L24del			S373P	Q493R	N969K	H655Y		V213G	G142D	A27S	Q954H	N501Y	P25del	T19I	N440K	N679K	N764K		Y505H			D796Y	S371F	T478K		K417N			T376A	R408S		G339D	P681H			S375F	Q498R		S477N	D405N		E484A	P26del
97	EPI_ISL_11698093	Bangkok	Male	Released		L24del			S373P	Q493R	N969K	H655Y		V213G	G142D	A27S	Q954H	N501Y	P25del	T19I	N440K	N679K	N764K		Y505H			D796Y	S371F	T478K		K417N			T376A	R408S		G339D	P681H			S375F	Q498R		S477N	D405N		E484A	P26del
98	EPI_ISL_11698094	Bangkok	Female	Released		L24del			S373P	Q493R	N969K	H655Y		V213G	G142D	A27S	Q954H	N501Y	P25del	T19I	N440K	N679K	N764K		Y505H			D796Y	S371F	T478K		K417N			T376A	R408S		G339D	P681H			S375F	Q498R		S477N	D405N		E484A	P26del
99	EPI_ISL_11698095	Bangkok	Female	Released		L24del			S373P	Q493R	N969K	H655Y		V213G	G142D	A27S	Q954H	N501Y	P25del	T19I	N440K	N679K	N764K		Y505H			D796Y	S371F	T478K		K417N			T376A	R408S		G339D	P681H			S375F	Q498R		S477N	D405N		E484A	P26del
100	EPI_ISL_11698096	Bangkok	Female	Released		L24del			S373P	Q493R	N969K	H655Y		V213G	G142D	A27S	Q954H	N501Y	P25del	T19I	N440K	N679K	N764K		Y505H			D796Y	S371F	T478K		K417N			T376A	R408S		G339D	P681H			S375F	Q498R		S477N	D405N		E484A	P26del
101	EPI_ISL_11698097	Bangkok	Male	Released		L24del			S373P	Q493R	N969K	H655Y		V213G	G142D	A27S	Q954H	N501Y	P25del	T19I	N440K	N679K	N764K		Y505H			D796Y	S371F	T478K		K417N			T376A	R408S		G339D	P681H			S375F	Q498R		S477N	D405N		E484A	P26del
102	EPI_ISL_11698098	Bangkok	Male	Released		L24del			S373P	Q493R	N969K	H655Y		V213G	G142D	A27S	Q954H	N501Y	P25del	T19I	N440K	N679K	N764K		Y505H			D796Y	S371F	T478K		K417N			T376A	R408S		G339D	P681H			S375F	Q498R		S477N	D405N		E484A	P26del
103	EPI_ISL_11698099	Bangkok	Male	Released		L24del			S373P	Q493R	N969K	H655Y		V213G	G142D	A27S	Q954H	N501Y	P25del	T19I	N440K	N679K	N764K		Y505H			D796Y	S371F	T478K		K417N			T376A	R408S		G339D	P681H			S375F	Q498R		S477N	D405N		E484A	P26del
104	EPI_ISL_11698100	Bangkok	Male	Released		L24del			S373P	Q493R	N969K	H655Y		V213G	G142D	A27S	Q954H	N501Y	P25del	T19I	N440K	N679K	N764K		Y505H			D796Y	S371F	T478K		K417N			T376A	R408S		G339D	P681H			S375F	Q498R		S477N	D405N		E484A	P26del
105	EPI_ISL_11698101	Bangkok	Male	Released		L24del			S373P	Q493R	N969K	H655Y		V213G	G142D	A27S	Q954H	N501Y	P25del	T19I	N440K	N679K	N764K		Y505H			D796Y	S371F	T478K		K417N			T376A	R408S		G339D	P681H			S375F	Q498R		S477N	D405N		E484A	P26del
106	EPI_ISL_11698102	Bangkok	Male	Released		L24del			S373P	Q493R	N969K	H655Y		V213G	G142D	A27S	Q954H	N501Y	P25del	T19I	N440K	N679K	N764K		Y505H			D796Y	S371F	T478K		K417N			T376A	R408S		G339D	P681H			S375F	Q498R		S477N	D405N		E484A	P26del
107	EPI_ISL_11698103	Bangkok	Male	Released		L24del			S373P	Q493R	N969K	H655Y		V213G	G142D	A27S	Q954H	N501Y	P25del	T19I	N440K	N679K	N764K		Y505H			D796Y	S371F	T478K		K417N			T376A	R408S		G339D	P681H			S375F	Q498R		S477N	D405N		E484A	P26del
108	EPI_ISL_11698104	Bangkok	Female	Released		L24del			S373P	Q493R	N969K	H655Y		V213G	G142D	A27S	Q954H	N501Y	P25del	T19I	N440K	N679K	N764K		Y505H			D796Y	S371F	T478K		K417N			T376A	R408S		G339D	P681H			S375F	Q498R		S477N	D405N		E484A	P26del
109	EPI_ISL_11698105	Bangkok	Male	Released		L24del			S373P	Q493R	N969K	H655Y		V213G	G142D	A27S	Q954H	N501Y	P25del	T19I	N440K	N679K	N764K		Y505H			D796Y	S371F	T478K		K417N			T376A	R408S		G339D	P681H			S375F	Q498R		S477N	D405N		E484A	P26del
110	EPI_ISL_11698106	Bangkok	Male	Released		L24del			S373P	Q493R	N969K	H655Y		V213G	G142D	A27S	Q954H	N501Y	P25del	T19I	N440K	N679K	N764K		Y505H			D796Y	S371F	T478K		K417N			T376A	R408S		G339D	P681H			S375F	Q498R		S477N	D405N		E484A	P26del
111	EPI_ISL_11698107	Bangkok	Female	Released		L24del			S373P	Q493R	N969K	H655Y		V213G	G142D	A27S	Q954H	N501Y	P25del	T19I	N440K	N679K	N764K		Y505H			D796Y	S371F	T478K		K417N			T376A	R408S		G339D	P681H			S375F	Q498R		S477N	D405N		E484A	P26del
112	EPI_ISL_11698108	Bangkok	Male	Released		L24del			S373P	Q493R	N969K	H655Y		V213G	G142D	A27S	Q954H	N501Y	P25del	T19I	N440K	N679K	N764K		Y505H			D796Y	S371F	T478K		K417N			T376A	R408S		G339D	P681H			S375F	Q498R		S477N	D405N		E484A	P26del
113	EPI_ISL_11698109	Bangkok	Male	Released		L24del			S373P	Q493R	N969K	H655Y		V213G	G142D	A27S	Q954H	N501Y	P25del	T19I	N440K	N679K	N764K		Y505H			D796Y	S371F	T478K		K417N			T376A	R408S		G339D	P681H			S375F	Q498R		S477N	D405N		E484A	P26del
114	EPI_ISL_11698110	Bangkok	Female	Released		L24del			S373P	Q493R	N969K	H655Y		V213G	G142D	A27S	Q954H	N501Y	P25del	T19I	N440K	N679K	N764K		Y505H			D796Y	S371F	T478K		K417N			T376A	R408S		G339D	P681H			S375F	Q498R		S477N	D405N		E484A	P26del
115	EPI_ISL_11698112	Bangkok	Female	Released		L24del			S373P	Q493R	N969K	H655Y		V213G	G142D	A27S	Q954H	N501Y	P25del	T19I	N440K	N679K	N764K		Y505H			D796Y	S371F	T478K		K417N			T376A	R408S		G339D	P681H			S375F	Q498R		S477N	D405N		E484A	P26del
116	EPI_ISL_11698114	Bangkok	Female	Released		L24del			S373P	Q493R	N969K	H655Y		V213G	G142D	A27S	Q954H	N501Y	P25del	T19I	N440K	N679K	N764K		Y505H			D796Y	S371F	T478K		K417N			T376A	R408S		G339D	P681H			S375F	Q498R		S477N	D405N		E484A	P26del
117	EPI_ISL_11711750	Bangkok	Male	Released		L24del			S373P	Q493R	N969K	H655Y		V213G	G142D	A27S	Q954H	N501Y	P25del	T19I	N440K	N679K	N764K		Y505H			D796Y	S371F	T478K		K417N			T376A	R408S		G339D	P681H			S375F	Q498R		S477N	D405N		E484A	P26del
118	EPI_ISL_11711931	Bangkok	Male	Released		L24del			S373P	Q493R	N969K	H655Y		V213G	G142D	A27S	Q954H	N501Y	P25del	T19I	N440K	N679K	N764K		Y505H			D796Y	S371F	T478K		K417N			T376A	R408S		G339D	P681H			S375F	Q498R		S477N	D405N		E484A	P26del
119	EPI_ISL_11712097	Bangkok	Female	Released		L24del			S373P	Q493R	N969K	H655Y		V213G	G142D	A27S	Q954H	N501Y	P25del	T19I	N440K	N679K	N764K		Y505H			D796Y	S371F	T478K		K417N			T376A	R408S		G339D	P681H			S375F	Q498R		S477N	D405N		E484A	P26del
120	EPI_ISL_11713775	Bangkok	Female	Released		L24del			S373P	Q493R	N969K	H655Y		V213G	G142D	A27S	Q954H	N501Y	P25del	T19I	N440K	N679K	N764K		Y505H			D796Y	S371F	T478K		K417N			T376A	R408S		G339D	P681H			S375F	Q498R		S477N	D405N		E484A	P26del
121	EPI_ISL_11714002	Bangkok	Female	Released		L24del			S373P	Q493R	N969K	H655Y		V213G	G142D	A27S	Q954H	N501Y	P25del	T19I	N440K	N679K	N764K		Y505H			D796Y	S371F	T478K		K417N			T376A	R408S		G339D	P681H			S375F	Q498R		S477N	D405N		E484A	P26del
122	EPI_ISL_11714167	Bangkok	Female	Released		L24del			S373P	Q493R	N969K	H655Y		V213G	G142D	A27S	Q954H	N501Y	P25del	T19I	N440K	N679K	N764K		Y505H			D796Y	S371F	T478K		K417N			T376A	R408S		G339D	P681H			S375F	Q498R		S477N	D405N		E484A	P26del
123	EPI_ISL_11714580	Bangkok	Male	Released		L24del			S373P	Q493R	N969K	H655Y		V213G	G142D	A27S	Q954H	N501Y	P25del	T19I	N440K	N679K	N764K		Y505H			D796Y	S371F	T478K		K417N			T376A	R408S		G339D	P681H			S375F	Q498R		S477N	D405N		E484A	P26del
124	EPI_ISL_11738980	Trang	Male	Deceased	H69del		T95I	A67V			N969K	H655Y	N856K		G142D		Q954H					N679K	N764K				T547K	D796Y			V143del								P681H
125	EPI_ISL_11753520	Trang	Female	Deceased	H69del		T95I	A67V	S373P	Q493R	N969K	H655Y	N856K		G142D		Q954H	N501Y				N679K	N764K	L212I	Y505H		T547K	D796Y		T478K	V143del			G496S			S371L	G339D	P681H	Y144del	ins214EPE	S375F	Q498R		S477N		N211del	E484A
126	EPI_ISL_11753522	Trang	Male	Deceased		L24del			S373P	Q493R	N969K	H655Y		V213G	G142D	A27S	Q954H	N501Y	P25del	T19I		N679K	N764K		Y505H			D796Y	S371F	T478K								G339D	P681H			S375F	Q498R		S477N			E484A	P26del
127	EPI_ISL_11754783	Samut Prakan	Female	Deceased	H69del		T95I	A67V	S373P		N969K	H655Y	N856K		G142D		Q954H					N679K	N764K				T547K	D796Y	S371F		V143del	K417N			T376A	R408S			P681H	Y144del		S375F				D405N
128	EPI_ISL_11754785	Lamphun	Female	Deceased	H69del		T95I	A67V			N969K	H655Y	N856K		G142D		Q954H					N679K	N764K				T547K	D796Y			V143del								P681H
129	EPI_ISL_11871257	Samut Prakan	unknown	Deceased		L24del			S373P	Q493R	N969K	H655Y		V213G	G142D	A27S	Q954H	N501Y	P25del	T19I		N679K	N764K		Y505H			D796Y	S371F	T478K		K417N			T376A			G339D	P681H			S375F	Q498R		S477N	D405N		E484A	P26del
130	EPI_ISL_12139994	Phrae	Male	Death		L24del			S373P	Q493R	N969K	H655Y		V213G	G142D	A27S	Q954H	N501Y	P25del	T19I		N679K	N764K		Y505H			D796Y	S371F	T478K		K417N			T376A	R408S		G339D	P681H			S375F	Q498R		S477N	D405N		E484A	P26del
131	EPI_ISL_12141415	Trang	Female	Death		L24del			S373P	Q493R	N969K	H655Y		V213G	G142D	A27S	Q954H	N501Y	P25del	T19I	N440K	N679K	N764K		Y505H			D796Y	S371F	T478K		K417N			T376A	R408S		G339D	P681H			S375F	Q498R		S477N	D405N		E484A	P26del
132	EPI_ISL_12141418	Trang	Female	Death	H69del		T95I	A67V	S373P	Q493R	N969K	H655Y	N856K		G142D		Q954H	N501Y			N440K	N679K	N764K	L212I	Y505H	R346K	T547K	D796Y		T478K	V143del	K417N		G496S			S371L	G339D	P681H	Y144del	ins214EPE	S375F	Q498R	G446S	S477N		N211del	E484A
133	EPI_ISL_12141445	Chon Buri	Male	Death		L24del			S373P	Q493R	N969K	H655Y		V213G	G142D	A27S	Q954H	N501Y	P25del	T19I	N440K	N679K	N764K		Y505H			D796Y	S371F	T478K		K417N			T376A	R408S		G339D	P681H			S375F	Q498R		S477N	D405N		E484A	P26del
134	EPI_ISL_12143830	Trang	Male	Deceased	H69del	L24del	T95I	A67V		Q493R	N969K	H655Y		V213G	G142D	A27S	Q954H	N501Y	P25del	T19I		N679K			Y505H			D796Y											P681H				Q498R					E484A	P26del
135	EPI_ISL_12176266	Bangkok	Female	Released	H69del		T95I	A67V	S373P	Q493R	N969K	H655Y	N856K		G142D		Q954H	N501Y			N440K	N679K	N764K	L212I	Y505H	R346K	T547K	D796Y		T478K	V143del	K417N		G496S			S371L	G339D	P681H	Y144del	ins214EPE	S375F	Q498R	G446S	S477N		N211del	E484A
136	EPI_ISL_12176267	Bangkok	Male	Released	H69del		T95I	A67V	S373P	Q493R	N969K	H655Y	N856K		G142D		Q954H	N501Y			N440K	N679K	N764K	L212I	Y505H		T547K	D796Y		T478K	V143del	K417N		G496S			S371L	G339D	P681H	Y144del	ins214EPE	S375F	Q498R	G446S	S477N		N211del	E484A
137	EPI_ISL_12176268	Bangkok	Male	Released	H69del		T95I	A67V	S373P	Q493R	N969K	H655Y	N856K		G142D		Q954H	N501Y			N440K	N679K	N764K	L212I	Y505H	R346K	T547K	D796Y		T478K	V143del	K417N		G496S			S371L	G339D	P681H	Y144del	ins214EPE	S375F	Q498R	G446S	S477N		N211del	E484A
138	EPI_ISL_12176269	Bangkok	Female	Released	H69del		T95I	A67V	S373P	Q493R	N969K	H655Y	N856K		G142D		Q954H	N501Y			N440K	N679K	N764K	L212I	Y505H		T547K	D796Y		T478K	V143del	K417N		G496S			S371L	G339D	P681H	Y144del	ins214EPE	S375F	Q498R	G446S	S477N		N211del	E484A
139	EPI_ISL_12176324	Bangkok	Male	Released	H69del		T95I	A67V	S373P	Q493R	N969K	H655Y	N856K		G142D		Q954H	N501Y			N440K	N679K	N764K	L212I	Y505H	R346K	T547K	D796Y		T478K	V143del	K417N		G496S			S371L	G339D	P681H	Y144del	ins214EPE	S375F	Q498R	G446S	S477N		N211del	E484A
140	EPI_ISL_12290967	Chiang Rai	Male	Death		L24del			S373P	Q493R	N969K	H655Y		V213G	G142D	A27S	Q954H	N501Y	P25del	T19I	N440K	N679K	N764K		Y505H			D796Y	S371F	T478K		K417N			T376A	R408S		G339D	P681H			S375F	Q498R		S477N	D405N		E484A	P26del
141	EPI_ISL_12290969	Chiang Rai	Female	Death		L24del			S373P	Q493R	N969K	H655Y		V213G	G142D	A27S	Q954H	N501Y	P25del	T19I	N440K	N679K	N764K		Y505H			D796Y	S371F	T478K		K417N			T376A	R408S		G339D	P681H			S375F	Q498R		S477N	D405N		E484A	P26del
142	EPI_ISL_12387073	Bangkok	Male	Released	H69del		T95I	A67V	S373P	Q493R	N969K	H655Y	N856K		G142D		Q954H	N501Y			N440K	N679K	N764K	L212I	Y505H		T547K	D796Y		T478K	V143del	K417N		G496S			S371L	G339D	P681H	Y144del	ins214EPE	S375F	Q498R	G446S	S477N		N211del	E484A
143	EPI_ISL_12394871	Bangkok	Male	Released	H69del		T95I	A67V	S373P	Q493R	N969K	H655Y	N856K		G142D		Q954H	N501Y			N440K	N679K	N764K	L212I	Y505H	R346K	T547K	D796Y		T478K	V143del	K417N		G496S			S371L	G339D	P681H	Y144del	ins214EPE	S375F	Q498R	G446S	S477N		N211del	E484A
144	EPI_ISL_12394872	Bangkok	Male	Released	H69del		T95I	A67V	S373P	Q493R	N969K	H655Y	N856K		G142D		Q954H	N501Y			N440K	N679K	N764K	L212I	Y505H	R346K	T547K	D796Y		T478K	V143del	K417N		G496S			S371L	G339D	P681H	Y144del	ins214EPE	S375F	Q498R	G446S	S477N		N211del	E484A
145	EPI_ISL_12394873	Bangkok	Male	Released	H69del		T95I	A67V	S373P	Q493R	N969K	H655Y	N856K		G142D		Q954H	N501Y			N440K	N679K	N764K	L212I	Y505H	R346K	T547K	D796Y		T478K	V143del	K417N		G496S			S371L	G339D	P681H	Y144del	ins214EPE	S375F	Q498R	G446S	S477N		N211del	E484A
146	EPI_ISL_12394964	Bangkok	Female	Released	H69del		T95I	A67V	S373P	Q493R	N969K	H655Y	N856K		G142D		Q954H	N501Y			N440K	N679K	N764K	L212I	Y505H	R346K	T547K	D796Y		T478K	V143del	K417N		G496S			S371L	G339D	P681H	Y144del	ins214EPE	S375F	Q498R	G446S	S477N		N211del	E484A
147	EPI_ISL_12394973	Bangkok	Female	Released		L24del			S373P	Q493R	N969K	H655Y		V213G	G142D	A27S	Q954H	N501Y	P25del	T19I	N440K	N679K	N764K		Y505H			D796Y	S371F	T478K		K417N			T376A	R408S		G339D	P681H			S375F	Q498R		S477N	D405N		E484A	P26del
148	EPI_ISL_12394981	Bangkok	Male	Released		L24del			S373P	Q493R	N969K	H655Y		V213G	G142D	A27S	Q954H	N501Y	P25del	T19I	N440K	N679K	N764K		Y505H			D796Y	S371F	T478K		K417N			T376A	R408S		G339D	P681H			S375F	Q498R		S477N	D405N		E484A	P26del
149	EPI_ISL_12394982	Bangkok	Male	Released		L24del			S373P	Q493R	N969K	H655Y		V213G	G142D	A27S	Q954H	N501Y	P25del	T19I	N440K	N679K	N764K		Y505H			D796Y	S371F	T478K		K417N			T376A	R408S		G339D	P681H			S375F	Q498R		S477N	D405N		E484A	P26del
150	EPI_ISL_12394983	Bangkok	Female	Released		L24del			S373P	Q493R	N969K	H655Y		V213G	G142D	A27S	Q954H	N501Y	P25del	T19I	N440K	N679K	N764K		Y505H			D796Y	S371F	T478K		K417N			T376A	R408S		G339D	P681H			S375F	Q498R		S477N	D405N		E484A	P26del
151	EPI_ISL_12394996	Bangkok	Male	Released		L24del			S373P	Q493R	N969K	H655Y		V213G	G142D	A27S	Q954H	N501Y	P25del	T19I	N440K	N679K	N764K		Y505H			D796Y	S371F	T478K		K417N			T376A	R408S		G339D	P681H			S375F	Q498R		S477N	D405N		E484A	P26del
152	EPI_ISL_12395008	Bangkok	Female	Released		L24del			S373P	Q493R	N969K	H655Y		V213G	G142D	A27S	Q954H	N501Y	P25del	T19I	N440K	N679K	N764K		Y505H			D796Y	S371F	T478K		K417N			T376A	R408S		G339D	P681H			S375F	Q498R		S477N	D405N		E484A	P26del
153	EPI_ISL_12395018	Bangkok	Female	Released		L24del			S373P	Q493R	N969K	H655Y		V213G	G142D	A27S	Q954H	N501Y	P25del	T19I	N440K	N679K	N764K		Y505H			D796Y	S371F	T478K		K417N			T376A	R408S		G339D	P681H			S375F	Q498R		S477N	D405N		E484A	P26del
154	EPI_ISL_12395049	Bangkok	Male	Released		L24del			S373P	Q493R	N969K	H655Y		V213G	G142D	A27S	Q954H	N501Y	P25del	T19I	N440K	N679K	N764K		Y505H			D796Y	S371F	T478K		K417N			T376A	R408S		G339D	P681H			S375F	Q498R		S477N	D405N		E484A	P26del
155	EPI_ISL_12473749	Chiang Mai	Female	Death		L24del			S373P	Q493R	N969K	H655Y		V213G	G142D	A27S	Q954H	N501Y	P25del	T19I	N440K	N679K	N764K		Y505H			D796Y	S371F	T478K		K417N			T376A	R408S		G339D	P681H			S375F	Q498R		S477N	D405N		E484A	P26del
156	EPI_ISL_12473750	Chiang Mai	Male	Death		L24del			S373P	Q493R	N969K	H655Y		V213G	G142D	A27S	Q954H	N501Y	P25del	T19I	N440K	N679K	N764K		Y505H			D796Y	S371F	T478K		K417N			T376A	R408S		G339D	P681H			S375F	Q498R		S477N	D405N		E484A	P26del
157	EPI_ISL_12473751	Chiang Mai	Female	Death		L24del			S373P	Q493R	N969K	H655Y		V213G	G142D	A27S	Q954H	N501Y	P25del	T19I	N440K	N679K	N764K		Y505H			D796Y	S371F	T478K		K417N			T376A	R408S		G339D	P681H			S375F	Q498R		S477N	D405N		E484A	P26del
158	EPI_ISL_12476408	Bangkok	Male	Deceased		L24del			S373P	Q493R	N969K	H655Y		V213G	G142D	A27S	Q954H	N501Y	P25del	T19I		N679K	N764K		Y505H			D796Y	S371F	T478K		K417N			T376A	R408S		G339D	P681H			S375F	Q498R		S477N	D405N		E484A	P26del
159	EPI_ISL_12651346	Samut Prakan	Female	Deceased	H69del		T95I	A67V	S373P	Q493R	N969K	H655Y	N856K		G142D		Q954H	N501Y				N679K	N764K	L212I	Y505H	R346K	T547K	D796Y		T478K	V143del			G496S			S371L	G339D	P681H	Y144del	ins214EPE	S375F	Q498R		S477N		N211del	E484A
160	EPI_ISL_12651353	Samut Prakan	Male	Deceased		L24del			S373P	Q493R	N969K	H655Y		V213G	G142D	A27S	Q954H	N501Y	P25del	T19I	N440K	N679K	N764K		Y505H			D796Y	S371F	T478K		K417N			T376A	R408S		G339D	P681H			S375F	Q498R		S477N	D405N		E484A	P26del
161	EPI_ISL_12727219	Lamphun	Male	Death		L24del			S373P	Q493R	N969K	H655Y		V213G	G142D	A27S	Q954H	N501Y	P25del	T19I		N679K	N764K		Y505H			D796Y	S371F	T478K					T376A			G339D	P681H			S375F	Q498R		S477N			E484A	P26del
162	EPI_ISL_12727585	Chiang Rai	Female	Death		L24del			S373P	Q493R	N969K	H655Y		V213G	G142D	A27S	Q954H	N501Y	P25del	T19I	N440K	N679K	N764K		Y505H			D796Y	S371F	T478K		K417N			T376A	R408S		G339D	P681H			S375F	Q498R		S477N	D405N		E484A	P26del
163	EPI_ISL_12727587	Chiang Rai	Male	Death	H69del		T95I	A67V	S373P	Q493R	N969K	H655Y	N856K		G142D		Q954H	N501Y				N679K	N764K	L212I	Y505H	R346K	T547K	D796Y		T478K	V143del			G496S			S371L	G339D	P681H	Y144del	ins214EPE	S375F	Q498R		S477N		N211del	E484A
164	EPI_ISL_12727588	Chiang Rai	Male	Death		L24del			S373P	Q493R	N969K	H655Y		V213G	G142D	A27S	Q954H	N501Y	P25del	T19I	N440K	N679K	N764K		Y505H			D796Y	S371F	T478K		K417N			T376A	R408S		G339D	P681H			S375F	Q498R		S477N	D405N		E484A	P26del
165	EPI_ISL_12727590	Chiang Rai	Male	Death		L24del			S373P	Q493R	N969K	H655Y		V213G	G142D	A27S	Q954H	N501Y	P25del	T19I	N440K	N679K	N764K		Y505H			D796Y	S371F	T478K		K417N			T376A	R408S		G339D	P681H			S375F	Q498R		S477N	D405N		E484A	P26del
166	EPI_ISL_12727591	Chiang Rai	Female	Death		L24del			S373P	Q493R	N969K	H655Y		V213G	G142D	A27S	Q954H	N501Y	P25del	T19I		N679K	N764K		Y505H			D796Y	S371F	T478K					T376A			G339D	P681H			S375F	Q498R		S477N			E484A	P26del
167	EPI_ISL_12727592	Chiang Rai	Male	Death		L24del				Q493R	N969K	H655Y		V213G	G142D	A27S	Q954H	N501Y	P25del	T19I		N679K			Y505H			D796Y		T478K									P681H				Q498R		S477N			E484A	P26del
168	EPI_ISL_12727593	Chiang Rai	Female	Death		L24del			S373P	Q493R	N969K	H655Y		V213G	G142D	A27S	Q954H	N501Y	P25del	T19I	N440K	N679K	N764K		Y505H			D796Y	S371F	T478K		K417N			T376A	R408S		G339D	P681H			S375F	Q498R		S477N	D405N		E484A	P26del
169	EPI_ISL_12738967	Lamphun	Male	Deceased		L24del				Q493R	N969K	H655Y		V213G	G142D	A27S	Q954H	N501Y	P25del	T19I		N679K			Y505H			D796Y		T478K									P681H				Q498R		S477N			E484A	P26del
170	EPI_ISL_12839423	Trat	Male	Deceased		L24del			S373P	Q493R	N969K	H655Y		V213G	G142D	A27S	Q954H	N501Y	P25del	T19I		N679K	N764K		Y505H			D796Y	S371F	T478K					T376A			G339D	P681H			S375F	Q498R		S477N	D405N		E484A	P26del
171	EPI_ISL_12839436	Chon Buri	Male	Deceased		L24del			S373P	Q493R	N969K	H655Y		V213G	G142D	A27S	Q954H	N501Y	P25del	T19I	N440K	N679K	N764K		Y505H			D796Y	S371F	T478K					T376A			G339D	P681H			S375F	Q498R		S477N	D405N		E484A	P26del
172	EPI_ISL_12839460	Samut Prakan	Male	Deceased		L24del			S373P	Q493R	N969K	H655Y		V213G	G142D	A27S	Q954H	N501Y	P25del	T19I		N679K	N764K		Y505H			D796Y	S371F	T478K					T376A			G339D	P681H			S375F	Q498R		S477N	D405N		E484A	P26del
173	EPI_ISL_12861835	Trang	Male	Death		L24del				Q493R	N969K	H655Y		V213G	G142D	A27S	Q954H	N501Y	P25del	T19I		N679K			Y505H			D796Y		T478K													Q498R		S477N			E484A	P26del
174	EPI_ISL_13158832	Chiang Mai	Female	Deceased		L24del			S373P	Q493R	N969K	H655Y		V213G	G142D	A27S	Q954H	N501Y	P25del	T19I	N440K	N679K	N764K		Y505H			D796Y	S371F	T478K		K417N			T376A	R408S		G339D	P681H			S375F	Q498R		S477N	D405N		E484A	P26del
175	EPI_ISL_13207871	Chon Buri	Male	Deceased	H69del		T95I	A67V	S373P	Q493R	N969K	H655Y	N856K		G142D		Q954H	N501Y		T19I		N679K	N764K	L212I	Y505H	R346K	T547K	D796Y		T478K	V143del			G496S			S371L	G339D	P681H	Y144del	ins214EPE	S375F	Q498R		S477N		N211del	E484A
176	EPI_ISL_13835424	Bangkok	Male	Hospitalized		L24del			S373P	Q493R	N969K	H655Y		V213G	G142D	A27S	Q954H	N501Y	P25del	T19I	N440K	N679K	N764K		Y505H			D796Y	S371F	T478K		K417N			T376A	R408S		G339D	P681H			S375F	Q498R		S477N	D405N		E484A	P26del
177	EPI_ISL_14302528	Phuket	Male	Deceased	H69del	L24del			S373P		N969K	H655Y		V213G	G142D	A27S	Q954H	N501Y	P25del	T19I	N440K	N679K	N764K		Y505H			D796Y	S371F	T478K		K417N	F486V		T376A	R408S		G339D	P681H			S375F	Q498R		S477N	D405N		E484A	P26del
178	EPI_ISL_14302545	Nakhon Sawan	Female	Deceased		L24del			S373P	Q493R	N969K	H655Y		V213G	G142D	A27S	Q954H	N501Y	P25del	T19I		N679K	N764K		Y505H			D796Y	S371F	T478K		K417N			T376A	R408S		G339D	P681H			S375F	Q498R		S477N	D405N		E484A	P26del
179	EPI_ISL_14438264	Bangkok	Male	Deceased	H69del	L24del			S373P		N969K	H655Y		V213G	G142D	A27S	Q954H	N501Y	P25del	T19I	N440K	N679K	N764K		Y505H			D796Y	S371F	T478K		K417N	F486V		T376A			G339D	P681H			S375F	Q498R		S477N	D405N		E484A	P26del
180	EPI_ISL_14438301	Bangkok	Male	Deceased	H69del	L24del			S373P		N969K	H655Y		V213G	G142D	A27S	Q954H	N501Y	P25del	T19I	N440K	N679K	N764K		Y505H			D796Y	S371F	T478K		K417N	F486V		T376A	R408S		G339D	P681H			S375F	Q498R		S477N	D405N		E484A	P26del
181	EPI_ISL_14438306	Bangkok	Male	Deceased	H69del	L24del			S373P		N969K	H655Y		V213G	G142D	A27S	Q954H	N501Y	P25del	T19I	N440K	N679K	N764K		Y505H			D796Y	S371F	T478K		K417N	F486V		T376A	R408S		G339D	P681H			S375F	Q498R		S477N	D405N		E484A	P26del
182	EPI_ISL_14438307	Bangkok	Female	Deceased	H69del	L24del			S373P		N969K	H655Y		V213G	G142D	A27S	Q954H	N501Y	P25del	T19I	N440K	N679K	N764K		Y505H			D796Y	S371F	T478K		K417N	F486V		T376A	R408S		G339D	P681H			S375F	Q498R		S477N	D405N		E484A	P26del
183	EPI_ISL_14438309	Bangkok	Female	Deceased	H69del	L24del			S373P		N969K	H655Y		V213G	G142D	A27S	Q954H	N501Y	P25del	T19I		N679K			Y505H			D796Y	S371F	T478K			F486V		T376A			G339D	P681H			S375F	Q498R		S477N	D405N		E484A	P26del
184	EPI_ISL_14438310	Bangkok	Female	Deceased	H69del	L24del			S373P		N969K	H655Y		V213G	G142D	A27S	Q954H	N501Y	P25del	T19I	N440K	N679K	N764K		Y505H			D796Y	S371F	T478K		K417N	F486V		T376A	R408S		G339D	P681H			S375F	Q498R		S477N	D405N		E484A	P26del
185	EPI_ISL_14438311	Bangkok	Male	Deceased	H69del	L24del			S373P		N969K	H655Y		V213G	G142D	A27S	Q954H	N501Y	P25del	T19I	N440K	N679K	N764K		Y505H			D796Y	S371F	T478K		K417N	F486V		T376A	R408S		G339D	P681H			S375F	Q498R		S477N	D405N		E484A	P26del
186	EPI_ISL_14438413	Bangkok	Male	Deceased	H69del	L24del			S373P		N969K	H655Y		V213G	G142D	A27S	Q954H	N501Y	P25del	T19I	N440K	N679K			Y505H			D796Y	S371F	T478K		K417N	F486V		T376A	R408S		G339D	P681H			S375F	Q498R		S477N	D405N		E484A	P26del
187	EPI_ISL_14438416	Bangkok	Male	Deceased		L24del			S373P		N969K	H655Y		V213G	G142D	A27S	Q954H	N501Y	P25del	T19I		N679K			Y505H			D796Y	S371F	T478K					T376A	R408S		G339D	P681H			S375F	Q498R		S477N	D405N		E484A	P26del
188	EPI_ISL_14438417	Bangkok	Female	Deceased	H69del	L24del			S373P		N969K	H655Y		V213G	G142D	A27S	Q954H	N501Y	P25del	T19I	N440K	N679K	N764K		Y505H			D796Y	S371F	T478K		K417N	F486V		T376A	R408S		G339D	P681H			S375F	Q498R		S477N	D405N		E484A	P26del
189	EPI_ISL_14438461	Bangkok	Female	Deceased	H69del	L24del			S373P		N969K	H655Y		V213G	G142D	A27S	Q954H	N501Y	P25del	T19I	N440K	N679K			Y505H			D796Y	S371F	T478K		K417N	F486V		T376A	R408S		G339D	P681H			S375F	Q498R		S477N	D405N		E484A	P26del
190	EPI_ISL_14438464	Chon Buri	Female	Deceased	H69del	L24del			S373P		N969K	H655Y		V213G	G142D	A27S	Q954H	N501Y	P25del	T19I		N679K	N764K		Y505H			D796Y	S371F	T478K			F486V		T376A	R408S		G339D	P681H			S375F	Q498R		S477N	D405N		E484A	P26del
191	EPI_ISL_14438465	Chon Buri	Male	Deceased	H69del	L24del			S373P		N969K	H655Y		V213G	G142D	A27S	Q954H	N501Y	P25del	T19I	N440K	N679K	N764K		Y505H			D796Y	S371F	T478K		K417N	F486V		T376A	R408S		G339D	P681H			S375F	Q498R		S477N	D405N		E484A	P26del
192	EPI_ISL_14438548	Chon Buri	Female	Deceased	H69del	L24del			S373P		N969K	H655Y		V213G	G142D	A27S	Q954H	N501Y	P25del	T19I	N440K	N679K	N764K		Y505H			D796Y	S371F	T478K		K417N	F486V		T376A	R408S		G339D	P681H			S375F	Q498R		S477N	D405N		E484A	P26del
193	EPI_ISL_14438549	Chon Buri	Male	Deceased	H69del	L24del			S373P		N969K	H655Y		V213G	G142D	A27S	Q954H	N501Y	P25del	T19I	N440K	N679K	N764K		Y505H			D796Y	S371F	T478K		K417N	F486V		T376A	R408S		G339D	P681H			S375F	Q498R		S477N	D405N		E484A	P26del
194	EPI_ISL_14438557	Chon Buri	Female	Deceased	H69del	L24del			S373P		N969K	H655Y		V213G	G142D	A27S	Q954H	N501Y	P25del	T19I	N440K	N679K	N764K		Y505H			D796Y	S371F	T478K		K417N	F486V		T376A	R408S		G339D	P681H			S375F	Q498R		S477N	D405N		E484A	P26del
195	EPI_ISL_14438558	Chon Buri	Female	Deceased	H69del	L24del			S373P		N969K	H655Y		V213G	G142D	A27S	Q954H	N501Y	P25del	T19I	N440K	N679K	N764K		Y505H			D796Y	S371F	T478K		K417N	F486V		T376A	R408S		G339D	P681H			S375F	Q498R		S477N	D405N		E484A	P26del
196	EPI_ISL_14438559	Chon Buri	Male	Deceased	H69del	L24del			S373P		N969K	H655Y		V213G	G142D	A27S	Q954H	N501Y	P25del	T19I	N440K	N679K	N764K		Y505H			D796Y	S371F	T478K		K417N	F486V		T376A	R408S		G339D	P681H			S375F	Q498R		S477N	D405N		E484A	P26del
197	EPI_ISL_14438563	Chon Buri	Male	Deceased		L24del					N969K	H655Y		V213G	G142D	A27S	Q954H	N501Y	P25del	T19I		N679K			Y505H					T478K									P681H				Q498R		S477N			E484A	P26del
198	EPI_ISL_14438566	Chon Buri	Female	Deceased	H69del	L24del			S373P		N969K	H655Y		V213G	G142D	A27S	Q954H	N501Y	P25del	T19I	N440K	N679K	N764K		Y505H			D796Y	S371F	T478K		K417N	F486V		T376A	R408S		G339D	P681H			S375F	Q498R		S477N	D405N		E484A	P26del
199	EPI_ISL_14438568	Chon Buri	Male	Deceased	H69del	L24del			S373P		N969K	H655Y		V213G	G142D	A27S	Q954H	N501Y	P25del	T19I	N440K	N679K			Y505H			D796Y	S371F	T478K		K417N	F486V		T376A			G339D	P681H			S375F	Q498R		S477N	D405N		E484A	P26del
200	EPI_ISL_14438569	Chon Buri	Male	Deceased	H69del	L24del			S373P		N969K	H655Y		V213G	G142D	A27S	Q954H	N501Y	P25del	T19I	N440K	N679K			Y505H			D796Y	S371F	T478K		K417N	F486V		T376A	R408S		G339D	P681H			S375F	Q498R		S477N	D405N		E484A	P26del
201	EPI_ISL_14438570	Samut Prakan	Male	Deceased		L24del			S373P	Q493R	N969K	H655Y		V213G	G142D	A27S	Q954H	N501Y	P25del	T19I		N679K			Y505H			D796Y	S371F	T478K					T376A			G339D	P681H			S375F	Q498R		S477N	D405N		E484A	P26del
202	EPI_ISL_14438598	Samut Prakan	Female	Deceased	H69del	L24del			S373P		N969K	H655Y		V213G	G142D	A27S	Q954H	N501Y	P25del	T19I	N440K	N679K	N764K		Y505H			D796Y	S371F	T478K		K417N	F486V		T376A	R408S		G339D	P681H			S375F	Q498R		S477N	D405N		E484A	P26del
203	EPI_ISL_14438599	Samut Prakan	Male	Deceased	H69del	L24del			S373P		N969K	H655Y		V213G	G142D	A27S	Q954H	N501Y	P25del	T19I	N440K	N679K	N764K		Y505H			D796Y	S371F	T478K		K417N	F486V		T376A	R408S		G339D	P681H			S375F	Q498R		S477N	D405N		E484A	P26del
204	EPI_ISL_14725597	Phrae	Male	Death	H69del	L24del			S373P		N969K			V213G		A27S	Q954H	N501Y	P25del	T19I			N764K		Y505H			D796Y	S371F	T478K		K417N	F486V		T376A	R408S		G339D				S375F	Q498R		S477N	D405N		E484A	P26del
205	EPI_ISL_14810409	Bangkok	Female	Death	H69del	L24del			S373P		N969K			V213G	G142D	A27S	Q954H	N501Y	P25del	T19I	N440K	N679K	N764K		Y505H			D796Y	S371F	T478K		K417N	F486V		T376A	R408S		G339D	P681H	Y144del		S375F	Q498R		S477N	D405N		E484A	P26del
206	EPI_ISL_15015285	Chon Buri	Male	Deceased	H69del	L24del			S373P		N969K	H655Y		V213G	G142D	A27S	Q954H	N501Y	P25del	T19I		N679K			Y505H			D796Y	S371F	T478K			F486V		T376A			G339D	P681H			S375F	Q498R		S477N	D405N		E484A	P26del
207	EPI_ISL_15015290	Samut Prakan	Male	Deceased	H69del	L24del			S373P		N969K	H655Y		V213G	G142D	A27S	Q954H	N501Y	P25del	T19I	N440K	N679K	N764K		Y505H			D796Y	S371F	T478K		K417N	F486V		T376A	R408S		G339D	P681H			S375F	Q498R		S477N	D405N		E484A	P26del
208	EPI_ISL_15015297	Chon Buri	Female	Deceased	H69del	L24del			S373P		N969K	H655Y		V213G	G142D	A27S	Q954H	N501Y	P25del	T19I		N679K			Y505H			D796Y	S371F	T478K			F486V		T376A	R408S		G339D	P681H			S375F	Q498R		S477N	D405N		E484A	P26del
209	EPI_ISL_15015327	Samut Prakan	Female	Deceased		L24del			S373P		N969K	H655Y		V213G	G142D	A27S	Q954H	N501Y	P25del	T19I		N679K			Y505H			D796Y	S371F	T478K			F486V		T376A			G339D	P681H			S375F	Q498R		S477N	D405N		E484A	P26del
210	EPI_ISL_15015328	Chon Buri	Male	Deceased	H69del	L24del			S373P		N969K	H655Y		V213G	G142D	A27S	Q954H	N501Y	P25del	T19I	N440K	N679K			Y505H			D796Y	S371F	T478K		K417N	F486V		T376A			G339D	P681H			S375F	Q498R		S477N	D405N		E484A	P26del
211	EPI_ISL_15015333	Bangkok	Female	Deceased	H69del	L24del			S373P		N969K	H655Y		V213G	G142D	A27S	Q954H	N501Y	P25del	T19I	N440K	N679K	N764K		Y505H			D796Y	S371F	T478K		K417N	F486V		T376A	R408S		G339D	P681H			S375F	Q498R		S477N	D405N		E484A	P26del
212	EPI_ISL_15015335	Chon Buri	Female	Deceased	H69del	L24del			S373P		N969K	H655Y		V213G	G142D	A27S	Q954H	N501Y	P25del	T19I		N679K			Y505H			D796Y	S371F	T478K			F486V		T376A			G339D	P681H			S375F	Q498R		S477N	D405N		E484A	P26del
213	EPI_ISL_15015342	Samut Prakan	Female	Deceased	H69del	L24del			S373P		N969K	H655Y		V213G	G142D	A27S	Q954H	N501Y	P25del	T19I	N440K	N679K			Y505H			D796Y	S371F	T478K		K417N	F486V		T376A	R408S		G339D	P681H			S375F	Q498R		S477N	D405N		E484A	P26del
214	EPI_ISL_15015343	Chon Buri	Female	Deceased	H69del	L24del			S373P		N969K	H655Y		V213G	G142D	A27S	Q954H	N501Y	P25del	T19I	N440K	N679K	N764K		Y505H			D796Y	S371F	T478K		K417N	F486V		T376A	R408S		G339D	P681H			S375F	Q498R		S477N	D405N		E484A	P26del
215	EPI_ISL_15015344	Bangkok	Male	Deceased	H69del	L24del			S373P		N969K	H655Y		V213G	G142D	A27S	Q954H	N501Y	P25del	T19I	N440K	N679K			Y505H			D796Y	S371F	T478K		K417N	F486V		T376A	R408S		G339D	P681H			S375F	Q498R		S477N	D405N		E484A	P26del
216	EPI_ISL_15015351	Bangkok	Female	Deceased	H69del	L24del			S373P		N969K	H655Y		V213G	G142D	A27S	Q954H	N501Y	P25del	T19I		N679K			Y505H			D796Y	S371F	T478K			F486V		T376A			G339D	P681H			S375F	Q498R		S477N	D405N		E484A	P26del
217	EPI_ISL_15232912	Lamphun	Male	Deceased	H69del	L24del			S373P		N969K	H655Y		V213G	G142D	A27S	Q954H	N501Y	P25del	T19I	N440K	N679K	N764K		Y505H			D796Y	S371F	T478K		K417N	F486V		T376A	R408S		G339D	P681H			S375F	Q498R		S477N	D405N		E484A	P26del
218	EPI_ISL_15233038	Samut Sakhon	Male	Deceased	H69del	L24del			S373P		N969K	H655Y		V213G	G142D	A27S	Q954H	N501Y	P25del	T19I	N440K	N679K	N764K		Y505H			D796Y	S371F	T478K		K417N	F486V		T376A	R408S		G339D	P681H			S375F	Q498R		S477N	D405N		E484A	P26del
219	EPI_ISL_15233046	Samut Sakhon	Female	Deceased	H69del	L24del			S373P		N969K	H655Y		V213G	G142D	A27S	Q954H	N501Y	P25del	T19I	N440K	N679K	N764K		Y505H			D796Y	S371F	T478K		K417N	F486V		T376A	R408S		G339D	P681H			S375F	Q498R		S477N	D405N		E484A	P26del
220	EPI_ISL_15233083	Samut Prakan	unknown	Deceased	H69del	L24del			S373P		N969K	H655Y		V213G	G142D	A27S	Q954H	N501Y	P25del	T19I		N679K			Y505H			D796Y	S371F	T478K			F486V		T376A			G339D	P681H			S375F	Q498R		S477N	D405N		E484A	P26del
221	EPI_ISL_15233094	Samut Prakan	Female	Deceased	H69del	L24del			S373P		N969K	H655Y		V213G	G142D	A27S	Q954H	N501Y	P25del	T19I	N440K	N679K	N764K		Y505H			D796Y	S371F	T478K		K417N	F486V		T376A	R408S		G339D	P681H			S375F	Q498R		S477N	D405N		E484A	P26del
222	EPI_ISL_15233138	Samut Prakan	Female	Deceased	H69del	L24del			S373P		N969K	H655Y		V213G	G142D	A27S	Q954H	N501Y	P25del	T19I		N679K	N764K		Y505H			D796Y	S371F	T478K			F486V		T376A	R408S		G339D	P681H			S375F	Q498R		S477N	D405N		E484A	P26del
223	EPI_ISL_15233144	Chon Buri	Female	Deceased	H69del	L24del			S373P		N969K	H655Y		V213G	G142D	A27S	Q954H	N501Y	P25del	T19I		N679K			Y505H			D796Y		T478K			F486V					G339D	P681H				Q498R		S477N			E484A	P26del
224	EPI_ISL_15233156	Chon Buri	Male	Deceased	H69del	L24del			S373P		N969K	H655Y		V213G	G142D	A27S	Q954H	N501Y	P25del	T19I	N440K	N679K	N764K		Y505H			D796Y	S371F	T478K		K417N	F486V		T376A	R408S		G339D	P681H			S375F	Q498R		S477N	D405N		E484A	P26del
225	EPI_ISL_15233164	Samut Prakan	unknown	Deceased	H69del	L24del			S373P		N969K	H655Y		V213G	G142D	A27S	Q954H	N501Y	P25del	T19I	N440K	N679K	N764K		Y505H			D796Y	S371F	T478K		K417N	F486V		T376A	R408S		G339D	P681H			S375F	Q498R		S477N	D405N		E484A	P26del
226	EPI_ISL_15233215	Chon Buri	Female	Deceased	H69del	L24del			S373P		N969K	H655Y		V213G	G142D	A27S	Q954H	N501Y	P25del	T19I	N440K	N679K	N764K		Y505H			D796Y	S371F	T478K		K417N	F486V		T376A	R408S		G339D	P681H			S375F	Q498R		S477N	D405N		E484A	P26del
227	EPI_ISL_15833476	Bangkok	Female	Live		L24del			S373P	Q493R	N969K	H655Y		V213G	G142D	A27S	Q954H	N501Y	P25del	T19I		N679K	N764K		Y505H			D796Y	S371F	T478K		K417N			T376A	R408S		G339D	P681H			S375F	Q498R		S477N	D405N		E484A	P26del
228	EPI_ISL_16355925	Bangkok	Female	Hospitalized		L24del			S373P	Q493R	N969K	H655Y		V213G	G142D	A27S	Q954H	N501Y	P25del	T19I	N440K	N679K	N764K		Y505H			D796Y	S371F	T478K		K417N			T376A	R408S		G339D	P681H			S375F	Q498R		S477N	D405N		E484A
229	EPI_ISL_17770462	Bangkok	Male	Released		L24del			S373P	Q493R	N969K	H655Y		V213G	G142D	A27S	Q954H	N501Y	P25del	T19I	N440K	N679K	N764K		Y505H			D796Y	S371F	T478K		K417N			T376A	R408S		G339D	P681H			S375F	Q498R		S477N	D405N		E484A	P26del
230	EPI_ISL_17770463	Bangkok	Male	Released		L24del			S373P	Q493R	N969K	H655Y		V213G	G142D	A27S	Q954H	N501Y	P25del	T19I	N440K	N679K	N764K		Y505H			D796Y	S371F	T478K		K417N			T376A	R408S		G339D	P681H			S375F	Q498R		S477N	D405N		E484A	P26del
231	EPI_ISL_17770465	Bangkok	unknown	Released	H69del		T95I	A67V	S373P	Q493R	N969K	H655Y	N856K		G142D		Q954H	N501Y			N440K	N679K	N764K	L212I	Y505H	R346K	T547K	D796Y		T478K	V143del	K417N		G496S			S371L	G339D	P681H	Y144del	ins214EPE	S375F	Q498R	G446S	S477N		N211del	E484A
232	EPI_ISL_17770466	Bangkok	Male	Released		L24del			S373P	Q493R	N969K	H655Y		V213G	G142D	A27S	Q954H	N501Y	P25del	T19I	N440K	N679K	N764K		Y505H			D796Y	S371F	T478K		K417N			T376A	R408S		G339D	P681H			S375F	Q498R		S477N	D405N		E484A	P26del
233	EPI_ISL_17770467	Bangkok	unknown	Released		L24del			S373P	Q493R	N969K	H655Y		V213G	G142D	A27S	Q954H	N501Y	P25del	T19I	N440K	N679K	N764K		Y505H			D796Y	S371F	T478K		K417N			T376A	R408S		G339D	P681H			S375F	Q498R		S477N	D405N		E484A	P26del
234	EPI_ISL_17770468	Bangkok	unknown	Released	H69del		T95I	A67V	S373P	Q493R	N969K	H655Y	N856K		G142D		Q954H	N501Y			N440K	N679K	N764K	L212I	Y505H		T547K	D796Y		T478K	V143del	K417N		G496S			S371L	G339D	P681H	Y144del	ins214EPE	S375F	Q498R	G446S	S477N		N211del	E484A
235	EPI_ISL_17776299	Bangkok	unknown	Released	H69del		T95I	A67V	S373P	Q493R	N969K	H655Y	N856K		G142D		Q954H	N501Y			N440K	N679K	N764K	L212I	Y505H	R346K	T547K	D796Y		T478K	V143del	K417N		G496S			S371L	G339D	P681H	Y144del	ins214EPE	S375F	Q498R	G446S	S477N		N211del	E484A
236	EPI_ISL_17776603	Bangkok	unknown	Released		L24del			S373P	Q493R	N969K	H655Y		V213G	G142D	A27S	Q954H	N501Y	P25del	T19I	N440K	N679K	N764K		Y505H			D796Y	S371F	T478K		K417N			T376A	R408S		G339D	P681H			S375F	Q498R		S477N	D405N		E484A	P26del
237	EPI_ISL_17776604	Bangkok	unknown	Released		L24del			S373P	Q493R	N969K	H655Y		V213G	G142D	A27S	Q954H	N501Y	P25del	T19I	N440K	N679K	N764K		Y505H			D796Y	S371F	T478K		K417N			T376A	R408S		G339D	P681H			S375F	Q498R		S477N	D405N		E484A	P26del
238	EPI_ISL_17776605	Bangkok	unknown	Released		L24del			S373P	Q493R	N969K	H655Y		V213G	G142D	A27S	Q954H	N501Y	P25del	T19I	N440K	N679K	N764K		Y505H			D796Y	S371F	T478K		K417N			T376A	R408S		G339D	P681H			S375F	Q498R		S477N	D405N		E484A	P26del
239	EPI_ISL_17778770	Bangkok	unknown	Released		L24del			S373P	Q493R	N969K	H655Y		V213G	G142D	A27S	Q954H	N501Y	P25del	T19I	N440K	N679K	N764K		Y505H			D796Y	S371F	T478K		K417N			T376A	R408S		G339D	P681H			S375F	Q498R		S477N	D405N		E484A	P26del
240	EPI_ISL_17778771	Bangkok	unknown	Released		L24del			S373P	Q493R	N969K	H655Y		V213G	G142D	A27S	Q954H	N501Y	P25del	T19I	N440K	N679K	N764K		Y505H			D796Y	S371F	T478K		K417N			T376A	R408S		G339D	P681H			S375F	Q498R		S477N	D405N		E484A	P26del
241	EPI_ISL_17779272	Bangkok	unknown	Released		L24del			S373P	Q493R	N969K	H655Y		V213G	G142D	A27S	Q954H	N501Y	P25del	T19I	N440K	N679K	N764K		Y505H			D796Y	S371F	T478K		K417N			T376A	R408S		G339D	P681H			S375F	Q498R		S477N	D405N		E484A	P26del
242	EPI_ISL_17779273	Bangkok	unknown	Released		L24del			S373P	Q493R	N969K	H655Y		V213G	G142D	A27S	Q954H	N501Y	P25del	T19I	N440K	N679K	N764K		Y505H			D796Y	S371F	T478K		K417N			T376A	R408S		G339D	P681H			S375F	Q498R		S477N	D405N		E484A	P26del
243	EPI_ISL_17779913	Bangkok	unknown	Released		L24del			S373P	Q493R	N969K	H655Y		V213G	G142D	A27S	Q954H	N501Y	P25del	T19I	N440K	N679K	N764K		Y505H			D796Y	S371F	T478K		K417N			T376A	R408S		G339D	P681H			S375F	Q498R		S477N	D405N		E484A	P26del
244	EPI_ISL_17779914	Bangkok	unknown	Released	H69del		T95I	A67V	S373P	Q493R	N969K	H655Y	N856K		G142D		Q954H	N501Y			N440K	N679K	N764K	L212I	Y505H	R346K	T547K	D796Y		T478K	V143del	K417N		G496S			S371L	G339D	P681H	Y144del	ins214EPE	S375F	Q498R	G446S	S477N		N211del	E484A
245	EPI_ISL_17779915	Bangkok	unknown	Released		L24del			S373P	Q493R	N969K	H655Y		V213G	G142D	A27S	Q954H	N501Y	P25del	T19I	N440K	N679K	N764K		Y505H			D796Y	S371F	T478K		K417N			T376A	R408S		G339D	P681H			S375F	Q498R		S477N	D405N		E484A	P26del
246	EPI_ISL_17779916	Bangkok	unknown	Released	H69del		T95I	A67V	S373P	Q493R	N969K	H655Y	N856K		G142D		Q954H	N501Y			N440K	N679K	N764K	L212I	Y505H	R346K	T547K	D796Y		T478K	V143del	K417N		G496S			S371L	G339D	P681H	Y144del	ins214EPE	S375F	Q498R	G446S	S477N		N211del	E484A
247	EPI_ISL_17779940	Bangkok	unknown	Released		L24del			S373P	Q493R	N969K	H655Y		V213G	G142D	A27S	Q954H	N501Y	P25del	T19I	N440K	N679K	N764K		Y505H			D796Y	S371F	T478K		K417N			T376A	R408S		G339D	P681H			S375F	Q498R		S477N	D405N		E484A	P26del
248	EPI_ISL_17779941	Bangkok	unknown	Released		L24del			S373P	Q493R	N969K	H655Y		V213G	G142D	A27S	Q954H	N501Y	P25del	T19I	N440K	N679K	N764K		Y505H			D796Y	S371F	T478K		K417N			T376A	R408S		G339D	P681H			S375F	Q498R		S477N	D405N		E484A	P26del
249	EPI_ISL_17779942	Bangkok	unknown	Released		L24del			S373P	Q493R	N969K	H655Y		V213G	G142D	A27S	Q954H	N501Y	P25del	T19I	N440K	N679K	N764K		Y505H			D796Y	S371F	T478K		K417N			T376A	R408S		G339D	P681H			S375F	Q498R		S477N	D405N		E484A	P26del
250	EPI_ISL_17779943	Bangkok	unknown	Released		L24del			S373P	Q493R	N969K	H655Y		V213G	G142D	A27S	Q954H	N501Y	P25del	T19I	N440K	N679K	N764K		Y505H			D796Y	S371F	T478K		K417N			T376A	R408S		G339D	P681H			S375F	Q498R		S477N	D405N		E484A	P26del
251	EPI_ISL_17779944	Bangkok	unknown	Released		L24del			S373P	Q493R	N969K	H655Y		V213G	G142D	A27S	Q954H	N501Y	P25del	T19I	N440K	N679K	N764K		Y505H			D796Y	S371F	T478K		K417N			T376A	R408S		G339D	P681H			S375F	Q498R		S477N	D405N		E484A	P26del
252	EPI_ISL_17779948	Bangkok	unknown	Released		L24del			S373P	Q493R	N969K	H655Y		V213G	G142D	A27S	Q954H	N501Y	P25del	T19I	N440K	N679K	N764K		Y505H			D796Y	S371F	T478K		K417N			T376A	R408S		G339D	P681H			S375F	Q498R		S477N	D405N		E484A	P26del
253	EPI_ISL_17779949	Bangkok	unknown	Released	H69del		T95I	A67V	S373P	Q493R	N969K	H655Y	N856K		G142D		Q954H		N501Y		N440K	N679K	N764K	L212I	Y505H	R346K	T547K	D796Y		T478K	V143del	K417N		G496S			S371L	G339D	P681H	Y144del	ins214EPE	S375F	Q498R	G446S	S477N		N211del	E484A
254	EPI_ISL_17779950	Bangkok	unknown	Released		L24del			S373P	Q493R	N969K	H655Y		V213G	G142D	A27S	Q954H	N501Y	P25del	T19I	N440K	N679K	N764K		Y505H			D796Y	S371F	T478K		K417N			T376A	R408S		G339D	P681H			S375F	Q498R		S477N	D405N		E484A	P26del
255	EPI_ISL_17779951	Bangkok	unknown	Released		L24del			S373P	Q493R	N969K	H655Y		V213G	G142D	A27S	Q954H	N501Y	P25del	T19I	N440K	N679K	N764K		Y505H			D796Y	S371F	T478K		K417N			T376A	R408S		G339D	P681H			S375F	Q498R		S477N	D405N		E484A	P26del
256	EPI_ISL_17779952	Bangkok	unknown	Released		L24del			S373P	Q493R	N969K	H655Y		V213G	G142D	A27S	Q954H	N501Y	P25del	T19I	N440K	N679K	N764K		Y505H			D796Y	S371F	T478K		K417N			T376A	R408S		G339D	P681H			S375F	Q498R		S477N	D405N		E484A	P26del
257	EPI_ISL_17779953	Bangkok	unknown	Released		L24del			S373P	Q493R	N969K	H655Y		V213G	G142D	A27S	Q954H	N501Y	P25del	T19I	N440K	N679K	N764K		Y505H			D796Y	S371F	T478K		K417N			T376A	R408S		G339D	P681H			S375F	Q498R		S477N	D405N		E484A	P26del
258	EPI_ISL_17779954	Bangkok	unknown	Released	H69del	L24del			S373P		N969K	H655Y		V213G	G142D	A27S	Q954H	N501Y	P25del	T19I	N440K	N679K	N764K		Y505H			D796Y	S371F	T478K		K417N	F486V		T376A	R408S		G339D	P681H			S375F	Q498R		S477N	D405N		E484A	P26del
259	EPI_ISL_17779955	Bangkok	unknown	Released	H69del	L24del			S373P		N969K	H655Y		V213G	G142D	A27S	Q954H	N501Y	P25del	T19I	N440K	N679K	N764K		Y505H			D796Y	S371F	T478K		K417N	F486V		T376A	R408S		G339D	P681H			S375F	Q498R		S477N	D405N		E484A	P26del
260	EPI_ISL_17779956	Bangkok	unknown	Released		L24del			S373P		N969K	H655Y		V213G	G142D	A27S	Q954H	N501Y	P25del	T19I	N440K	N679K	N764K		Y505H			D796Y	S371F	T478K		K417N	F486V		T376A	R408S		G339D	P681H			S375F	Q498R		S477N	D405N		E484A	P26del
261	EPI_ISL_17779957	Bangkok	unknown	Released	H69del	L24del			S373P	Q493R	N969K	H655Y		V213G	G142D	A27S	Q954H	N501Y	P25del	T19I	N440K	N679K	N764K		Y505H			D796Y	S371F	T478K		K417N			T376A	R408S		G339D	P681H			S375F	Q498R		S477N	D405N		E484A	P26del
262	EPI_ISL_17779958	Bangkok	unknown	Released	H69del	L24del			S373P		N969K	H655Y		V213G	G142D	A27S	Q954H	N501Y	P25del	T19I	N440K	N679K	N764K		Y505H			D796Y	S371F	T478K		K417N	F486V		T376A	R408S		G339D	P681H			S375F	Q498R		S477N	D405N		E484A	P26del
263	EPI_ISL_17779959	Bangkok	unknown	Released	H69del	L24del			S373P		N969K	H655Y		V213G	G142D	A27S	Q954H	N501Y	P25del	T19I	N440K	N679K	N764K		Y505H			D796Y	S371F	T478K		K417N	F486V		T376A	R408S		G339D	P681H			S375F	Q498R		S477N	D405N		E484A	P26del
264	EPI_ISL_17779960	Bangkok	unknown	Released	H69del	L24del			S373P		N969K	H655Y		V213G	G142D	A27S	Q954H	N501Y	P25del	T19I	N440K	N679K	N764K		Y505H			D796Y	S371F	T478K		K417N	F486V		T376A	R408S		G339D	P681H			S375F	Q498R		S477N	D405N		E484A	P26del
265	EPI_ISL_17779961	Bangkok	unknown	Released	H69del	L24del			S373P		N969K	H655Y		V213G	G142D	A27S	Q954H	N501Y	P25del	T19I	N440K	N679K	N764K		Y505H			D796Y	S371F	T478K		K417N	F486V		T376A	R408S		G339D	P681H			S375F	Q498R		S477N	D405N		E484A	P26del
266	EPI_ISL_17779962	Bangkok	unknown	Released	H69del	L24del			S373P		N969K	H655Y		V213G	G142D	A27S	Q954H	N501Y	P25del	T19I	N440K	N679K	N764K		Y505H			D796Y	S371F	T478K		K417N	F486V		T376A	R408S		G339D	P681H			S375F	Q498R		S477N	D405N		E484A	P26del
267	EPI_ISL_17779963	Bangkok	unknown	Released	H69del	L24del			S373P		N969K	H655Y		V213G	G142D	A27S	Q954H	N501Y	P25del	T19I	N440K	N679K	N764K		Y505H			D796Y	S371F	T478K		K417N	F486V		T376A	R408S		G339D	P681H			S375F	Q498R		S477N	D405N		E484A	P26del
268	EPI_ISL_17779964	Bangkok	unknown	Released	H69del	L24del			S373P		N969K	H655Y		V213G	G142D	A27S	Q954H	N501Y	P25del	T19I	N440K	N679K	N764K		Y505H			D796Y	S371F	T478K		K417N	F486V		T376A	R408S		G339D	P681H			S375F	Q498R		S477N	D405N		E484A	P26del
269	EPI_ISL_17779965	Bangkok	unknown	Released	H69del	L24del			S373P		N969K	H655Y		V213G	G142D	A27S	Q954H	N501Y	P25del	T19I	N440K	N679K	N764K		Y505H			D796Y	S371F	T478K		K417N	F486V		T376A	R408S		G339D	P681H			S375F	Q498R		S477N	D405N		E484A	P26del
270	EPI_ISL_17779966	Bangkok	unknown	Released	H69del	L24del			S373P		N969K	H655Y		V213G	G142D	A27S	Q954H	N501Y	P25del	T19I	N440K	N679K			Y505H			D796Y	S371F	T478K		K417N	F486V		T376A	R408S		G339D	P681H			S375F	Q498R		S477N	D405N		E484A	P26del
271	EPI_ISL_17779967	Bangkok	unknown	Released	H69del	L24del			S373P		N969K	H655Y		V213G	G142D	A27S	Q954H	N501Y	P25del	T19I	N440K	N679K	N764K		Y505H			D796Y	S371F	T478K		K417N	F486V		T376A	R408S		G339D	P681H			S375F	Q498R		S477N	D405N		E484A	P26del
272	EPI_ISL_17779968	Bangkok	unknown	Released	H69del	L24del			S373P		N969K	H655Y		V213G	G142D	A27S	Q954H	N501Y	P25del	T19I	N440K	N679K	N764K		Y505H			D796Y	S371F	T478K		K417N	F486V		T376A	R408S		G339D	P681H			S375F	Q498R		S477N	D405N		E484A	P26del
273	EPI_ISL_17779969	Bangkok	unknown	Released	H69del	L24del			S373P		N969K	H655Y		V213G	G142D	A27S	Q954H	N501Y	P25del	T19I	N440K	N679K	N764K		Y505H			D796Y	S371F	T478K		K417N	F486V		T376A	R408S		G339D	P681H			S375F	Q498R		S477N	D405N		E484A	P26del
274	EPI_ISL_17779970	Bangkok	unknown	Released	H69del	L24del			S373P		N969K	H655Y		V213G	G142D	A27S	Q954H	N501Y	P25del	T19I	N440K	N679K	N764K		Y505H			D796Y	S371F	T478K		K417N	F486V		T376A	R408S		G339D	P681H			S375F	Q498R		S477N	D405N		E484A	P26del
275	EPI_ISL_17779971	Bangkok	Male	Released	H69del	L24del			S373P		N969K	H655Y		V213G	G142D	A27S	Q954H	N501Y	P25del	T19I	N440K	N679K	N764K		Y505H			D796Y	S371F	T478K		K417N	F486V		T376A	R408S		G339D	P681H			S375F	Q498R		S477N	D405N		E484A	P26del
276	EPI_ISL_17779972	Bangkok	Female	Released	H69del	L24del			S373P		N969K	H655Y		V213G	G142D	A27S	Q954H	N501Y	P25del	T19I	N440K	N679K	N764K		Y505H			D796Y	S371F	T478K		K417N	F486V		T376A	R408S		G339D	P681H			S375F	Q498R		S477N	D405N		E484A	P26del
277	EPI_ISL_17779973	Bangkok	unknown	Released	H69del	L24del			S373P		N969K	H655Y		V213G	G142D	A27S	Q954H	N501Y	P25del	T19I	N440K	N679K	N764K		Y505H			D796Y	S371F	T478K		K417N	F486V		T376A	R408S		G339D	P681H			S375F	Q498R		S477N	D405N		E484A	P26del
278	EPI_ISL_17779974	Bangkok	Female	Released	H69del	L24del			S373P		N969K	H655Y		V213G	G142D	A27S	Q954H	N501Y	P25del	T19I	N440K	N679K	N764K		Y505H			D796Y	S371F	T478K		K417N	F486V		T376A	R408S		G339D	P681H			S375F	Q498R		S477N	D405N		E484A	P26del
279	EPI_ISL_17779975	Bangkok	Female	Released	H69del	L24del			S373P		N969K	H655Y		V213G	G142D	A27S	Q954H	N501Y	P25del	T19I	N440K	N679K	N764K		Y505H			D796Y	S371F	T478K		K417N	F486V		T376A	R408S		G339D	P681H			S375F	Q498R		S477N	D405N		E484A	P26del
280	EPI_ISL_17779976	Bangkok	Male	Released	H69del	L24del			S373P		N969K	H655Y		V213G	G142D	A27S	Q954H	N501Y	P25del	T19I	N440K	N679K	N764K		Y505H			D796Y	S371F	T478K		K417N	F486V		T376A	R408S		G339D	P681H			S375F	Q498R		S477N	D405N		E484A	P26del
281	EPI_ISL_7226262	Bangkok / Bangrak	Male	Hospitalized	H69del		T95I	A67V	S373P	Q493R		H655Y			G142D			N501Y			N440K	N679K		L212I	Y505H		T547K			T478K	V143del	K417N		G496S			S371L	G339D	P681H	Y144del	ins214EPE	S375F	Q498R	G446S	S477N		N211del	E484A
282	EPI_ISL_7398681	Bangkok / Nongkhaem	Female	Hospitalized	H69del		T95I	A67V		Q493R	N969K	H655Y	N856K		G142D		Q954H	N501Y				N679K	N764K	L212I	Y505H		T547K	D796Y		T478K	V143del			G496S				G339D	P681H	Y144del	ins214EPE		Q498R	G446S	S477N		N211del	E484A
283	EPI_ISL_7398758	Bangkok / Nongkhaem	Female	Hospitalized	H69del		T95I	A67V	S373P	Q493R	N969K	H655Y	N856K		G142D		Q954H	N501Y			N440K	N679K	N764K	L212I	Y505H		T547K	D796Y		T478K	V143del			G496S			S371L	G339D	P681H	Y144del	ins214EPE	S375F	Q498R	G446S	S477N		N211del	E484A
284	EPI_ISL_7747672	Bangkok / Bangplad	Male	Hospitalized	H69del		T95I	A67V	S373P	Q493R	N969K	H655Y	N856K		G142D		Q954H	N501Y			N440K	N679K	N764K	L212I	Y505H	R346K	T547K	D796Y		T478K	V143del	K417N		G496S			S371L	G339D	P681H	Y144del	ins214EPE	S375F	Q498R	G446S	S477N		N211del	E484A
285	EPI_ISL_7747673	Chon Buri / Sriracha	Male	Hospitalized	H69del		T95I	A67V	S373P	Q493R		H655Y			G142D			N501Y			N440K	N679K		L212I	Y505H		T547K			T478K	V143del	K417N		G496S			S371L	G339D	P681H	Y144del	ins214EPE	S375F	Q498R	G446S	S477N		N211del	E484A
286	EPI_ISL_7747674	Nonthaburi / Muang	Male	Hospitalized	H69del		T95I	A67V	S373P	Q493R	N969K	H655Y	N856K		G142D		Q954H	N501Y			N440K	N679K	N764K	L212I	Y505H		T547K	D796Y		T478K	V143del	K417N		G496S			S371L	G339D	P681H	Y144del	ins214EPE	S375F	Q498R	G446S	S477N		N211del	E484A
287	EPI_ISL_7747675	Bangkok / Suanluang	Male	Hospitalized	H69del		T95I	A67V			N969K	H655Y	N856K		G142D		Q954H					N679K	N764K	L212I			T547K	D796Y		T478K	V143del								P681H	Y144del							N211del
288	EPI_ISL_7747677	Bangkok	Male	Hospitalized	H69del		T95I	A67V		Q493R	N969K	H655Y	N856K		G142D		Q954H	N501Y				N679K	N764K	L212I	Y505H		T547K	D796Y		T478K	V143del			G496S				G339D	P681H	Y144del	ins214EPE		Q498R	G446S	S477N		N211del	E484A
289	EPI_ISL_7747678	Bangkok	Female	Hospitalized	H69del		T95I	A67V		Q493R	N969K	H655Y	N856K		G142D		Q954H	N501Y				N679K	N764K	L212I	Y505H		T547K	D796Y		T478K	V143del			G496S					P681H	Y144del	ins214EPE		Q498R	G446S	S477N		N211del	E484A
290	EPI_ISL_7747680	Bangkok	Female	Hospitalized	H69del		T95I	A67V	S373P	Q493R	N969K	H655Y	N856K		G142D		Q954H	N501Y			N440K	N679K	N764K	L212I	Y505H		T547K	D796Y		T478K	V143del	K417N		G496S			S371L	G339D	P681H	Y144del	ins214EPE	S375F	Q498R	G446S	S477N		N211del	E484A
291	EPI_ISL_9712645		Male	Asymptomatic		L24del			S373P	Q493R	N969K	H655Y		V213G	G142D	A27S	Q954H	N501Y	P25del	T19I	N440K	N679K	N764K		Y505H			D796Y	S371F	T478K		K417N			T376A	R408S		G339D	P681H			S375F	Q498R		S477N	D405N		E484A	P26del
292	EPI_ISL_9712646		Male	Asymptomatic		L24del			S373P	Q493R	N969K	H655Y		V213G	G142D	A27S	Q954H	N501Y	P25del	T19I	N440K	N679K	N764K		Y505H			D796Y	S371F	T478K		K417N			T376A	R408S		G339D	P681H			S375F	Q498R		S477N	D405N		E484A	P26del
[truncated: 59 more columns]

## Sheet: deta
No.	Accession ID	location	Gender	Patient status	95	142	688	681	158	157	19	950	156	1117	478	614	452	477	5	1207	522V	522	258	1150	81	1246	181	1	655	1237	369	614	1238	365	368	1234	11	654	1239	10	693	444	306	29	222	80	216	818	939
1	EPI_ISL_10239725	Bangkok	Female	Released	T95I	G142D	A688S	P681R	R158del	F157del	T19R	D950N	E156G	T1117I	T478K	D614G	L452R	S477I
2	EPI_ISL_10239726	Bangkok	Male	Released	T95I	G142D		P681R	R158del	F157del	T19R	D950N	E156G		T478K	D614G	L452R		L5F	E1207D
3	EPI_ISL_10239759	Bangkok	Female	Released	T95I	G142D		P681R	R158del	F157del	T19R	D950N	E156G		T478K	D614G	L452R
4	EPI_ISL_10239777	Bangkok	Female	Released		G142D		P681R	R158del	F157del	T19R	D950N	E156G		T478K	D614G	L452R
5	EPI_ISL_10239778	Bangkok	Male	Released		G142D		P681R	R158del	F157del	T19R	D950N	E156G		T478K	D614G	L452R
6	EPI_ISL_10240078	Bangkok	Male	Released	T95I	G142D		P681R	R158del	F157del	T19R	D950N	E156G		T478K	D614G	L452R					A522S
7	EPI_ISL_10240257	Bangkok	Female	Released	T95I	G142D		P681R	R158del	F157del	T19R	D950N	E156G		T478K	D614G	L452R
8	EPI_ISL_10240313	Bangkok	Female	Released	T95I	G142D		P681R	R158del	F157del	T19R	D950N	E156G		T478K	D614G	L452R
9	EPI_ISL_10240349	Bangkok	Female	Released		G142D		P681R	R158del	F157del	T19R	D950N	E156G		T478K	D614G	L452R
10	EPI_ISL_10240350	Bangkok	Male	Released		G142D		P681R		F157del	T19R	D950N	E156G		T478K	D614G	L452R						W258R	E1150D	N81D
11	EPI_ISL_10240581	Bangkok	Male	Released		G142D		P681R	R158del	F157del	T19R	D950N	E156G		T478K	D614G	L452R									G1246S
12	EPI_ISL_10240582	Bangkok	Male	Released	T95I	G142D		P681R	R158del	F157del	T19R	D950N	E156G		T478K	D614G	L452R										G181V
13	EPI_ISL_10282018	Bangkok	Female	Released	T95I	G142D		P681R	R158del	F157del	T19R	D950N	E156G		T478K	D614G	L452R
14	EPI_ISL_10282019	Bangkok	Male	Released	T95I	G142D		P681R	R158del	F157del	T19R	D950N	E156G		T478K	D614G	L452R
15	EPI_ISL_10282020	Bangkok	Female	Released	T95I	G142D		P681R	R158del	F157del	T19R	D950N	E156G		T478K	D614G	L452R
16	EPI_ISL_10282021	Bangkok	Male	Released	T95I	G142D		P681R	R158del	F157del	T19R	D950N	E156G		T478K	D614G	L452R
17	EPI_ISL_10282022	Bangkok	Female	Released	T95I	G142D		P681R	R158del	F157del	T19R	D950N	E156G		T478K	D614G	L452R
18	EPI_ISL_10282023	Bangkok	Male	Released		G142D		P681R	R158del	F157del	T19R	D950N	E156G		T478K	D614G	L452R
19	EPI_ISL_10968710	Lampang	Female	Hospitalized	T95I	G142D		P681R	R158del	F157del	T19R	D950N	E156G		T478K	D614G	L452R
20	EPI_ISL_4348472	Chai Nat	Female	Deceased							T19R	D950N			T478K		L452R											M1L	H655N	M1237S	Y369E	D614G	T1238S	Y365S	L368J	L1234F	V11L	E654G	S1239K	L10I
21	EPI_ISL_4348478	Songkhla	Male	Deceased				P681R			T19R				T478K		L452R															D614G									I693S
22	EPI_ISL_4635436	Narathiwat	unknown	Deceased				P681R							T478K		L452R															D614G										K444N
23	EPI_ISL_4636437	Narathiwat	Male	Death	T95I			P681R	R158del	F157del	T19R	D950B	E156G		T478K	D614G	L452R																										F306L
24	EPI_ISL_5052331	Nakhon Sawan	unknown	Death	T95I			P681R	R158del	F157del	T19R	D950B	E156G		T478K	D614G	L452R																											T29I
25	EPI_ISL_5052345	Narathiwat	Male	Death	T95I			P681R	R158del	F157del	T19R	D950B	E156G		T478K	D614G	L452R
26	EPI_ISL_5052348	Narathiwat	Female	Death				P681R	R158del	F157del	T19R	D950B	E156G		T478K	D614G	L452R																												A222V
27	EPI_ISL_5052349	Narathiwat	Female	Death	T95I			P681R	R158del	F157del	T19R	D950B	E156G		T478K	D614G	L452R
28	EPI_ISL_5052350	Narathiwat	Female	Death				P681R	R158del	F157del	T19R	D950B	E156G		T478K	D614G	L452R																												A222V
29	EPI_ISL_5052353	Narathiwat	Female	Death	T95I			P681R	R158del	F157del	T19R	D950B	E156G		T478K	D614G	L452R																										F306L
30	EPI_ISL_5052354	Narathiwat	Male	Death				P681R	R158del	F157del	T19R	D950B	E156G		T478K	D614G	L452R																												A222V
31	EPI_ISL_5052372	Narathiwat	Male	Death		G142D		P681R	R158del	F157del	T19R	D950B	E156G		T478K	D614G	L452R
32	EPI_ISL_5052373	Narathiwat	Female	Death		G142D		P681R		F157del		D950B	E156G		T478K	D614G	L452R																												A222V
33	EPI_ISL_5052374	Narathiwat	Female	Death		G142D		P681R	R158del	F157del	T19R	D950B	E156G		T478K	D614G	L452R																										F306L			D80A
34	EPI_ISL_5052376	Narathiwat	Male	Death							T19R				T478K	D614G	L452R
35	EPI_ISL_5052377	Narathiwat	Male	Death		G142D		P681R	R158del	F157del	T19R		E156G		T478K	D614G	L452R
36	EPI_ISL_5052425	Kanchanaburi	Male	Death	T95I			P681R	R158del	F157del	T19R	D950B	E156G		T478K	D614G	L452R																														L216F
37	EPI_ISL_5057862	Narathiwat	Male	Deceased				P681R	R158del	F157del	T19R	D950B	E156G		T478K	D614G	L452R																												A222V
38	EPI_ISL_5057867	Narathiwat	Female	Deceased				P681R			T19R				T478K	D614G	L452R
39	EPI_ISL_5057869	Narathiwat	Female	Deceased							T19R				T478K	D614G	L452R																															I818V
40	EPI_ISL_5416189	Narathiwat	Female	Death		G142D		P681R	R158del	F157del	T19R	D950B	E156G		T478K	D614G	L452R																												A222V
41	EPI_ISL_5416195	Narathiwat	Male	Death		G142D		P681R	R158del	F157del	T19R	D950B	E156G		T478K	D614G	L452R
42	EPI_ISL_5425827	Narathiwat	Male	Death	T95I			P681R	R158del	F157del	T19R	D950B	E156G		T478K	D614G	L452R
43	EPI_ISL_5446176	Narathiwat	Female	Deceased	T95I			P681R	R158del	F157del	T19R	D950B	E156G		T478K	D614G	L452R																										F306L
44	EPI_ISL_5446177	Narathiwat	Female	Deceased				P681R	R158del	F157del	T19R	D950B	E156G		T478K	D614G	L452R
45	EPI_ISL_5446179	Narathiwat	Female	Deceased	T95I	G142D		P681R	R158del	F157del	T19R	D950B	E156G		T478K	D614G	L452R
46	EPI_ISL_5643174	Chanthaburi	Male	Nasopharyngeal swab and Oropharyngeal swab	T95I	G142D		P681R	R158del	F157del	T19R	D950B	E156G		T478K	D614G	L452R
47	EPI_ISL_5643175	Chanthaburi	Female	Nasopharyngeal swab and Oropharyngeal swab	T95I	G142D		P681R	R158del	F157del	T19R	D950B	E156G		T478K	D614G	L452R																																S939F
48	EPI_ISL_5643176	Chanthaburi	Male	Nasopharyngeal swab and Oropharyngeal swab	T95I	G142D		P681R	R158del	F157del	T19R	D950B	E156G		T478K	D614G	L452R
49	EPI_ISL_5643177	Chanthaburi	Male	Nasopharyngeal swab and Oropharyngeal swab	T95I	G142D		P681R	R158del	F157del	T19R	D950B	E156G		T478K	D614G	L452R
50	EPI_ISL_5643178	Chanthaburi	Female	Nasopharyngeal swab and Oropharyngeal swab	T95I	G142D		P681R	R158del	F157del	T19R	D950B	E156G		T478K	D614G	L452R
51	EPI_ISL_5643179	Chanthaburi	Female	Nasopharyngeal swab and Oropharyngeal swab	T95I	G142D		P681R	R158del	F157del	T19R	D950B	E156G		T478K	D614G	L452R
52	EPI_ISL_5643180	Chanthaburi	Male	Nasopharyngeal swab and Oropharyngeal swab	T95I	G142D		P681R	R158del	F157del	T19R	D950B	E156G		T478K	D614G	L452R
53	EPI_ISL_5643181	Chanthaburi	Female	Nasopharyngeal swab and Oropharyngeal swab	T95I	G142D		P681R	R158del	F157del	T19R	D950B	E156G		T478K	D614G	L452R
54	EPI_ISL_5643182	Chanthaburi	Female	Nasopharyngeal swab and Oropharyngeal swab	T95I	G142D		P681R	R158del	F157del	T19R	D950B	E156G		T478K	D614G	L452R
55	EPI_ISL_5643183	Chanthaburi	Male	Nasopharyngeal swab and Oropharyngeal swab	T95I	G142D		P681R	R158del	F157del	T19R	D950B	E156G		T478K	D614G	L452R																																S939F
56	EPI_ISL_5643184	Chanthaburi	Male	Nasopharyngeal swab and Oropharyngeal swab		G142D		P681R	R158del	F157del	T19R	D950B	E156G		T478K	D614G	L452R
57	EPI_ISL_5643185	Chanthaburi	Male	Nasopharyngeal swab and Oropharyngeal swab	T95I	G142D		P681R	R158del	F157del	T19R	D950B	E156G		T478K	D614G	L452R
58	EPI_ISL_5643186	Chanthaburi	Male	Nasopharyngeal swab and Oropharyngeal swab	T95I	G142D		P681R	R158del	F157del	T19R	D950B	E156G		T478K	D614G	L452R
59	EPI_ISL_5643187	Chanthaburi	Male	Nasopharyngeal swab and Oropharyngeal swab	T95I	G142D		P681R	R158del	F157del	T19R	D950B	E156G		T478K	D614G	L452R
60	EPI_ISL_5643188	Chanthaburi	Female	Nasopharyngeal swab and Oropharyngeal swab	T95I	G142D		P681R	R158del	F157del	T19R	D950B	E156G		T478K	D614G	L452R
61	EPI_ISL_5643189	Chanthaburi	Male	Nasopharyngeal swab and Oropharyngeal swab	T95I	G142D		P681R	R158del	F157del	T19R	D950B	E156G		T478K	D614G	L452R
62	EPI_ISL_5643190	Chanthaburi	Male	Nasopharyngeal swab and Oropharyngeal swab	T95I	G142D		P681R	R158del	F157del	T19R	D950B	E156G		T478K	D614G	L452R
63	EPI_ISL_5643191	Chanthaburi	Male	Nasopharyngeal swab and Oropharyngeal swab	T95I	G142D		P681R	R158del	F157del	T19R	D950B	E156G		T478K	D614G	L452R
64	EPI_ISL_5643192	Chanthaburi	Female	Nasopharyngeal swab and Oropharyngeal swab	T95I	G142D		P681R	R158del	F157del	T19R	D950B	E156G		T478K	D614G	L452R
65	EPI_ISL_5643193	Chanthaburi	Male	Nasopharyngeal swab and Oropharyngeal swab	T95I	G142D		P681R	R158del	F157del	T19R	D950B	E156G		T478K	D614G	L452R
66	EPI_ISL_5643194	Chanthaburi	Male	Nasopharyngeal swab and Oropharyngeal swab	T95I	G142D		P681R	R158del	F157del	T19R	D950B	E156G		T478K	D614G	L452R
67	EPI_ISL_5643195	Chanthaburi	Female	Nasopharyngeal swab and Oropharyngeal swab	T95I	G142D		P681R	R158del	F157del	T19R	D950B	E156G		T478K	D614G	L452R
68	EPI_ISL_5643196	Chanthaburi	Female	Nasopharyngeal swab and Oropharyngeal swab	T95I	G142D		P681R	R158del	F157del	T19R	D950B	E156G		T478K	D614G	L452R
69	EPI_ISL_5643197	Chanthaburi	Female	Nasopharyngeal swab and Oropharyngeal swab	T95I	G142D		P681R	R158del	F157del	T19R	D950B	E156G		T478K	D614G	L452R
70	EPI_ISL_5643198	Chanthaburi	Female	Nasopharyngeal swab and Oropharyngeal swab	T95I	G142D		P681R	R158del	F157del	T19R	D950B	E156G		T478K	D614G	L452R
71	EPI_ISL_5643199	Chanthaburi	Male	Nasopharyngeal swab and Oropharyngeal swab	T95I	G142D		P681R	R158del	F157del	T19R	D950B	E156G		T478K	D614G	L452R
72	EPI_ISL_5643200	Chanthaburi	Male	Nasopharyngeal swab and Oropharyngeal swab	T95I	G142D		P681R	R158del	F157del	T19R	D950B	E156G		T478K	D614G	L452R
73	EPI_ISL_5643201	Chanthaburi	Female	Nasopharyngeal swab and Oropharyngeal swab	T95I	G142D		P681R	R158del	F157del	T19R	D950B	E156G		T478K	D614G	L452R
74	EPI_ISL_5643202	Chanthaburi	Male	Nasopharyngeal swab and Oropharyngeal swab	T95I	G142D		P681R	R158del	F157del	T19R	D950B	E156G		T478K	D614G	L452R
75	EPI_ISL_5643203	Chanthaburi	Female	Nasopharyngeal swab and Oropharyngeal swab	T95I	G142D		P681R	R158del	F157del	T19R	D950B	E156G		T478K	D614G	L452R
76	EPI_ISL_5643204	Chanthaburi	Male	Nasopharyngeal swab and Oropharyngeal swab	T95I	G142D		P681R	R158del	F157del	T19R	D950B	E156G		T478K	D614G	L452R
77	EPI_ISL_5643205	Chanthaburi	Male	Nasopharyngeal swab and Oropharyngeal swab	T95I	G142D		P681R	R158del	F157del	T19R	D950B	E156G		T478K	D614G	L452R
78	EPI_ISL_5643206	Chanthaburi	Male	Nasopharyngeal swab and Oropharyngeal swab	T95I	G142D		P681R	R158del	F157del	T19R	D950B	E156G		T478K	D614G	L452R
79	EPI_ISL_5643207	Chanthaburi	Female	Nasopharyngeal swab and Oropharyngeal swab	T95I	G142D		P681R	R158del	F157del	T19R	D950B	E156G		T478K	D614G	L452R
80	EPI_ISL_5643208	Chanthaburi	Female	Nasopharyngeal swab and Oropharyngeal swab	T95I	G142D		P681R	R158del	F157del	T19R	D950B	E156G		T478K	D614G	L452R																																S939F
81	EPI_ISL_5643209	Chanthaburi	Male	Nasopharyngeal swab and Oropharyngeal swab	T95I	G142D		P681R	R158del	F157del	T19R	D950B	E156G		T478K	D614G	L452R																																S939F
82	EPI_ISL_5643210	Chanthaburi	Male	Nasopharyngeal swab and Oropharyngeal swab	T95I	G142D		P681R	R158del	F157del	T19R	D950B	E156G		T478K	D614G	L452R
83	EPI_ISL_5643211	Chanthaburi	Female	Nasopharyngeal swab and Oropharyngeal swab	T95I	G142D		P681R	R158del	F157del	T19R	D950B	E156G		T478K	D614G	L452R
84	EPI_ISL_5643212	Chanthaburi	Male	Nasopharyngeal swab and Oropharyngeal swab	T95I	G142D		P681R	R158del	F157del	T19R	D950B	E156G		T478K	D614G	L452R																																S939F
85	EPI_ISL_5643213	Chanthaburi	Male	Nasopharyngeal swab and Oropharyngeal swab	T95I	G142D		P681R	R158del	F157del	T19R	D950B	E156G		T478K	D614G	L452R
86	EPI_ISL_5643214	Chanthaburi	Male	Nasopharyngeal swab and Oropharyngeal swab	T95I	G142D		P681R	R158del	F157del	T19R	D950B	E156G		T478K	D614G	L452R
87	EPI_ISL_5643215	Chanthaburi	Female	Nasopharyngeal swab and Oropharyngeal swab	T95I	G142D		P681R	R158del	F157del	T19R	D950B	E156G		T478K	D614G	L452R
88	EPI_ISL_5643216	Chanthaburi	Female	Nasopharyngeal swab and Oropharyngeal swab	T95I	G142D		P681R	R158del	F157del	T19R	D950B	E156G		T478K	D614G	L452R
89	EPI_ISL_5643217	Chanthaburi	Male	Nasopharyngeal swab and Oropharyngeal swab	T95I	G142D		P681R	R158del	F157del	T19R	D950B	E156G		T478K	D614G	L452R
90	EPI_ISL_5643218	Chanthaburi	Female	Nasopharyngeal swab and Oropharyngeal swab	T95I	G142D		P681R	R158del	F157del	T19R	D950B	E156G		T478K	D614G	L452R																																S939F
91	EPI_ISL_5643219	Chanthaburi	Male	Nasopharyngeal swab and Oropharyngeal swab	T95I	G142D		P681R	R158del	F157del	T19R	D950B	E156G		T478K	D614G	L452R
92	EPI_ISL_5643220	Chanthaburi	Female	Nasopharyngeal swab and Oropharyngeal swab	T95I	G142D		P681R	R158del	F157del	T19R	D950B	E156G		T478K	D614G	L452R
93	EPI_ISL_5643221	Chanthaburi	Male	Nasopharyngeal swab and Oropharyngeal swab	T95I	G142D		P681R	R158del	F157del	T19R	D950B	E156G		T478K	D614G	L452R																																S939F
94	EPI_ISL_5643222	Chanthaburi	Male	Nasopharyngeal swab and Oropharyngeal swab		G142D		P681R	R158del	F157del	T19R	D950B	E156G		T478K	D614G	L452R
95	EPI_ISL_5643223	Chanthaburi	Female	Nasopharyngeal swab and Oropharyngeal swab	T95I	G142D		P681R	R158del	F157del	T19R	D950B	E156G		T478K	D614G	L452R
96	EPI_ISL_5643224	Chanthaburi	Male	Nasopharyngeal swab and Oropharyngeal swab	T95I	G142D		P681R	R158del	F157del	T19R	D950B	E156G		T478K	D614G	L452R
97	EPI_ISL_5643225	Chanthaburi	Male	Nasopharyngeal swab and Oropharyngeal swab		G142D		P681R	R158del	F157del	T19R	D950B	E156G		T478K	D614G	L452R
98	EPI_ISL_5643226	Chanthaburi	Male	Nasopharyngeal swab and Oropharyngeal swab	T95I	G142D		P681R	R158del	F157del	T19R	D950B	E156G		T478K	D614G	L452R
99	EPI_ISL_5643227	Chanthaburi	Male	Nasopharyngeal swab and Oropharyngeal swab	T95I	G142D		P681R	R158del	F157del	T19R	D950B	E156G		T478K	D614G	L452R
100	EPI_ISL_5643228	Chanthaburi	Female	Nasopharyngeal swab and Oropharyngeal swab	T95I	G142D		P681R	R158del	F157del	T19R	D950B	E156G		T478K	D614G	L452R
101	EPI_ISL_5643229	Chanthaburi	Female	Nasopharyngeal swab and Oropharyngeal swab	T95I	G142D		P681R	R158del	F157del	T19R	D950B	E156G		T478K	D614G	L452R
102	EPI_ISL_5643230	Chanthaburi	Female	Nasopharyngeal swab and Oropharyngeal swab	T95I	G142D		P681R	R158del	F157del	T19R	D950B	E156G		T478K	D614G	L452R
103	EPI_ISL_5643231	Chanthaburi	Male	Nasopharyngeal swab and Oropharyngeal swab	T95I	G142D		P681R	R158del	F157del	T19R	D950B	E156G		T478K	D614G	L452R
104	EPI_ISL_5643232	Chanthaburi	Female	Nasopharyngeal swab and Oropharyngeal swab	T95I	G142D		P681R	R158del	F157del	T19R	D950B	E156G		T478K	D614G	L452R
105	EPI_ISL_5643233	Chanthaburi	Male	Nasopharyngeal swab and Oropharyngeal swab	T95I	G142D		P681R	R158del	F157del	T19R	D950B	E156G		T478K	D614G	L452R
106	EPI_ISL_5643234	Chanthaburi	Female	Nasopharyngeal swab and Oropharyngeal swab	T95I	G142D		P681R	R158del	F157del	T19R	D950B	E156G		T478K	D614G	L452R
107	EPI_ISL_5643235	Chanthaburi	Male	Nasopharyngeal swab and Oropharyngeal swab	T95I	G142D		P681R	R158del	F157del	T19R	D950B	E156G		T478K	D614G	L452R
108	EPI_ISL_5643236	Chanthaburi	Male	Nasopharyngeal swab and Oropharyngeal swab	T95I	G142D		P681R	R158del	F157del	T19R	D950B	E156G		T478K	D614G	L452R
109	EPI_ISL_5643237	Chanthaburi	Female	Nasopharyngeal swab and Oropharyngeal swab	T95I	G142D		P681R	R158del	F157del	T19R	D950B	E156G		T478K	D614G	L452R
110	EPI_ISL_5643238	Chanthaburi	Female	Nasopharyngeal swab and Oropharyngeal swab	T95I	G142D		P681R	R158del	F157del	T19R	D950B	E156G		T478K	D614G	L452R
111	EPI_ISL_5643239	Chanthaburi	Male	Nasopharyngeal swab and Oropharyngeal swab	T95I	G142D		P681R	R158del	F157del	T19R	D950B	E156G		T478K	D614G	L452R
112	EPI_ISL_5643240	Chanthaburi	Male	Nasopharyngeal swab and Oropharyngeal swab	T95I	G142D		P681R	R158del	F157del	T19R	D950B	E156G		T478K	D614G	L452R
113	EPI_ISL_5643241	Chanthaburi	Female	Nasopharyngeal swab and Oropharyngeal swab	T95I	G142D		P681R	R158del	F157del	T19R	D950B	E156G		T478K	D614G	L452R
114	EPI_ISL_5643242	Chanthaburi	Male	Nasopharyngeal swab and Oropharyngeal swab	T95I	G142D		P681R	R158del	F157del	T19R	D950B	E156G		T478K	D614G	L452R
115	EPI_ISL_5643243	Chanthaburi	Female	Nasopharyngeal swab and Oropharyngeal swab		G142D		P681R	R158del	F157del	T19R	D950B	E156G		T478K	D614G	L452R
116	EPI_ISL_5643244	Chanthaburi	Female	Nasopharyngeal swab and Oropharyngeal swab	T95I	G142D		P681R	R158del	F157del	T19R	D950B	E156G		T478K	D614G	L452R																																S939F
117	EPI_ISL_5643245	Chanthaburi	Female	Nasopharyngeal swab and Oropharyngeal swab		G142D		P681R	R158del	F157del	T19R	D950B	E156G		T478K	D614G	L452R
118	EPI_ISL_5643246	Chanthaburi	Male	Nasopharyngeal swab and Oropharyngeal swab		G142D		P681R	R158del	F157del	T19R	D950B	E156G		T478K	D614G	L452R
119	EPI_ISL_5643247	Chanthaburi	Female	Nasopharyngeal swab and Oropharyngeal swab		G142D		P681R	R158del	F157del	T19R	D950B	E156G		T478K	D614G	L452R
120	EPI_ISL_5643248	Chanthaburi	Female	Nasopharyngeal swab and Oropharyngeal swab		G142D		P681R	R158del	F157del	T19R	D950B	E156G		T478K	D614G	L452R
121	EPI_ISL_5643249	Chanthaburi	Female	Nasopharyngeal swab and Oropharyngeal swab		G142D		P681R	R158del	F157del	T19R	D950B	E156G		T478K	D614G	L452R
122	EPI_ISL_5643250	Chanthaburi	Female	Nasopharyngeal swab and Oropharyngeal swab		G142D		P681R	R158del	F157del	T19R	D950B	E156G		T478K	D614G	L452R
123	EPI_ISL_5643251	Chanthaburi	Male	Nasopharyngeal swab and Oropharyngeal swab	T95I	G142D		P681R	R158del	F157del	T19R	D950B	E156G		T478K	D614G	L452R
124	EPI_ISL_5643252	Chanthaburi	Male	Nasopharyngeal swab and Oropharyngeal swab	T95I	G142D		P681R	R158del	F157del	T19R	D950B	E156G		T478K	D614G	L452R																																S939F
125	EPI_ISL_5643253	Chanthaburi	Male	Nasopharyngeal swab and Oropharyngeal swab	T95I	G142D		P681R	R158del	F157del	T19R	D950B	E156G		T478K	D614G	L452R																																S939F
126	EPI_ISL_5643254	Chanthaburi	Male	Nasopharyngeal swab and Oropharyngeal swab	T95I	G142D		P681R	R158del	F157del	T19R	D950B	E156G		T478K	D614G	L452R
127	EPI_ISL_5695366	Chanthaburi	Male	Nasopharyngeal swab and Oropharyngeal swab	T95I	G142D		P681R	R158del	F157del	T19R	D950B	E156G		T478K	D614G	L452R																																S939F
128	EPI_ISL_5879592	Bangkok	Female	Released	T95I	G142D		P681R	R158del	F157del	T19R	D950B	E156G		T478K	D614G	L452R
129	EPI_ISL_5879597	Bangkok	Male	Released		G142D		P681R	R158del	F157del	T19R	D950B	E156G		T478K	D614G	L452R
130	EPI_ISL_5879598	Bangkok	Female	Released		G142D		P681R	R158del	F157del	T19R	D950B	E156G		T478K	D614G	L452R
131	EPI_ISL_5879600	Bangkok	Male	Released		G142D		P681R	R158del	F157del	T19R	D950B	E156G		T478K	D614G	L452R
132	EPI_ISL_5879601	Bangkok	Female	Released		G142D		P681R	R158del	F157del	T19R	D950B	E156G		T478K	D614G	L452R
133	EPI_ISL_5879614	Bangkok	Female	Released	T95I	G142D		P681R	R158del	F157del	T19R	D950B	E156G		T478K	D614G	L452R
134	EPI_ISL_5879615	Bangkok	Female	Released		G142D		P681R	R158del	F157del	T19R	D950B	E156G		T478K	D614G	L452R
135	EPI_ISL_5879623	Bangkok	Male	Released		G142D		P681R	R158del	F157del	T19R	D950B	E156G		T478K	D614G	L452R
136	EPI_ISL_5879633	Bangkok	Male	Released		G142D		P681R	R158del	F157del	T19R	D950B	E156G		T478K	D614G	L452R
137	EPI_ISL_5879635	Bangkok	Male	Released		G142D		P681R	R158del	F157del	T19R	D950B	E156G		T478K	D614G	L452R
138	EPI_ISL_5879729	Bangkok	Male	Released	T95I	G142D		P681R	R158del	F157del	T19R	D950B	E156G		T478K	D614G	L452R
139	EPI_ISL_5879819	Bangkok	Female	Released	T95I	G142D		P681R	R158del	F157del	T19R	D950B	E156G		T478K	D614G	L452R
140	EPI_ISL_5879823	Bangkok	Male	Released		G142D		P681R	R158del	F157del	T19R	D950B	E156G		T478K	D614G	L452R
141	EPI_ISL_5879824	Bangkok	Female	Released		G142D		P681R	R158del	F157del	T19R	D950B	E156G		T478K	D614G	L452R
142	EPI_ISL_5879908	Bangkok	Female	Released	T95I	G142D		P681R	R158del	F157del	T19R	D950B	E156G		T478K	D614G	L452R
143	EPI_ISL_5879918	Bangkok	Male	Released		G142D		P681R	R158del	F157del	T19R	D950B	E156G		T478K	D614G	L452R
144	EPI_ISL_5879921	Bangkok	Male	Released	T95I	G142D		P681R	R158del	F157del	T19R	D950B	E156G		T478K	D614G	L452R
145	EPI_ISL_5879923	Bangkok	Male	Released		G142D		P681R	R158del	F157del	T19R	D950B	E156G		T478K	D614G	L452R
146	EPI_ISL_5880076	Bangkok	Female	Released	T95I	G142D		P681R	R158del	F157del	T19R	D950B	E156G		T478K	D614G	L452R
147	EPI_ISL_5880288	Bangkok	Male	Released		G142D		P681R	R158del	F157del	T19R	D950B	E156G		T478K	D614G	L452R
148	EPI_ISL_5880433	Bangkok	Female	Released	T95I	G142D		P681R	R158del	F157del	T19R	D950B	E156G		T478K	D614G	L452R
149	EPI_ISL_5880434	Bangkok	Male	Released	T95I	G142D		P681R	R158del	F157del	T19R	D950B	E156G		T478K	D614G	L452R
150	EPI_ISL_5880497	Bangkok	Male	Released	T95I	G142D		P681R	R158del	F157del	T19R	D950B	E156G		T478K	D614G	L452R
151	EPI_ISL_6036300	Narathiwat	unknown	Deceased	T95I			P681R	R158del	F157del	T19R	D950B	E156G		T478K	D614G	L452R
152	EPI_ISL_6036306	Narathiwat	Female	Deceased	T95I			P681R	R158del	F157del	T19R	D950B	E156G		T478K	D614G	L452R
153	EPI_ISL_6036311	Narathiwat	unknown	Deceased	T95I	G142D		P681R	R158del	F157del	T19R	D950B	E156G		T478K	D614G	L452R
154	EPI_ISL_6036320	Songkhla	unknown	Hospitalized				P681R	R158del	F157del	T19R	D950B	E156G		T478K	D614G	L452R
155	EPI_ISL_6036322	Narathiwat	Female	Hospitalized				P681R	R158del	F157del	T19R	D950B	E156G		T478K	D614G	L452R																												A222V
156	EPI_ISL_6036325	Narathiwat	unknown	Deceased	T95I			P681R	R158del	F157del	T19R	D950B	E156G		T478K	D614G	L452R
157	EPI_ISL_6036340	Songkhla	Female	Hospitalized				P681R	R158del	F157del	T19R	D950B	E156G		T478K	D614G	L452R
158	EPI_ISL_6036358	Narathiwat	unknown	Deceased	T95I			P681R	R158del	F157del	T19R	D950B	E156G		T478K	D614G	L452R																										F306L
159	EPI_ISL_6036367	Narathiwat	unknown	Deceased	T95I			P681R	R158del	F157del	T19R	D950B	E156G		T478K	D614G	L452R		L5F																								F306L
160	EPI_ISL_6036449	Songkhla	Female	Deceased				P681R	R158del	F157del	T19R	D950B	E156G		T478K	D614G	L452R																												A222V
161	EPI_ISL_6036455	Songkhla	Female	Deceased	T95I			P681R	R158del	F157del	T19R	D950B	E156G		T478K	D614G	L452R																										F306L
162	EPI_ISL_6036480	Songkhla	unknown	Deceased				P681R	R158del	F157del	T19R	D950B	E156G		T478K	D614G	L452R																												A222V
163	EPI_ISL_6036486	Songkhla	unknown	Deceased	T95I			P681R	R158del	F157del	T19R	D950B	E156G		T478K	D614G	L452R																										F306L
164	EPI_ISL_6036556	Songkhla	Female	Hospitalized				P681R	R158del	F157del	T19R	D950B	E156G		T478K	D614G	L452R
165	EPI_ISL_6036574	Songkhla	Male	Deceased				P681R			T19R	D950B			T478K	D614G	L452R																												A222V
166	EPI_ISL_6036600	Narathiwat	Female	Deceased				P681R	R158del	F157del	T19R	D950B	E156G		T478K	D614G	L452R
167	EPI_ISL_6036608	Songkhla	unknown	Deceased				P681R	R158del	F157del	T19R	D950B	E156G		T478K	D614G	L452R																										F306L
168	EPI_ISL_6036612	Narathiwat	Female	Deceased				P681R	R158del	F157del	T19R	D950B	E156G		T478K	D614G	L452R																												A222V
169	EPI_ISL_6599872	Si Sa Ket	Female	Deceased							T19R	D950B			T478K	D614G	L452R
170	EPI_ISL_6599874	Si Sa Ket	Male	Deceased				P681R								D614G	L452R
171	EPI_ISL_7373648	Chiang Rai	Female	Death		G142D		P681R	R158del	F157del	T19R	D950B	E156G	T1117I	T478K	D614G	L452R
172	EPI_ISL_7437429	Phayao	Female	Death		G142D		P681R	R158del	F157del	T19R	D950B	E156G		T478K	D614G	L452R
173	EPI_ISL_7740455	Samut Songkhram	Female	Death				P681R	R158del	F157del	T19R	D950B	E156G		T478K	D614G	L452R
174	EPI_ISL_7740456	Samut Songkhram	Female	Death	T95I	G142D		P681R	R158del	F157del	T19R	D950B	E156G		T478K	D614G	L452R
175	EPI_ISL_7869214	Krabi	unknown	Death		G142D		P681R	R158del	F157del	T19R	D950B	E156G		T478K	D614G	L452R
176	EPI_ISL_7901092	Samut Songkhram	Female	Deceased				P681R	R158del	F157del	T19R	D950B	E156G		T478K	D614G	L452R
177	EPI_ISL_7901190	Samut Songkhram	Female	Deceased	T95I			P681R	R158del	F157del	T19R	D950B	E156G		T478K	D614G	L452R
178	EPI_ISL_7901197	Samut Songkhram	Male	Deceased				P681R	R158del	F157del	T19R	D950B	E156G		T478K	D614G	L452R
179	EPI_ISL_8097997	Samut Songkhram	Female	Deceased	T95I			P681R	R158del	F157del	T19R	D950B	E156G		T478K	D614G	L452R
180	EPI_ISL_8098066	Samut Songkhram	Female	Deceased				P681R	R158del	F157del	T19R	D950B	E156G		T478K	D614G	L452R
181	EPI_ISL_8098073	Samut Songkhram	Female	Deceased				P681R	R158del	F157del	T19R	D950B	E156G			D614G
182	EPI_ISL_8798934	Bangkok	Male	Released		G142D		P681R	R158del	F157del	T19R	D950B	E156G		T478K	D614G	L452R
183	EPI_ISL_8798935	Bangkok	Female	Released		G142D		P681R	R158del	F157del	T19R	D950B	E156G		T478K	D614G	L452R
184	EPI_ISL_8798936	Bangkok	Female	Released		G142D		P681R	R158del	F157del	T19R	D950B	E156G		T478K	D614G	L452R
185	EPI_ISL_8798937	Bangkok	Male	Released		G142D		P681R	R158del	F157del	T19R	D950B	E156G		T478K	D614G	L452R
186	EPI_ISL_8799376	Bangkok	Female	Hospitalized	T95I	G142D		P681R	R158del	F157del	T19R	D950B	E156G		T478K	D614G	L452R				A522V
187	EPI_ISL_8799377	Bangkok	Male	Released	T95I	G142D		P681R	R158del	F157del	T19R	D950B	E156G		T478K	D614G	L452R				A522V
188	EPI_ISL_8799378	Bangkok	Male	Released		G142D		P681R	R158del	F157del	T19R	D950B	E156G		T478K	D614G	L452R
189	EPI_ISL_8799379	Bangkok	Female	Released		G142D		P681R	R158del	F157del	T19R	D950B	E156G		T478K	D614G	L452R
190	EPI_ISL_8799380	Bangkok	Male	Released	T95I	G142D		P681R	R158del	F157del	T19R	D950B	E156G		T478K	D614G	L452R
191	EPI_ISL_8799381	Bangkok	Female	Released		G142D		P681R	R158del	F157del	T19R	D950B	E156G		T478K	D614G	L452R
192	EPI_ISL_8799382	Bangkok	Female	Released	T95I	G142D		P681R	R158del	F157del	T19R	D950B	E156G		T478K	D614G	L452R
193	EPI_ISL_8799474	Bangkok	Female	Released	T95I	G142D		P681R	R158del	F157del	T19R	D950B	E156G		T478K	D614G	L452R	S477I
194	EPI_ISL_8799475	Bangkok	Female	Released		G142D		P681R	R158del	F157del	T19R	D950B	E156G		T478K	D614G	L452R
195	EPI_ISL_8799476	Bangkok	Male	Released	T95I	G142D		P681R	R158del	F157del	T19R	D950B	E156G		T478K	D614G	L452R
196	EPI_ISL_8799477	Bangkok	Male	Released		G142D		P681R	R158del	F157del	T19R	D950B	E156G		T478K	D614G	L452R
197	EPI_ISL_8825108	Bangkok	Female	Released		G142D		P681R	R158del	F157del	T19R	D950B	E156G		T478K	D614G	L452R
198	EPI_ISL_8825109	Bangkok	Male	Released		G142D		P681R	R158del	F157del	T19R	D950B	E156G		T478K	D614G	L452R
199	EPI_ISL_8825110	Bangkok	Female	Released		G142D		P681R	R158del	F157del	T19R	D950B	E156G		T478K	D614G	L452R
200	EPI_ISL_8825116	Bangkok	Male	Released		G142D		P681R	R158del	F157del	T19R	D950B	E156G		T478K	D614G	L452R
201	EPI_ISL_8825117	Bangkok	Female	Released	T95I	G142D		P681R	R158del	F157del	T19R	D950B	E156G		T478K	D614G	L452R
202	EPI_ISL_8825118	Bangkok	Female	Released	T95I	G142D		P681R	R158del	F157del	T19R	D950B	E156G		T478K	D614G	L452R
203	EPI_ISL_8825119	Bangkok	Male	Released		G142D		P681R	R158del	F157del	T19R	D950B	E156G		T478K	D614G	L452R
204	EPI_ISL_8825120	Bangkok	Male	Released		G142D		P681R	R158del	F157del	T19R	D950B	E156G		T478K	D614G	L452R
205	EPI_ISL_8840511	Samut Songkhram	Female	Hospitalized				P681R	R158del	F157del	T19R	D950B	E156G		T478K	D614G	L452R
206	EPI_ISL_8840516	Nakhon Pathom	Male	Hospitalized	T95I			P681R	R158del	F157del	T19R	D950B	E156G		T478K	D614G	L452R																										F306L
[truncated: 27 more columns]

## Sheet: Sheet3
															1
		Delta 44 position in S1 (1-685)			Omicron 66 position in S1				Yellow+red letter: Unique						3
	1			3					1	1		3	3		5
	5			5					5	5		5	5		10
	10			19					10	10		19	19		11
	11			24					11	11		24	24		19
	19			25					19	19		25	25		24
	29			26					29	29		26	26		25
	80			27					80	80		27	27		26
	81			67					81	81		67	67		27
	93			68					93	93		68	68		29
	95			69					95	95		69	69		67
	108			70					108	108		70	70		68
	142			71					142	142		71	71		69
	153			95					153	153		95	95		70
	156			142					156	156		142	142		71
	157			143					157	157		143	143		80
	158			144					158	158		144	144		81
	159			144					159	159		144	144		93
	160			145					160	160		145	145		95
	169			152					169	169		152	152		108
	170			157					170	170		157	157		142
	181			158					181	181		158	158		143
	216			167					216	216		167	167		144
	221			183					221	221		183	183		145
	222			200					222	222		200	200		152
	258			211					258	258		211	211		153
	261			212					261	261		212	212		156
	306			213					306	306		213	213		157
	365			214					365	365		214	214		158
	368			214					368	368		214	214		159
	369			245					369	369		245	245		160
	430			339					430	430		339	339		167
	444			346					444	444		346	346		169
	446			371					446	446		371	371		170
	452			373					452	452		373	373		181
	477			375					477	477		375	375		183
	478			376					478	478		376	376		200
	522			405					522	522		405	405		211
	614			408					614	614		408	408		212
	614			417					614	614		417	417		213
	622			440					622	622		440	440		214
	654			445					654	654		445	445		216
	655			446					655	655		446	446		221
	655			452					655	655		452	452		222
	681			477					681	681		477	477		245
		Delta 27 position in S2 (686-1273)		478					688	688		478	478		258
	688			484					693	693		484	484		261
	693			486					783	783		486	486		306
	783			486					791	791		486	486		339
	791			493					798	798		493	493		346
	798			496					818	818		496	496		365
	818			498					853	853		498	498		368
	853			501					939	939		501	501		369
	939			505					940	940		505	505		371
	940			547					946	946		547	547		373
	946			573					950	950		573	573		375
	950			614					1078	1078		614	614		376
	1078			639					1111	1111		639	639		405
	1111			642					1117	1117		642	642		408
	1117			643					1122	1122		643	643		417
	1122			647					1150	1150		647	647		430
	1150			655					1191	1191		655	655		440
	1191			658					1201	1201		658	658		444
	1201			670					1207	1207		670	670		445
	1207			678					1234	1234		678	678		446
	1234			679					1237	1237		679	679		452
	1237			681					1238	1238		681	681		477
	1238			681					1239	1239		681	681		478
	1239			684					1246	1246		684	684		484
	1246				Omicron 31 position in S2				1250	1250		689	689		486
	1250			689					1259	1259		701	701		493
	1259			701					1262	1262		706	706		496
	1262			706								764	764		498
				764								796	796		501
				796								798	798		505
				798								807	807		522
				807								822	822		547
				822								832	832		573
				832								834	834		614
				834								856	856		622
				856								879	879		639
				879								883	883		642
				883								885	885		643
				885								936	936		647
				936								950	950		654
				950								954	954		655
				954								969	969		658
				969								981	981		670
				981								987	987		678
				987								1079	1079		679
				1079								1081	1081		681
				1081								1101	1101		684
				1101								1131	1131		688
				1131								1132	1132		689
				1132								1153	1153		693
				1153								1162	1162		701
				1162								1202	1202		706
				1202								1221	1221		764
				1221								1228	1228		783
				1228								1237	1237		791
				1237											796
															798
				346S											807
				346T											818
				371F											822
				371L											832
				69F											834
				70L											853
															856
															879
															883
															885
															936
															939
															940
															946
															950
															954
															969
															981
															987
															1078
															1079
															1081
															1101
															1111
															1117
															1122
															1131
															1132
															1150
															1153
															1162
															1191
															1201
															1202
															1207
															1221
															1228
															1234
															1237
															1238
															1239
															1246
															1250
															1259
															1262

## Sheet: Delta_sort
No.	Patient status	Accession ID	Gender	location	1	5	10	11	19	29	80	81	93	95	108	142	153	156	157	158	159	160	169	170	181	216	221	222	258	261	306	365	368	369	430	444	446	452	477	478	522	614	622	654	655	655	681	688	693
24	Death	EPI_ISL_5052331	unknown	Nakhon Sawan					T19R	T29I				T95I				E156G	F157del	R158del																		L452R		T478K		D614G					P681R
1	Released	EPI_ISL_10239725	Female	Bangkok					T19R					T95I		G142D		E156G	F157del	R158del																		L452R	S477I	T478K		D614G					P681R	A688S
2	Released	EPI_ISL_10239726	Male	Bangkok		L5F			T19R					T95I		G142D		E156G	F157del	R158del																		L452R		T478K		D614G					P681R
3	Released	EPI_ISL_10239759	Female	Bangkok					T19R					T95I		G142D		E156G	F157del	R158del																		L452R		T478K		D614G					P681R
4	Released	EPI_ISL_10239777	Female	Bangkok					T19R							G142D		E156G	F157del	R158del																		L452R		T478K		D614G					P681R
5	Released	EPI_ISL_10239778	Male	Bangkok					T19R							G142D		E156G	F157del	R158del																		L452R		T478K		D614G					P681R
6	Released	EPI_ISL_10240078	Male	Bangkok					T19R					T95I		G142D		E156G	F157del	R158del																		L452R		T478K	A522S	D614G					P681R
7	Released	EPI_ISL_10240257	Female	Bangkok					T19R					T95I		G142D		E156G	F157del	R158del																		L452R		T478K		D614G					P681R
8	Released	EPI_ISL_10240313	Female	Bangkok					T19R					T95I		G142D		E156G	F157del	R158del																		L452R		T478K		D614G					P681R
9	Released	EPI_ISL_10240349	Female	Bangkok					T19R							G142D		E156G	F157del	R158del																		L452R		T478K		D614G					P681R
10	Released	EPI_ISL_10240350	Male	Bangkok					T19R			N81D				G142D		E156G	F157del										W258R									L452R		T478K		D614G					P681R
11	Released	EPI_ISL_10240581	Male	Bangkok					T19R							G142D		E156G	F157del	R158del																		L452R		T478K		D614G					P681R
12	Released	EPI_ISL_10240582	Male	Bangkok					T19R					T95I		G142D		E156G	F157del	R158del					G181V													L452R		T478K		D614G					P681R
13	Released	EPI_ISL_10282018	Female	Bangkok					T19R					T95I		G142D		E156G	F157del	R158del																		L452R		T478K		D614G					P681R
14	Released	EPI_ISL_10282019	Male	Bangkok					T19R					T95I		G142D		E156G	F157del	R158del																		L452R		T478K		D614G					P681R
15	Released	EPI_ISL_10282020	Female	Bangkok					T19R					T95I		G142D		E156G	F157del	R158del																		L452R		T478K		D614G					P681R
16	Released	EPI_ISL_10282021	Male	Bangkok					T19R					T95I		G142D		E156G	F157del	R158del																		L452R		T478K		D614G					P681R
17	Released	EPI_ISL_10282022	Female	Bangkok					T19R					T95I		G142D		E156G	F157del	R158del																		L452R		T478K		D614G					P681R
18	Released	EPI_ISL_10282023	Male	Bangkok					T19R							G142D		E156G	F157del	R158del																		L452R		T478K		D614G					P681R
19	Hospitalized	EPI_ISL_10968710	Female	Lampang					T19R					T95I		G142D		E156G	F157del	R158del																		L452R		T478K		D614G					P681R
20	Deceased	EPI_ISL_4348472	Female	Chai Nat	M1L		L10I	V11L	T19R																							Y365S	L368J	Y369E				L452R		T478K		D614G		E654G	H655N
21	Deceased	EPI_ISL_4348478	Male	Songkhla					T19R																													L452R		T478K		D614G					P681R		I693S
23	Death	EPI_ISL_4636437	Male	Narathiwat					T19R					T95I				E156G	F157del	R158del											F306L							L452R		T478K		D614G					P681R
25	Death	EPI_ISL_5052345	Male	Narathiwat					T19R					T95I				E156G	F157del	R158del																		L452R		T478K		D614G					P681R
26	Death	EPI_ISL_5052348	Female	Narathiwat					T19R									E156G	F157del	R158del								A222V										L452R		T478K		D614G					P681R
27	Death	EPI_ISL_5052349	Female	Narathiwat					T19R					T95I				E156G	F157del	R158del																		L452R		T478K		D614G					P681R
28	Death	EPI_ISL_5052350	Female	Narathiwat					T19R									E156G	F157del	R158del								A222V										L452R		T478K		D614G					P681R
29	Death	EPI_ISL_5052353	Female	Narathiwat					T19R					T95I				E156G	F157del	R158del											F306L							L452R		T478K		D614G					P681R
30	Death	EPI_ISL_5052354	Male	Narathiwat					T19R									E156G	F157del	R158del								A222V										L452R		T478K		D614G					P681R
31	Death	EPI_ISL_5052372	Male	Narathiwat					T19R							G142D		E156G	F157del	R158del																		L452R		T478K		D614G					P681R
33	Death	EPI_ISL_5052374	Female	Narathiwat					T19R		D80A					G142D		E156G	F157del	R158del											F306L							L452R		T478K		D614G					P681R
34	Death	EPI_ISL_5052376	Male	Narathiwat					T19R																													L452R		T478K		D614G
35	Death	EPI_ISL_5052377	Male	Narathiwat					T19R							G142D		E156G	F157del	R158del																		L452R		T478K		D614G					P681R
36	Death	EPI_ISL_5052425	Male	Kanchanaburi					T19R					T95I				E156G	F157del	R158del						L216F												L452R		T478K		D614G					P681R
37	Deceased	EPI_ISL_5057862	Male	Narathiwat					T19R									E156G	F157del	R158del								A222V										L452R		T478K		D614G					P681R
38	Deceased	EPI_ISL_5057867	Female	Narathiwat					T19R																													L452R		T478K		D614G					P681R
39	Deceased	EPI_ISL_5057869	Female	Narathiwat					T19R																													L452R		T478K		D614G
40	Death	EPI_ISL_5416189	Female	Narathiwat					T19R							G142D		E156G	F157del	R158del								A222V										L452R		T478K		D614G					P681R
41	Death	EPI_ISL_5416195	Male	Narathiwat					T19R							G142D		E156G	F157del	R158del																		L452R		T478K		D614G					P681R
42	Death	EPI_ISL_5425827	Male	Narathiwat					T19R					T95I				E156G	F157del	R158del																		L452R		T478K		D614G					P681R
43	Deceased	EPI_ISL_5446176	Female	Narathiwat					T19R					T95I				E156G	F157del	R158del											F306L							L452R		T478K		D614G					P681R
44	Deceased	EPI_ISL_5446177	Female	Narathiwat					T19R									E156G	F157del	R158del																		L452R		T478K		D614G					P681R
45	Deceased	EPI_ISL_5446179	Female	Narathiwat					T19R					T95I		G142D		E156G	F157del	R158del																		L452R		T478K		D614G					P681R
46	Nasopharyngeal swab and Oropharyngeal swab	EPI_ISL_5643174	Male	Chanthaburi					T19R					T95I		G142D		E156G	F157del	R158del																		L452R		T478K		D614G					P681R
47	Nasopharyngeal swab and Oropharyngeal swab	EPI_ISL_5643175	Female	Chanthaburi					T19R					T95I		G142D		E156G	F157del	R158del							S221A											L452R		T478K		D614G					P681R
48	Nasopharyngeal swab and Oropharyngeal swab	EPI_ISL_5643176	Male	Chanthaburi					T19R					T95I		G142D		E156G	F157del	R158del															T430I			L452R		T478K		D614G					P681R
49	Nasopharyngeal swab and Oropharyngeal swab	EPI_ISL_5643177	Male	Chanthaburi					T19R					T95I		G142D		E156G	F157del	R158del																		L452R		T478K		D614G					P681R
50	Nasopharyngeal swab and Oropharyngeal swab	EPI_ISL_5643178	Female	Chanthaburi					T19R					T95I		G142D		E156G	F157del	R158del																		L452R		T478K		D614G					P681R
51	Nasopharyngeal swab and Oropharyngeal swab	EPI_ISL_5643179	Female	Chanthaburi					T19R					T95I		G142D		E156G	F157del	R158del																		L452R		T478K		D614G					P681R
52	Nasopharyngeal swab and Oropharyngeal swab	EPI_ISL_5643180	Male	Chanthaburi					T19R					T95I		G142D		E156G	F157del	R158del																		L452R		T478K		D614G					P681R
53	Nasopharyngeal swab and Oropharyngeal swab	EPI_ISL_5643181	Female	Chanthaburi					T19R					T95I		G142D		E156G	F157del	R158del																		L452R		T478K		D614G					P681R
54	Nasopharyngeal swab and Oropharyngeal swab	EPI_ISL_5643182	Female	Chanthaburi					T19R					T95I		G142D		E156G	F157del	R158del																		L452R		T478K		D614G					P681R
55	Nasopharyngeal swab and Oropharyngeal swab	EPI_ISL_5643183	Male	Chanthaburi					T19R					T95I		G142D		E156G	F157del	R158del																		L452R		T478K		D614G					P681R
56	Nasopharyngeal swab and Oropharyngeal swab	EPI_ISL_5643184	Male	Chanthaburi					T19R							G142D		E156G	F157del	R158del																		L452R		T478K		D614G					P681R
57	Nasopharyngeal swab and Oropharyngeal swab	EPI_ISL_5643185	Male	Chanthaburi					T19R				A93S	T95I		G142D		E156G	F157del	R158del																		L452R		T478K		D614G					P681R
58	Nasopharyngeal swab and Oropharyngeal swab	EPI_ISL_5643186	Male	Chanthaburi					T19R					T95I		G142D		E156G	F157del	R158del																		L452R		T478K		D614G					P681R
59	Nasopharyngeal swab and Oropharyngeal swab	EPI_ISL_5643187	Male	Chanthaburi					T19R					T95I		G142D		E156G	F157del	R158del																		L452R		T478K		D614G					P681R
60	Nasopharyngeal swab and Oropharyngeal swab	EPI_ISL_5643188	Female	Chanthaburi					T19R					T95I		G142D		E156G	F157del	R158del																		L452R		T478K		D614G					P681R
61	Nasopharyngeal swab and Oropharyngeal swab	EPI_ISL_5643189	Male	Chanthaburi					T19R					T95I		G142D		E156G	F157del	R158del										G261C								L452R		T478K		D614G					P681R
62	Nasopharyngeal swab and Oropharyngeal swab	EPI_ISL_5643190	Male	Chanthaburi					T19R					T95I		G142D		E156G	F157del	R158del																		L452R		T478K		D614G					P681R
63	Nasopharyngeal swab and Oropharyngeal swab	EPI_ISL_5643191	Male	Chanthaburi					T19R					T95I		G142D		E156G	F157del	R158del																		L452R		T478K		D614G					P681R
64	Nasopharyngeal swab and Oropharyngeal swab	EPI_ISL_5643192	Female	Chanthaburi					T19R					T95I		G142D		E156G	F157del	R158del																		L452R		T478K		D614G					P681R
65	Nasopharyngeal swab and Oropharyngeal swab	EPI_ISL_5643193	Male	Chanthaburi					T19R					T95I		G142D		E156G	F157del	R158del																		L452R		T478K		D614G					P681R
66	Nasopharyngeal swab and Oropharyngeal swab	EPI_ISL_5643194	Male	Chanthaburi					T19R					T95I		G142D		E156G	F157del	R158del																		L452R		T478K		D614G					P681R
67	Nasopharyngeal swab and Oropharyngeal swab	EPI_ISL_5643195	Female	Chanthaburi					T19R					T95I		G142D		E156G	F157del	R158del																		L452R		T478K		D614G					P681R
68	Nasopharyngeal swab and Oropharyngeal swab	EPI_ISL_5643196	Female	Chanthaburi					T19R					T95I		G142D		E156G	F157del	R158del																		L452R		T478K		D614G					P681R
69	Nasopharyngeal swab and Oropharyngeal swab	EPI_ISL_5643197	Female	Chanthaburi					T19R					T95I		G142D		E156G	F157del	R158del																		L452R		T478K		D614G					P681R
70	Nasopharyngeal swab and Oropharyngeal swab	EPI_ISL_5643198	Female	Chanthaburi					T19R					T95I		G142D		E156G	F157del	R158del																		L452R		T478K		D614G					P681R
71	Nasopharyngeal swab and Oropharyngeal swab	EPI_ISL_5643199	Male	Chanthaburi					T19R					T95I		G142D		E156G	F157del	R158del																		L452R		T478K		D614G					P681R
72	Nasopharyngeal swab and Oropharyngeal swab	EPI_ISL_5643200	Male	Chanthaburi					T19R					T95I		G142D		E156G	F157del	R158del																		L452R		T478K		D614G					P681R
73	Nasopharyngeal swab and Oropharyngeal swab	EPI_ISL_5643201	Female	Chanthaburi					T19R					T95I		G142D		E156G	F157del	R158del																		L452R		T478K		D614G					P681R
74	Nasopharyngeal swab and Oropharyngeal swab	EPI_ISL_5643202	Male	Chanthaburi					T19R					T95I		G142D		E156G	F157del	R158del																		L452R		T478K		D614G					P681R
75	Nasopharyngeal swab and Oropharyngeal swab	EPI_ISL_5643203	Female	Chanthaburi					T19R					T95I		G142D		E156G	F157del	R158del																		L452R		T478K		D614G					P681R
76	Nasopharyngeal swab and Oropharyngeal swab	EPI_ISL_5643204	Male	Chanthaburi					T19R					T95I		G142D		E156G	F157del	R158del																		L452R		T478K		D614G					P681R
77	Nasopharyngeal swab and Oropharyngeal swab	EPI_ISL_5643205	Male	Chanthaburi					T19R					T95I		G142D		E156G	F157del	R158del																		L452R		T478K		D614G					P681R
78	Nasopharyngeal swab and Oropharyngeal swab	EPI_ISL_5643206	Male	Chanthaburi					T19R					T95I		G142D		E156G	F157del	R158del																		L452R		T478K		D614G					P681R
79	Nasopharyngeal swab and Oropharyngeal swab	EPI_ISL_5643207	Female	Chanthaburi					T19R					T95I		G142D		E156G	F157del	R158del																		L452R		T478K		D614G					P681R
80	Nasopharyngeal swab and Oropharyngeal swab	EPI_ISL_5643208	Female	Chanthaburi					T19R					T95I		G142D		E156G	F157del	R158del							S221A											L452R		T478K		D614G					P681R
81	Nasopharyngeal swab and Oropharyngeal swab	EPI_ISL_5643209	Male	Chanthaburi					T19R					T95I		G142D		E156G	F157del	R158del																		L452R		T478K		D614G					P681R
82	Nasopharyngeal swab and Oropharyngeal swab	EPI_ISL_5643210	Male	Chanthaburi					T19R					T95I		G142D		E156G	F157del	R158del																		L452R		T478K		D614G					P681R
83	Nasopharyngeal swab and Oropharyngeal swab	EPI_ISL_5643211	Female	Chanthaburi					T19R					T95I		G142D		E156G	F157del	R158del																		L452R		T478K		D614G					P681R
84	Nasopharyngeal swab and Oropharyngeal swab	EPI_ISL_5643212	Male	Chanthaburi					T19R					T95I		G142D		E156G	F157del	R158del																		L452R		T478K		D614G					P681R
85	Nasopharyngeal swab and Oropharyngeal swab	EPI_ISL_5643213	Male	Chanthaburi					T19R					T95I		G142D		E156G	F157del	R158del																		L452R		T478K		D614G					P681R
86	Nasopharyngeal swab and Oropharyngeal swab	EPI_ISL_5643214	Male	Chanthaburi					T19R					T95I		G142D		E156G	F157del	R158del																		L452R		T478K		D614G					P681R
87	Nasopharyngeal swab and Oropharyngeal swab	EPI_ISL_5643215	Female	Chanthaburi					T19R					T95I		G142D		E156G	F157del	R158del																		L452R		T478K		D614G					P681R
88	Nasopharyngeal swab and Oropharyngeal swab	EPI_ISL_5643216	Female	Chanthaburi					T19R					T95I		G142D		E156G	F157del	R158del																		L452R		T478K		D614G					P681R
89	Nasopharyngeal swab and Oropharyngeal swab	EPI_ISL_5643217	Male	Chanthaburi					T19R					T95I		G142D		E156G	F157del	R158del																		L452R		T478K		D614G					P681R
90	Nasopharyngeal swab and Oropharyngeal swab	EPI_ISL_5643218	Female	Chanthaburi					T19R					T95I		G142D		E156G	F157del	R158del																		L452R		T478K		D614G					P681R
91	Nasopharyngeal swab and Oropharyngeal swab	EPI_ISL_5643219	Male	Chanthaburi					T19R					T95I		G142D		E156G	F157del	R158del																		L452R		T478K		D614G					P681R
92	Nasopharyngeal swab and Oropharyngeal swab	EPI_ISL_5643220	Female	Chanthaburi					T19R					T95I		G142D		E156G	F157del	R158del																		L452R		T478K		D614G					P681R
93	Nasopharyngeal swab and Oropharyngeal swab	EPI_ISL_5643221	Male	Chanthaburi					T19R					T95I		G142D		E156G	F157del	R158del																		L452R		T478K		D614G					P681R
94	Nasopharyngeal swab and Oropharyngeal swab	EPI_ISL_5643222	Male	Chanthaburi					T19R							G142D		E156G	F157del	R158del																		L452R		T478K		D614G					P681R
95	Nasopharyngeal swab and Oropharyngeal swab	EPI_ISL_5643223	Female	Chanthaburi					T19R					T95I		G142D		E156G	F157del	R158del																		L452R		T478K		D614G					P681R
96	Nasopharyngeal swab and Oropharyngeal swab	EPI_ISL_5643224	Male	Chanthaburi					T19R					T95I		G142D		E156G	F157del	R158del																		L452R		T478K		D614G					P681R
97	Nasopharyngeal swab and Oropharyngeal swab	EPI_ISL_5643225	Male	Chanthaburi					T19R							G142D		E156G	F157del	R158del																		L452R		T478K		D614G					P681R
98	Nasopharyngeal swab and Oropharyngeal swab	EPI_ISL_5643226	Male	Chanthaburi					T19R					T95I		G142D		E156G	F157del	R158del																		L452R		T478K		D614G					P681R
99	Nasopharyngeal swab and Oropharyngeal swab	EPI_ISL_5643227	Male	Chanthaburi					T19R					T95I		G142D		E156G	F157del	R158del																		L452R		T478K		D614G					P681R
100	Nasopharyngeal swab and Oropharyngeal swab	EPI_ISL_5643228	Female	Chanthaburi					T19R					T95I		G142D		E156G	F157del	R158del																		L452R		T478K		D614G					P681R
101	Nasopharyngeal swab and Oropharyngeal swab	EPI_ISL_5643229	Female	Chanthaburi					T19R					T95I		G142D		E156G	F157del	R158del																		L452R		T478K		D614G					P681R
102	Nasopharyngeal swab and Oropharyngeal swab	EPI_ISL_5643230	Female	Chanthaburi					T19R					T95I		G142D		E156G	F157del	R158del																		L452R		T478K		D614G					P681R
103	Nasopharyngeal swab and Oropharyngeal swab	EPI_ISL_5643231	Male	Chanthaburi					T19R					T95I		G142D		E156G	F157del	R158del																		L452R		T478K		D614G					P681R
104	Nasopharyngeal swab and Oropharyngeal swab	EPI_ISL_5643232	Female	Chanthaburi					T19R					T95I		G142D		E156G	F157del	R158del																		L452R		T478K		D614G					P681R
105	Nasopharyngeal swab and Oropharyngeal swab	EPI_ISL_5643233	Male	Chanthaburi					T19R					T95I		G142D		E156G	F157del	R158del																		L452R		T478K		D614G					P681R
106	Nasopharyngeal swab and Oropharyngeal swab	EPI_ISL_5643234	Female	Chanthaburi					T19R					T95I		G142D		E156G	F157del	R158del																		L452R		T478K		D614G					P681R
107	Nasopharyngeal swab and Oropharyngeal swab	EPI_ISL_5643235	Male	Chanthaburi					T19R				A93S	T95I		G142D		E156G	F157del	R158del																		L452R		T478K		D614G					P681R
108	Nasopharyngeal swab and Oropharyngeal swab	EPI_ISL_5643236	Male	Chanthaburi					T19R					T95I		G142D		E156G	F157del	R158del																		L452R		T478K		D614G					P681R
109	Nasopharyngeal swab and Oropharyngeal swab	EPI_ISL_5643237	Female	Chanthaburi					T19R					T95I		G142D		E156G	F157del	R158del																		L452R		T478K		D614G					P681R
110	Nasopharyngeal swab and Oropharyngeal swab	EPI_ISL_5643238	Female	Chanthaburi					T19R					T95I		G142D		E156G	F157del	R158del																		L452R		T478K		D614G					P681R
111	Nasopharyngeal swab and Oropharyngeal swab	EPI_ISL_5643239	Male	Chanthaburi					T19R				A93S	T95I		G142D		E156G	F157del	R158del																		L452R		T478K		D614G					P681R
112	Nasopharyngeal swab and Oropharyngeal swab	EPI_ISL_5643240	Male	Chanthaburi					T19R					T95I		G142D		E156G	F157del	R158del																		L452R		T478K		D614G					P681R
113	Nasopharyngeal swab and Oropharyngeal swab	EPI_ISL_5643241	Female	Chanthaburi					T19R					T95I		G142D		E156G	F157del	R158del																		L452R		T478K		D614G					P681R
114	Nasopharyngeal swab and Oropharyngeal swab	EPI_ISL_5643242	Male	Chanthaburi					T19R					T95I		G142D		E156G	F157del	R158del																		L452R		T478K		D614G					P681R
115	Nasopharyngeal swab and Oropharyngeal swab	EPI_ISL_5643243	Female	Chanthaburi					T19R							G142D		E156G	F157del	R158del																		L452R		T478K		D614G					P681R
116	Nasopharyngeal swab and Oropharyngeal swab	EPI_ISL_5643244	Female	Chanthaburi					T19R					T95I		G142D		E156G	F157del	R158del																		L452R		T478K		D614G					P681R
117	Nasopharyngeal swab and Oropharyngeal swab	EPI_ISL_5643245	Female	Chanthaburi					T19R							G142D		E156G	F157del	R158del																		L452R		T478K		D614G					P681R
118	Nasopharyngeal swab and Oropharyngeal swab	EPI_ISL_5643246	Male	Chanthaburi					T19R							G142D		E156G	F157del	R158del																		L452R		T478K		D614G					P681R
119	Nasopharyngeal swab and Oropharyngeal swab	EPI_ISL_5643247	Female	Chanthaburi					T19R							G142D		E156G	F157del	R158del																		L452R		T478K		D614G					P681R
120	Nasopharyngeal swab and Oropharyngeal swab	EPI_ISL_5643248	Female	Chanthaburi					T19R							G142D		E156G	F157del	R158del																		L452R		T478K		D614G					P681R
121	Nasopharyngeal swab and Oropharyngeal swab	EPI_ISL_5643249	Female	Chanthaburi					T19R							G142D		E156G	F157del	R158del																		L452R		T478K		D614G					P681R
122	Nasopharyngeal swab and Oropharyngeal swab	EPI_ISL_5643250	Female	Chanthaburi					T19R							G142D		E156G	F157del	R158del																		L452R		T478K		D614G					P681R
123	Nasopharyngeal swab and Oropharyngeal swab	EPI_ISL_5643251	Male	Chanthaburi					T19R					T95I		G142D		E156G	F157del	R158del																		L452R		T478K		D614G					P681R
124	Nasopharyngeal swab and Oropharyngeal swab	EPI_ISL_5643252	Male	Chanthaburi					T19R					T95I		G142D		E156G	F157del	R158del							S221A											L452R		T478K		D614G					P681R
125	Nasopharyngeal swab and Oropharyngeal swab	EPI_ISL_5643253	Male	Chanthaburi					T19R					T95I		G142D		E156G	F157del	R158del																		L452R		T478K		D614G					P681R
126	Nasopharyngeal swab and Oropharyngeal swab	EPI_ISL_5643254	Male	Chanthaburi					T19R					T95I		G142D		E156G	F157del	R158del																		L452R		T478K		D614G					P681R
127	Nasopharyngeal swab and Oropharyngeal swab	EPI_ISL_5695366	Male	Chanthaburi					T19R					T95I		G142D		E156G	F157del	R158del																		L452R		T478K		D614G					P681R
128	Released	EPI_ISL_5879592	Female	Bangkok					T19R					T95I		G142D		E156G	F157del	R158del																		L452R		T478K		D614G					P681R
129	Released	EPI_ISL_5879597	Male	Bangkok					T19R							G142D		E156G	F157del	R158del																		L452R		T478K		D614G					P681R
130	Released	EPI_ISL_5879598	Female	Bangkok					T19R							G142D		E156G	F157del	R158del																		L452R		T478K		D614G					P681R
131	Released	EPI_ISL_5879600	Male	Bangkok					T19R							G142D		E156G	F157del	R158del																		L452R		T478K		D614G					P681R
132	Released	EPI_ISL_5879601	Female	Bangkok					T19R						T108S	G142D		E156G	F157del	R158del																		L452R		T478K		D614G					P681R
133	Released	EPI_ISL_5879614	Female	Bangkok					T19R					T95I		G142D		E156G	F157del	R158del																		L452R		T478K		D614G					P681R
134	Released	EPI_ISL_5879615	Female	Bangkok					T19R							G142D		E156G	F157del	R158del																		L452R		T478K		D614G					P681R
135	Released	EPI_ISL_5879623	Male	Bangkok					T19R							G142D		E156G	F157del	R158del																		L452R		T478K		D614G					P681R
136	Released	EPI_ISL_5879633	Male	Bangkok					T19R							G142D		E156G	F157del	R158del																		L452R		T478K		D614G					P681R
137	Released	EPI_ISL_5879635	Male	Bangkok					T19R							G142D		E156G	F157del	R158del																		L452R		T478K		D614G					P681R
138	Released	EPI_ISL_5879729	Male	Bangkok					T19R					T95I		G142D		E156G	F157del	R158del																		L452R		T478K		D614G					P681R
139	Released	EPI_ISL_5879819	Female	Bangkok					T19R					T95I		G142D		E156G	F157del	R158del																		L452R		T478K		D614G					P681R
140	Released	EPI_ISL_5879823	Male	Bangkok					T19R							G142D		E156G	F157del	R158del																		L452R		T478K		D614G					P681R
141	Released	EPI_ISL_5879824	Female	Bangkok					T19R							G142D		E156G	F157del	R158del																		L452R		T478K		D614G					P681R
142	Released	EPI_ISL_5879908	Female	Bangkok					T19R					T95I		G142D		E156G	F157del	R158del																		L452R		T478K		D614G					P681R
143	Released	EPI_ISL_5879918	Male	Bangkok					T19R							G142D		E156G	F157del	R158del																		L452R		T478K		D614G					P681R
144	Released	EPI_ISL_5879921	Male	Bangkok					T19R					T95I		G142D		E156G	F157del	R158del																		L452R		T478K		D614G					P681R
145	Released	EPI_ISL_5879923	Male	Bangkok					T19R							G142D		E156G	F157del	R158del																		L452R		T478K		D614G					P681R
146	Released	EPI_ISL_5880076	Female	Bangkok					T19R					T95I		G142D		E156G	F157del	R158del																		L452R		T478K		D614G					P681R
147	Released	EPI_ISL_5880288	Male	Bangkok					T19R							G142D		E156G	F157del	R158del																		L452R		T478K		D614G					P681R
148	Released	EPI_ISL_5880433	Female	Bangkok					T19R					T95I		G142D		E156G	F157del	R158del																		L452R		T478K		D614G					P681R
149	Released	EPI_ISL_5880434	Male	Bangkok					T19R					T95I		G142D		E156G	F157del	R158del																		L452R		T478K		D614G					P681R
150	Released	EPI_ISL_5880497	Male	Bangkok					T19R					T95I		G142D		E156G	F157del	R158del																		L452R		T478K		D614G					P681R
151	Deceased	EPI_ISL_6036300	unknown	Narathiwat					T19R					T95I				E156G	F157del	R158del																		L452R		T478K		D614G					P681R
152	Deceased	EPI_ISL_6036306	Female	Narathiwat					T19R					T95I				E156G	F157del	R158del																		L452R		T478K		D614G					P681R
153	Deceased	EPI_ISL_6036311	unknown	Narathiwat					T19R					T95I		G142D		E156G	F157del	R158del																		L452R		T478K		D614G					P681R
154	Hospitalized	EPI_ISL_6036320	unknown	Songkhla					T19R									E156G	F157del	R158del																		L452R		T478K		D614G					P681R
155	Hospitalized	EPI_ISL_6036322	Female	Narathiwat					T19R									E156G	F157del	R158del								A222V										L452R		T478K		D614G					P681R
156	Deceased	EPI_ISL_6036325	unknown	Narathiwat					T19R					T95I				E156G	F157del	R158del																		L452R		T478K		D614G					P681R
157	Hospitalized	EPI_ISL_6036340	Female	Songkhla					T19R									E156G	F157del	R158del																		L452R		T478K		D614G					P681R
158	Deceased	EPI_ISL_6036358	unknown	Narathiwat					T19R					T95I				E156G	F157del	R158del											F306L							L452R		T478K		D614G					P681R
159	Deceased	EPI_ISL_6036367	unknown	Narathiwat		L5F			T19R					T95I				E156G	F157del	R158del											F306L							L452R		T478K		D614G					P681R
160	Deceased	EPI_ISL_6036449	Female	Songkhla					T19R									E156G	F157del	R158del								A222V										L452R		T478K		D614G					P681R
161	Deceased	EPI_ISL_6036455	Female	Songkhla					T19R					T95I				E156G	F157del	R158del											F306L							L452R		T478K		D614G					P681R
162	Deceased	EPI_ISL_6036480	unknown	Songkhla					T19R									E156G	F157del	R158del								A222V										L452R		T478K		D614G					P681R
163	Deceased	EPI_ISL_6036486	unknown	Songkhla					T19R					T95I				E156G	F157del	R158del											F306L							L452R		T478K		D614G					P681R
164	Hospitalized	EPI_ISL_6036556	Female	Songkhla					T19R									E156G	F157del	R158del																		L452R		T478K		D614G					P681R
165	Deceased	EPI_ISL_6036574	Male	Songkhla					T19R												V159del	Y160del						A222V										L452R		T478K		D614G					P681R
166	Deceased	EPI_ISL_6036600	Female	Narathiwat					T19R									E156G	F157del	R158del																		L452R		T478K		D614G					P681R
167	Deceased	EPI_ISL_6036608	unknown	Songkhla					T19R									E156G	F157del	R158del											F306L							L452R		T478K		D614G					P681R
168	Deceased	EPI_ISL_6036612	Female	Narathiwat					T19R									E156G	F157del	R158del								A222V										L452R		T478K		D614G					P681R
169	Deceased	EPI_ISL_6599872	Female	Si Sa Ket					T19R														E169del	Y170del														L452R		T478K		D614G
171	Death	EPI_ISL_7373648	Female	Chiang Rai					T19R							G142D		E156G	F157del	R158del																		L452R		T478K		D614G					P681R
172	Death	EPI_ISL_7437429	Female	Phayao					T19R							G142D		E156G	F157del	R158del																		L452R		T478K		D614G					P681R
173	Death	EPI_ISL_7740455	Female	Samut Songkhram					T19R								M153I	E156G	F157del	R158del																		L452R		T478K		D614G				H655P	P681R
174	Death	EPI_ISL_7740456	Female	Samut Songkhram					T19R					T95I		G142D		E156G	F157del	R158del																		L452R		T478K		D614G					P681R
175	Death	EPI_ISL_7869214	unknown	Krabi					T19R							G142D		E156G	F157del	R158del																		L452R		T478K		D614G					P681R
176	Deceased	EPI_ISL_7901092	Female	Samut Songkhram					T19R									E156G	F157del	R158del																		L452R		T478K		D614G					P681R
177	Deceased	EPI_ISL_7901190	Female	Samut Songkhram					T19R					T95I				E156G	F157del	R158del																		L452R		T478K		D614G					P681R
178	Deceased	EPI_ISL_7901197	Male	Samut Songkhram					T19R									E156G	F157del	R158del																		L452R		T478K		D614G					P681R
179	Deceased	EPI_ISL_8097997	Female	Samut Songkhram					T19R					T95I				E156G	F157del	R158del																		L452R		T478K		D614G	V622I				P681R
180	Deceased	EPI_ISL_8098066	Female	Samut Songkhram					T19R									E156G	F157del	R158del																		L452R		T478K		D614G					P681R
181	Deceased	EPI_ISL_8098073	Female	Samut Songkhram					T19R									E156G	F157del	R158del																						D614G					P681R
182	Released	EPI_ISL_8798934	Male	Bangkok					T19R							G142D		E156G	F157del	R158del																		L452R		T478K		D614G					P681R
183	Released	EPI_ISL_8798935	Female	Bangkok					T19R							G142D		E156G	F157del	R158del																		L452R		T478K		D614G					P681R
184	Released	EPI_ISL_8798936	Female	Bangkok					T19R							G142D		E156G	F157del	R158del																	G446V	L452R		T478K		D614G					P681R
185	Released	EPI_ISL_8798937	Male	Bangkok					T19R							G142D		E156G	F157del	R158del																	G446V	L452R		T478K		D614G					P681R
186	Hospitalized	EPI_ISL_8799376	Female	Bangkok					T19R					T95I		G142D		E156G	F157del	R158del																		L452R		T478K	A522V	D614G					P681R
187	Released	EPI_ISL_8799377	Male	Bangkok					T19R					T95I		G142D		E156G	F157del	R158del																		L452R		T478K	A522V	D614G					P681R
188	Released	EPI_ISL_8799378	Male	Bangkok					T19R							G142D		E156G	F157del	R158del																		L452R		T478K		D614G					P681R
189	Released	EPI_ISL_8799379	Female	Bangkok					T19R							G142D		E156G	F157del	R158del																		L452R		T478K		D614G					P681R
190	Released	EPI_ISL_8799380	Male	Bangkok					T19R					T95I		G142D		E156G	F157del	R158del																		L452R		T478K		D614G					P681R
191	Released	EPI_ISL_8799381	Female	Bangkok					T19R							G142D		E156G	F157del	R158del																		L452R		T478K		D614G					P681R
192	Released	EPI_ISL_8799382	Female	Bangkok					T19R					T95I		G142D		E156G	F157del	R158del																		L452R		T478K		D614G					P681R
193	Released	EPI_ISL_8799474	Female	Bangkok					T19R					T95I		G142D		E156G	F157del	R158del																		L452R	S477I	T478K		D614G					P681R
194	Released	EPI_ISL_8799475	Female	Bangkok					T19R							G142D		E156G	F157del	R158del																		L452R		T478K		D614G					P681R
195	Released	EPI_ISL_8799476	Male	Bangkok					T19R					T95I		G142D		E156G	F157del	R158del																		L452R		T478K		D614G					P681R
196	Released	EPI_ISL_8799477	Male	Bangkok					T19R							G142D		E156G	F157del	R158del																		L452R		T478K		D614G					P681R
197	Released	EPI_ISL_8825108	Female	Bangkok					T19R							G142D		E156G	F157del	R158del																		L452R		T478K		D614G					P681R
198	Released	EPI_ISL_8825109	Male	Bangkok					T19R							G142D		E156G	F157del	R158del																		L452R		T478K		D614G					P681R
199	Released	EPI_ISL_8825110	Female	Bangkok					T19R							G142D		E156G	F157del	R158del																		L452R		T478K		D614G					P681R
200	Released	EPI_ISL_8825116	Male	Bangkok					T19R							G142D		E156G	F157del	R158del																		L452R		T478K		D614G					P681R
201	Released	EPI_ISL_8825117	Female	Bangkok					T19R					T95I		G142D		E156G	F157del	R158del																		L452R		T478K		D614G					P681R
202	Released	EPI_ISL_8825118	Female	Bangkok					T19R					T95I		G142D		E156G	F157del	R158del																		L452R		T478K		D614G					P681R
203	Released	EPI_ISL_8825119	Male	Bangkok					T19R							G142D		E156G	F157del	R158del																		L452R		T478K		D614G					P681R
204	Released	EPI_ISL_8825120	Male	Bangkok					T19R							G142D		E156G	F157del	R158del																		L452R		T478K		D614G					P681R
205	Hospitalized	EPI_ISL_8840511	Female	Samut Songkhram					T19R									E156G	F157del	R158del																		L452R		T478K		D614G					P681R
206	Hospitalized	EPI_ISL_8840516	Male	Nakhon Pathom					T19R					T95I				E156G	F157del	R158del											F306L							L452R		T478K		D614G					P681R
22	Deceased	EPI_ISL_4635436	unknown	Narathiwat																																K444N		L452R		T478K		D614G					P681R
32	Death	EPI_ISL_5052373	Female	Narathiwat												G142D		E156G	F157del									A222V										L452R		T478K		D614G					P681R
170	Deceased	EPI_ISL_6599874	Male	Si Sa Ket																			E169del	Y170del														L452R				D614G					P681R
					M1L	L5F	L10I	V11L	T19R	T29I	D80A	N81D	A93S	T95I	T108S	G142D	M153I	E156G	F157del	R158del	V159del	Y160del	E169del	Y170del	G181V	L216F	S221A	A222V	W258R	G261C	F306L	Y365S	L368J	Y369E	T430I	K444N	G446V	L452R	S477I	T478K	A522S	D614G	V622I	E654G	H655N	H655P	P681R	A688S	I693S
																																									A522V
[truncated: 27 more columns]

## Sheet: Omicron_sort
No.	Patient status	Accession ID	Gender	location	3	5	19	24	25	26	27	67	68	69	70	71	95	142	143	144	145	152	157	158	167	183	200	211	212	213	214	214	245	339	346	373	375	376	405	408	417	440	445	446	452	477	478	484	486
1	Released	EPI_ISL_10189523	Male	Bangkok								A67V		H69del	V70del		T95I	G142D	V143del	Y144del	Y145del							N211del	L212I		ins214EPE			G339D		S373P	S375F				K417N	N440K		G446S		S477N	T478K	E484A
2	Released	EPI_ISL_10189524	Male	Bangkok								A67V		H69del	V70del		T95I	G142D	V143del	Y144del	Y145del							N211del	L212I		ins214EPE			G339D		S373P	S375F				K417N	N440K		G446S		S477N	T478K	E484A
3	Released	EPI_ISL_10189525	Female	Bangkok								A67V		H69del	V70del		T95I	G142D	V143del	Y144del	Y145del							N211del	L212I		ins214EPE			G339D		S373P	S375F				K417N	N440K		G446S		S477N	T478K	E484A
4	Released	EPI_ISL_10189526	Female	Bangkok								A67V		H69del	V70del		T95I	G142D	V143del	Y144del	Y145del							N211del	L212I		ins214EPE			G339D	R346K	S373P	S375F				K417N	N440K		G446S		S477N	T478K	E484A
5	Released	EPI_ISL_10189527	Female	Bangkok								A67V		H69del	V70del		T95I	G142D	V143del	Y144del	Y145del							N211del	L212I		ins214EPE			G339D	R346K	S373P	S375F				K417N	N440K		G446S		S477N	T478K	E484A
6	Released	EPI_ISL_10189528	Male	Bangkok								A67V		H69del	V70del		T95I	G142D	V143del	Y144del	Y145del							N211del	L212I		ins214EPE			G339D	R346K	S373P	S375F				K417N	N440K		G446S		S477N	T478K	E484A
7	Released	EPI_ISL_10189532	Male	Bangkok								A67V		H69del	V70del		T95I	G142D	V143del	Y144del	Y145del							N211del	L212I		ins214EPE			G339D		S373P	S375F				K417N	N440K		G446S		S477N	T478K	E484A
8	Released	EPI_ISL_10189533	Male	Bangkok								A67V		H69del	V70del		T95I	G142D	V143del	Y144del	Y145del							N211del	L212I		ins214EPE			G339D	R346K	S373P	S375F				K417N	N440K		G446S		S477N	T478K	E484A
9	Released	EPI_ISL_10189534	Male	Bangkok								A67V		H69del	V70del		T95I	G142D	V143del	Y144del	Y145del							N211del	L212I		ins214EPE			G339D	R346K	S373P	S375F				K417N	N440K		G446S		S477N	T478K	E484A
10	Released	EPI_ISL_10189536	Female	Bangkok								A67V		H69del	V70del		T95I	G142D	V143del	Y144del	Y145del							N211del	L212I		ins214EPE			G339D	R346K	S373P	S375F				K417N	N440K		G446S		S477N	T478K	E484A
11	Released	EPI_ISL_10189537	Male	Bangkok								A67V		H69del	V70del		T95I	G142D	V143del	Y144del	Y145del							N211del	L212I		ins214EPE			G339D	R346K	S373P	S375F				K417N	N440K		G446S		S477N	T478K	E484A
12	Released	EPI_ISL_10189538	Female	Bangkok								A67V		H69del	V70del		T95I	G142D	V143del	Y144del	Y145del							N211del	L212I		ins214EPE			G339D	R346K	S373P	S375F				K417N	N440K		G446S		S477N	T478K	E484A
13	Released	EPI_ISL_10189544	Male	Bangkok								A67V		H69del	V70del		T95I	G142D	V143del	Y144del	Y145del							N211del	L212I		ins214EPE			G339D	R346K	S373P	S375F				K417N	N440K		G446S		S477N	T478K	E484A
14	Released	EPI_ISL_10238965	Male	Bangkok								A67V		H69del	V70del		T95I	G142D	V143del	Y144del	Y145del							N211del	L212I		ins214EPE			G339D	R346K	S373P	S375F				K417N	N440K		G446S		S477N	T478K	E484A
15	Released	EPI_ISL_10239054	Female	Bangkok								A67V		H69del	V70del		T95I	G142D	V143del	Y144del	Y145del							N211del	L212I		ins214EPE			G339D	R346K	S373P	S375F				K417N	N440K		G446S		S477N	T478K	E484A
16	Released	EPI_ISL_10239055	Male	Bangkok								A67V		H69del	V70del		T95I	G142D	V143del	Y144del	Y145del							N211del	L212I		ins214EPE			G339D		S373P	S375F				K417N	N440K		G446S		S477N	T478K	E484A
17	Released	EPI_ISL_10239056	Male	Bangkok								A67V		H69del	V70del		T95I	G142D	V143del	Y144del	Y145del							N211del	L212I		ins214EPE			G339D	R346K	S373P	S375F				K417N	N440K		G446S		S477N	T478K	E484A
18	Released	EPI_ISL_10239057	Female	Bangkok								A67V		H69del	V70del		T95I	G142D	V143del	Y144del	Y145del							N211del	L212I		ins214EPE			G339D		S373P	S375F				K417N	N440K		G446S		S477N	T478K	E484A
19	Released	EPI_ISL_10239119	Male	Bangkok								A67V		H69del	V70del		T95I	G142D	V143del	Y144del	Y145del							N211del	L212I		ins214EPE			G339D		S373P	S375F				K417N	N440K		G446S		S477N	T478K	E484A
20	Released	EPI_ISL_10239120	Female	Bangkok								A67V		H69del	V70del		T95I	G142D	V143del	Y144del	Y145del							N211del	L212I		ins214EPE			G339D	R346K	S373P	S375F				K417N	N440K		G446S		S477N	T478K	E484A
21	Released	EPI_ISL_10239121	Male	Bangkok								A67V		H69del	V70del		T95I	G142D	V143del	Y144del	Y145del							N211del	L212I		ins214EPE			G339D	R346K	S373P	S375F				K417N	N440K		G446S		S477N	T478K	E484A
22	Released	EPI_ISL_10239155	Female	Bangkok								A67V		H69del	V70del		T95I	G142D	V143del	Y144del	Y145del							N211del	L212I		ins214EPE			G339D	R346K	S373P	S375F				K417N	N440K		G446S		S477N	T478K	E484A
23	Released	EPI_ISL_10239190	Male	Bangkok								A67V		H69del	V70del		T95I	G142D	V143del	Y144del	Y145del							N211del	L212I		ins214EPE			G339D	R346K	S373P	S375F				K417N	N440K		G446S		S477N	T478K	E484A
24	Released	EPI_ISL_10239191	Female	Bangkok								A67V		H69del	V70del		T95I	G142D	V143del	Y144del	Y145del							N211del	L212I		ins214EPE			G339D	R346K	S373P	S375F				K417N	N440K		G446S		S477N	T478K	E484A
25	Released	EPI_ISL_10239276	Male	Bangkok								A67V		H69del	V70del		T95I	G142D	V143del	Y144del	Y145del							N211del	L212I		ins214EPE			G339D	R346K	S373P	S375F				K417N	N440K		G446S		S477N	T478K	E484A
26	Released	EPI_ISL_10239321	Male	Bangkok								A67V		H69del	V70del		T95I	G142D	V143del	Y144del	Y145del							N211del	L212I		ins214EPE			G339D	R346K	S373P	S375F				K417N	N440K		G446S		S477N	T478K	E484A
27	Released	EPI_ISL_10239378	Male	Bangkok								A67V		H69del	V70del		T95I	G142D	V143del	Y144del	Y145del							N211del	L212I		ins214EPE			G339D	R346K	S373P	S375F				K417N	N440K		G446S		S477N	T478K	E484A
28	Released	EPI_ISL_10239438	Female	Bangkok								A67V		H69del	V70del		T95I	G142D	V143del	Y144del	Y145del							N211del	L212I		ins214EPE			G339D	R346K	S373P	S375F				K417N	N440K		G446S		S477N	T478K	E484A
29	Released	EPI_ISL_10239439	Male	Bangkok								A67V		H69del	V70del		T95I	G142D	V143del	Y144del	Y145del							N211del	L212I		ins214EPE			G339D	R346K	S373P	S375F				K417N	N440K		G446S		S477N	T478K	E484A
30	Released	EPI_ISL_10239440	Female	Bangkok								A67V		H69del	V70del		T95I	G142D	V143del	Y144del	Y145del							N211del	L212I		ins214EPE			G339D	R346K	S373P	S375F				K417N	N440K		G446S		S477N	T478K	E484A
31	Released	EPI_ISL_10239505	Female	Bangkok								A67V		H69del	V70del		T95I	G142D	V143del	Y144del	Y145del							N211del	L212I		ins214EPE			G339D	R346K	S373P	S375F				K417N	N440K		G446S		S477N	T478K	E484A
32	Released	EPI_ISL_10239506	Female	Bangkok								A67V		H69del	V70del		T95I	G142D	V143del	Y144del	Y145del							N211del	L212I		ins214EPE			G339D	R346K	S373P	S375F				K417N	N440K		G446S		S477N	T478K	E484A
33	Released	EPI_ISL_10239655	Female	Bangkok								A67V		H69del	V70del		T95I	G142D	V143del	Y144del	Y145del							N211del	L212I		ins214EPE			G339D	R346K	S373P	S375F				K417N	N440K		G446S		S477N	T478K	E484A
34	Released	EPI_ISL_10239656	Female	Bangkok								A67V		H69del	V70del		T95I	G142D	V143del	Y144del	Y145del							N211del	L212I		ins214EPE			G339D	R346K	S373P	S375F				K417N	N440K		G446S		S477N	T478K	E484A
35	Released	EPI_ISL_10239724	Male	Bangkok								A67V		H69del	V70del		T95I	G142D	V143del	Y144del	Y145del							N211del	L212I		ins214EPE			G339D	R346K	S373P	S375F				K417N	N440K		G446S		S477N	T478K	E484A
36	Released	EPI_ISL_10282024	Male	Bangkok								A67V		H69del	V70del		T95I	G142D	V143del	Y144del	Y145del							N211del	L212I		ins214EPE			G339D		S373P	S375F				K417N	N440K		G446S		S477N	T478K	E484A
37	Released	EPI_ISL_10282086	Male	Bangkok								A67V		H69del	V70del		T95I	G142D	V143del	Y144del	Y145del							N211del	L212I		ins214EPE			G339D		S373P	S375F				K417N	N440K		G446S		S477N	T478K	E484A
38	Released	EPI_ISL_10282087	Female	Bangkok								A67V		H69del	V70del		T95I	G142D	V143del	Y144del	Y145del							N211del	L212I		ins214EPE			G339D	R346K	S373P	S375F				K417N	N440K		G446S		S477N	T478K	E484A
39	Released	EPI_ISL_10282088	Female	Bangkok								A67V		H69del	V70del		T95I	G142D	V143del	Y144del	Y145del							N211del	L212I		ins214EPE			G339D	R346K	S373P	S375F				K417N	N440K		G446S		S477N	T478K	E484A
40	Released	EPI_ISL_10282089	Female	Bangkok								A67V		H69del	V70del		T95I	G142D	V143del	Y144del	Y145del							N211del	L212I		ins214EPE			G339D		S373P	S375F				K417N	N440K		G446S		S477N	T478K	E484A
41	Released	EPI_ISL_10282090	Male	Bangkok								A67V		H69del	V70del		T95I	G142D	V143del	Y144del	Y145del							N211del	L212I		ins214EPE			G339D	R346K	S373P	S375F				K417N	N440K		G446S		S477N	T478K	E484A
42	Released	EPI_ISL_10282171	Female	Bangkok								A67V		H69del	V70del		T95I	G142D	V143del	Y144del	Y145del							N211del	L212I		ins214EPE			G339D	R346K	S373P	S375F				K417N	N440K		G446S		S477N	T478K	E484A
43	Released	EPI_ISL_10282172	Male	Bangkok								A67V		H69del	V70del		T95I	G142D	V143del	Y144del	Y145del							N211del	L212I		ins214EPE			G339D	R346K	S373P	S375F				K417N	N440K		G446S		S477N	T478K	E484A
44	Released	EPI_ISL_10282665	Male	Bangkok								A67V		H69del	V70del		T95I	G142D	V143del	Y144del	Y145del							N211del	L212I		ins214EPE			G339D		S373P	S375F				K417N	N440K		G446S		S477N	T478K	E484A
45	Released	EPI_ISL_10282666	Male	Bangkok								A67V		H69del	V70del		T95I	G142D	V143del	Y144del	Y145del							N211del	L212I		ins214EPE			G339D	R346K	S373P	S375F				K417N	N440K		G446S		S477N	T478K	E484A
46	Released	EPI_ISL_10282744	Male	Bangkok								A67V		H69del	V70del		T95I	G142D	V143del	Y144del	Y145del							N211del	L212I		ins214EPE			G339D	R346K	S373P	S375F				K417N	N440K		G446S		S477N	T478K	E484A
47	Released	EPI_ISL_10282745	Male	Bangkok								A67V		H69del	V70del		T95I	G142D	V143del	Y144del	Y145del							N211del	L212I		ins214EPE			G339D	R346K	S373P	S375F				K417N	N440K		G446S		S477N	T478K	E484A
48	Hospitalized	EPI_ISL_10411648	Male	Trat			T19I	L24del	P25del	P26del	A27S							G142D												V213G				G339D		S373P	S375F	T376A	D405N	R408S	K417N	N440K				S477N	T478K	E484A
49	Hospitalized	EPI_ISL_10411664	Female	Trat								A67V		H69del	V70del		T95I	G142D	V143del	Y144del	Y145del							N211del	L212I		ins214EPE			G339D	R346K	S373P	S375F									S477N	T478K	E484A
50	Hospitalized	EPI_ISL_10411672	Female	Trat			T19I	L24del	P25del	P26del	A27S							G142D												V213G				G339D		S373P	S375F	T376A	D405N	R408S	K417N	N440K				S477N	T478K	E484A
51	Hospitalized	EPI_ISL_10411694	Female	Trat			T19I	L24del	P25del	P26del	A27S							G142D												V213G				G339D		S373P	S375F	T376A	D405N							S477N	T478K	E484A
52	Hospitalized	EPI_ISL_10411695	Male	Trat		L5F						A67V		H69del	V70del		T95I	G142D	V143del	Y144del	Y145del							N211del	L212I		ins214EPE			G339D	R346K	S373P	S375F									S477N	T478K	E484A
53	Hospitalized	EPI_ISL_10411725	Female	Trat								A67V		H69del	V70del		T95I	G142D	V143del	Y144del	Y145del							N211del	L212I		ins214EPE			G339D		S373P	S375F									S477N	T478K	E484A
54	Hospitalized	EPI_ISL_10411732	Female	Trat			T19I	L24del	P25del	P26del	A27S							G142D												V213G				G339D		S373P	S375F	T376A	D405N	R408S	K417N	N440K				S477N	T478K	E484A
55	Hospitalized	EPI_ISL_10411778	Male	Trat			T19I	L24del	P25del	P26del	A27S							G142D												V213G				G339D		S373P	S375F	T376A	D405N	R408S	K417N	N440K				S477N	T478K	E484A
56	Hospitalized	EPI_ISL_10968663	Female	Lampang								A67V		H69del	V70del		T95I	G142D	V143del	Y144del	Y145del							N211del	L212I		ins214EPE			G339D	R346K	S373P	S375F					N440K		G446S		S477N	T478K	E484A
57	Hospitalized	EPI_ISL_10968679	Male	Lampang								A67V		H69del	V70del		T95I	G142D	V143del	Y144del	Y145del							N211del	L212I		ins214EPE			G339D	R346K	S373P	S375F				K417N	N440K		G446S		S477N	T478K	E484A
58	Hospitalized	EPI_ISL_10968685	Male	Chiang Mai								A67V		H69del	V70del		T95I	G142D	V143del	Y144del	Y145del							N211del	L212I		ins214EPE			G339D	R346K	S373P	S375F									S477N	T478K	E484A
59	Hospitalized	EPI_ISL_10968695	Male	Lampang								A67V		H69del	V70del		T95I	G142D	V143del	Y144del	Y145del							N211del	L212I		ins214EPE			G339D	R346K	S373P	S375F				K417N	N440K		G446S		S477N	T478K	E484A
60	Hospitalized	EPI_ISL_10968709	Male	Lampang								A67V		H69del	V70del		T95I	G142D	V143del	Y144del	Y145del							N211del	L212I		ins214EPE			G339D	R346K	S373P	S375F									S477N	T478K	E484A
61	Hospitalized	EPI_ISL_10968715	Female	Lampang								A67V		H69del	V70del		T95I	G142D	V143del	Y144del	Y145del							N211del	L212I		ins214EPE			G339D	R346K	S373P	S375F				K417N	N440K		G446S		S477N	T478K	E484A
62	Hospitalized	EPI_ISL_10968716	Female	Chiang Mai								A67V		H69del	V70del		T95I	G142D	V143del	Y144del	Y145del							N211del	L212I		ins214EPE			G339D	R346K	S373P	S375F				K417N	N440K		G446S		S477N	T478K	E484A
63	Hospitalized	EPI_ISL_10968723	Female	Lampang								A67V		H69del	V70del		T95I	G142D	V143del	Y144del	Y145del							N211del	L212I		ins214EPE			G339D	R346K	S373P	S375F				K417N	N440K		G446S		S477N	T478K	E484A
64	Hospitalized	EPI_ISL_10968731	Female	Lampang								A67V		H69del	V70del		T95I	G142D	V143del	Y144del	Y145del							N211del	L212I		ins214EPE			G339D	R346K	S373P	S375F				K417N	N440K		G446S		S477N	T478K	E484A
65	Hospitalized	EPI_ISL_10968734	Female	Lampang								A67V		H69del	V70del		T95I	G142D	V143del	Y144del	Y145del							N211del	L212I		ins214EPE			G339D	R346K	S373P	S375F				K417N	N440K		G446S		S477N	T478K	E484A
66	Hospitalized	EPI_ISL_10968740	Female	Chiang Mai			T19I	L24del	P25del	P26del	A27S							G142D												V213G				G339D		S373P	S375F	T376A	D405N	R408S	K417N	N440K				S477N	T478K	E484A
67	Hospitalized	EPI_ISL_10968746	Male	Chiang Mai								A67V		H69del	V70del		T95I	G142D	V143del	Y144del	Y145del							N211del	L212I		ins214EPE			G339D		S373P	S375F									S477N	T478K	E484A
68	Hospitalized	EPI_ISL_10968750	Female	Lampang								A67V		H69del	V70del		T95I	G142D	V143del	Y144del	Y145del							N211del	L212I		ins214EPE			G339D	R346K	S373P	S375F				K417N	N440K		G446S		S477N	T478K	E484A
69	Deceased	EPI_ISL_10968774	Female	Chiang Mai								A67V		H69del	V70del		T95I	G142D	V143del	Y144del	Y145del							N211del	L212I		ins214EPE			G339D	R346K	S373P	S375F									S477N	T478K	E484A
70	Hospitalized	EPI_ISL_10968781	Female	Lampang								A67V		H69del	V70del		T95I	G142D	V143del	Y144del	Y145del							N211del	L212I		ins214EPE			G339D	R346K	S373P	S375F									S477N	T478K	E484A
71	Hospitalized	EPI_ISL_10968790	Male	Chiang Mai								A67V		H69del	V70del		T95I	G142D	V143del	Y144del	Y145del							N211del	L212I		ins214EPE			G339D		S373P	S375F									S477N	T478K	E484A
72	Hospitalized	EPI_ISL_10968797	Male	Chiang Mai								A67V		H69del	V70del		T95I	G142D	V143del	Y144del	Y145del							N211del	L212I		ins214EPE			G339D	R346K	S373P	S375F				K417N	N440K		G446S		S477N	T478K	E484A
73	Hospitalized	EPI_ISL_10968805	Female	Lampang								A67V		H69del	V70del		T95I	G142D	V143del	Y144del	Y145del							N211del	L212I		ins214EPE			G339D	R346K	S373P	S375F									S477N	T478K	E484A
74	Hospitalized	EPI_ISL_10968813	Female	Lampang								A67V		H69del	V70del		T95I	G142D	V143del	Y144del	Y145del							N211del	L212I		ins214EPE			G339D	R346K	S373P	S375F									S477N	T478K	E484A
75	Hospitalized	EPI_ISL_10968814	Female	Chiang Mai								A67V		H69del	V70del		T95I	G142D	V143del	Y144del	Y145del							N211del	L212I		ins214EPE			G339D		S373P	S375F									S477N	T478K	E484A
76	Hospitalized	EPI_ISL_10968829	Female	Chiang Mai								A67V		H69del	V70del		T95I	G142D	V143del	Y144del	Y145del							N211del	L212I		ins214EPE			G339D		S373P	S375F									S477N	T478K	E484A
77	Hospitalized	EPI_ISL_10968835	Female	Lampang			T19I	L24del	P25del	P26del	A27S							G142D												V213G				G339D		S373P	S375F	T376A	D405N	R408S	K417N	N440K				S477N	T478K	E484A
78	Hospitalized	EPI_ISL_11179246	Female	Prachinburi								A67V		H69del	V70del		T95I	G142D	V143del	Y144del	Y145del							N211del	L212I		ins214EPE			G339D	R346K	S373P	S375F									S477N	T478K	E484A
79	Hospitalized	EPI_ISL_11179251	Female	Prachinburi								A67V		H69del	V70del		T95I	G142D	V143del	Y144del	Y145del							N211del	L212I		ins214EPE			G339D	R346K	S373P	S375F									S477N	T478K	E484A
80	Hospitalized	EPI_ISL_11179264	Male	Prachinburi			T19I	L24del	P25del	P26del	A27S							G142D												V213G				G339D		S373P	S375F	T376A								S477N	T478K	E484A
81	Hospitalized	EPI_ISL_11179272	Male	Prachinburi								A67V		H69del	V70del		T95I	G142D	V143del	Y144del	Y145del							N211del	L212I		ins214EPE			G339D	R346K	S373P	S375F									S477N	T478K	E484A
82	Hospitalized	EPI_ISL_11179276	Female	Prachinburi			T19I	L24del	P25del	P26del	A27S							G142D												V213G				G339D		S373P	S375F	T376A	D405N							S477N	T478K	E484A
83	Hospitalized	EPI_ISL_11179282	Female	Prachinburi			T19I	L24del	P25del	P26del	A27S							G142D												V213G				G339D		S373P	S375F	T376A	D405N	R408S	K417N	N440K				S477N	T478K	E484A
84	Hospitalized	EPI_ISL_11179283	Male	Prachinburi			T19I	L24del	P25del	P26del	A27S							G142D												V213G				G339D		S373P	S375F	T376A	D405N	R408S	K417N	N440K				S477N	T478K	E484A
85	Deceased	EPI_ISL_11179518	Male	Samut Prakan			T19I	L24del	P25del	P26del	A27S							G142D												V213G				G339D		S373P	S375F	T376A	D405N		K417N	N440K				S477N	T478K	E484A
86	Hospitalized	EPI_ISL_11179534	Male	Prachinburi								A67V		H69del	V70del		T95I	G142D	V143del	Y144del	Y145del							N211del	L212I		ins214EPE			G339D	R346K	S373P	S375F				K417N	N440K		G446S		S477N	T478K	E484A
87	Hospitalized	EPI_ISL_11179562	Male	Trat			T19I	L24del	P25del	P26del	A27S							G142D												V213G				G339D		S373P	S375F	T376A	D405N	R408S	K417N	N440K				S477N	T478K	E484A
88	Hospitalized	EPI_ISL_11413919	Male	Amnat Charoen								A67V		H69del	V70del		T95I	G142D	V143del	Y144del	Y145del							N211del	L212I		ins214EPE			G339D	R346K	S373P	S375F									S477N	T478K	E484A
89	Hospitalized	EPI_ISL_11414010	Male	Ubon Ratchathani								A67V		H69del	V70del		T95I	G142D	V143del	Y144del	Y145del							N211del	L212I		ins214EPE			G339D	R346K	S373P	S375F				K417N					S477N	T478K	E484A
90	Hospitalized	EPI_ISL_11414069	Female	Ubon Ratchathani			T19I	L24del	P25del	P26del	A27S							G142D												V213G				G339D		S373P	S375F	T376A	D405N	R408S	K417N	N440K				S477N	T478K	E484A
91	Death	EPI_ISL_11441958	Female	Lampang								A67V		H69del	V70del		T95I	G142D	V143del	Y144del	Y145del							N211del	L212I		ins214EPE			G339D	R346K	S373P	S375F									S477N	T478K	E484A
92	Death	EPI_ISL_11442093	Female	Chiang Rai								A67V		H69del	V70del		T95I	G142D	V143del	Y144del	Y145del							N211del	L212I		ins214EPE			G339D	R346K	S373P	S375F				K417N	N440K		G446S		S477N	T478K	E484A
93	Death	EPI_ISL_11442115	Male	Nonthaburi								A67V		H69del	V70del		T95I	G142D	V143del	Y144del	Y145del							N211del	L212I		ins214EPE			G339D	R346K	S373P	S375F									S477N	T478K	E484A
94	Released	EPI_ISL_11698090	Male	Bangkok			T19I	L24del	P25del	P26del	A27S							G142D												V213G				G339D		S373P	S375F	T376A	D405N	R408S	K417N	N440K				S477N	T478K	E484A
95	Released	EPI_ISL_11698091	Male	Bangkok			T19I	L24del	P25del	P26del	A27S							G142D												V213G				G339D		S373P	S375F	T376A	D405N	R408S	K417N	N440K				S477N	T478K	E484A
96	Released	EPI_ISL_11698092	Female	Bangkok			T19I	L24del	P25del	P26del	A27S							G142D												V213G				G339D		S373P	S375F	T376A	D405N	R408S	K417N	N440K				S477N	T478K	E484A
97	Released	EPI_ISL_11698093	Male	Bangkok			T19I	L24del	P25del	P26del	A27S							G142D												V213G				G339D		S373P	S375F	T376A	D405N	R408S	K417N	N440K				S477N	T478K	E484A
98	Released	EPI_ISL_11698094	Female	Bangkok			T19I	L24del	P25del	P26del	A27S							G142D												V213G				G339D		S373P	S375F	T376A	D405N	R408S	K417N	N440K				S477N	T478K	E484A
99	Released	EPI_ISL_11698095	Female	Bangkok			T19I	L24del	P25del	P26del	A27S							G142D												V213G				G339D		S373P	S375F	T376A	D405N	R408S	K417N	N440K				S477N	T478K	E484A
100	Released	EPI_ISL_11698096	Female	Bangkok			T19I	L24del	P25del	P26del	A27S							G142D												V213G				G339D		S373P	S375F	T376A	D405N	R408S	K417N	N440K				S477N	T478K	E484A
101	Released	EPI_ISL_11698097	Male	Bangkok			T19I	L24del	P25del	P26del	A27S							G142D												V213G				G339D		S373P	S375F	T376A	D405N	R408S	K417N	N440K				S477N	T478K	E484A
102	Released	EPI_ISL_11698098	Male	Bangkok			T19I	L24del	P25del	P26del	A27S							G142D												V213G				G339D		S373P	S375F	T376A	D405N	R408S	K417N	N440K				S477N	T478K	E484A
103	Released	EPI_ISL_11698099	Male	Bangkok			T19I	L24del	P25del	P26del	A27S							G142D												V213G				G339D		S373P	S375F	T376A	D405N	R408S	K417N	N440K				S477N	T478K	E484A
104	Released	EPI_ISL_11698100	Male	Bangkok			T19I	L24del	P25del	P26del	A27S							G142D												V213G				G339D		S373P	S375F	T376A	D405N	R408S	K417N	N440K				S477N	T478K	E484A
105	Released	EPI_ISL_11698101	Male	Bangkok			T19I	L24del	P25del	P26del	A27S							G142D												V213G				G339D		S373P	S375F	T376A	D405N	R408S	K417N	N440K				S477N	T478K	E484A
106	Released	EPI_ISL_11698102	Male	Bangkok			T19I	L24del	P25del	P26del	A27S							G142D												V213G				G339D		S373P	S375F	T376A	D405N	R408S	K417N	N440K				S477N	T478K	E484A
107	Released	EPI_ISL_11698103	Male	Bangkok			T19I	L24del	P25del	P26del	A27S							G142D												V213G				G339D		S373P	S375F	T376A	D405N	R408S	K417N	N440K				S477N	T478K	E484A
108	Released	EPI_ISL_11698104	Female	Bangkok			T19I	L24del	P25del	P26del	A27S							G142D												V213G				G339D		S373P	S375F	T376A	D405N	R408S	K417N	N440K				S477N	T478K	E484A
109	Released	EPI_ISL_11698105	Male	Bangkok			T19I	L24del	P25del	P26del	A27S							G142D												V213G				G339D		S373P	S375F	T376A	D405N	R408S	K417N	N440K				S477N	T478K	E484A
110	Released	EPI_ISL_11698106	Male	Bangkok			T19I	L24del	P25del	P26del	A27S							G142D												V213G				G339D		S373P	S375F	T376A	D405N	R408S	K417N	N440K				S477N	T478K	E484A
111	Released	EPI_ISL_11698107	Female	Bangkok			T19I	L24del	P25del	P26del	A27S							G142D												V213G				G339D		S373P	S375F	T376A	D405N	R408S	K417N	N440K				S477N	T478K	E484A
112	Released	EPI_ISL_11698108	Male	Bangkok			T19I	L24del	P25del	P26del	A27S							G142D												V213G				G339D		S373P	S375F	T376A	D405N	R408S	K417N	N440K				S477N	T478K	E484A
113	Released	EPI_ISL_11698109	Male	Bangkok			T19I	L24del	P25del	P26del	A27S							G142D												V213G				G339D		S373P	S375F	T376A	D405N	R408S	K417N	N440K				S477N	T478K	E484A
114	Released	EPI_ISL_11698110	Female	Bangkok			T19I	L24del	P25del	P26del	A27S							G142D												V213G				G339D		S373P	S375F	T376A	D405N	R408S	K417N	N440K				S477N	T478K	E484A
115	Released	EPI_ISL_11698112	Female	Bangkok			T19I	L24del	P25del	P26del	A27S							G142D												V213G				G339D		S373P	S375F	T376A	D405N	R408S	K417N	N440K				S477N	T478K	E484A
116	Released	EPI_ISL_11698114	Female	Bangkok			T19I	L24del	P25del	P26del	A27S							G142D												V213G				G339D		S373P	S375F	T376A	D405N	R408S	K417N	N440K				S477N	T478K	E484A
117	Released	EPI_ISL_11711750	Male	Bangkok			T19I	L24del	P25del	P26del	A27S							G142D												V213G				G339D		S373P	S375F	T376A	D405N	R408S	K417N	N440K				S477N	T478K	E484A
118	Released	EPI_ISL_11711931	Male	Bangkok			T19I	L24del	P25del	P26del	A27S							G142D												V213G				G339D		S373P	S375F	T376A	D405N	R408S	K417N	N440K				S477N	T478K	E484A
119	Released	EPI_ISL_11712097	Female	Bangkok			T19I	L24del	P25del	P26del	A27S							G142D												V213G				G339D		S373P	S375F	T376A	D405N	R408S	K417N	N440K				S477N	T478K	E484A
120	Released	EPI_ISL_11713775	Female	Bangkok			T19I	L24del	P25del	P26del	A27S							G142D												V213G				G339D		S373P	S375F	T376A	D405N	R408S	K417N	N440K				S477N	T478K	E484A
121	Released	EPI_ISL_11714002	Female	Bangkok			T19I	L24del	P25del	P26del	A27S							G142D												V213G				G339D		S373P	S375F	T376A	D405N	R408S	K417N	N440K				S477N	T478K	E484A
122	Released	EPI_ISL_11714167	Female	Bangkok			T19I	L24del	P25del	P26del	A27S							G142D												V213G				G339D		S373P	S375F	T376A	D405N	R408S	K417N	N440K				S477N	T478K	E484A
123	Released	EPI_ISL_11714580	Male	Bangkok			T19I	L24del	P25del	P26del	A27S							G142D												V213G				G339D		S373P	S375F	T376A	D405N	R408S	K417N	N440K				S477N	T478K	E484A
124	Deceased	EPI_ISL_11738980	Male	Trang								A67V		H69del	V70del		T95I	G142D	V143del	Y144del	Y145del		F157del	R158del
125	Deceased	EPI_ISL_11753520	Female	Trang								A67V		H69del	V70del		T95I	G142D	V143del	Y144del	Y145del							N211del	L212I		ins214EPE			G339D		S373P	S375F									S477N	T478K	E484A
126	Deceased	EPI_ISL_11753522	Male	Trang			T19I	L24del	P25del	P26del	A27S							G142D												V213G				G339D		S373P	S375F									S477N	T478K	E484A
127	Deceased	EPI_ISL_11754783	Female	Samut Prakan								A67V		H69del	V70del		T95I	G142D	V143del	Y144del	Y145del															S373P	S375F	T376A	D405N	R408S	K417N
128	Deceased	EPI_ISL_11754785	Female	Lamphun								A67V		H69del	V70del		T95I	G142D	V143del	Y144del	Y145del
129	Deceased	EPI_ISL_11871257	unknown	Samut Prakan			T19I	L24del	P25del	P26del	A27S							G142D												V213G				G339D		S373P	S375F	T376A	D405N		K417N					S477N	T478K	E484A
130	Death	EPI_ISL_12139994	Male	Phrae			T19I	L24del	P25del	P26del	A27S							G142D												V213G				G339D		S373P	S375F	T376A	D405N	R408S	K417N					S477N	T478K	E484A
131	Death	EPI_ISL_12141415	Female	Trang			T19I	L24del	P25del	P26del	A27S							G142D												V213G				G339D		S373P	S375F	T376A	D405N	R408S	K417N	N440K				S477N	T478K	E484A
132	Death	EPI_ISL_12141418	Female	Trang								A67V		H69del	V70del		T95I	G142D	V143del	Y144del	Y145del							N211del	L212I		ins214EPE			G339D	R346K	S373P	S375F				K417N	N440K		G446S		S477N	T478K	E484A
133	Death	EPI_ISL_12141445	Male	Chon Buri			T19I	L24del	P25del	P26del	A27S							G142D												V213G				G339D		S373P	S375F	T376A	D405N	R408S	K417N	N440K				S477N	T478K	E484A
134	Deceased	EPI_ISL_12143830	Male	Trang			T19I	L24del	P25del	P26del	A27S	A67V		H69del	V70del		T95I	G142D												V213G																		E484A
135	Released	EPI_ISL_12176266	Female	Bangkok								A67V		H69del	V70del		T95I	G142D	V143del	Y144del	Y145del							N211del	L212I		ins214EPE			G339D	R346K	S373P	S375F				K417N	N440K		G446S		S477N	T478K	E484A
136	Released	EPI_ISL_12176267	Male	Bangkok								A67V		H69del	V70del		T95I	G142D	V143del	Y144del	Y145del							N211del	L212I		ins214EPE			G339D		S373P	S375F				K417N	N440K		G446S		S477N	T478K	E484A
137	Released	EPI_ISL_12176268	Male	Bangkok								A67V		H69del	V70del		T95I	G142D	V143del	Y144del	Y145del							N211del	L212I		ins214EPE			G339D	R346K	S373P	S375F				K417N	N440K		G446S		S477N	T478K	E484A
138	Released	EPI_ISL_12176269	Female	Bangkok								A67V		H69del	V70del		T95I	G142D	V143del	Y144del	Y145del							N211del	L212I		ins214EPE			G339D		S373P	S375F				K417N	N440K		G446S		S477N	T478K	E484A
139	Released	EPI_ISL_12176324	Male	Bangkok								A67V		H69del	V70del		T95I	G142D	V143del	Y144del	Y145del							N211del	L212I		ins214EPE			G339D	R346K	S373P	S375F				K417N	N440K		G446S		S477N	T478K	E484A
140	Death	EPI_ISL_12290967	Male	Chiang Rai			T19I	L24del	P25del	P26del	A27S							G142D												V213G				G339D		S373P	S375F	T376A	D405N	R408S	K417N	N440K				S477N	T478K	E484A
141	Death	EPI_ISL_12290969	Female	Chiang Rai			T19I	L24del	P25del	P26del	A27S							G142D												V213G				G339D		S373P	S375F	T376A	D405N	R408S	K417N	N440K				S477N	T478K	E484A
142	Released	EPI_ISL_12387073	Male	Bangkok								A67V		H69del	V70del		T95I	G142D	V143del	Y144del	Y145del							N211del	L212I		ins214EPE			G339D		S373P	S375F				K417N	N440K		G446S		S477N	T478K	E484A
143	Released	EPI_ISL_12394871	Male	Bangkok								A67V		H69del	V70del		T95I	G142D	V143del	Y144del	Y145del							N211del	L212I		ins214EPE			G339D	R346K	S373P	S375F				K417N	N440K		G446S		S477N	T478K	E484A
144	Released	EPI_ISL_12394872	Male	Bangkok								A67V		H69del	V70del		T95I	G142D	V143del	Y144del	Y145del							N211del	L212I		ins214EPE			G339D	R346K	S373P	S375F				K417N	N440K		G446S		S477N	T478K	E484A
145	Released	EPI_ISL_12394873	Male	Bangkok								A67V		H69del	V70del		T95I	G142D	V143del	Y144del	Y145del				T167S			N211del	L212I		ins214EPE			G339D	R346K	S373P	S375F				K417N	N440K		G446S		S477N	T478K	E484A
146	Released	EPI_ISL_12394964	Female	Bangkok								A67V		H69del	V70del		T95I	G142D	V143del	Y144del	Y145del				T167S			N211del	L212I		ins214EPE			G339D	R346K	S373P	S375F				K417N	N440K		G446S		S477N	T478K	E484A
147	Released	EPI_ISL_12394973	Female	Bangkok			T19I	L24del	P25del	P26del	A27S							G142D												V213G				G339D		S373P	S375F	T376A	D405N	R408S	K417N	N440K				S477N	T478K	E484A
148	Released	EPI_ISL_12394981	Male	Bangkok			T19I	L24del	P25del	P26del	A27S							G142D												V213G				G339D		S373P	S375F	T376A	D405N	R408S	K417N	N440K				S477N	T478K	E484A
149	Released	EPI_ISL_12394982	Male	Bangkok			T19I	L24del	P25del	P26del	A27S							G142D												V213G				G339D		S373P	S375F	T376A	D405N	R408S	K417N	N440K				S477N	T478K	E484A
150	Released	EPI_ISL_12394983	Female	Bangkok			T19I	L24del	P25del	P26del	A27S							G142D								Q183H				V213G				G339D		S373P	S375F	T376A	D405N	R408S	K417N	N440K				S477N	T478K	E484A
151	Released	EPI_ISL_12394996	Male	Bangkok			T19I	L24del	P25del	P26del	A27S							G142D												V213G				G339D		S373P	S375F	T376A	D405N	R408S	K417N	N440K				S477N	T478K	E484A
152	Released	EPI_ISL_12395008	Female	Bangkok			T19I	L24del	P25del	P26del	A27S							G142D												V213G				G339D		S373P	S375F	T376A	D405N	R408S	K417N	N440K				S477N	T478K	E484A
153	Released	EPI_ISL_12395018	Female	Bangkok			T19I	L24del	P25del	P26del	A27S							G142D												V213G				G339D		S373P	S375F	T376A	D405N	R408S	K417N	N440K				S477N	T478K	E484A
154	Released	EPI_ISL_12395049	Male	Bangkok			T19I	L24del	P25del	P26del	A27S							G142D												V213G				G339D		S373P	S375F	T376A	D405N	R408S	K417N	N440K				S477N	T478K	E484A
155	Death	EPI_ISL_12473749	Female	Chiang Mai			T19I	L24del	P25del	P26del	A27S							G142D												V213G				G339D		S373P	S375F	T376A	D405N	R408S	K417N	N440K				S477N	T478K	E484A
156	Death	EPI_ISL_12473750	Male	Chiang Mai			T19I	L24del	P25del	P26del	A27S							G142D												V213G				G339D		S373P	S375F	T376A	D405N	R408S	K417N	N440K				S477N	T478K	E484A
157	Death	EPI_ISL_12473751	Female	Chiang Mai			T19I	L24del	P25del	P26del	A27S							G142D												V213G				G339D		S373P	S375F	T376A	D405N	R408S	K417N	N440K				S477N	T478K	E484A
158	Deceased	EPI_ISL_12476408	Male	Bangkok			T19I	L24del	P25del	P26del	A27S							G142D												V213G				G339D		S373P	S375F	T376A	D405N	R408S	K417N					S477N	T478K	E484A
159	Deceased	EPI_ISL_12651346	Female	Samut Prakan								A67V		H69del	V70del		T95I	G142D	V143del	Y144del	Y145del							N211del	L212I		ins214EPE			G339D	R346K	S373P	S375F									S477N	T478K	E484A
160	Deceased	EPI_ISL_12651353	Male	Samut Prakan			T19I	L24del	P25del	P26del	A27S							G142D												V213G				G339D		S373P	S375F	T376A	D405N	R408S	K417N	N440K				S477N	T478K	E484A
161	Death	EPI_ISL_12727219	Male	Lamphun			T19I	L24del	P25del	P26del	A27S							G142D												V213G				G339D		S373P	S375F	T376A								S477N	T478K	E484A
162	Death	EPI_ISL_12727585	Female	Chiang Rai			T19I	L24del	P25del	P26del	A27S							G142D												V213G				G339D		S373P	S375F	T376A	D405N	R408S	K417N	N440K				S477N	T478K	E484A
163	Death	EPI_ISL_12727587	Male	Chiang Rai								A67V		H69del	V70del		T95I	G142D	V143del	Y144del	Y145del							N211del	L212I		ins214EPE			G339D	R346K	S373P	S375F									S477N	T478K	E484A
164	Death	EPI_ISL_12727588	Male	Chiang Rai			T19I	L24del	P25del	P26del	A27S							G142D												V213G				G339D		S373P	S375F	T376A	D405N	R408S	K417N	N440K				S477N	T478K	E484A
165	Death	EPI_ISL_12727590	Male	Chiang Rai			T19I	L24del	P25del	P26del	A27S							G142D												V213G				G339D		S373P	S375F	T376A	D405N	R408S	K417N	N440K				S477N	T478K	E484A
166	Death	EPI_ISL_12727591	Female	Chiang Rai			T19I	L24del	P25del	P26del	A27S							G142D												V213G				G339D		S373P	S375F	T376A								S477N	T478K	E484A
167	Death	EPI_ISL_12727592	Male	Chiang Rai			T19I	L24del	P25del	P26del	A27S							G142D												V213G																S477N	T478K	E484A
168	Death	EPI_ISL_12727593	Female	Chiang Rai			T19I	L24del	P25del	P26del	A27S							G142D												V213G				G339D		S373P	S375F	T376A	D405N	R408S	K417N	N440K				S477N	T478K	E484A
169	Deceased	EPI_ISL_12738967	Male	Lamphun			T19I	L24del	P25del	P26del	A27S							G142D												V213G																S477N	T478K	E484A
170	Deceased	EPI_ISL_12839423	Male	Trat			T19I	L24del	P25del	P26del	A27S							G142D												V213G				G339D		S373P	S375F	T376A	D405N							S477N	T478K	E484A
171	Deceased	EPI_ISL_12839436	Male	Chon Buri			T19I	L24del	P25del	P26del	A27S							G142D												V213G				G339D		S373P	S375F	T376A	D405N			N440K				S477N	T478K	E484A
172	Deceased	EPI_ISL_12839460	Male	Samut Prakan			T19I	L24del	P25del	P26del	A27S							G142D									Y200H			V213G				G339D		S373P	S375F	T376A	D405N							S477N	T478K	E484A
173	Death	EPI_ISL_12861835	Male	Trang			T19I	L24del	P25del	P26del	A27S							G142D												V213G																S477N	T478K	E484A
174	Deceased	EPI_ISL_13158832	Female	Chiang Mai			T19I	L24del	P25del	P26del	A27S							G142D												V213G				G339D		S373P	S375F	T376A	D405N	R408S	K417N	N440K				S477N	T478K	E484A
175	Deceased	EPI_ISL_13207871	Male	Chon Buri			T19I					A67V		H69del	V70del		T95I	G142D	V143del	Y144del	Y145del							N211del	L212I		ins214EPE			G339D	R346K	S373P	S375F									S477N	T478K	E484A
176	Hospitalized	EPI_ISL_13835424	Male	Bangkok			T19I	L24del	P25del	P26del	A27S							G142D												V213G				G339D		S373P	S375F	T376A	D405N	R408S	K417N	N440K				S477N	T478K	E484A
177	Deceased	EPI_ISL_14302528	Male	Phuket			T19I	L24del	P25del	P26del	A27S			H69del	V70del			G142D												V213G				G339D		S373P	S375F	T376A	D405N	R408S	K417N	N440K			L452R	S477N	T478K	E484A	F486V
178	Deceased	EPI_ISL_14302545	Female	Nakhon Sawan			T19I	L24del	P25del	P26del	A27S							G142D												V213G				G339D		S373P	S375F	T376A	D405N	R408S	K417N					S477N	T478K	E484A
179	Deceased	EPI_ISL_14438264	Male	Bangkok			T19I	L24del	P25del	P26del	A27S			H69del	V70del			G142D												V213G				G339D		S373P	S375F	T376A	D405N		K417N	N440K			L452R	S477N	T478K	E484A	F486V
180	Deceased	EPI_ISL_14438301	Male	Bangkok			T19I	L24del	P25del	P26del	A27S			H69del	V70del			G142D												V213G				G339D		S373P	S375F	T376A	D405N	R408S	K417N	N440K			L452R	S477N	T478K	E484A	F486V
181	Deceased	EPI_ISL_14438306	Male	Bangkok			T19I	L24del	P25del	P26del	A27S			H69del	V70del			G142D												V213G				G339D		S373P	S375F	T376A	D405N	R408S	K417N	N440K			L452R	S477N	T478K	E484A	F486V
182	Deceased	EPI_ISL_14438307	Female	Bangkok			T19I	L24del	P25del	P26del	A27S			H69del	V70del			G142D												V213G				G339D		S373P	S375F	T376A	D405N	R408S	K417N	N440K			L452R	S477N	T478K	E484A	F486V
183	Deceased	EPI_ISL_14438309	Female	Bangkok			T19I	L24del	P25del	P26del	A27S			H69del	V70del			G142D												V213G				G339D		S373P	S375F	T376A	D405N							S477N	T478K	E484A	F486V
184	Deceased	EPI_ISL_14438310	Female	Bangkok			T19I	L24del	P25del	P26del	A27S			H69del	V70del			G142D												V213G				G339D		S373P	S375F	T376A	D405N	R408S	K417N	N440K			L452R	S477N	T478K	E484A	F486V
185	Deceased	EPI_ISL_14438311	Male	Bangkok			T19I	L24del	P25del	P26del	A27S			H69del	V70del			G142D												V213G				G339D		S373P	S375F	T376A	D405N	R408S	K417N	N440K			L452R	S477N	T478K	E484A	F486V
186	Deceased	EPI_ISL_14438413	Male	Bangkok			T19I	L24del	P25del	P26del	A27S			H69del	V70del			G142D												V213G				G339D		S373P	S375F	T376A	D405N	R408S	K417N	N440K			L452R	S477N	T478K	E484A	F486V
187	Deceased	EPI_ISL_14438416	Male	Bangkok			T19I	L24del	P25del	P26del	A27S							G142D				W152L								V213G				G339D		S373P	S375F	T376A	D405N	R408S						S477N	T478K	E484A
188	Deceased	EPI_ISL_14438417	Female	Bangkok			T19I	L24del	P25del	P26del	A27S			H69del	V70del			G142D												V213G				G339D		S373P	S375F	T376A	D405N	R408S	K417N	N440K			L452R	S477N	T478K	E484A	F486V
189	Deceased	EPI_ISL_14438461	Female	Bangkok			T19I	L24del	P25del	P26del	A27S			H69del	V70del			G142D												V213G				G339D		S373P	S375F	T376A	D405N	R408S	K417N	N440K			L452R	S477N	T478K	E484A	F486V
190	Deceased	EPI_ISL_14438464	Female	Chon Buri			T19I	L24del	P25del	P26del	A27S			H69del	V70del			G142D												V213G				G339D		S373P	S375F	T376A	D405N	R408S						S477N	T478K	E484A	F486V
191	Deceased	EPI_ISL_14438465	Male	Chon Buri			T19I	L24del	P25del	P26del	A27S			H69del	V70del			G142D												V213G				G339D		S373P	S375F	T376A	D405N	R408S	K417N	N440K			L452R	S477N	T478K	E484A	F486V
192	Deceased	EPI_ISL_14438548	Female	Chon Buri			T19I	L24del	P25del	P26del	A27S			H69del	V70del			G142D												V213G				G339D		S373P	S375F	T376A	D405N	R408S	K417N	N440K			L452R	S477N	T478K	E484A	F486V
193	Deceased	EPI_ISL_14438549	Male	Chon Buri			T19I	L24del	P25del	P26del	A27S			H69del	V70del			G142D												V213G				G339D		S373P	S375F	T376A	D405N	R408S	K417N	N440K			L452R	S477N	T478K	E484A	F486V
194	Deceased	EPI_ISL_14438557	Female	Chon Buri			T19I	L24del	P25del	P26del	A27S			H69del	V70del			G142D												V213G				G339D		S373P	S375F	T376A	D405N	R408S	K417N	N440K			L452R	S477N	T478K	E484A	F486V
195	Deceased	EPI_ISL_14438558	Female	Chon Buri	V3G		T19I	L24del	P25del	P26del	A27S			H69del	V70del			G142D												V213G				G339D		S373P	S375F	T376A	D405N	R408S	K417N	N440K			L452R	S477N	T478K	E484A	F486V
196	Deceased	EPI_ISL_14438559	Male	Chon Buri			T19I	L24del	P25del	P26del	A27S			H69del	V70del			G142D												V213G				G339D		S373P	S375F	T376A	D405N	R408S	K417N	N440K			L452R	S477N	T478K	E484A	F486V
197	Deceased	EPI_ISL_14438563	Male	Chon Buri			T19I	L24del	P25del	P26del	A27S							G142D												V213G																S477N	T478K	E484A	F486V
198	Deceased	EPI_ISL_14438566	Female	Chon Buri			T19I	L24del	P25del	P26del	A27S			H69del	V70del			G142D												V213G				G339D		S373P	S375F	T376A	D405N	R408S	K417N	N440K			L452R	S477N	T478K	E484A	F486V
199	Deceased	EPI_ISL_14438568	Male	Chon Buri			T19I	L24del	P25del	P26del	A27S			H69del	V70del			G142D												V213G				G339D		S373P	S375F	T376A	D405N		K417N	N440K			L452R	S477N	T478K	E484A	F486V
200	Deceased	EPI_ISL_14438569	Male	Chon Buri			T19I	L24del	P25del	P26del	A27S			H69del	V70del			G142D												V213G				G339D		S373P	S375F	T376A	D405N	R408S	K417N	N440K			L452R	S477N	T478K	E484A	F486V
201	Deceased	EPI_ISL_14438570	Male	Samut Prakan			T19I	L24del	P25del	P26del	A27S							G142D												V213G				G339D		S373P	S375F	T376A	D405N							S477N	T478K	E484A
202	Deceased	EPI_ISL_14438598	Female	Samut Prakan			T19I	L24del	P25del	P26del	A27S			H69del	V70del			G142D												V213G				G339D		S373P	S375F	T376A	D405N	R408S	K417N	N440K			L452R	S477N	T478K	E484A	F486V
203	Deceased	EPI_ISL_14438599	Male	Samut Prakan			T19I	L24del	P25del	P26del	A27S			H69del	V70del			G142D												V213G				G339D		S373P	S375F	T376A	D405N	R408S	K417N	N440K			L452R	S477N	T478K	E484A	F486V
204	Death	EPI_ISL_14725597	Male	Phrae			T19I	L24del	P25del	P26del	A27S			H69del	V70del															V213G				G339D		S373P	S375F	T376A	D405N	R408S	K417N				L452R	S477N	T478K	E484A	F486V
205	Death	EPI_ISL_14810409	Female	Bangkok			T19I	L24del	P25del	P26del	A27S			H69del	V70del			G142D		Y144del										V213G				G339D		S373P	S375F	T376A	D405N	R408S	K417N	N440K			L452R	S477N	T478K	E484A	F486V
206	Deceased	EPI_ISL_15015285	Male	Chon Buri			T19I	L24del	P25del	P26del	A27S			H69del	V70del			G142D												V213G				G339D		S373P	S375F	T376A	D405N							S477N	T478K	E484A	F486V
207	Deceased	EPI_ISL_15015290	Male	Samut Prakan			T19I	L24del	P25del	P26del	A27S			H69del	V70del			G142D												V213G				G339D		S373P	S375F	T376A	D405N	R408S	K417N	N440K				S477N	T478K	E484A	F486V
208	Deceased	EPI_ISL_15015297	Female	Chon Buri			T19I	L24del	P25del	P26del	A27S			H69del	V70del			G142D												V213G				G339D		S373P	S375F	T376A	D405N	R408S						S477N	T478K	E484A	F486V
209	Deceased	EPI_ISL_15015327	Female	Samut Prakan	V3G		T19I	L24del	P25del	P26del	A27S				V70del	S71del		G142D												V213G				G339D		S373P	S375F	T376A	D405N						L452R	S477N	T478K	E484A	F486V
210	Deceased	EPI_ISL_15015328	Male	Chon Buri			T19I	L24del	P25del	P26del	A27S			H69del	V70del			G142D												V213G				G339D		S373P	S375F	T376A	D405N		K417N	N440K			L452R	S477N	T478K	E484A	F486V
211	Deceased	EPI_ISL_15015333	Female	Bangkok			T19I	L24del	P25del	P26del	A27S			H69del	V70del			G142D												V213G				G339D		S373P	S375F	T376A	D405N	R408S	K417N	N440K			L452R	S477N	T478K	E484A	F486V
212	Deceased	EPI_ISL_15015335	Female	Chon Buri	V3G		T19I	L24del	P25del	P26del	A27S			H69del	V70del			G142D												V213G				G339D		S373P	S375F	T376A	D405N							S477N	T478K	E484A	F486V
213	Deceased	EPI_ISL_15015342	Female	Samut Prakan			T19I	L24del	P25del	P26del	A27S			H69del	V70del			G142D												V213G				G339D		S373P	S375F	T376A	D405N	R408S	K417N	N440K			L452R	S477N	T478K	E484A	F486V
214	Deceased	EPI_ISL_15015343	Female	Chon Buri			T19I	L24del	P25del	P26del	A27S			H69del	V70del			G142D												V213G				G339D		S373P	S375F	T376A	D405N	R408S	K417N	N440K			L452R	S477N	T478K	E484A	F486V
215	Deceased	EPI_ISL_15015344	Male	Bangkok			T19I	L24del	P25del	P26del	A27S			H69del	V70del			G142D												V213G				G339D		S373P	S375F	T376A	D405N	R408S	K417N	N440K			L452R	S477N	T478K	E484A	F486V
216	Deceased	EPI_ISL_15015351	Female	Bangkok			T19I	L24del	P25del	P26del	A27S			H69del	V70del			G142D												V213G				G339D		S373P	S375F	T376A	D405N							S477N	T478K	E484A	F486V
217	Deceased	EPI_ISL_15232912	Male	Lamphun			T19I	L24del	P25del	P26del	A27S			H69del	V70del			G142D												V213G				G339D		S373P	S375F	T376A	D405N	R408S	K417N	N440K			L452R	S477N	T478K	E484A	F486V
218	Deceased	EPI_ISL_15233038	Male	Samut Sakhon			T19I	L24del	P25del	P26del	A27S			H69del	V70del			G142D												V213G				G339D		S373P	S375F	T376A	D405N	R408S	K417N	N440K			L452R	S477N	T478K	E484A	F486V
219	Deceased	EPI_ISL_15233046	Female	Samut Sakhon			T19I	L24del	P25del	P26del	A27S			H69del	V70del			G142D												V213G				G339D		S373P	S375F	T376A	D405N	R408S	K417N	N440K			L452R	S477N	T478K	E484A	F486V
220	Deceased	EPI_ISL_15233083	unknown	Samut Prakan			T19I	L24del	P25del	P26del	A27S			H69del	V70del			G142D												V213G				G339D		S373P	S375F	T376A	D405N							S477N	T478K	E484A	F486V
221	Deceased	EPI_ISL_15233094	Female	Samut Prakan			T19I	L24del	P25del	P26del	A27S			H69del	V70del			G142D												V213G				G339D		S373P	S375F	T376A	D405N	R408S	K417N	N440K			L452R	S477N	T478K	E484A	F486V
222	Deceased	EPI_ISL_15233138	Female	Samut Prakan			T19I	L24del	P25del	P26del	A27S			H69del	V70del			G142D												V213G				G339D		S373P	S375F	T376A	D405N	R408S						S477N	T478K	E484A	F486V
223	Deceased	EPI_ISL_15233144	Female	Chon Buri			T19I	L24del	P25del	P26del	A27S			H69del	V70del			G142D												V213G				G339D		S373P										S477N	T478K	E484A	F486V
224	Deceased	EPI_ISL_15233156	Male	Chon Buri			T19I	L24del	P25del	P26del	A27S			H69del	V70del			G142D												V213G				G339D		S373P	S375F	T376A	D405N	R408S	K417N	N440K			L452R	S477N	T478K	E484A	F486V
225	Deceased	EPI_ISL_15233164	unknown	Samut Prakan			T19I	L24del	P25del	P26del	A27S			H69del	V70del			G142D												V213G				G339D		S373P	S375F	T376A	D405N	R408S	K417N	N440K			L452R	S477N	T478K	E484A	F486V
226	Deceased	EPI_ISL_15233215	Female	Chon Buri			T19I	L24del	P25del	P26del	A27S			H69del	V70del			G142D												V213G				G339D		S373P	S375F	T376A	D405N	R408S	K417N	N440K			L452R	S477N	T478K	E484A	F486V
227	Live	EPI_ISL_15833476	Female	Bangkok			T19I	L24del	P25del	P26del	A27S							G142D												V213G				G339D		S373P	S375F	T376A	D405N	R408S	K417N					S477N	T478K	E484A
228	Hospitalized	EPI_ISL_16355925	Female	Bangkok			T19I	L24del	P25del		A27S							G142D												V213G				G339D		S373P	S375F	T376A	D405N	R408S	K417N	N440K				S477N	T478K	E484A
229	Released	EPI_ISL_17770462	Male	Bangkok			T19I	L24del	P25del	P26del	A27S							G142D												V213G				G339D		S373P	S375F	T376A	D405N	R408S	K417N	N440K				S477N	T478K	E484A
230	Released	EPI_ISL_17770463	Male	Bangkok			T19I	L24del	P25del	P26del	A27S							G142D												V213G			H245R	G339D		S373P	S375F	T376A	D405N	R408S	K417N	N440K				S477N	T478K	E484A
231	Released	EPI_ISL_17770465	unknown	Bangkok								A67V		H69del	V70del		T95I	G142D	V143del	Y144del	Y145del							N211del	L212I		ins214EPE			G339D	R346K	S373P	S375F				K417N	N440K		G446S		S477N	T478K	E484A
232	Released	EPI_ISL_17770466	Male	Bangkok			T19I	L24del	P25del	P26del	A27S							G142D												V213G				G339D		S373P	S375F	T376A	D405N	R408S	K417N	N440K				S477N	T478K	E484A
233	Released	EPI_ISL_17770467	unknown	Bangkok			T19I	L24del	P25del	P26del	A27S							G142D												V213G				G339D		S373P	S375F	T376A	D405N	R408S	K417N	N440K				S477N	T478K	E484A
234	Released	EPI_ISL_17770468	unknown	Bangkok								A67V		H69del	V70del		T95I	G142D	V143del	Y144del	Y145del							N211del	L212I		ins214EPE			G339D		S373P	S375F				K417N	N440K		G446S		S477N	T478K	E484A
235	Released	EPI_ISL_17776299	unknown	Bangkok								A67V		H69del	V70del		T95I	G142D	V143del	Y144del	Y145del							N211del	L212I		ins214EPE			G339D	R346K	S373P	S375F				K417N	N440K		G446S		S477N	T478K	E484A
236	Released	EPI_ISL_17776603	unknown	Bangkok			T19I	L24del	P25del	P26del	A27S							G142D												V213G				G339D		S373P	S375F	T376A	D405N	R408S	K417N	N440K				S477N	T478K	E484A
237	Released	EPI_ISL_17776604	unknown	Bangkok			T19I	L24del	P25del	P26del	A27S							G142D												V213G				G339D		S373P	S375F	T376A	D405N	R408S	K417N	N440K				S477N	T478K	E484A
238	Released	EPI_ISL_17776605	unknown	Bangkok			T19I	L24del	P25del	P26del	A27S							G142D												V213G				G339D		S373P	S375F	T376A	D405N	R408S	K417N	N440K				S477N	T478K	E484A
239	Released	EPI_ISL_17778770	unknown	Bangkok			T19I	L24del	P25del	P26del	A27S							G142D												V213G				G339D		S373P	S375F	T376A	D405N	R408S	K417N	N440K				S477N	T478K	E484A
240	Released	EPI_ISL_17778771	unknown	Bangkok			T19I	L24del	P25del	P26del	A27S							G142D												V213G			H245R	G339D		S373P	S375F	T376A	D405N	R408S	K417N	N440K				S477N	T478K	E484A
241	Released	EPI_ISL_17779272	unknown	Bangkok			T19I	L24del	P25del	P26del	A27S							G142D												V213G				G339D		S373P	S375F	T376A	D405N	R408S	K417N	N440K				S477N	T478K	E484A
242	Released	EPI_ISL_17779273	unknown	Bangkok			T19I	L24del	P25del	P26del	A27S							G142D												V213G				G339D		S373P	S375F	T376A	D405N	R408S	K417N	N440K				S477N	T478K	E484A
243	Released	EPI_ISL_17779913	unknown	Bangkok			T19I	L24del	P25del	P26del	A27S							G142D												V213G				G339D		S373P	S375F	T376A	D405N	R408S	K417N	N440K				S477N	T478K	E484A
244	Released	EPI_ISL_17779914	unknown	Bangkok								A67V		H69del	V70del		T95I	G142D	V143del	Y144del								N211del	L212I		ins214EPE			G339D	R346K	S373P	S375F				K417N	N440K		G446S		S477N	T478K	E484A
245	Released	EPI_ISL_17779915	unknown	Bangkok			T19I	L24del	P25del	P26del	A27S							G142D												V213G				G339D		S373P	S375F	T376A	D405N	R408S	K417N	N440K				S477N	T478K	E484A
246	Released	EPI_ISL_17779916	unknown	Bangkok								A67V		H69del	V70del		T95I	G142D	V143del	Y144del								N211del	L212I		ins214EPE			G339D	R346K	S373P	S375F				K417N	N440K		G446S		S477N	T478K	E484A
247	Released	EPI_ISL_17779940	unknown	Bangkok			T19I	L24del	P25del	P26del	A27S							G142D												V213G				G339D		S373P	S375F	T376A	D405N	R408S	K417N	N440K	V445A			S477N	T478K	E484A
248	Released	EPI_ISL_17779941	unknown	Bangkok			T19I	L24del	P25del	P26del	A27S							G142D												V213G				G339D		S373P	S375F	T376A	D405N	R408S	K417N	N440K				S477N	T478K	E484A
249	Released	EPI_ISL_17779942	unknown	Bangkok			T19I	L24del	P25del	P26del	A27S							G142D												V213G				G339D		S373P	S375F	T376A	D405N	R408S	K417N	N440K				S477N	T478K	E484A
250	Released	EPI_ISL_17779943	unknown	Bangkok			T19I	L24del	P25del	P26del	A27S							G142D												V213G				G339D		S373P	S375F	T376A	D405N	R408S	K417N	N440K				S477N	T478K	E484A
251	Released	EPI_ISL_17779944	unknown	Bangkok			T19I	L24del	P25del	P26del	A27S							G142D												V213G				G339D		S373P	S375F	T376A	D405N	R408S	K417N	N440K				S477N	T478K	E484A
252	Released	EPI_ISL_17779948	unknown	Bangkok			T19I	L24del	P25del	P26del	A27S							G142D												V213G				G339D		S373P	S375F	T376A	D405N	R408S	K417N	N440K				S477N	T478K	E484A
253	Released	EPI_ISL_17779949	unknown	Bangkok								A67V		H69del	V70del		T95I	G142D	V143del	Y144del	Y145del							N211del	L212I		ins214EPE			G339D	R346K	S373P	S375F				K417N	N440K		G446S		S477N	T478K	E484A
254	Released	EPI_ISL_17779950	unknown	Bangkok			T19I	L24del	P25del	P26del	A27S							G142D												V213G				G339D		S373P	S375F	T376A	D405N	R408S	K417N	N440K				S477N	T478K	E484A
255	Released	EPI_ISL_17779951	unknown	Bangkok			T19I	L24del	P25del	P26del	A27S							G142D												V213G				G339D		S373P	S375F	T376A	D405N	R408S	K417N	N440K				S477N	T478K	E484A
256	Released	EPI_ISL_17779952	unknown	Bangkok			T19I	L24del	P25del	P26del	A27S							G142D												V213G				G339D		S373P	S375F	T376A	D405N	R408S	K417N	N440K				S477N	T478K	E484A
257	Released	EPI_ISL_17779953	unknown	Bangkok			T19I	L24del	P25del	P26del	A27S							G142D												V213G				G339D		S373P	S375F	T376A	D405N	R408S	K417N	N440K				S477N	T478K	E484A
258	Released	EPI_ISL_17779954	unknown	Bangkok	V3G		T19I	L24del	P25del	P26del	A27S			H69del	V70del			G142D												V213G				G339D		S373P	S375F	T376A	D405N	R408S	K417N	N440K			L452R	S477N	T478K	E484A	F486V
259	Released	EPI_ISL_17779955	unknown	Bangkok	V3G		T19I	L24del	P25del	P26del	A27S			H69del	V70del			G142D												V213G				G339D		S373P	S375F	T376A	D405N	R408S	K417N	N440K			L452R	S477N	T478K	E484A	F486V
260	Released	EPI_ISL_17779956	unknown	Bangkok			T19I	L24del	P25del	P26del	A27S		I68L					G142D												V213G				G339D		S373P	S375F	T376A	D405N	R408S	K417N	N440K			L452R	S477N	T478K	E484A	F486V
261	Released	EPI_ISL_17779957	unknown	Bangkok			T19I	L24del	P25del	P26del	A27S			H69del	V70del			G142D												V213G				G339D		S373P	S375F	T376A	D405N	R408S	K417N	N440K				S477N	T478K	E484A
262	Released	EPI_ISL_17779958	unknown	Bangkok			T19I	L24del	P25del	P26del	A27S			H69del	V70del			G142D												V213G				G339D		S373P	S375F	T376A	D405N	R408S	K417N	N440K			L452R	S477N	T478K	E484A	F486V
263	Released	EPI_ISL_17779959	unknown	Bangkok			T19I	L24del	P25del	P26del	A27S			H69del	V70del			G142D												V213G				G339D		S373P	S375F	T376A	D405N	R408S	K417N	N440K			L452R	S477N	T478K	E484A	F486V
264	Released	EPI_ISL_17779960	unknown	Bangkok			T19I	L24del	P25del	P26del	A27S			H69del	V70del			G142D												V213G				G339D		S373P	S375F	T376A	D405N	R408S	K417N	N440K			L452R	S477N	T478K	E484A	F486V
265	Released	EPI_ISL_17779961	unknown	Bangkok			T19I	L24del	P25del	P26del	A27S			H69del	V70del			G142D												V213G				G339D		S373P	S375F	T376A	D405N	R408S	K417N	N440K			L452R	S477N	T478K	E484A	F486V
266	Released	EPI_ISL_17779962	unknown	Bangkok			T19I	L24del	P25del	P26del	A27S			H69del	V70del			G142D												V213G				G339D		S373P	S375F	T376A	D405N	R408S	K417N	N440K			L452R	S477N	T478K	E484A	F486V
267	Released	EPI_ISL_17779963	unknown	Bangkok			T19I	L24del	P25del	P26del	A27S			H69del	V70del			G142D												V213G				G339D		S373P	S375F	T376A	D405N	R408S	K417N	N440K			L452R	S477N	T478K	E484A	F486V
268	Released	EPI_ISL_17779964	unknown	Bangkok			T19I	L24del	P25del	P26del	A27S			H69del	V70del			G142D												V213G				G339D		S373P	S375F	T376A	D405N	R408S	K417N	N440K			L452R	S477N	T478K	E484A	F486V
269	Released	EPI_ISL_17779965	unknown	Bangkok			T19I	L24del	P25del	P26del	A27S			H69del	V70del			G142D												V213G				G339D		S373P	S375F	T376A	D405N	R408S	K417N	N440K			L452R	S477N	T478K	E484A	F486V
270	Released	EPI_ISL_17779966	unknown	Bangkok			T19I	L24del	P25del	P26del	A27S			H69del	V70del			G142D												V213G				G339D		S373P	S375F	T376A	D405N	R408S	K417N	N440K			L452R	S477N	T478K	E484A	F486V
271	Released	EPI_ISL_17779967	unknown	Bangkok			T19I	L24del	P25del	P26del	A27S			H69del	V70del			G142D												V213G				G339D		S373P	S375F	T376A	D405N	R408S	K417N	N440K			L452R	S477N	T478K	E484A	F486V
272	Released	EPI_ISL_17779968	unknown	Bangkok			T19I	L24del	P25del	P26del	A27S			H69del	V70del			G142D												V213G				G339D		S373P	S375F	T376A	D405N	R408S	K417N	N440K			L452R	S477N	T478K	E484A	F486V
273	Released	EPI_ISL_17779969	unknown	Bangkok	V3G		T19I	L24del	P25del	P26del	A27S			H69del	V70del			G142D												V213G				G339D		S373P	S375F	T376A	D405N	R408S	K417N	N440K			L452R	S477N	T478K	E484A	F486V
274	Released	EPI_ISL_17779970	unknown	Bangkok	V3G		T19I	L24del	P25del	P26del	A27S			H69del	V70del			G142D												V213G				G339D		S373P	S375F	T376A	D405N	R408S	K417N	N440K			L452R	S477N	T478K	E484A	F486V
275	Released	EPI_ISL_17779971	Male	Bangkok			T19I	L24del	P25del	P26del	A27S			H69del	V70del			G142D												V213G				G339D		S373P	S375F	T376A	D405N	R408S	K417N	N440K			L452R	S477N	T478K	E484A	F486V
276	Released	EPI_ISL_17779972	Female	Bangkok			T19I	L24del	P25del	P26del	A27S			H69del	V70del			G142D												V213G				G339D		S373P	S375F	T376A	D405N	R408S	K417N	N440K			L452R	S477N	T478K	E484A	F486V
277	Released	EPI_ISL_17779973	unknown	Bangkok	V3G		T19I	L24del	P25del	P26del	A27S			H69del	V70del			G142D												V213G				G339D		S373P	S375F	T376A	D405N	R408S	K417N	N440K			L452R	S477N	T478K	E484A	F486V
278	Released	EPI_ISL_17779974	Female	Bangkok			T19I	L24del	P25del	P26del	A27S			H69del	V70del			G142D												V213G				G339D		S373P	S375F	T376A	D405N	R408S	K417N	N440K			L452R	S477N	T478K	E484A	F486V
279	Released	EPI_ISL_17779975	Female	Bangkok			T19I	L24del	P25del	P26del	A27S			H69del	V70del			G142D												V213G				G339D		S373P	S375F	T376A	D405N	R408S	K417N	N440K			L452R	S477N	T478K	E484A	F486V
280	Released	EPI_ISL_17779976	Male	Bangkok	V3G		T19I	L24del	P25del	P26del	A27S			H69del	V70del			G142D												V213G				G339D		S373P	S375F	T376A	D405N	R408S	K417N	N440K			L452R	S477N	T478K	E484A	F486V
281	Hospitalized	EPI_ISL_7226262	Male	Bangkok / Bangrak								A67V		H69del	V70del		T95I	G142D	V143del	Y144del	Y145del							N211del	L212I		ins214EPE			G339D		S373P	S375F				K417N	N440K		G446S		S477N	T478K	E484A
282	Hospitalized	EPI_ISL_7398681	Female	Bangkok / Nongkhaem								A67V		H69del	V70del		T95I	G142D	V143del	Y144del	Y145del							N211del	L212I		ins214EPE			G339D										G446S		S477N	T478K	E484A
283	Hospitalized	EPI_ISL_7398758	Female	Bangkok / Nongkhaem								A67V		H69del	V70del		T95I	G142D	V143del	Y144del	Y145del							N211del	L212I		ins214EPE			G339D		S373P	S375F					N440K		G446S		S477N	T478K	E484A
284	Hospitalized	EPI_ISL_7747672	Male	Bangkok / Bangplad								A67V		H69del	V70del		T95I	G142D	V143del	Y144del	Y145del							N211del	L212I		ins214EPE			G339D	R346K	S373P	S375F				K417N	N440K		G446S		S477N	T478K	E484A
285	Hospitalized	EPI_ISL_7747673	Male	Chon Buri / Sriracha								A67V		H69del	V70del		T95I	G142D	V143del	Y144del	Y145del							N211del	L212I		ins214EPE			G339D		S373P	S375F				K417N	N440K		G446S		S477N	T478K	E484A
286	Hospitalized	EPI_ISL_7747674	Male	Nonthaburi / Muang								A67V		H69del	V70del		T95I	G142D	V143del	Y144del	Y145del							N211del	L212I		ins214EPE			G339D		S373P	S375F				K417N	N440K		G446S		S477N	T478K	E484A
287	Hospitalized	EPI_ISL_7747675	Male	Bangkok / Suanluang								A67V		H69del	V70del		T95I	G142D	V143del	Y144del	Y145del							N211del	L212I			ins214XXX													L452R		T478K
288	Hospitalized	EPI_ISL_7747677	Male	Bangkok								A67V		H69del	V70del		T95I	G142D	V143del	Y144del	Y145del							N211del	L212I		ins214EPE			G339D										G446S		S477N	T478K	E484A
289	Hospitalized	EPI_ISL_7747678	Female	Bangkok								A67V		H69del	V70del		T95I	G142D	V143del	Y144del	Y145del							N211del	L212I		ins214EPE													G446S		S477N	T478K	E484A
290	Hospitalized	EPI_ISL_7747680	Female	Bangkok								A67V		H69del	V70del		T95I	G142D	V143del	Y144del	Y145del							N211del	L212I		ins214EPE			G339D		S373P	S375F				K417N	N440K		G446S		S477N	T478K	E484A
291	Asymptomatic	EPI_ISL_9712645	Male				T19I	L24del	P25del	P26del	A27S							G142D												V213G				G339D		S373P	S375F	T376A	D405N	R408S	K417N	N440K				S477N	T478K	E484A
292	Asymptomatic	EPI_ISL_9712646	Male				T19I	L24del	P25del	P26del	A27S							G142D												V213G				G339D		S373P	S375F	T376A	D405N	R408S	K417N	N440K				S477N	T478K	E484A
					V3G	L5F	T19I	L24del	P25del	P26del	A27S	A67V	I68L	H69del	V70del	S71del	T95I	G142D	V143del	Y144del	Y145del	W152L	F157del	R158del	T167S	Q183H	Y200H	N211del	L212I	V213G	ins214EPE	ins214XXX	H245R	G339D	R346K	S373P	S375F	T376A	D405N	R408S	K417N	N440K	V445A	G446S	L452R	S477N	T478K	E484A	F486V
[truncated: 56 more columns]

## Sheet: Fq mutation_raw dat
				S1																																			S2
		Both						fq							fq							fq							fq							fq							fq
		Delta		SP: 1-12		Found=1 Not found=0		/206	/292		NTD: 13-305		Found=1 Not found=0		/206	/292		RBD: 319-541		Found=1 Not found=0		/206	/292		RBM: 437-508		Found=1 Not found=0		/206	/292		S1S2': 680-685		Found=1 Not found=0		/206	/292		FP: 788-806		Found=1 Not found=0		/206	/292		S2': 808-820		Found=1 Not found=0
		Omicrom		Position	mutation	Delta	Omicron	Delta	Omicron		Position	mutation	Delta	Omicron	Delta	Omicron		Position	mutation	Delta	Omicron	Delta	Omicron		Position	mutation	Delta	Omicron	Delta	Omicron		Position	mutation	Delta	Omicron	Delta	Omicron		Position	mutation	Delta	Omicron	Delta	Omicron		Position	mutation	Delta	Omicron
SP:1-12		1		1	M1L	1	0	1	0		19	T19R	1	0	203	0		339	G339D	0	1	0	282		440	N440K	0	1	0	230		681	P681R	1	0	202	0		791	T791I	1	0	4	0		818	I818V	1	0
		3		3	V3G	0	1	0	9			T19I	0	1	0	180		346	R346K	0	1	0	80		444	K444N	1	0	1	0			P681H	0	1	0	287		796	D796Y	0	1	0	289				1	0
		5		5	L5F	1	1	2	1		24	L24del	0	1	0	179		365	Y365S	1	0	1	0		445	V445A	0	1	0	1		684	A684V	0	1	0	1		798	G798D	0	1	0	8
		10		10	L10I	1	0	1	0		25	P25del	0	1	0	179		368	L368J	1	0	1	0		446	G446S	0	1	0	85				1	2					G798S	1	0	3	0
		11		11	V11L	1	0	1	0		26	P26del	0	1	0	178		369	Y369E	1	0	1	0			G446V	1	0	2	0											2	2
NTD:13-305		19				4	2				27	A27S	0	1	0	179			-						452	L452R	1	1	205	59
		24									29	T29I	1	0	1	0		373	S373P	0	1	0	281		477	S477I	1	0	2	0
		25									67	A67V	0	1	0	114		375	S375F	0	1	0	280			S477N	0	1	0	287
		26									68	I68L	0	1	0	1		376	T376A	0	1	0	173		478	T478K	1	1	200	288
		27									69	H69del	0	1	0	181		405	D405N	0	1	0	170		484	E484A	0	1	0	288
		29									70	V70del	0	1	0	182		408	R408S	0	1	0	153		486	F486V	0	1	0	69
		67									71	S71del	0	1	0	1		417	K417N	0	1	0	235		493	Q493R	0	1	0	218
		68									80	D80A	1	0	1	0		430	T430I	1	0	1	0		496	G496S	0	1	0	109
		69									81	N81D	1	0	1	0		440	N440K	0	1	0	230		498	Q498R	0	1	0	288
		70									93	A93S	1	0	3	0		444	K444N	1	0	1	0		501	N501Y	0	1	0	288
		71									95	T95I	1	1	124	114		445	V445A	0	1	0	1		505	Y505H	0	1	0	288
		80									108	T108S	1	0	1	0		446	G446S	0	1	0	85				5	13
		81									142	G142D	1	1	159	291			G446V	1	0	2	0
		93									143	V143del	0	1	0	113		452	L452R	1	1	205	59
		95									144	Y144del	0	1	0	114		477	S477I	1	0	2	0
		108									145	Y145del	0	1	0	111			S477N	0	1	0	287
		142									152	W152L	0	1	0	1		478	T478K	1	1	200	288
		143									153	M153I	1	0	1	0		484	E484A	0	1	0	288
		144									156	E156G	1	0	197	0		486	F486V	0	1	0	69
		145									157	F157del	1	1	197	1		493	Q493R	0	1	0	218
		152									158	R158del	1	1	195	1		496	G496S	0	1	0	109
		153									159	V159del	1	0	1	0		498	Q498R	0	1	0	288
		156									160	Y160del	1	0	1	0		501	N501Y	0	1	0	288
		157									167	T167S	0	1	0	2		505	Y505H	0	1	0	288
		158									169	E169del	1	0	2	0		522	A522S	1	0	1	0
		159									170	Y170del	1	0	2	0			A522V	1	0	2	0
		160									181	G181V	1	0	1	0				11	21
		167									183	Q183H	0	1	0	1
		169									200	Y200H	0	1	0	1
		170									211	N211del	0	1	0	110
		181									212	L212I	0	1	0	110
		183									213	V213G	0	1	0	179
		200									214	ins214EPE	0	1	0	109
		211										ins214XXX	0	1	0	1
		212									216	L216F	1	0	1	0
		213									221	S221A	1	0	3	0
		214									222	A222V	1	0	11	0
		216									245	H245R	0	1	0	2
		221									258	W258R	1	0	1	0
		222									261	G261C	1	0	1	0
		245											22	27
		258
		261
		306
RBD: 319-541		339
		346
		365
		368
		369
		373
		375
		376
		405
		408
		417
		430
	RBM: 437-508	440
		444
		445
		446
		452
		477
		478
		484
		486
		493
		496
		498
		501
		505
		522
		547
		573
		614
		622
		639
		642
		643
		647
		654
		655
		658
		670
		678
		679
S1S2': 680-685		681
		684
		688
		689
		693
		701
		706
		764
		783
FP: 788-806		791
		796
		798
		807
S2': 808-820		818
		822
		832
		834
		853
		856
		879
		883
		885
HR1: 912-984		936
		939
		940
		946
		950
		954
		969
		981
		987
		1078
		1079
		1081
		1101
		1111
		1117
		1122
		1131
		1132
		1150
		1153
		1162
HR2: 1163-1213		1191
		1201
		1202
		1207
TMD: 1214-1237		1221
		1228
		1234
		1237
CD:1228-1273		1238
		1239
		1246
		1250
		1259
		1262
[truncated: 26 more columns]

## Sheet: Fq mutation%
				>50%	>49.99%
				S1
		Both						fq		fq%								fq		fq%								fq		fq%								fq		fq%								fq
		Delta		SP: 1-12		Found=1 Not found=0		/206	/292	/206	/292	Delta %fq		NTD: 13-305		Found=1 Not found=0		/206	/292	/206	/292	Delta %fq		RBD: 319-541		พบ mutation=1 ไม่พบ mutation=0		/206	/292	/206	/292	Delta %fq		RBM: 437-508		พบ mutation=1 ไม่พบ mutation=0		/206	/292	/206	/292	Delta %fq		S1S2': 680-685		Found=1 Not found=0		/206	/292
		Omicrom		Position	mutation	Delta	Omicron	Delta	Omicron	Delta	Omicron			Position	mutation	Delta	Omicron	Delta	Omicron	Delta	Omicron			Position	mutation	Delta	Omicron	Delta	Omicron	Delta	Omicron			Position	mutation	Delta	Omicron	Delta	Omicron	Delta	Omicron			Position	mutation	Delta	Omicron	Delta	Omicron
SP:1-12		1		1	M1L	1	0	1	0	0.485437	0	0.485437		19	T19R	1	0	203	0	98.5437	0	98.5437		339	G339D	0	1	0	282	0	96.5753	96.5753		440	N440K	0	1	0	230	0	78.7671	78.7671		681	P681R	1	0	202	0
		3		3	V3G	0	1	0	9	0	3.08219	3.08219			T19I	0	1	0	180	0	61.6438	61.6438		346	R346K	0	1	0	80	0	27.3973	27.3973		444	K444N	1	0	1	0	0.485437	0	0.485437			P681H	0	1	0	287
		5		5	L5F	1	1	2	1	0.970874	0.342466	0.628408		24	L24del	0	1	0	179	0	61.3014	61.3014		365	Y365S	1	0	1	0	0.485437	0	0.485437		445	V445A	0	1	0	1	0	0.342466	0.342466		684	A684V	0	1	0	1
		10		10	L10I	1	0	1	0	0.485437	0	0.485437		25	P25del	0	1	0	179	0	61.3014	61.3014		368	L368J	1	0	1	0	0.485437	0	0.485437		446	G446S	0	1	0	85	0	29.1096	29.1096				1	2
		11		11	V11L	1	0	1	0	0.485437	0	0.485437		26	P26del	0	1	0	178	0	60.9589	60.9589		369	Y369E	1	0	1	0	0.485437	0	0.485437			G446V	1	0	2	0	0.970874	0	0.970874
NTD:13-305		19				4	2							27	A27S	0	1	0	179	0	61.3014	61.3014		373	S373P	0	1	0	281	0	96.2329	96.2329		452	L452R	1	1	205	59	99.5146	20.2055	79.3091
		24												29	T29I	1	0	1	0	0.485437	0	0.485437		375	S375F	0	1	0	280	0	95.8904	95.8904		477	S477I	1	0	2	0	0.970874	0	0.970874
		25												67	A67V	0	1	0	114	0	39.0411	39.0411		376	T376A	0	1	0	173	0	59.2466	59.2466			S477N	0	1	0	287	0	98.2877	98.2877
		26												68	I68L	0	1	0	1	0	0.342466	0.342466		405	D405N	0	1	0	170	0	58.2192	58.2192		478	T478K	1	1	200	288	97.0874	98.6301	1.54276
		27												69	H69del	0	1	0	181	0	61.9863	61.9863		408	R408S	0	1	0	153	0	52.3973	52.3973		484	E484A	0	1	0	288	0	98.6301	98.6301
		29												70	V70del	0	1	0	182	0	62.3288	62.3288		417	K417N	0	1	0	235	0	80.4795	80.4795		486	F486V	0	1	0	69	0	23.6301	23.6301
		67												71	S71del	0	1	0	1	0	0.342466	0.342466		430	T430I	1	0	1	0	0.485437	0	0.485437		493	Q493R	0	1	0	218	0	74.6575	74.6575
		68												80	D80A	1	0	1	0	0.485437	0	0.485437		440	N440K	0	1	0	230	0	78.7671	78.7671		496	G496S	0	1	0	109	0	37.3288	37.3288
		69												81	N81D	1	0	1	0	0.485437	0	0.485437		444	K444N	1	0	1	0	0.485437	0	0.485437		498	Q498R	0	1	0	288	0	98.6301	98.6301
		70												93	A93S	1	0	3	0	1.45631	0	1.45631		445	V445A	0	1	0	1	0	0.342466	0.342466		501	N501Y	0	1	0	288	0	98.6301	98.6301
		71												95	T95I	1	1	124	114	60.1942	39.0411	21.1531		446	G446S	0	1	0	85	0	29.1096	29.1096		505	Y505H	0	1	0	288	0	98.6301	98.6301
		80												108	T108S	1	0	1	0	0.485437	0	0.485437			G446V	1	0	2	0	0.970874	0	0.970874				5	13
		81												142	G142D	1	1	159	291	77.1845	99.6575	22.4731		452	L452R	1	1	205	59	99.5146	20.2055	79.3091		N440K	0	1	0	230	0	78.7671	78.7671	0 (0.0)	230 (78.8)	78.7671
		93												143	V143del	0	1	0	113	0	38.6986	38.6986		477	S477I	1	0	2	0	0.970874	0	0.970874		L452R	205	1	205	59	99.5146	20.2055	79.3091	205 (99.5)	59 (20.2)	79.3091
		95												144	Y144del	0	1	0	114	0	39.0411	39.0411			S477N	0	1	0	287	0	98.2877	98.2877		S477N	0	1	0	287	0	98.2877	98.2877	0 (0.0)	287 (98.3)	98.2877
		108												145	Y145del	0	1	0	111	0	38.0137	38.0137		478	T478K	1	1	200	288	97.0874	98.6301	1.54276		E484A	0	1	0	288	0	98.6301	98.6301	0 (0.0)	288 (98.6)	98.6301
		142												152	W152L	0	1	0	1	0	0.342466	0.342466		484	E484A	0	1	0	288	0	98.6301	98.6301		Q493R	0	1	0	218	0	74.6575	74.6575	0 (0.0)	218 (74.7)	74.6575
		143												153	M153I	1	0	1	0	0.485437	0	0.485437		486	F486V	0	1	0	69	0	23.6301	23.6301		Q498R	0	1	0	288	0	98.6301	98.6301	0 (0.0)	288 (98.6)	98.6301
		144												156	E156G	1	0	197	0	95.6311	0	95.6311		493	Q493R	0	1	0	218	0	74.6575	74.6575		N501Y	0	1	0	288	0	98.6301	98.6301	0 (0.0)	288 (98.6)	98.6301
		145												157	F157del	1	1	197	1	95.6311	0.342466	95.2886		496	G496S	0	1	0	109	0	37.3288	37.3288		Y505H	0	1	0	288	0	98.6301	98.6301	0 (0.0)	288 (98.6)	98.6301
		152												158	R158del	1	1	195	1	94.6602	0.342466	94.3177		498	Q498R	0	1	0	288	0	98.6301	98.6301
		153												159	V159del	1	0	1	0	0.485437	0	0.485437		501	N501Y	0	1	0	288	0	98.6301	98.6301
		156												160	Y160del	1	0	1	0	0.485437	0	0.485437		505	Y505H	0	1	0	288	0	98.6301	98.6301
		157												167	T167S	0	1	0	2	0	0.684932	0.684932		522	A522S	1	0	1	0	0.485437	0	0.485437
		158												169	E169del	1	0	2	0	0.970874	0	0.970874			A522V	1	0	2	0	0.970874	0	0.970874
		159												170	Y170del	1	0	2	0	0.970874	0	0.970874				11	21
		160												181	G181V	1	0	1	0	0.485437	0	0.485437
		167												183	Q183H	0	1	0	1	0	0.342466	0.342466
		169												200	Y200H	0	1	0	1	0	0.342466	0.342466
		170												211	N211del	0	1	0	110	0	37.6712	37.6712
		181												212	L212I	0	1	0	110	0	37.6712	37.6712
		183												213	V213G	0	1	0	179	0	61.3014	61.3014
		200												214	ins214EPE	0	1	0	109	0	37.3288	37.3288
		211													ins214XXX	0	1	0	1	0	0.342466	0.342466
		212												216	L216F	1	0	1	0	0.485437	0	0.485437
		213												221	S221A	1	0	3	0	1.45631	0	1.45631
		214												222	A222V	1	0	11	0	5.33981	0	5.33981
		216												245	H245R	0	1	0	2	0	0.684932	0.684932
		221												258	W258R	1	0	1	0	0.485437	0	0.485437
		222												261	G261C	1	0	1	0	0.485437	0	0.485437
		245														22	27
		258
		261
		306
RBD: 319-541		339
		346
		365
		368
		369
		371
		373
		375
		376
		405
		408
		417
		430
	RBM: 437-508	440
		444
		445
		446
		452
		477
		478
		484
		486
		493
		496
		498
		501
		505
		522
		547
		573
		614
		622
		639
		642
		643
		647
		654
		655
		658
		670
		678
		679
S1S2': 680-685		681
		684
		688
		689
		693
		701
		706
		764
		783
FP: 788-806		791
		796
		798
		807
S2': 808-820		818
		822
		832
		834
		853
		856
		879
		883
		885
HR1: 912-984		936
		939
		940
		946
		950
		954
		969
		981
		987
		1078
		1079
		1081
		1101
		1111
		1117
		1122
		1131
		1132
		1150
		1153
		1162
HR2: 1163-1213		1191
		1201
		1202
		1207
TMD: 1214-1237		1221
		1228
		1234
		1237
CD:1228-1273		1238
		1239
		1246
		1250
		1259
		1262
[truncated: 57 more columns]

## Sheet: Sheet1
	S1																																			S2
					fq							fq							fq							fq							fq							fq							fq
	SP: 1-12		พบ mutation=1 ไม่พบ mutation=0		/206	/292		NTD: 13-305		พบ mutation=1 ไม่พบ mutation=0		/206	/292		RBD: 319-541		พบ mutation=1 ไม่พบ mutation=0		/206	/292		RBM: 437-508		พบ mutation=1 ไม่พบ mutation=0		/206	/292		S1S2': 680-685		พบ mutation=1 ไม่พบ mutation=0		/206	/292		FP: 788-806		พบ mutation=1 ไม่พบ mutation=0		/206	/292		S2': 808-820		พบ mutation=1 ไม่พบ mutation=0		/206	/292
	Position	mutation	Delta	Omicron	Delta	Omicron		Position	mutation	Delta	Omicron	Delta	Omicron		Position	mutation	Delta	Omicron	Delta	Omicron		Position	mutation	Delta	Omicron	Delta	Omicron		Position	mutation	Delta	Omicron	Delta	Omicron		Position	mutation	Delta	Omicron	Delta	Omicron		Position	mutation	Delta	Omicron	Delta	Omicron
	1	M1L	1	0	1	0		19	T19R	1	0	203	0		339	G339D	0	1		282		440	N440K	0	1	0	230		681	P681R	1	0	202	0		791	T791I	1	0	4	0		818	I818V	1	0	1	0
	3	V3G	0	1	0	9			T19I	0	1	0	180		346	R346K	0	1	0	80		444	K444N	1	0	1	0			P681H	0	1	0	287		796	D796Y	0	1	0	289
	5	L5F	1	1	2	1		24	L24del	0	1	0	179		365	Y365S	1	0	1	0		445	V445A	0	1	0	1		684	A684V	0	1	0	1		798	G798D	0	1	0	8
	10	L10I	1	0	1	0		25	P25del	0	1	0	179		368	L368J	1	0	1	0		446	G446S	0	1	0	85										G798S	1	0	3	0
	11	V11L	1	0	1	0		26	P26del	0	1	0	178		369	Y369E	1	0	1	0			G446V	1	0	2	0
								27	A27S	0	1	0	179		371	-						452	L452R	1	1	205	59
								29	T29I	1	0	1	0		373	S373P	0	1	0	281		477	S477I	1	0	2	0
								67	A67V	0	1	0	114		375	S375F	0	1	0	280			S477N	0	1	0	287
								68	I68L	0	1	0	1		376	T376A	0	1	0	173		478	T478K	1	1	200	288
								69	H69del	0	1	0	181		405	D405N	0	1	0	170		484	E484A	0	1	0	288
								70	V70del	0	1	0	182		408	R408S	0	1	0	153		486	F486V	0	1	0	69
								71	S71del	0	1	0	1		417	K417N	0	1	0	235		493	Q493R	0	1	0	218
								80	D80A	1	0	1	0		430	T430I	1	0	1	0		496	G496S	0	1	0	109
								81	N81D	1	0	1	0		440	N440K	0	1	0	230		498	Q498R	0	1	0	288
								93	A93S	1	0	3	0		444	K444N	1	0	1	0		501	N501Y	0	1	0	288
								95	T95I	1	1	124	114		445	V445A	0	1	0	1		505	Y505H	0	1	0	288
								108	T108S	1	0	1	0		446	G446S	0	1	0	85
								142	G142D	1	1	159	291			G446V	1	0	2	0
								143	V143del	0	1	0	113		452	L452R	1	1	205	59
								144	Y144del	0	1	0	114		477	S477I	1	0	2	0
								145	Y145del	0	1	0	111			S477N	0	1	0	287
								152	W152L	0	1	0	1		478	T478K	1	1	200	288
								153	M153I	1	0	1	0		484	E484A	0	1	0	288
								156	E156G	1	0	197	0		486	F486V	0	1	0	69
								157	F157del	1	1	197	1		493	Q493R	0	1	0	218
								158	R158del	1	1	195	1		496	G496S	0	1	0	109
								159	V159del	1	0	1	0		498	Q498R	0	1	0	288
								160	Y160del	1	0	1	0		501	N501Y	0	1	0	288
								167	T167S	0	1	0	2		505	Y505H	0	1	0	288
								169	E169del	1	0	2	0		522	A522S	1	0	1	0
								170	Y170del	1	0	2	0			A522V	1	0	2	0
								181	G181V	1	0	1	0
								183	Q183H	0	1	0	1
								200	Y200H	0	1	0	1
								211	N211del	0	1	0	110
								212	L212I	0	1	0	110
								213	V213G	0	1	0	179
								214	ins214EPE	0	1	0	109
									ins214XXX	0	1	0	1
								216	L216F	1	0	1	0
								221	S221A	1	0	3	0
								222	A222V	1	0	11	0
								245	H245R	0	1	0	2
								258	W258R	1	0	1	0
								261	G261C	1	0	1	0
[truncated: 24 more columns]

## Sheet: Fq mutation_%
				S1																									S2
		Both				fq					fq					fq					fq					fq					fq					fq					fq					fq
		Delta		SP: 1-12		/206	/292		NTD: 13-305		/206	/292		RBD: 319-541		/206	/292		RBM: 437-508		/206	/292		S1S2': 680-685		/206	/292		FP: 788-806		/206	/292		S2': 808-820		/206	/292		HR1: 912-984		/206	/292		HR2: 1163-1213		/206	/292		TMD: 1214-1237
		Omicrom		Position	mutation	Delta	Omicron		Position	mutation	Delta	Omicron		Position	mutation	Delta	Omicron		Position	mutation	Delta	Omicron		Position	mutation	Delta	Omicron		Position	mutation	Delta	Omicron		Position	mutation	Delta	Omicron		Position	mutation	Delta	Omicron		Position	mutation	Delta	Omicron		Position
SP:1-12		1		1	M1L	0.485437	0
		3		3	V3G	0	3.08219
		5		5	L5F	0.970874	0.342466
		10		10	L10I	0.485437	0
		11		11	V11L	0.485437	0
NTD:13-305		19
		24
		25
		26
		27
		29
		67
		68
		69
		70
		71
		80
		81
		93
		95
		108
		142
		143
		144
		145
		152
		153
		156
		157
		158
		159
		160
		167
		169
		170
		181
		183
		200
		211
		212
		213
		214
		216
		221
		222
		245
		258
		261
		306
RBD: 319-541		339
		346
		365
		368
		369
		371
		373
		375
		376
		405
		408
		417
		430
	RBM: 437-508	440
		444
		445
		446
		452
		477
		478
		484
		486
		493
		496
		498
		501
		505
		522
		547
		573
		614
		622
		639
		642
		643
		647
		654
		655
		658
		670
		678
		679
S1S2': 680-685		681
		684
		688
		689
		693
		701
		706
		764
		783
FP: 788-806		791
		796
		798
		807
S2': 808-820		818
		822
		832
		834
		853
		856
		879
		883
		885
HR1: 912-984		936
		939
		940
		946
		950
		954
		969
		981
		987
		1078
		1079
		1081
		1101
		1111
		1117
		1122
		1131
		1132
		1150
		1153
		1162
HR2: 1163-1213		1191
		1201
		1202
		1207
TMD: 1214-1237		1221
		1228
		1234
		1237
CD:1228-1273		1238
		1239
		1246
		1250
		1259
		1262
[truncated: 7 more columns]
